# Supplementary material for: Transcriptome sequencing of Verticillium dahliae from a cotton farm reveals positive correlation between virulence and tolerance of sugar-induced hyperosmosis
Source: PeerJ journal article supplement (doi:10.7717/peerj.8035), 2019-11-11

# GO enrichment

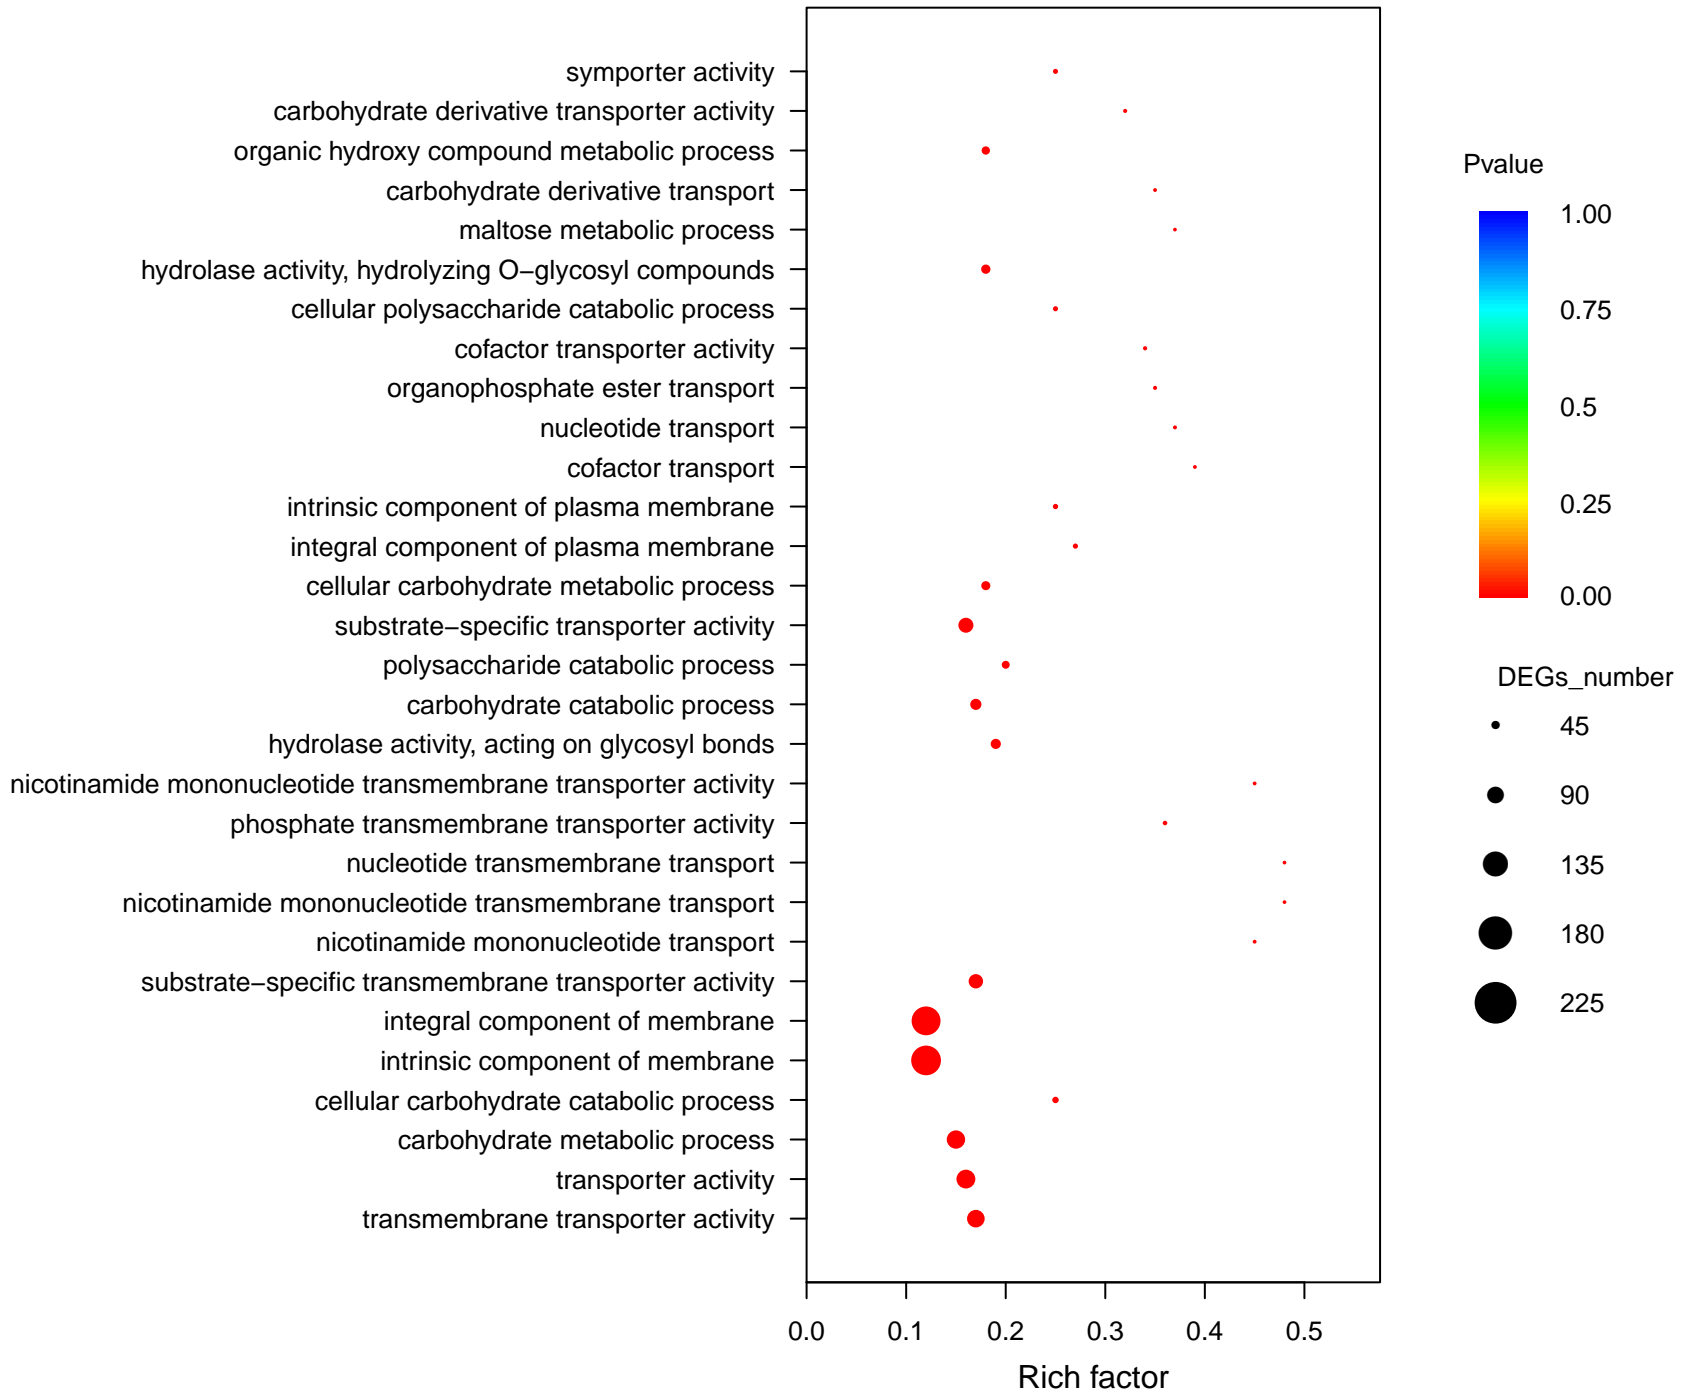

Supplement: Supplemental_files_Figure_S3.pdf [file Supplemental_files_Figure_S3.pdf]
