# Supplementary material for: Transcriptome sequencing of Verticillium dahliae from a cotton farm reveals positive correlation between virulence and tolerance of sugar-induced hyperosmosis
Source: PeerJ. 2019 Nov 11;7:e8035. doi: 10.7717/peerj.8035 (PMC6855202; doi:10.7717/peerj.8035)
Supplement: Table S2 [file peerj-07-8035-s003.xlsx]

## Sheet: V4_V5
Gene_id	baseMean	baseMeanA	baseMeanB	foldChange	log2FoldChange	pval	padj	SHZvd-5	SHZvd-4	Gene_name	Gene_descriptions	CDD	KOG	NR	NT	PFAM	Swissprot	TrEMBL	GO	KEGG
c10004_g1	61.9761	39.4974	84.4547	2.13823	1.09642	1.33e-06	5.07e-06	10.93	23.77	-	-	-	-	-	-	-	-	-	-	-
c1004_g1	7.86459	14.9818	0.747387	0.0498864	-4.32521	8.11e-06	2.89e-05	1.98	0.1	-	-	-	-	-	-	-	-	-	-	-
c10050_g1	9.53386	19.0677	0	0	#NAME?	1.39e-08	6.1e-08	6.45	0	-	-	2e-24 gnl|CDD|203516 pfam06766, Hydrophobin_2, Fungal hydrophobin. This is a family of fungal hydrophobins that seems to be restricted to ascomycetes. These are small, moderately hydrophobic extracellular proteins that have eight cysteine residues arranged in a strictly conserved motif. Hydrophobins are generally found on the outer surface of conidia and of the hyphal wall, and may be involved in…	-	8e-62 gb|AAY89101.1| class II hydrophobin [Verticillium dahliae] gb|EGY20257.1| hypothetical protein VDAG_02273 [Verticillium dahliae VdLs.17]	6e-179 ref|XM_003001989.1| Verticillium albo-atrum VaMs.102 class II hydrophobin, mRNA	5e-25 gnl|CDD|203516 pfam06766, Hydrophobin_2, Fungal hydrophobin. This is a family of fungal hydrophobins that seems to be restricted to ascomycetes. These are small, moderately hydrophobic extracellular proteins that have eight cysteine residues arranged in a strictly conserved motif. Hydrophobins are generally found on the outer surface of conidia and of the hyphal wall, and may be involved in…	1e-14 sp|Q06153|CEUL_OPHUL Cerato-ulmin OS=Ophiostoma ulmi GN=CU PE=1 SV=1	1e-61 tr|Q1PSW0|Q1PSW0_VERDA Class II hydrophobin OS=Verticillium dahliae GN=VDH1 PE=4 SV=1	GO:0005618,cell wall;GO:0005576,extracellular region;GO:0009405,pathogenesis	-
c1008_g1	23.3443	34.7305	11.9582	0.344314	-1.5382	7.26e-05	0.000234712	3.88	1.35	-	-	-	-	-	-	-	-	-	-	-
c1009_g1	3316.74	1413.74	5219.75	3.69217	1.88447	8.32e-12	4.95e-11	40.26	148.92	-	-	0.0 gnl|CDD|181834 PRK09414, PRK09414, glutamate dehydrogenase; Provisional.	4e-157 gnl|CDD|230189 KOG2250, KOG2250, KOG2250, Glutamate/leucine/phenylalanine/valine dehydrogenases [Amino acid transport and metabolism].	0.0 emb|CCF37615.1| NADP-specific glutamate dehydrogenase [Colletotrichum higginsianum]	0.0 ref|XM_956468.2| Neurospora crassa OR74A NADP-specific glutamate dehydrogenase partial mRNA	6e-91 gnl|CDD|215789 pfam00208, ELFV_dehydrog, Glutamate/Leucine/Phenylalanine/Valine dehydrogenase.	0.0 sp|O93934|DHE4_BOTFU NADP-specific glutamate dehydrogenase OS=Botryotinia fuckeliana GN=gdhA PE=3 SV=1	0.0 tr|H1VBL2|H1VBL2_COLHI Glutamate dehydrogenase OS=Colletotrichum higginsianum (strain IMI 349063) GN=CH063_01734 PE=3 SV=1	GO:0016639,oxidoreductase activity, acting on the CH-NH2 group of donors, NAD or NADP as acceptor;GO:0004354,glutamate dehydrogenase (NADP+) activity;GO:0000166,nucleotide binding;GO:0006520,cellular amino acid metabolic process	K00262-ko00910,Nitrogen metabolism;ko00250,Alanine, aspartate and glutamate metabolism;ko00330,Arginine and proline metabolism
c1011_g1	672.466	915.932	429	0.468376	-1.09426	1.65e-56	3.21e-55	28.74	13.5	-	-	-	6e-07 gnl|CDD|231603 KOG3671, KOG3671, KOG3671, Actin regulatory protein (Wiskott-Aldrich syndrome protein) [Signal transduction mechanisms, Cytoskeleton].	0.0 gb|EGY14422.1| hypothetical protein VDAG_05586 [Verticillium dahliae VdLs.17]	0.0 ref|XM_003001710.1| Verticillium albo-atrum VaMs.102 conserved hypothetical protein, mRNA	-	1e-20 sp|P47114|YJ24_YEAST Uncharacterized vacuolar membrane protein YJR054W OS=Saccharomyces cerevisiae (strain ATCC 204508 / S288c) GN=YJR054W PE=1 SV=1	0.0 tr|G2X5T1|G2X5T1_VERDV Putative uncharacterized protein OS=Verticillium dahliae (strain VdLs.17 / ATCC MYA-4575 / FGSC 10137) GN=VDAG_05586 PE=4 SV=1	GO:0016021,integral to membrane;GO:0000324,fungal-type vacuole;GO:0005774,vacuolar membrane	-
c10122_g1	115.377	185.91	44.8432	0.241209	-2.05165	1.24e-29	1.58e-28	62.64	15.42	VDBG_07104	hypothetical protein	-	-	1e-15 ref|XP_003002533.1| conserved hypothetical protein [Verticillium alfalfae VaMs.102] gb|EEY20994.1| conserved hypothetical protein [Verticillium alfalfae VaMs.102]	-	-	-	2e-15 tr|C9SQ69|C9SQ69_VERA1 Putative uncharacterized protein OS=Verticillium albo-atrum (strain VaMs.102 / ATCC MYA-4576 / FGSC 10136) GN=VDBG_07104 PE=4 SV=1	GO:0003677,DNA binding;GO:0003682,chromatin binding	-
c10126_g1	218.872	140.284	297.46	2.12041	1.08435	6.49e-13	4.34e-12	7.26	15.45	-	-	-	-	0.0 gb|EGY21508.1| hypothetical protein VDAG_10490 [Verticillium dahliae VdLs.17]	-	-	-	0.0 tr|G2XK08|G2XK08_VERDV Putative uncharacterized protein OS=Verticillium dahliae (strain VdLs.17 / ATCC MYA-4575 / FGSC 10137) GN=VDAG_10490 PE=4 SV=1	-	-
c10127_g1	6.5026	12.2578	0.747387	0.0609722	-4.0357	9.1e-05	0.000291291	1.24	0.08	-	-	0.0 gnl|CDD|237103 PRK12447, PRK12447, histidinol dehydrogenase; Reviewed.	9e-56 gnl|CDD|230636 KOG2697, KOG2697, KOG2697, Histidinol dehydrogenase [Amino acid transport and metabolism].	0.0 gb|EGY21988.1| histidinol dehydrogenase [Verticillium dahliae VdLs.17]	0.0 ref|XM_003003786.1| Verticillium albo-atrum VaMs.102 histidinol dehydrogenase, mRNA	3e-103 gnl|CDD|216133 pfam00815, Histidinol_dh, Histidinol dehydrogenase.	2e-133 sp|Q5WIU9|HISX1_BACSK Histidinol dehydrogenase 1 OS=Bacillus clausii (strain KSM-K16) GN=hisD1 PE=3 SV=1	0.0 tr|G2WZI6|G2WZI6_VERDV Histidinol dehydrogenase OS=Verticillium dahliae (strain VdLs.17 / ATCC MYA-4575 / FGSC 10137) GN=VDAG_03428 PE=3 SV=1	GO:0000105,histidine biosynthetic process;GO:0008270,zinc ion binding;GO:0004399,histidinol dehydrogenase activity;GO:0051287,NAD binding;GO:0046872,metal ion binding	K00013-ko01230,Biosynthesis of amino acids;ko00340,Histidine metabolism
c10143_g1	24.3658	36.7735	11.9582	0.325185	-1.62067	2.21e-05	7.56e-05	7.08	2.33	-	-	4e-34 gnl|CDD|226130 COG3602, COG3602, Uncharacterized protein conserved in bacteria [Function unknown].	-	6e-68 gb|EGY21682.1| hypothetical protein VDAG_03122 [Verticillium dahliae VdLs.17]	0.0 ref|XM_003003474.1| Verticillium albo-atrum VaMs.102 conserved hypothetical protein, mRNA	2e-08 gnl|CDD|222411 pfam13840, ACT_7, Family description. The ACT domain is a structural motif of 70-90 amino acids that functions in the control of metabolism, solute transport and signal transduction. They are thus found in a variety of different proteins in a variety of different arrangements. In mammalian phenylalanine hydroxylase the domain forms no contacts but promotes an allosteric effec…	-	7e-68 tr|G2WYN0|G2WYN0_VERDV Putative uncharacterized protein OS=Verticillium dahliae (strain VdLs.17 / ATCC MYA-4575 / FGSC 10137) GN=VDAG_03122 PE=4 SV=1	-	-
c10152_g1	31.1757	50.3933	11.9582	0.237297	-2.07523	3.83e-09	1.74e-08	3.22	0.77	-	-	-	-	0.0 gb|EGY17045.1| hypothetical protein VDAG_08209 [Verticillium dahliae VdLs.17]	0.0 ref|XM_003001449.1| Verticillium albo-atrum VaMs.102 conserved hypothetical protein, mRNA	-	-	0.0 tr|G2XDH7|G2XDH7_VERDV Putative uncharacterized protein OS=Verticillium dahliae (strain VdLs.17 / ATCC MYA-4575 / FGSC 10137) GN=VDAG_08209 PE=4 SV=1	-	-
c10179_g1	126.106	180.462	71.7491	0.397585	-1.33066	2.63e-16	2.14e-15	26.57	10.66	-	-	-	-	-	-	-	-	-	-	-
c1019_g1	7.06698	0.68099	13.453	19.755	4.30415	1.69e-05	5.83e-05	0.17	3.31	-	-	-	-	-	-	-	-	-	-	-
c10208_g1	24.7387	6.12891	43.3484	7.07278	2.82228	3.5e-11	1.93e-10	0.56	4	-	-	-	-	-	-	-	-	-	-	-
c10216_g1	38.8897	22.4727	55.3066	2.46106	1.29928	7.78e-06	2.77e-05	3.28	8.16	-	-	-	-	1e-76 gb|EGY21367.1| hypothetical protein VDAG_02891 [Verticillium dahliae VdLs.17]	0.0 ref|XM_003008184.1| Verticillium albo-atrum VaMs.102 predicted protein, mRNA	-	-	1e-76 tr|G2WXB2|G2WXB2_VERDV Putative uncharacterized protein OS=Verticillium dahliae (strain VdLs.17 / ATCC MYA-4575 / FGSC 10137) GN=VDAG_02891 PE=4 SV=1	-	-
c10222_g1	103.268	143.008	63.5279	0.444226	-1.17063	4.34e-11	2.37e-10	50.38	22.86	-	-	-	-	-	7e-39 ref|XM_003003255.1| Verticillium albo-atrum VaMs.102 MYB and HSA domain-containing protein, mRNA	-	-	-	-	-
c10224_g1	92.046	43.5834	140.509	3.22391	1.68881	0	0	8.41	27.44	-	-	-	-	-	1e-72 gb|FJ851509.1| Verticillium dahliae isolate Oe1006 microsatellite VD12 sequence	-	-	-	-	-
c10255_g1	36.0669	49.7123	22.4216	0.451027	-1.14871	0.000139284	0.000434855	13.1	6.01	-	-	-	-	-	-	-	-	-	-	-
c10257_g1	122.64	59.9271	185.352	3.09296	1.62899	0	0	7.23	22.52	-	-	5e-57 gnl|CDD|219133 pfam06682, DUF1183, Protein of unknown function (DUF1183). This family consists of several eukaryotic proteins of around 360 residues in length. The function of this family is unknown.	-	4e-94 gb|EGY19307.1| transmembrane protein [Verticillium dahliae VdLs.17]	0.0 ref|XM_003006389.1| Verticillium albo-atrum VaMs.102 transmembrane protein, mRNA	1e-57 gnl|CDD|219133 pfam06682, DUF1183, Protein of unknown function (DUF1183). This family consists of several eukaryotic proteins of around 360 residues in length. The function of this family is unknown.	7e-22 sp|Q96BY9|SARAF_HUMAN Store-operated calcium entry-associated regulatory factor OS=Homo sapiens GN=TMEM66 PE=1 SV=1	5e-94 tr|G2XHL3|G2XHL3_VERDV Transmembrane protein OS=Verticillium dahliae (strain VdLs.17 / ATCC MYA-4575 / FGSC 10137) GN=VDAG_09767 PE=4 SV=1	GO:2001256,regulation of store-operated calcium entry;GO:0015279,store-operated calcium channel activity;GO:0016021,integral to membrane;GO:0030176,integral to endoplasmic reticulum membrane	-
c10260_g1	160.215	2.04297	318.387	155.845	7.28397	6.66e-16	5.31e-15	0.38	59.63	-	-	-	-	-	-	-	-	-	-	-
c1029_g1	21.5755	32.6875	10.4634	0.320104	-1.64339	5.48e-05	0.000179992	11.5	3.77	-	-	-	-	-	-	-	-	-	-	-
c103_g1	123.097	73.5469	172.646	2.34743	1.23108	0	0	2.99	7.04	-	-	-	-	-	-	-	-	-	-	-
c1030_g1	177.412	247.199	107.624	0.435372	-1.19968	9.02e-19	8.16e-18	44.44	19.57	-	-	-	-	-	-	-	-	-	-	-
c1040_g1	44.8781	60.6081	29.1481	0.480927	-1.05611	8.28e-05	0.000266577	6.61	3.2	-	-	9e-58 gnl|CDD|191436 pfam06042, DUF925, Bacterial protein of unknown function (DUF925). This family consists of several hypothetical bacterial proteins of unknown function. This family was recently identified as belonging to the nucleotidyltransferase superfamily.	-	8e-160 gb|EGY21898.1| hypothetical protein VDAG_03338 [Verticillium dahliae VdLs.17]	0.0 ref|XM_003003693.1| Verticillium albo-atrum VaMs.102 conserved hypothetical protein, mRNA	2e-58 gnl|CDD|191436 pfam06042, DUF925, Bacterial protein of unknown function (DUF925). This family consists of several hypothetical bacterial proteins of unknown function. This family was recently identified as belonging to the nucleotidyltransferase superfamily.	-	1e-159 tr|G2WZ96|G2WZ96_VERDV Putative uncharacterized protein OS=Verticillium dahliae (strain VdLs.17 / ATCC MYA-4575 / FGSC 10137) GN=VDAG_03338 PE=4 SV=1	-	-
c10463_g1	11.1112	2.04297	20.1794	9.8775	3.30415	1.39e-06	5.29e-06	0.44	4.4	-	-	-	-	-	-	-	-	-	-	-
c1052_g1	41.9882	58.5652	25.4112	0.433895	-1.20458	1.72e-05	5.93e-05	2.4	1.05	-	-	8e-10 gnl|CDD|224117 COG1196, Smc, Chromosome segregation ATPases [Cell division and chromosome partitioning].	2e-08 gnl|CDD|232521 KOG4593, KOG4593, KOG4593, Mitotic checkpoint protein MAD1 [Cell cycle control, cell division, chromosome partitioning].	0.0 gb|EGY16376.1| hypothetical protein VDAG_07540 [Verticillium dahliae VdLs.17]	1e-172 ref|XM_003004440.1| Verticillium albo-atrum VaMs.102 predicted protein, mRNA	2e-07 gnl|CDD|205692 pfam13514, AAA_27, AAA domain. This domain is found in a number of double-strand DNA break proteins. This domain contains a P-loop motif.	-	0.0 tr|G2XBK8|G2XBK8_VERDV Putative uncharacterized protein OS=Verticillium dahliae (strain VdLs.17 / ATCC MYA-4575 / FGSC 10137) GN=VDAG_07540 PE=4 SV=1	-	-
c1054_g1	28.1113	44.2644	11.9582	0.270154	-1.88815	2.17e-07	8.71e-07	5.54	1.51	-	-	-	-	-	-	-	-	-	-	-
c1056_g1	1899.19	726.617	3071.76	4.22748	2.0798	0	0	45.88	194.79	-	-	-	-	4e-131 gb|EGY21776.1| hypothetical protein VDAG_03216 [Verticillium dahliae VdLs.17]	0.0 ref|XM_003003568.1| Verticillium albo-atrum VaMs.102 predicted protein, mRNA	-	-	4e-131 tr|G2WYX4|G2WYX4_VERDV Putative uncharacterized protein OS=Verticillium dahliae (strain VdLs.17 / ATCC MYA-4575 / FGSC 10137) GN=VDAG_03216 PE=4 SV=1	-	-
c10609_g1	28.9242	12.2578	45.5906	3.71931	1.89503	9.33e-08	3.84e-07	14.11	55.02	-	-	-	-	-	-	-	-	-	-	-
c10654_g1	22.7715	38.8164	6.72648	0.17329	-2.52874	6.29e-09	2.82e-08	23.17	4.15	-	-	-	-	-	2e-127 ref|XM_003006347.1| Verticillium albo-atrum VaMs.102 cellulose-growth-specific protein, mRNA	-	-	-	-	-
c10656_g1	15.6951	0	31.3902	Inf	Inf	2.95e-14	2.16e-13	0	4.13	VDBG_09004	hypothetical protein	6e-06 gnl|CDD|238125 cd00204, ANK, ankyrin repeats; ankyrin repeats mediate protein-protein interactions in very diverse families of proteins. The number of ANK repeats in a protein can range from 2 to over 20 (ankyrins, for example). ANK repeats may occur in combinations with other types of domains. The structural repeat unit contains two antiparallel helices and a beta-hairpin, repeats are stac…	-	4e-140 ref|XP_003000509.1| predicted protein [Verticillium alfalfae VaMs.102] gb|EEY22894.1| predicted protein [Verticillium alfalfae VaMs.102]	0.0 ref|XM_003000463.1| Verticillium albo-atrum VaMs.102 predicted protein, mRNA	2e-06 gnl|CDD|205076 pfam12796, Ank_2, Ankyrin repeats (3 copies).	-	4e-140 tr|C9SVS9|C9SVS9_VERA1 Predicted protein OS=Verticillium albo-atrum (strain VaMs.102 / ATCC MYA-4576 / FGSC 10136) GN=VDBG_09004 PE=4 SV=1	-	-
c1068_g1	2386.77	467.84	4305.7	9.20335	3.20216	8.67e-12	5.14e-11	22.96	211.05	-	-	4e-67 gnl|CDD|227563 COG5238, RNA1, Ran GTPase-activating protein (RanGAP) involved in mRNA processing and transport [Signal transduction mechanisms / RNA processing and modification].	6e-67 gnl|CDD|229848 KOG1909, KOG1909, KOG1909, Ran GTPase-activating protein [RNA processing and modification, Nuclear structure, Signal transduction mechanisms].	2e-136 gb|ELA34683.1| ran gtpase activating protein 1 [Colletotrichum gloeosporioides Nara gc5]	0.0 ref|XM_003656769.1| Thielavia terrestris NRRL 8126 hypothetical protein (THITE_2121985) mRNA, complete cds	-	2e-71 sp|P41391|RNA1_SCHPO Ran GTPase-activating protein 1 OS=Schizosaccharomyces pombe (strain 972 / ATCC 24843) GN=rna1 PE=1 SV=1	2e-136 tr|L2G9H5|L2G9H5_COLGN Ran gtpase activating protein 1 OS=Colletotrichum gloeosporioides (strain Nara gc5) GN=CGGC5_5528 PE=4 SV=1	GO:0030702,chromatin silencing at centromere;GO:0000070,mitotic sister chromatid segregation;GO:0005829,cytosol;GO:0046827,positive regulation of protein export from nucleus;GO:0031965,nuclear membrane;GO:0005098,Ran GTPase activator activity;GO:0048471,perinuclear region of cytoplasm;GO:0006913,nucleocytoplasmic transport;GO:0051383,kinetochore organization	K14319-ko03013,RNA transport
c1073_g1	36.4074	50.3933	22.4216	0.444933	-1.16834	0.000101103	0.000320992	3.64	1.63	-	-	-	-	0.0 gb|EGY15292.1| hypothetical protein VDAG_06146 [Verticillium dahliae VdLs.17]	0.0 ref|XM_002999776.1| Verticillium albo-atrum VaMs.102 predicted protein, mRNA	-	-	0.0 tr|G2X8K5|G2X8K5_VERDV Putative uncharacterized protein OS=Verticillium dahliae (strain VdLs.17 / ATCC MYA-4575 / FGSC 10137) GN=VDAG_06146 PE=4 SV=1	-	-
c108_g1	231.652	445.368	17.9373	0.403877	-1.30801	2.2e-148	6.39e-147	37.14	15	-	-	1e-80 gnl|CDD|214473 smart00020, Tryp_SPc, Trypsin-like serine protease. Many of these are synthesised as inactive precursor zymogens that are cleaved during limited proteolysis to generate their active forms. A few, however, are active as single chain molecules, and others are inactive due to substitutions of the catalytic triad residues.	1e-57 gnl|CDD|231561 KOG3627, KOG3627, KOG3627, Trypsin [Amino acid transport and metabolism].	2e-156 gb|AAR06593.1| extracellular trypsin protease [Verticillium dahliae] gb|EGY14486.1| trypsin [Verticillium dahliae VdLs.17]	0.0 ref|XM_003002187.1| Verticillium albo-atrum VaMs.102 trypsin, mRNA	1e-58 gnl|CDD|215708 pfam00089, Trypsin, Trypsin.	8e-76 sp|P35049|TRYP_FUSOX Trypsin OS=Fusarium oxysporum PE=1 SV=1	3e-156 tr|Q6V1Q1|Q6V1Q1_VERDA Extracellular trypsin protease OS=Verticillium dahliae GN=VTP1 PE=3 SV=1	GO:0005576,extracellular region;GO:0004252,serine-type endopeptidase activity;GO:0006508,proteolysis	K01312-ko04080,Neuroactive ligand-receptor interaction;ko04972,Pancreatic secretion;ko04974,Protein digestion and absorption;ko05164,Influenza A
c1080_g1	43.1092	58.5652	27.6533	0.47218	-1.08259	7.92e-05	0.000255267	2.92	1.38	-	-	9e-85 gnl|CDD|115279 pfam06609, TRI12, Fungal trichothecene efflux pump (TRI12). This family consists of several fungal specific trichothecene efflux pump proteins. Many of the genes involved in trichothecene toxin biosynthesis in Fusarium sporotrichioides are present within a gene cluster.It has been suggested that TRI12 may play a role in F. sporotrichioides self-protection against trichothecen…	2e-22 gnl|CDD|228203 KOG0254, KOG0254, KOG0254, Predicted transporter (major facilitator superfamily) [General function prediction only].	0.0 gb|ELA37437.1| trichothecene efflux pump [Colletotrichum gloeosporioides Nara gc5]	0.0 ref|XM_003007767.1| Verticillium albo-atrum VaMs.102 trichothecene efflux pump, mRNA	2e-85 gnl|CDD|115279 pfam06609, TRI12, Fungal trichothecene efflux pump (TRI12). This family consists of several fungal specific trichothecene efflux pump proteins. Many of the genes involved in trichothecene toxin biosynthesis in Fusarium sporotrichioides are present within a gene cluster.It has been suggested that TRI12 may play a role in F. sporotrichioides self-protection against trichothecen…	6e-21 sp|Q9HE13|YI32_SCHPO Uncharacterized MFS-type transporter C1399.02 OS=Schizosaccharomyces pombe (strain 972 / ATCC 24843) GN=SPAC1399.02 PE=3 SV=1	0.0 tr|L2GFQ0|L2GFQ0_COLGN Trichothecene efflux pump OS=Colletotrichum gloeosporioides (strain Nara gc5) GN=CGGC5_3183 PE=4 SV=1	GO:0005887,integral to plasma membrane;GO:0022857,transmembrane transporter activity	-
c1111_g1	398.58	555.007	242.153	0.436307	-1.19659	5.15e-40	8.17e-39	15.15	6.62	-	-	2e-46 gnl|CDD|220371 pfam09736, Bud13, Pre-mRNA-splicing factor of RES complex. This entry is characterized by proteins with alternating conserved and low-complexity regions. Bud13 together with Snu17p and a newly identified factor, Pml1p/Ylr016c, form a novel trimeric complex. called The RES complex, pre-mRNA retention and splicing complex. Subunits of this complex are not essential for viabilit…	2e-33 gnl|CDD|230593 KOG2654, KOG2654, KOG2654, Uncharacterized conserved protein [Function unknown].	0.0 gb|EGY20501.1| transcription initiation factor IIF subunit alpha [Verticillium dahliae VdLs.17]	0.0 ref|XM_003001228.1| Verticillium albo-atrum VaMs.102 transcription initiation factor IIF subunit alpha, mRNA	4e-47 gnl|CDD|220371 pfam09736, Bud13, Pre-mRNA-splicing factor of RES complex. This entry is characterized by proteins with alternating conserved and low-complexity regions. Bud13 together with Snu17p and a newly identified factor, Pml1p/Ylr016c, form a novel trimeric complex. called The RES complex, pre-mRNA retention and splicing complex. Subunits of this complex are not essential for viabilit…	2e-62 sp|Q52F10|CWC26_MAGO7 Pre-mRNA-splicing factor CWC26 OS=Magnaporthe oryzae (strain 70-15 / ATCC MYA-4617 / FGSC 8958) GN=CWC26 PE=3 SV=1	0.0 tr|G2XIZ8|G2XIZ8_VERDV Transcription initiation factor IIF subunit alpha OS=Verticillium dahliae (strain VdLs.17 / ATCC MYA-4575 / FGSC 10137) GN=VDAG_10130 PE=4 SV=1	GO:0003677,DNA binding;GO:0043581,mycelium development;GO:0005737,cytoplasm;GO:0045893,positive regulation of transcription, DNA-dependent;GO:0003743,translation initiation factor activity;GO:0005681,spliceosomal complex;GO:0006397,mRNA processing;GO:0005634,nucleus;GO:0003824,catalytic activity;GO:0008380,RNA splicing;GO:0006367,transcription initiation from RNA polymerase II promoter	K03138-ko03022,Basal transcription factors
c1126_g1	15.7368	6.8099	24.6638	3.62175	1.85669	0.000117457	0.000370437	0.63	2.28	-	-	-	-	-	-	-	-	-	-	-
c11263_g1	1932.8	1041.23	2824.37	2.71253	1.43964	0	0	24.02	65.24	VDBG_06210	hypothetical protein	-	-	0.0 ref|XP_003003768.1| conserved hypothetical protein [Verticillium alfalfae VaMs.102] gb|EEY20101.1| conserved hypothetical protein [Verticillium alfalfae VaMs.102]	0.0 ref|XM_003003722.1| Verticillium albo-atrum VaMs.102 conserved hypothetical protein, mRNA	-	-	0.0 tr|C9SMT6|C9SMT6_VERA1 Putative uncharacterized protein OS=Verticillium albo-atrum (strain VaMs.102 / ATCC MYA-4576 / FGSC 10136) GN=VDBG_06210 PE=4 SV=1	-	-
c1127_g1	12.5728	2.72396	22.4216	8.23125	3.04111	9.39e-07	3.61e-06	1.82	15.53	-	-	-	-	-	-	-	-	-	-	-
c11277_g1	3167.04	5312.4	1021.68	0.192319	-2.37842	0	0	228.96	44.15	-	-	3e-46 gnl|CDD|216469 pfam01384, PHO4, Phosphate transporter family. This family includes PHO-4 from Neurospora crassa which is a is a Na(+)-phosphate symporter. This family also contains the leukaemia virus receptor.	5e-44 gnl|CDD|230432 KOG2493, KOG2493, KOG2493, Na+/Pi symporter [Inorganic ion transport and metabolism].	0.0 gb|EGY16419.1| phosphate-repressible phosphate permease [Verticillium dahliae VdLs.17]	0.0 ref|XM_003004485.1| Verticillium albo-atrum VaMs.102 phosphate transporter family protein, mRNA	6e-47 gnl|CDD|216469 pfam01384, PHO4, Phosphate transporter family. This family includes PHO-4 from Neurospora crassa which is a is a Na(+)-phosphate symporter. This family also contains the leukaemia virus receptor.	1e-86 sp|P15710|PHO4_NEUCR Phosphate-repressible phosphate permease OS=Neurospora crassa (strain ATCC 24698 / 74-OR23-1A / CBS 708.71 / DSM 1257 / FGSC 987) GN=pho-4 PE=3 SV=1	0.0 tr|G2XC05|G2XC05_VERDV Phosphate-repressible phosphate permease OS=Verticillium dahliae (strain VdLs.17 / ATCC MYA-4575 / FGSC 10137) GN=VDAG_07583 PE=4 SV=1	GO:0016020,membrane;GO:0015293,symporter activity;GO:0016021,integral to membrane;GO:0006817,phosphate ion transport;GO:0005315,inorganic phosphate transmembrane transporter activity	K14640
c1128_g1	46.2154	71.504	20.9268	0.292667	-1.77267	2.38e-10	1.19e-09	2.26	0.66	-	-	1e-46 gnl|CDD|213391 cd12148, fungal_TF_MHR, fungal transcription factor regulatory middle homology region. This domain is present in the large family of fungal zinc cluster transcription factors that contain an N-terminal GAL4-like C6 zinc binuclear cluster DNA-binding domain. Examples of members of this large fungal group are the following Saccharomyces cerevisiae transcription factors, GAL4, S…	-	0.0 gb|EQB51251.1| hypothetical protein CGLO_09220 [Colletotrichum gloeosporioides Cg-14]	0.0 ref|XM_003000610.1| Verticillium albo-atrum VaMs.102 conserved hypothetical protein, mRNA	1e-23 gnl|CDD|217880 pfam04082, Fungal_trans, Fungal specific transcription factor domain.	9e-10 sp|O59744|YN28_SCHPO Uncharacterized transcriptional regulatory protein C530.08 OS=Schizosaccharomyces pombe (strain 972 / ATCC 24843) GN=SPBC530.08 PE=4 SV=1	0.0 tr|N4VM32|N4VM32_COLOR C6 transcription factor OS=Colletotrichum orbiculare (strain 104-T / ATCC 96160 / CBS 514.97 / LARS 414 / MAFF 240422) GN=Cob_02907 PE=4 SV=1	GO:0016020,membrane;GO:0005829,cytosol;GO:0008270,zinc ion binding;GO:0016021,integral to membrane;GO:0000978,RNA polymerase II core promoter proximal region sequence-specific DNA binding;GO:0005634,nucleus;GO:0031965,nuclear membrane;GO:0000785,chromatin;GO:0000982,RNA polymerase II core promoter proximal region sequence-specific DNA binding transcription factor activity;GO:0046872,metal ion bin…	-
c11285_g1	1482.41	567.946	2396.87	4.22024	2.07733	0	0	9.67	40.85	-	-	0.0 gnl|CDD|233980 TIGR02712, urea_carbox, urea carboxylase. Members of this family are ATP-dependent urea carboxylase, including characterized members from Oleomonas sagaranensis (alpha class Proteobacterium) and yeasts such as Saccharomyces cerevisiae. The allophanate hydrolase domain of the yeast enzyme is not included in this model and is represented by an adjacent gene in Oleomonas sagaranen…	0.0 gnl|CDD|228187 KOG0238, KOG0238, KOG0238, 3-Methylcrotonyl-CoA carboxylase, biotin-containing subunit/Propionyl-CoA carboxylase, alpha chain/Acetyl-CoA carboxylase, biotin carboxylase subunit [Lipid transport and metabolism, Amino acid transport and metabolism].	0.0 gb|EGY15760.1| urea amidolyase [Verticillium dahliae VdLs.17]	0.0 ref|XM_003004114.1| Verticillium albo-atrum VaMs.102 urea amidolyase, mRNA	3e-92 gnl|CDD|217152 pfam02626, AHS2, Allophanate hydrolase subunit 2. This domain forms the second subunit of allophanate hydrolase. In yeast urea amidolyase this domain is found between pfam00289 and pfam00364.	0.0 sp|A5H0J2|DUR1_LACKL Urea amidolyase OS=Lachancea kluyveri GN=DUR1,2 PE=3 SV=1	0.0 tr|G2XA21|G2XA21_VERDV Urea amidolyase OS=Verticillium dahliae (strain VdLs.17 / ATCC MYA-4575 / FGSC 10137) GN=VDAG_06924 PE=4 SV=1	GO:0003755,peptidyl-prolyl cis-trans isomerase activity;GO:0005524,ATP binding;GO:0006525,arginine metabolic process;GO:0016829,lyase activity;GO:0000413,protein peptidyl-prolyl isomerization;GO:0016884,carbon-nitrogen ligase activity, with glutamine as amido-N-donor;GO:0043419,urea catabolic process;GO:0004039,allophanate hydrolase activity;GO:0006457,protein folding;GO:0004075,biotin carboxylas…	K14541-ko00330,Arginine and proline metabolism;ko00791,Atrazine degradation
c11291_g1	746.278	459.668	1032.89	2.24703	1.16802	1.03e-11	6.03e-11	10.96	24.68	-	-	1e-27 gnl|CDD|219349 pfam07250, Glyoxal_oxid_N, Glyoxal oxidase N-terminus. This family represents the N-terminus (approximately 300 residues) of a number of plant and fungal glyoxal oxidase enzymes. Glyoxal oxidase catalyzes the oxidation of aldehydes to carboxylic acids, coupled with reduction of dioxygen to hydrogen peroxide. It is an essential component of the extracellular lignin degradation…	2e-16 gnl|CDD|232087 KOG4157, KOG4157, KOG4157, beta-1,6-N-acetylglucosaminyltransferase, contains WSC domain [Carbohydrate transport and metabolism, Posttranslational modification, protein turnover, chaperones].	0.0 gb|EGY18396.1| WSC domain-containing protein [Verticillium dahliae VdLs.17]	0.0 ref|XM_003004862.1| Verticillium albo-atrum VaMs.102 WSC domain-containing protein, mRNA	2e-28 gnl|CDD|219349 pfam07250, Glyoxal_oxid_N, Glyoxal oxidase N-terminus. This family represents the N-terminus (approximately 300 residues) of a number of plant and fungal glyoxal oxidase enzymes. Glyoxal oxidase catalyzes the oxidation of aldehydes to carboxylic acids, coupled with reduction of dioxygen to hydrogen peroxide. It is an essential component of the extracellular lignin degradation…	1e-29 sp|P84675|PFM_CHAGB Putative fungistatic metabolite OS=Chaetomium globosum (strain ATCC 6205 / CBS 148.51 / DSM 1962 / NBRC 6347 / NRRL 1970) GN=CHGG_05463 PE=1 SV=2	0.0 tr|G2XEZ8|G2XEZ8_VERDV WSC domain-containing protein OS=Verticillium dahliae (strain VdLs.17 / ATCC MYA-4575 / FGSC 10137) GN=VDAG_08730 PE=4 SV=1	GO:0050832,defense response to fungus;GO:0031640,killing of cells of other organism	-
c11292_g1	2059.6	456.263	3662.94	8.02813	3.00506	1.08e-11	6.35e-11	17.7	142.47	-	-	3e-27 gnl|CDD|227625 COG5309, COG5309, Exo-beta-1,3-glucanase [Carbohydrate transport and metabolism].	-	0.0 gb|EGY13829.1| glucan 1,3-beta-glucosidase [Verticillium dahliae VdLs.17]	0.0 ref|XM_003009173.1| Verticillium albo-atrum VaMs.102 glucan 1,3-beta-glucosidase, mRNA	-	2e-98 sp|B0XXF8|EGLC_ASPFC Probable glucan endo-1,3-beta-glucosidase eglC OS=Neosartorya fumigata (strain CEA10 / CBS 144.89 / FGSC A1163) GN=eglC PE=3 SV=1	0.0 tr|G2WQ69|G2WQ69_VERDV Glucan 1,3-beta-glucosidase OS=Verticillium dahliae (strain VdLs.17 / ATCC MYA-4575 / FGSC 10137) GN=VDAG_00511 PE=4 SV=1	GO:0031225,anchored to membrane;GO:0004553,hydrolase activity, hydrolyzing O-glycosyl compounds;GO:0005975,carbohydrate metabolic process;GO:0000272,polysaccharide catabolic process;GO:0005576,extracellular region;GO:0005886,plasma membrane;GO:0042973,glucan endo-1,3-beta-D-glucosidase activity;GO:0043169,cation binding;GO:0005618,cell wall	K01199-ko00500,Starch and sucrose metabolism
c11298_g2	36954.8	55831	18078.5	0.323808	-1.62679	0	0	2151.27	698.29	-	-	7e-57 gnl|CDD|225646 COG3104, PTR2, Dipeptide/tripeptide permease [Amino acid transport and metabolism].	2e-47 gnl|CDD|229179 KOG1237, KOG1237, KOG1237, H+/oligopeptide symporter [Amino acid transport and metabolism].	0.0 gb|EGY15322.1| peptide transporter PTR2-A [Verticillium dahliae VdLs.17]	0.0 ref|XM_002999805.1| Verticillium albo-atrum VaMs.102 peptide transporter PTR2-A, mRNA	2e-27 gnl|CDD|216153 pfam00854, PTR2, POT family. The POT (proton-dependent oligopeptide transport) family all appear to be proton dependent transporters.	8e-108 sp|Q9P380|PTR2_SCHPO Probable peptide transporter ptr2 OS=Schizosaccharomyces pombe (strain 972 / ATCC 24843) GN=ptr2 PE=1 SV=1	0.0 tr|G2X8N5|G2X8N5_VERDV Peptide transporter PTR2-A OS=Verticillium dahliae (strain VdLs.17 / ATCC MYA-4575 / FGSC 10137) GN=VDAG_06176 PE=4 SV=1	GO:0016020,membrane;GO:0042936,dipeptide transporter activity;GO:0005887,integral to plasma membrane;GO:0035443,tripeptide transmembrane transport;GO:0015031,protein transport;GO:0042937,tripeptide transporter activity;GO:0000324,fungal-type vacuole;GO:0035442,dipeptide transmembrane transport;GO:0005215,transporter activity	K03305
c11301_g1	4261.8	6182.03	2341.56	0.378769	-1.40061	0	0	170.95	64.86	-	-	8e-46 gnl|CDD|218329 pfam04922, DIE2_ALG10, DIE2/ALG10 family. The ALG10 protein from Saccharomyces cerevisiae encodes the alpha-1,2 glucosyltransferase of the endoplasmic reticulum. This protein has been characterized in rat as potassium channel regulator 1.	9e-44 gnl|CDD|230581 KOG2642, KOG2642, KOG2642, Alpha-1,2 glucosyltransferase/transcriptional activator [Posttranslational modification, protein turnover, chaperones, Transcription, Lipid transport and metabolism, Signal transduction mechanisms].	0.0 gb|EGY16729.1| alpha-1,2 glucosyltransferase ALG10 [Verticillium dahliae VdLs.17]	0.0 ref|XM_003009625.1| Verticillium albo-atrum VaMs.102 alpha-1,2 glucosyltransferase ALG10, mRNA	2e-46 gnl|CDD|218329 pfam04922, DIE2_ALG10, DIE2/ALG10 family. The ALG10 protein from Saccharomyces cerevisiae encodes the alpha-1,2 glucosyltransferase of the endoplasmic reticulum. This protein has been characterized in rat as potassium channel regulator 1.	2e-180 sp|Q4HZE0|ALG10_GIBZE Dol-P-Glc:Glc(2)Man(9)GlcNAc(2)-PP-Dol alpha-1,2-glucosyltransferase OS=Gibberella zeae (strain PH-1 / ATCC MYA-4620 / FGSC 9075 / NRRL 31084) GN=ALG10 PE=3 SV=1	0.0 tr|G2XCL1|G2XCL1_VERDV Alpha-1,2 glucosyltransferase ALG10 OS=Verticillium dahliae (strain VdLs.17 / ATCC MYA-4575 / FGSC 10137) GN=VDAG_07893 PE=4 SV=1	GO:0006486,protein glycosylation;GO:0016758,transferase activity, transferring hexosyl groups;GO:0016021,integral to membrane;GO:0005789,endoplasmic reticulum membrane	K03850-ko00510,N-Glycan biosynthesis
c11304_g1	2118.8	2837.01	1400.6	0.493691	-1.01832	2.04e-152	6.01e-151	445.19	221.98	-	-	-	-	2e-07 gb|EGY17821.1| hypothetical protein VDAG_01503 [Verticillium dahliae VdLs.17]	-	-	-	2e-07 tr|G2WUN0|G2WUN0_VERDV Putative uncharacterized protein OS=Verticillium dahliae (strain VdLs.17 / ATCC MYA-4575 / FGSC 10137) GN=VDAG_01503 PE=4 SV=1	-	-
c11308_g2	1120.17	302.36	1937.97	6.4095	2.68021	8.07e-12	4.82e-11	54.85	355.62	-	-	-	-	-	-	-	-	-	-	-
c1131_g1	48.192	76.9519	19.4321	0.252522	-1.98552	1.28e-12	8.34e-12	4.05	1.03	-	-	2e-54 gnl|CDD|218645 pfam05577, Peptidase_S28, Serine carboxypeptidase S28. These serine proteases include several eukaryotic enzymes such as lysosomal Pro-X carboxypeptidase, dipeptidyl-peptidase II, and thymus-specific serine peptidase.	1e-51 gnl|CDD|230121 KOG2182, KOG2182, KOG2182, Hydrolytic enzymes of the alpha/beta hydrolase fold [Posttranslational modification, protein turnover, chaperones, General function prediction only].	0.0 gb|EGY22115.1| thymus-specific serine protease [Verticillium dahliae VdLs.17]	0.0 ref|XM_003003916.1| Verticillium albo-atrum VaMs.102 thymus-specific serine protease, mRNA	3e-55 gnl|CDD|218645 pfam05577, Peptidase_S28, Serine carboxypeptidase S28. These serine proteases include several eukaryotic enzymes such as lysosomal Pro-X carboxypeptidase, dipeptidyl-peptidase II, and thymus-specific serine peptidase.	6e-29 sp|Q1PF50|EDA2_ARATH Probable serine protease EDA2 OS=Arabidopsis thaliana GN=EDA2 PE=2 SV=2	0.0 tr|G2WZW3|G2WZW3_VERDV Thymus-specific serine protease OS=Verticillium dahliae (strain VdLs.17 / ATCC MYA-4575 / FGSC 10137) GN=VDAG_03555 PE=4 SV=1	GO:0008236,serine-type peptidase activity;GO:0009561,megagametogenesis;GO:0005576,extracellular region;GO:0006508,proteolysis	-
c11310_g1	67032.3	96648.8	37415.7	0.38713	-1.36911	0	0	3960.6	1537.24	-	-	-	-	8e-112 gb|EGY18349.1| GTP-binding protein EsdC [Verticillium dahliae VdLs.17]	0.0 ref|XM_003008660.1| Verticillium albo-atrum VaMs.102 GTP-binding protein EsdC, mRNA	-	-	9e-112 tr|G2XEU8|G2XEU8_VERDV GTP-binding protein EsdC OS=Verticillium dahliae (strain VdLs.17 / ATCC MYA-4575 / FGSC 10137) GN=VDAG_08683 PE=4 SV=1	-	-
c11315_g1	216.501	296.231	136.772	0.461707	-1.11495	6.4e-20	6.1e-19	12.26	5.68	-	-	1e-16 gnl|CDD|221626 pfam12537, DUF3735, Protein of unknown function (DUF3735). This domain family is found in eukaryotes, and is approximately 70 amino acids in length. There is a conserved LSG sequence motif. There is a single completely conserved residue G that may be functionally important.	2e-21 gnl|CDD|230356 KOG2417, KOG2417, KOG2417, Predicted G-protein coupled receptor [Signal transduction mechanisms].	0.0 gb|EGY20719.1| hypothetical protein VDAG_10279 [Verticillium dahliae VdLs.17]	0.0 ref|XM_003003334.1| Verticillium albo-atrum VaMs.102 conserved hypothetical protein, mRNA	2e-17 gnl|CDD|221626 pfam12537, DUF3735, Protein of unknown function (DUF3735). This domain family is found in eukaryotes, and is approximately 70 amino acids in length. There is a conserved LSG sequence motif. There is a single completely conserved residue G that may be functionally important.	6e-14 sp|Q6DDW6|GPHR_XENLA Golgi pH regulator OS=Xenopus laevis GN=gpr89-b PE=2 SV=1	0.0 tr|G2XJL6|G2XJL6_VERDV Putative uncharacterized protein OS=Verticillium dahliae (strain VdLs.17 / ATCC MYA-4575 / FGSC 10137) GN=VDAG_10279 PE=4 SV=1	GO:0000139,Golgi membrane;GO:0016021,integral to membrane;GO:0015031,protein transport;GO:0005244,voltage-gated ion channel activity	-
c11325_g2	469.336	667.37	271.301	0.406523	-1.29859	4.79e-54	9.07e-53	71.74	29.36	-	-	-	-	2e-21 gb|EGY22417.1| hypothetical protein VDAG_03855 [Verticillium dahliae VdLs.17]	6e-128 ref|XM_003006763.1| Verticillium albo-atrum VaMs.102 predicted protein, mRNA	-	-	3e-21 tr|G2X0S6|G2X0S6_VERDV Putative uncharacterized protein OS=Verticillium dahliae (strain VdLs.17 / ATCC MYA-4575 / FGSC 10137) GN=VDAG_03855 PE=4 SV=1	-	-
c11329_g1	2209.81	1008.55	3411.07	3.38217	1.75795	0	0	53.36	181.06	-	-	1e-156 gnl|CDD|234071 TIGR02961, allantoicase, allantoicase. Members of this family are the enzyme allantoicase (EC 3.5.3.4), also called allantoate amidinohydrolase. This enzyme hydrolyzes allantoate to (S)-ureidoglycolate and urea; it can also degrade (R)-ureidoglycolate to glyoxylate and urea. Allantoinase (EC 3.5.2.5) hydrolyzes (S)-allantoin (a xanthine metabolite, via urate) to allantoate. …	1e-132 gnl|CDD|232076 KOG4145, KOG4145, KOG4145, Allantoicase [Nucleotide transport and metabolism].	0.0 gb|EGY22472.1| allantoicase [Verticillium dahliae VdLs.17]	0.0 ref|XM_003006814.1| Verticillium albo-atrum VaMs.102 allantoicase, mRNA	2e-66 gnl|CDD|217615 pfam03561, Allantoicase, Allantoicase repeat. This family is found in pairs in Allantoicases, forming the majority of the protein. These proteins allow the use of purines as secondary nitrogen sources in nitrogen-limiting conditions through the reaction: allantoate + H(2)0 = (-)-ureidoglycolate + urea.	0.0 sp|P18407|ALLC_NEUCR Allantoicase OS=Neurospora crassa (strain ATCC 24698 / 74-OR23-1A / CBS 708.71 / DSM 1257 / FGSC 987) GN=alc-1 PE=2 SV=2	0.0 tr|G2X0Y1|G2X0Y1_VERDV Allantoicase OS=Verticillium dahliae (strain VdLs.17 / ATCC MYA-4575 / FGSC 10137) GN=VDAG_03910 PE=4 SV=1	GO:0000256,allantoin catabolic process;GO:0006144,purine nucleobase metabolic process;GO:0004037,allantoicase activity	K01477-ko00230,Purine metabolism
c11336_g1	3382	841.704	5922.29	7.03608	2.81477	0	0	64.93	459.11	-	-	3e-26 gnl|CDD|240714 cd12268, RRM_Vip1, RNA recognition motif in fission yeast protein Vip1 and similar proteins. This subfamily corresponds to Vip1, an RNA-binding protein encoded by gene vip1 from fission yeast Schizosaccharomyces pombe. Its biological role remains unclear. Vip1 contains an N-terminal RNA recognition motif (RRM), also termed RBD (RNA binding domain) or RNP (ribonucleoprotein do…	-	0.0 gb|EGY16183.1| vip1 [Verticillium dahliae VdLs.17]	0.0 ref|XM_003000643.1| Verticillium albo-atrum VaMs.102 vip1, mRNA	-	2e-41 sp|P87216|VIPI_SCHPO Protein vip1 OS=Schizosaccharomyces pombe (strain 972 / ATCC 24843) GN=vip1 PE=1 SV=1	0.0 tr|G2XAW8|G2XAW8_VERDV Vip1 OS=Verticillium dahliae (strain VdLs.17 / ATCC MYA-4575 / FGSC 10137) GN=VDAG_07347 PE=4 SV=1	GO:0033554,cellular response to stress;GO:0003723,RNA binding;GO:0000166,nucleotide binding;GO:0005829,cytosol;GO:0003676,nucleic acid binding	-
c11341_g1	138.135	64.0131	212.258	3.31585	1.72938	0	0	2.49	8.28	-	-	7e-75 gnl|CDD|215702 pfam00083, Sugar_tr, Sugar (and other) transporter.	6e-76 gnl|CDD|228203 KOG0254, KOG0254, KOG0254, Predicted transporter (major facilitator superfamily) [General function prediction only].	0.0 gb|EGY23085.1| sugar transport protein [Verticillium dahliae VdLs.17]	0.0 ref|XM_003005324.1| Verticillium albo-atrum VaMs.102 ATINT2, mRNA	1e-75 gnl|CDD|215702 pfam00083, Sugar_tr, Sugar (and other) transporter.	2e-41 sp|P49374|HGT1_KLULA High-affinity glucose transporter OS=Kluyveromyces lactis (strain ATCC 8585 / CBS 2359 / DSM 70799 / NBRC 1267 / NRRL Y-1140 / WM37) GN=HGT1 PE=3 SV=1	0.0 tr|G2X2J9|G2X2J9_VERDV Sugar transport protein OS=Verticillium dahliae (strain VdLs.17 / ATCC MYA-4575 / FGSC 10137) GN=VDAG_04523 PE=3 SV=1	GO:0016021,integral to membrane;GO:0022891,substrate-specific transmembrane transporter activity;GO:0008643,carbohydrate transport	-
c11348_g1	1606.28	2342.61	869.958	0.371363	-1.4291	7.93e-214	2.53e-212	98.75	36.77	-	-	3e-54 gnl|CDD|213391 cd12148, fungal_TF_MHR, fungal transcription factor regulatory middle homology region. This domain is present in the large family of fungal zinc cluster transcription factors that contain an N-terminal GAL4-like C6 zinc binuclear cluster DNA-binding domain. Examples of members of this large fungal group are the following Saccharomyces cerevisiae transcription factors, GAL4, S…	-	0.0 gb|EGY13619.1| transcriptional activator protein acu-15 [Verticillium dahliae VdLs.17]	0.0 ref|XM_003008958.1| Verticillium albo-atrum VaMs.102 transcriptional activator protein acu-15, mRNA	1e-33 gnl|CDD|217880 pfam04082, Fungal_trans, Fungal specific transcription factor domain.	0.0 sp|P87000|ACU15_NEUCR Transcriptional activator protein acu-15 OS=Neurospora crassa (strain ATCC 24698 / 74-OR23-1A / CBS 708.71 / DSM 1257 / FGSC 987) GN=acu-15 PE=1 SV=2	0.0 tr|G2WRW8|G2WRW8_VERDV Transcriptional activator protein acu-15 OS=Verticillium dahliae (strain VdLs.17 / ATCC MYA-4575 / FGSC 10137) GN=VDAG_00301 PE=4 SV=1	GO:0000981,sequence-specific DNA binding RNA polymerase II transcription factor activity;GO:0003677,DNA binding;GO:0006357,regulation of transcription from RNA polymerase II promoter;GO:0008270,zinc ion binding;GO:0005634,nucleus;GO:0006366,transcription from RNA polymerase II promoter;GO:0046872,metal ion binding	-
c11362_g1	394.796	632.64	156.951	0.248089	-2.01107	1.82e-94	4.47e-93	105.05	26.34	-	-	1e-13 gnl|CDD|214884 smart00886, Dabb, Stress responsive A/B Barrel Domain. The function of this domain is unknown, but it is upregulated in response to salt stress in Populus balsamifera (balsam poplar). It is also found at the C-terminus of a fructose 1,6-bisphosphate aldolase from Hydrogenophilus thermoluteolus.It is found in the pA01 plasmid, which encodes genes for molybdopterin uptake and d…	-	6e-72 gb|EGY19535.1| hypothetical protein VDAG_09869 [Verticillium dahliae VdLs.17]	-	5e-12 gnl|CDD|219615 pfam07876, Dabb, Stress responsive A/B Barrel Domain. The function of this family is unknown, but it is upregulated in response to salt stress in Populus balsamifera. It is also found at the C-terminus of an fructose 1,6-bisphosphate aldolase from Hydrogenophilus thermoluteolus. Arthrobacter nicotinovorans ORF106 is found in the pA01 plasmid, which encodes genes for molybdopt…	-	7e-72 tr|G2XI87|G2XI87_VERDV Putative uncharacterized protein OS=Verticillium dahliae (strain VdLs.17 / ATCC MYA-4575 / FGSC 10137) GN=VDAG_09869 PE=4 SV=1	-	-
c11373_g1	424.182	244.475	603.889	2.47014	1.30459	5.58e-12	3.41e-11	9.03	22.37	-	-	-	-	7e-79 gb|EGY22758.1| hypothetical protein VDAG_04196 [Verticillium dahliae VdLs.17]	0.0 ref|XM_003005000.1| Verticillium albo-atrum VaMs.102 conserved hypothetical protein, mRNA	-	-	9e-79 tr|G2X302|G2X302_VERDV Putative uncharacterized protein OS=Verticillium dahliae (strain VdLs.17 / ATCC MYA-4575 / FGSC 10137) GN=VDAG_04196 PE=4 SV=1	-	-
c11386_g1	327.808	458.306	197.31	0.43052	-1.21585	3.87e-34	5.45e-33	28.46	12.3	-	-	-	-	1e-167 gb|EGY22104.1| hypothetical protein VDAG_03544 [Verticillium dahliae VdLs.17]	0.0 ref|XM_003003906.1| Verticillium albo-atrum VaMs.102 conserved hypothetical protein, mRNA	-	-	1e-167 tr|G2WZV2|G2WZV2_VERDV Putative uncharacterized protein OS=Verticillium dahliae (strain VdLs.17 / ATCC MYA-4575 / FGSC 10137) GN=VDAG_03544 PE=4 SV=1	-	-
c11399_g1	3493.89	4870.44	2117.35	0.434734	-1.20179	0	0	233.01	101.6	-	-	2e-75 gnl|CDD|215702 pfam00083, Sugar_tr, Sugar (and other) transporter.	1e-65 gnl|CDD|228203 KOG0254, KOG0254, KOG0254, Predicted transporter (major facilitator superfamily) [General function prediction only].	0.0 gb|EGY15384.1| lactose permease [Verticillium dahliae VdLs.17]	0.0 ref|XM_002999859.1| Verticillium albo-atrum VaMs.102 lactose permease, mRNA	5e-76 gnl|CDD|215702 pfam00083, Sugar_tr, Sugar (and other) transporter.	7e-80 sp|P07921|LACP_KLULA Lactose permease OS=Kluyveromyces lactis (strain ATCC 8585 / CBS 2359 / DSM 70799 / NBRC 1267 / NRRL Y-1140 / WM37) GN=LAC12 PE=3 SV=1	0.0 tr|G2X8U7|G2X8U7_VERDV Lactose permease OS=Verticillium dahliae (strain VdLs.17 / ATCC MYA-4575 / FGSC 10137) GN=VDAG_06238 PE=3 SV=1	GO:0015293,symporter activity;GO:0016021,integral to membrane;GO:0022891,substrate-specific transmembrane transporter activity;GO:0008643,carbohydrate transport	-
c11408_g1	254.795	93.2957	416.294	4.4621	2.15772	1.13e-12	7.39e-12	9.31	41.8	-	-	-	-	-	-	-	-	-	-	-
c11409_g1	356.207	98.0626	614.352	6.2649	2.64729	1.1e-12	7.21e-12	3.14	19.7	-	-	1e-134 gnl|CDD|215456 PLN02850, PLN02850, aspartate-tRNA ligase.	3e-135 gnl|CDD|228504 KOG0556, KOG0556, KOG0556, Aspartyl-tRNA synthetase [Translation, ribosomal structure and biogenesis].	0.0 gb|EGY20025.1| aspartyl-tRNA synthetase [Verticillium dahliae VdLs.17]	0.0 ref|XM_003006949.1| Verticillium albo-atrum VaMs.102 aspartyl-tRNA synthetase, mRNA	4e-70 gnl|CDD|215753 pfam00152, tRNA-synt_2, tRNA synthetases class II (D, K and N).	1e-105 sp|P04802|SYDC_YEAST Aspartate--tRNA ligase, cytoplasmic OS=Saccharomyces cerevisiae (strain ATCC 204508 / S288c) GN=DPS1 PE=1 SV=3	0.0 tr|G2WWQ5|G2WWQ5_VERDV Aspartyl-tRNA synthetase OS=Verticillium dahliae (strain VdLs.17 / ATCC MYA-4575 / FGSC 10137) GN=VDAG_02041 PE=3 SV=1	GO:0003723,RNA binding;GO:0005524,ATP binding;GO:0004815,aspartate-tRNA ligase activity;GO:0005737,cytoplasm;GO:0006422,aspartyl-tRNA aminoacylation;GO:0005634,nucleus;GO:0002181,cytoplasmic translation;GO:0003676,nucleic acid binding	K01876-ko00970,Aminoacyl-tRNA biosynthesis
c1142_g1	15.2474	24.5156	5.97909	0.243889	-2.0357	5.78e-05	0.000189165	1.33	0.32	VDBG_00369	hypothetical protein	-	-	4e-107 ref|XP_003008688.1| conserved hypothetical protein [Verticillium alfalfae VaMs.102] gb|EEY14262.1| conserved hypothetical protein [Verticillium alfalfae VaMs.102]	0.0 ref|XM_003008642.1| Verticillium albo-atrum VaMs.102 conserved hypothetical protein, mRNA	-	-	5e-107 tr|C9S5N6|C9S5N6_VERA1 Putative uncharacterized protein OS=Verticillium albo-atrum (strain VaMs.102 / ATCC MYA-4576 / FGSC 10136) GN=VDBG_00369 PE=4 SV=1	-	-
c11432_g1	2758.25	1662.98	3853.53	2.31724	1.21241	4.56e-11	2.48e-10	50.22	116.6	-	-	6e-163 gnl|CDD|233287 TIGR01137, cysta_beta, cystathionine beta-synthase. Members of this family closely resemble cysteine synthase but contain an additional C-terminal CBS domain. The function of any bacterial member included in this family is proposed but not proven [Amino acid biosynthesis, Serine family].	8e-104 gnl|CDD|229194 KOG1252, KOG1252, KOG1252, Cystathionine beta-synthase and related enzymes [Amino acid transport and metabolism].	0.0 gb|EQB53574.1| cystathionine beta-synthase [Colletotrichum gloeosporioides Cg-14]	0.0 ref|XM_003006565.1| Verticillium albo-atrum VaMs.102 conserved hypothetical protein, mRNA	1e-48 gnl|CDD|215840 pfam00291, PALP, Pyridoxal-phosphate dependent enzyme. Members of this family are all pyridoxal-phosphate dependent enzymes. This family includes: serine dehydratase EC:4.2.1.13 P20132, threonine dehydratase EC:4.2.1.16, tryptophan synthase beta chain EC:4.2.1.20, threonine synthase EC:4.2.99.2, cysteine synthase EC:4.2.99.8 P11096, cystathionine beta-synthase EC:4.2.1.22, 1-…	2e-133 sp|P32582|CBS_YEAST Cystathionine beta-synthase OS=Saccharomyces cerevisiae (strain ATCC 204508 / S288c) GN=CYS4 PE=1 SV=1	0.0 tr|E3QPV7|E3QPV7_COLGM Cystathionine beta-synthase OS=Colletotrichum graminicola (strain M1.001 / M2 / FGSC 10212) GN=GLRG_08028 PE=4 SV=1	GO:0019346,transsulfuration;GO:0005737,cytoplasm;GO:0019343,cysteine biosynthetic process via cystathionine;GO:0070814,hydrogen sulfide biosynthetic process;GO:0005739,mitochondrion;GO:0007089,traversing start control point of mitotic cell cycle;GO:0006535,cysteine biosynthetic process from serine;GO:0004122,cystathionine beta-synthase activity	K01697-ko01230,Biosynthesis of amino acids;ko00260,Glycine, serine and threonine metabolism;ko00270,Cysteine and methionine metabolism
c11434_g1	342.805	143.008	542.603	3.79421	1.9238	5.44e-13	3.66e-12	10.06	38.35	-	-	1e-137 gnl|CDD|238958 cd02000, TPP_E1_PDC_ADC_BCADC, Thiamine pyrophosphate (TPP) family, E1 of PDC_ADC_BCADC subfamily, TPP-binding module; composed of proteins similar to the E1 components of the human pyruvate dehydrogenase complex (PDC), the acetoin dehydrogenase complex (ADC) and the branched chain alpha-keto acid dehydrogenase/2-oxoisovalerate dehydrogenase complex (BCADC). PDC catalyzes th…	0.0 gnl|CDD|229124 KOG1182, KOG1182, KOG1182, Branched chain alpha-keto acid dehydrogenase complex, alpha subunit [Energy production and conversion].	0.0 gb|EQB52585.1| dehydrogenase E1 component [Colletotrichum gloeosporioides Cg-14]	0.0 ref|XM_003001604.1| Verticillium albo-atrum VaMs.102 2-oxoisovalerate dehydrogenase subunit alpha, mRNA	9e-89 gnl|CDD|201386 pfam00676, E1_dh, Dehydrogenase E1 component. This family uses thiamine pyrophosphate as a cofactor. This family includes pyruvate dehydrogenase, 2-oxoglutarate dehydrogenase and 2-oxoisovalerate dehydrogenase.	3e-141 sp|O45924|ODBA_CAEEL 2-oxoisovalerate dehydrogenase subunit alpha, mitochondrial OS=Caenorhabditis elegans GN=Y39E4A.3 PE=1 SV=2	0.0 tr|N4VGM5|N4VGM5_COLOR 2-oxoisovalerate dehydrogenase alpha subunit OS=Colletotrichum orbiculare (strain 104-T / ATCC 96160 / CBS 514.97 / LARS 414 / MAFF 240422) GN=Cob_09852 PE=4 SV=1	GO:0016624,oxidoreductase activity, acting on the aldehyde or oxo group of donors, disulfide as acceptor	K00166-ko00280,Valine, leucine and isoleucine degradation
c11437_g1	1344.7	824.679	1864.73	2.26116	1.17706	0	0	87.52	199.23	VDBG_02162	superoxide dismutase	9e-59 gnl|CDD|238186 cd00305, Cu-Zn_Superoxide_Dismutase, Copper/zinc superoxide dismutase (SOD). superoxide dismutases catalyse the conversion of superoxide radicals to molecular oxygen. Three evolutionarily distinct families of SODs are known, of which the copper/zinc-binding family is one. Defects in the human SOD1 gene causes familial amyotrophic lateral sclerosis (Lou Gehrig's disease). Cyto…	4e-68 gnl|CDD|228390 KOG0441, KOG0441, KOG0441, Cu2+/Zn2+ superoxide dismutase SOD1 [Inorganic ion transport and metabolism].	1e-96 ref|XP_003007974.1| superoxide dismutase [Verticillium alfalfae VaMs.102] gb|EEY16053.1| superoxide dismutase [Verticillium alfalfae VaMs.102]	0.0 ref|XM_003007928.1| Verticillium albo-atrum VaMs.102 superoxide dismutase, mRNA	1e-54 gnl|CDD|215700 pfam00080, Sod_Cu, Copper/zinc superoxide dismutase (SODC). superoxide dismutases (SODs) catalyze the conversion of superoxide radicals to hydrogen peroxide and molecular oxygen. Three evolutionarily distinct families of SODs are known, of which the copper/zinc-binding family is one. Defects in the human SOD1 gene cause familial amyotrophic lateral sclerosis (Lou Gehrig's dis…	1e-83 sp|Q8J0N2|SODC_CORMI Superoxide dismutase [Cu-Zn] OS=Cordyceps militaris GN=SOD1 PE=2 SV=3	1e-96 tr|C9S9J0|C9S9J0_VERA1 Superoxide dismutase [Cu-Zn] OS=Verticillium albo-atrum (strain VaMs.102 / ATCC MYA-4576 / FGSC 10136) GN=VDBG_02162 PE=3 SV=1	GO:0006801,superoxide metabolic process;GO:0005737,cytoplasm;GO:0004784,superoxide dismutase activity;GO:0046872,metal ion binding	K04565-ko04146,Peroxisome;ko05014,Amyotrophic lateral sclerosis (ALS);ko05016,Huntington's disease;ko05020,Prion diseases
c11458_g1	129.336	183.186	75.4861	0.412073	-1.27903	1.22e-15	9.58e-15	15.72	6.51	-	-	7e-47 gnl|CDD|212492 cd05327, retinol-DH_like_SDR_c_like, retinol dehydrogenase (retinol-DH), Light dependent Protochlorophyllide (Pchlide) OxidoReductase (LPOR) and related proteins, classical (c) SDRs. Classical SDR subgroup containing retinol-DHs, LPORs, and related proteins. Retinol is processed by a medium chain alcohol dehydrogenase followed by retinol-DHs. Pchlide reductases act in chlorop…	2e-45 gnl|CDD|229150 KOG1208, KOG1208, KOG1208, Dehydrogenases with different specificities (related to short-chain alcohol dehydrogenases) [Secondary metabolites biosynthesis, transport and catabolism].	0.0 gb|EGY16811.1| dehydrogenase/reductase SDR family member 13 [Verticillium dahliae VdLs.17]	0.0 ref|XM_003009557.1| Verticillium albo-atrum VaMs.102 conserved hypothetical protein, mRNA	8e-15 gnl|CDD|215720 pfam00106, adh_short, short chain dehydrogenase. This family contains a wide variety of dehydrogenases.	7e-25 sp|Q8BYK4|RDH12_MOUSE Retinol dehydrogenase 12 OS=Mus musculus GN=Rdh12 PE=2 SV=1	0.0 tr|G2XCU3|G2XCU3_VERDV Dehydrogenase/reductase SDR family member 13 OS=Verticillium dahliae (strain VdLs.17 / ATCC MYA-4575 / FGSC 10137) GN=VDAG_07975 PE=4 SV=1	GO:0007601,visual perception;GO:0050896,response to stimulus;GO:0005622,intracellular;GO:0055114,oxidation-reduction process;GO:0004745,retinol dehydrogenase activity;GO:0000166,nucleotide binding;GO:0016491,oxidoreductase activity;GO:0042572,retinol metabolic process	-
c11489_g1	3026.94	5250.43	803.441	0.153024	-2.70817	0	0	459.25	70.67	-	-	-	-	5e-14 emb|CCF37684.1| hypothetical protein CH063_01746 [Colletotrichum higginsianum]	-	-	-	5e-14 tr|H1VBT1|H1VBT1_COLHI Uncharacterized protein OS=Colletotrichum higginsianum (strain IMI 349063) GN=CH063_01746 PE=4 SV=1	-	-
c11490_g1	748.32	402.465	1094.17	2.71868	1.44291	1.77e-11	1.01e-10	71.58	196.81	-	-	2e-107 gnl|CDD|212683 cd11733, HSPA9-like_NBD, Nucleotide-binding domain of human HSPA9, Escherichia coli DnaK, and similar proteins. This subgroup includes human mitochondrial HSPA9 (also known as 70-kDa heat shock protein 9, CSA; MOT; MOT2; GRP75; PBP74; GRP-75; HSPA9B; MTHSP75; the gene encoding HSPA9 maps to 5q31.1), Escherichia coli DnaK, and Saccharomyces cerevisiae Stress-Seventy subfamily…	2e-107 gnl|CDD|228053 KOG0102, KOG0102, KOG0102, Molecular chaperones mortalin/PBP74/GRP75, HSP70 superfamily [Posttranslational modification, protein turnover, chaperones].	5e-97 emb|CCF42506.1| hsp70-like protein [Colletotrichum higginsianum]	4e-158 ref|XM_003009100.1| Verticillium albo-atrum VaMs.102 heat shock protein SSC1, mRNA	2e-87 gnl|CDD|215656 pfam00012, HSP70, Hsp70 protein. Hsp70 chaperones help to fold many proteins. Hsp70 assisted folding involves repeated cycles of substrate binding and release. Hsp70 activity is ATP dependent. Hsp70 proteins are made up of two regions: the amino terminus is the ATPase domain and the carboxyl terminus is the substrate binding region.	3e-90 sp|Q5B0C0|HSP7M_EMENI Heat shock 70 kDa protein OS=Emericella nidulans (strain FGSC A4 / ATCC 38163 / CBS 112.46 / NRRL 194 / M139) GN=AN6010 PE=1 SV=1	6e-97 tr|H1VQK0|H1VQK0_COLHI Hsp70-like protein OS=Colletotrichum higginsianum (strain IMI 349063) GN=CH063_12483 PE=3 SV=1	GO:0006457,protein folding;GO:0006626,protein targeting to mitochondrion;GO:0005524,ATP binding;GO:0006950,response to stress;GO:0005739,mitochondrion;GO:0042026,protein refolding	-
c11493_g1	34.1976	19.0677	49.3275	2.58696	1.37126	1.09e-05	3.82e-05	7.83	20.77	-	-	-	-	-	-	-	-	-	-	-
c11496_g1	307.246	420.171	194.321	0.46248	-1.11254	1.65e-27	1.99e-26	23.99	11.14	NECHADRAFT_102251	hypothetical protein	-	-	0.0 ref|XP_003044288.1| hypothetical protein NECHADRAFT_102251 [Nectria haematococca mpVI 77-13-4] gb|EEU38575.1| hypothetical protein NECHADRAFT_102251 [Nectria haematococca mpVI 77-13-4]	-	-	-	0.0 tr|C7ZBI3|C7ZBI3_NECH7 Putative uncharacterized protein OS=Nectria haematococca (strain 77-13-4 / ATCC MYA-4622 / FGSC 9596 / MPVI) GN=NECHADRAFT_102251 PE=4 SV=1	GO:0004713,protein tyrosine kinase activity;GO:0005524,ATP binding	-
c11498_g1	14.0931	25.1966	2.98955	0.118649	-3.07523	2.65e-07	1.06e-06	4.03	0.48	-	-	4e-28 gnl|CDD|233174 TIGR00893, 2A0114, D-galactonate transporter. [Transport and binding proteins, Carbohydrates, organic alcohols, and acids].	1e-39 gnl|CDD|230472 KOG2533, KOG2533, KOG2533, Permease of the major facilitator superfamily [Carbohydrate transport and metabolism].	3e-131 gb|EGY19685.1| hypothetical protein VDAG_01701 [Verticillium dahliae VdLs.17]	0.0 ref|XM_003007620.1| Verticillium albo-atrum VaMs.102 conserved hypothetical protein, mRNA	1e-19 gnl|CDD|219516 pfam07690, MFS_1, Major Facilitator Superfamily.	6e-29 sp|Q9US44|YIZG_SCHPO Uncharacterized transporter C1002.16c OS=Schizosaccharomyces pombe (strain 972 / ATCC 24843) GN=SPAC1002.16c PE=3 SV=1	3e-131 tr|G2WVR5|G2WVR5_VERDV Putative uncharacterized protein OS=Verticillium dahliae (strain VdLs.17 / ATCC MYA-4575 / FGSC 10137) GN=VDAG_01701 PE=4 SV=1	GO:0005887,integral to plasma membrane;GO:0035353,nicotinamide mononucleotide transmembrane transport;GO:0032153,cell division site;GO:0016021,integral to membrane;GO:0055085,transmembrane transport;GO:0051286,cell tip;GO:0005794,Golgi apparatus;GO:0015663,nicotinamide mononucleotide transmembrane transporter activity	-
c11516_g1	1006.23	1474.34	538.119	0.364989	-1.45408	8.25e-139	2.36e-137	67.59	24.74	-	-	9e-86 gnl|CDD|217764 pfam03856, SUN, Beta-glucosidase (SUN family). Members of this family include Nca3, Sun4 and Sim1. This is a family of yeast proteins, involved in a diverse set of functions (DNA replication, aging, mitochondrial biogenesis and cell septation). BGLA from Candida wickerhamii has been characterized as a Beta-glucosidase EC:3.2.1.21.	-	0.0 gb|EGY18860.1| UTH1 protein [Verticillium dahliae VdLs.17]	0.0 ref|XM_003002606.1| Verticillium albo-atrum VaMs.102 conserved hypothetical protein, mRNA	2e-86 gnl|CDD|217764 pfam03856, SUN, Beta-glucosidase (SUN family). Members of this family include Nca3, Sun4 and Sim1. This is a family of yeast proteins, involved in a diverse set of functions (DNA replication, aging, mitochondrial biogenesis and cell septation). BGLA from Candida wickerhamii has been characterized as a Beta-glucosidase EC:3.2.1.21.	1e-72 sp|Q04018|YM79_YEAST Uncharacterized protein YMR244W OS=Saccharomyces cerevisiae (strain ATCC 204508 / S288c) GN=YMR244W PE=3 SV=1	0.0 tr|G2XG41|G2XG41_VERDV UTH1 protein OS=Verticillium dahliae (strain VdLs.17 / ATCC MYA-4575 / FGSC 10137) GN=VDAG_09020 PE=4 SV=1	GO:0016021,integral to membrane	-
c1153_g1	50.0851	68.78	31.3902	0.456386	-1.13167	9.12e-06	3.23e-05	2	0.92	VDBG_10023	hypothetical protein	8e-12 gnl|CDD|217880 pfam04082, Fungal_trans, Fungal specific transcription factor domain.	-	0.0 ref|XP_002999729.1| conserved hypothetical protein [Verticillium alfalfae VaMs.102] gb|EEY23913.1| conserved hypothetical protein [Verticillium alfalfae VaMs.102]	0.0 ref|XM_002999683.1| Verticillium albo-atrum VaMs.102 conserved hypothetical protein, mRNA	2e-12 gnl|CDD|217880 pfam04082, Fungal_trans, Fungal specific transcription factor domain.	6e-10 sp|Q9US36|KLF1_SCHPO Zinc finger protein klf1 OS=Schizosaccharomyces pombe (strain 972 / ATCC 24843) GN=klf1 PE=2 SV=1	0.0 tr|C9SYP8|C9SYP8_VERA1 Putative uncharacterized protein OS=Verticillium albo-atrum (strain VaMs.102 / ATCC MYA-4576 / FGSC 10136) GN=VDBG_10023 PE=4 SV=1	GO:0005737,cytoplasm;GO:0003677,DNA binding;GO:0008270,zinc ion binding;GO:0005819,spindle;GO:0005634,nucleus;GO:0006351,transcription, DNA-dependent;GO:0046872,metal ion binding	-
c11538_g1	394.163	584.29	204.037	0.349205	-1.51786	1.13e-59	2.23e-58	21.83	7.64	-	-	-	-	6e-171 gb|EGY17148.1| hypothetical protein VDAG_00830 [Verticillium dahliae VdLs.17]	0.0 ref|XM_003005600.1| Verticillium albo-atrum VaMs.102 predicted protein, mRNA	-	-	7e-171 tr|G2WSP9|G2WSP9_VERDV Putative uncharacterized protein OS=Verticillium dahliae (strain VdLs.17 / ATCC MYA-4575 / FGSC 10137) GN=VDAG_00830 PE=4 SV=1	-	-
c11544_g1	3209.06	5101.98	1316.15	0.257968	-1.95473	0	0	334.06	86.53	-	-	-	-	1e-127 gb|EGY19664.1| hypothetical protein VDAG_01680 [Verticillium dahliae VdLs.17]	0.0 ref|XM_003007641.1| Verticillium albo-atrum VaMs.102 conserved hypothetical protein, mRNA	-	-	1e-127 tr|G2WVP4|G2WVP4_VERDV Putative uncharacterized protein OS=Verticillium dahliae (strain VdLs.17 / ATCC MYA-4575 / FGSC 10137) GN=VDAG_01680 PE=4 SV=1	-	-
c11546_g1	1024.25	376.588	1671.9	4.43962	2.15044	1.68e-11	9.6e-11	8.59	38.2	-	-	0.0 gnl|CDD|212092 cd11554, SLC6sbd_u2, uncharacterized eukaryotic solute carrier 6 subfamily; solute-binding domain. SLC6 proteins (also called the sodium- and chloride-dependent neurotransmitter transporter family or Na+/Cl--dependent transporter family) include neurotransmitter transporters (NTTs): these are sodium- and chloride-dependent plasma membrane transporters for the monoamine neurotra…	5e-80 gnl|CDD|231592 KOG3660, KOG3660, KOG3660, Sodium-neurotransmitter symporter [Signal transduction mechanisms].	0.0 gb|EGY16792.1| hypothetical protein VDAG_07956 [Verticillium dahliae VdLs.17]	0.0 ref|XM_003009577.1| Verticillium albo-atrum VaMs.102 bacterial alpha-L-rhamnosidase domain-containing protein, mRNA	4e-79 gnl|CDD|215790 pfam00209, SNF, Sodium:neurotransmitter symporter family.	5e-51 sp|P48057|SC6A1_MUSCO Sodium- and chloride-dependent GABA transporter 1 OS=Mus cookii GN=Slc6a1 PE=2 SV=1	0.0 tr|G2XCS4|G2XCS4_VERDV Transporter OS=Verticillium dahliae (strain VdLs.17 / ATCC MYA-4575 / FGSC 10137) GN=VDAG_07956 PE=3 SV=1	GO:0005887,integral to plasma membrane;GO:0005328,neurotransmitter:sodium symporter activity;GO:0005332,gamma-aminobutyric acid:sodium symporter activity;GO:0016021,integral to membrane	K05034-ko04727,GABAergic synapse
c11556_g1	135.881	202.254	69.507	0.343662	-1.54094	3.69e-22	3.78e-21	9.76	3.37	-	-	7e-56 gnl|CDD|220674 pfam10282, Lactonase, Lactonase, 7-bladed beta-propeller. This entry contains bacterial 6-phosphogluconolactonases (6PGL)YbhE-type (EC:3.1.1.31) which hydrolyse 6-phosphogluconolactone to 6-phosphogluconate. The entry also contains the fungal muconate lactonising enzyme carboxy-cis,cis-muconate cyclase (EC:5.5.1.5) and muconate cycloisomerase (EC:5.5.1.1), which convert cis,c…	-	0.0 gb|EGY19467.1| 6-phosphogluconolactonase [Verticillium dahliae VdLs.17]	0.0 ref|XM_003002299.1| Verticillium albo-atrum VaMs.102 6-phosphogluconolactonase, mRNA	1e-56 gnl|CDD|220674 pfam10282, Lactonase, Lactonase, 7-bladed beta-propeller. This entry contains bacterial 6-phosphogluconolactonases (6PGL)YbhE-type (EC:3.1.1.31) which hydrolyse 6-phosphogluconolactone to 6-phosphogluconate. The entry also contains the fungal muconate lactonising enzyme carboxy-cis,cis-muconate cyclase (EC:5.5.1.5) and muconate cycloisomerase (EC:5.5.1.1), which convert cis,c…	1e-15 sp|O34499|6PGL_BACSU 6-phosphogluconolactonase OS=Bacillus subtilis (strain 168) GN=pgl PE=1 SV=1	0.0 tr|G2XI19|G2XI19_VERDV 6-phosphogluconolactonase OS=Verticillium dahliae (strain VdLs.17 / ATCC MYA-4575 / FGSC 10137) GN=VDAG_09669 PE=4 SV=1	GO:0006098,pentose-phosphate shunt;GO:0017057,6-phosphogluconolactonase activity	-
c11558_g1	179.823	67.418	292.228	4.33457	2.11589	0	0	4.35	18.93	-	-	-	-	-	-	-	-	-	-	-
c1156_g1	17.3899	26.5586	8.22126	0.309551	-1.69175	0.000214931	0.000660677	13.79	4.4	-	-	-	-	-	-	-	-	-	-	-
c11575_g1	379.388	527.086	231.69	0.439567	-1.18584	1.43e-37	2.17e-36	14.63	6.44	-	-	5e-09 gnl|CDD|214501 smart00066, GAL4, GAL4-like Zn(II)2Cys6 (or C6 zinc) binuclear cluster DNA-binding domain. Gal4 is a positive regulator for the gene expression of the galactose- induced genes of S. cerevisiae. Is present only in fungi.	-	0.0 gb|EFQ28009.1| hypothetical protein GLRG_03153 [Colletotrichum graminicola M1.001]	0.0 ref|XM_003006242.1| Verticillium albo-atrum VaMs.102 conserved hypothetical protein, mRNA	3e-07 gnl|CDD|201056 pfam00172, Zn_clus, Fungal Zn(2)-Cys(6) binuclear cluster domain.	5e-08 sp|O74308|YOG2_SCHPO Uncharacterized transcriptional regulatory protein C15D4.02 OS=Schizosaccharomyces pombe (strain 972 / ATCC 24843) GN=SPBC15D4.02 PE=4 SV=3	0.0 tr|E3QAX1|E3QAX1_COLGM Putative uncharacterized protein OS=Colletotrichum graminicola (strain M1.001 / M2 / FGSC 10212) GN=GLRG_03153 PE=4 SV=1	GO:0000981,sequence-specific DNA binding RNA polymerase II transcription factor activity;GO:0000978,RNA polymerase II core promoter proximal region sequence-specific DNA binding;GO:0006357,regulation of transcription from RNA polymerase II promoter;GO:0008270,zinc ion binding;GO:0005634,nucleus;GO:0006366,transcription from RNA polymerase II promoter;GO:0000982,RNA polymerase II core promoter pro…	-
c11576_g1	333.14	456.263	210.016	0.460295	-1.11937	5.19e-30	6.65e-29	11.66	5.38	-	-	0.0 gnl|CDD|223327 COG0249, MutS, Mismatch repair ATPase (MutS family) [DNA replication, recombination, and repair].	0.0 gnl|CDD|228166 KOG0217, KOG0217, KOG0217, Mismatch repair ATPase MSH6 (MutS family) [Replication, recombination and repair].	0.0 gb|EGY17510.1| DNA mismatch repair protein msh6 [Verticillium dahliae VdLs.17]	0.0 ref|XM_003005966.1| Verticillium albo-atrum VaMs.102 DNA mismatch repair protein msh6, mRNA	3e-75 gnl|CDD|215944 pfam00488, MutS_V, MutS domain V. This domain is found in proteins of the MutS family (DNA mismatch repair proteins) and is found associated with pfam01624, pfam05188, pfam05192 and pfam05190. The mutS family of proteins is named after the Salmonella typhimurium MutS protein involved in mismatch repair; other members of the family included the eukaryotic MSH 1,2,3, 4,5 and 6 …	0.0 sp|O74502|MSH6_SCHPO DNA mismatch repair protein msh6 OS=Schizosaccharomyces pombe (strain 972 / ATCC 24843) GN=msh6 PE=1 SV=1	0.0 tr|G2WTR9|G2WTR9_VERDV DNA mismatch repair protein msh6 OS=Verticillium dahliae (strain VdLs.17 / ATCC MYA-4575 / FGSC 10137) GN=VDAG_01192 PE=3 SV=1	GO:0032137,guanine/thymine mispair binding;GO:0005524,ATP binding;GO:0005829,cytosol;GO:0005634,nucleus;GO:0006298,mismatch repair;GO:0030983,mismatched DNA binding;GO:0043570,maintenance of DNA repeat elements	K08737-ko03430,Mismatch repair;ko05200,Pathways in cancer;ko05210,Colorectal cancer
c11580_g1	161.791	222.684	100.897	0.453096	-1.14211	6.84e-16	5.46e-15	12.23	5.56	-	-	-	-	0.0 gb|EGY21572.1| hypothetical protein VDAG_03012 [Verticillium dahliae VdLs.17]	0.0 ref|XM_003003362.1| Verticillium albo-atrum VaMs.102 conserved hypothetical protein, mRNA	-	-	0.0 tr|G2WZY9|G2WZY9_VERDV Putative uncharacterized protein OS=Verticillium dahliae (strain VdLs.17 / ATCC MYA-4575 / FGSC 10137) GN=VDAG_03012 PE=4 SV=1	-	-
c11585_g1	452.76	639.45	266.07	0.416092	-1.26503	7.28e-50	1.31e-48	17.19	7.16	-	-	1e-42 gnl|CDD|213391 cd12148, fungal_TF_MHR, fungal transcription factor regulatory middle homology region. This domain is present in the large family of fungal zinc cluster transcription factors that contain an N-terminal GAL4-like C6 zinc binuclear cluster DNA-binding domain. Examples of members of this large fungal group are the following Saccharomyces cerevisiae transcription factors, GAL4, S…	-	0.0 gb|EGY22041.1| Zn(II)2Cys6 cluster transcripitional activator [Verticillium dahliae VdLs.17]	0.0 ref|XM_003003842.1| Verticillium albo-atrum VaMs.102 Zn(II)2Cys6 cluster transcripitional activator, mRNA	1e-24 gnl|CDD|217880 pfam04082, Fungal_trans, Fungal specific transcription factor domain.	3e-14 sp|P49413|UAY_EMENI Positive regulator of purine utilization OS=Emericella nidulans (strain FGSC A4 / ATCC 38163 / CBS 112.46 / NRRL 194 / M139) GN=uaY PE=4 SV=2	0.0 tr|G2WZN9|G2WZN9_VERDV Zn(II)2Cys6 cluster transcripitional activator OS=Verticillium dahliae (strain VdLs.17 / ATCC MYA-4575 / FGSC 10137) GN=VDAG_03481 PE=4 SV=1	GO:0000981,sequence-specific DNA binding RNA polymerase II transcription factor activity;GO:0003677,DNA binding;GO:0006357,regulation of transcription from RNA polymerase II promoter;GO:0008270,zinc ion binding;GO:0005634,nucleus;GO:0006366,transcription from RNA polymerase II promoter;GO:0046872,metal ion binding	-
c11594_g1	658.084	965.644	350.524	0.362995	-1.46198	2.71e-92	6.55e-91	57.23	20.85	-	-	2e-38 gnl|CDD|129474 TIGR00378, cax, calcium/proton exchanger (cax). [Transport and binding proteins, Cations and iron carrying compounds].	2e-49 gnl|CDD|229339 KOG1397, KOG1397, KOG1397, Ca2+/H+ antiporter VCX1 and related proteins [Inorganic ion transport and metabolism].	0.0 gb|EGY16882.1| vacuolar calcium ion transporter [Verticillium dahliae VdLs.17]	0.0 ref|XM_003009488.1| Verticillium albo-atrum VaMs.102 vacuolar calcium ion transporter, mRNA	6e-12 gnl|CDD|216653 pfam01699, Na_Ca_ex, Sodium/calcium exchanger protein. This is a family of sodium/calcium exchanger integral membrane proteins. This family covers the integral membrane regions of the proteins. Sodium/calcium exchangers regulate intracellular Ca2+ concentrations in many cells; cardiac myocytes, epithelial cells, neurons retinal rod photoreceptors and smooth muscle cells. Ca2+…	9e-34 sp|Q99385|VCX1_YEAST Vacuolar calcium ion transporter OS=Saccharomyces cerevisiae (strain ATCC 204508 / S288c) GN=VCX1 PE=1 SV=1	0.0 tr|G2XD14|G2XD14_VERDV Vacuolar calcium ion transporter OS=Verticillium dahliae (strain VdLs.17 / ATCC MYA-4575 / FGSC 10137) GN=VDAG_08046 PE=4 SV=1	GO:0000329,fungal-type vacuole membrane;GO:0016021,integral to membrane;GO:0006874,cellular calcium ion homeostasis;GO:0015386,potassium:hydrogen antiporter activity;GO:0015369,calcium:hydrogen antiporter activity;GO:0046872,metal ion binding	K07300
c1161_g2	36.7811	50.3933	23.169	0.459764	-1.12104	0.00016877	0.000523469	8.88	4.13	-	-	-	-	8e-136 gb|EGY16616.1| hypothetical protein VDAG_07780 [Verticillium dahliae VdLs.17]	5e-87 ref|XM_003009737.1| Verticillium albo-atrum VaMs.102 voltage-gated potassium channel subunit beta-1, mRNA	-	-	1e-135 tr|G2XC98|G2XC98_VERDV Putative uncharacterized protein OS=Verticillium dahliae (strain VdLs.17 / ATCC MYA-4575 / FGSC 10137) GN=VDAG_07780 PE=4 SV=1	-	-
c11612_g1	100.603	159.352	41.8537	0.26265	-1.92879	9.48e-24	1.03e-22	9.9	2.61	-	-	7e-164 gnl|CDD|215809 pfam00232, Glyco_hydro_1, Glycosyl hydrolase family 1.	1e-151 gnl|CDD|228573 KOG0626, KOG0626, KOG0626, Beta-glucosidase, lactase phlorizinhydrolase, and related proteins [Carbohydrate transport and metabolism].	0.0 gb|EGY16429.1| myrosinase [Verticillium dahliae VdLs.17]	0.0 ref|XM_003004494.1| Verticillium albo-atrum VaMs.102 beta-glucosidase, mRNA	2e-164 gnl|CDD|215809 pfam00232, Glyco_hydro_1, Glycosyl hydrolase family 1.	6e-140 sp|Q25BW4|BGL1B_PHACH Beta-glucosidase 1B OS=Phanerochaete chrysosporium GN=BGL1B PE=1 SV=1	0.0 tr|G2XC15|G2XC15_VERDV Myrosinase OS=Verticillium dahliae (strain VdLs.17 / ATCC MYA-4575 / FGSC 10137) GN=VDAG_07593 PE=3 SV=1	GO:0043169,cation binding;GO:0004553,hydrolase activity, hydrolyzing O-glycosyl compounds;GO:0005975,carbohydrate metabolic process;GO:0080079,cellobiose glucosidase activity;GO:0030245,cellulose catabolic process	K01188-ko00500,Starch and sucrose metabolism;ko00460,Cyanoamino acid metabolism;ko00940,Phenylpropanoid biosynthesis
c11616_g1	268.796	396.336	141.256	0.356405	-1.48841	6.62e-40	1.05e-38	38.21	13.7	-	-	-	-	0.0 gb|EGY17442.1| hypothetical protein VDAG_01124 [Verticillium dahliae VdLs.17]	0.0 ref|XM_003005898.1| Verticillium albo-atrum VaMs.102 conserved hypothetical protein, mRNA	-	-	0.0 tr|G2WTK1|G2WTK1_VERDV Putative uncharacterized protein OS=Verticillium dahliae (strain VdLs.17 / ATCC MYA-4575 / FGSC 10137) GN=VDAG_01124 PE=4 SV=1	-	-
c11620_g1	263.557	419.49	107.624	0.256558	-1.96264	2.72e-61	5.48e-60	28.83	7.43	-	-	9e-23 gnl|CDD|233174 TIGR00893, 2A0114, D-galactonate transporter. [Transport and binding proteins, Carbohydrates, organic alcohols, and acids].	7e-27 gnl|CDD|230472 KOG2533, KOG2533, KOG2533, Permease of the major facilitator superfamily [Carbohydrate transport and metabolism].	6e-157 gb|EGY22030.1| phthalate transporter [Verticillium dahliae VdLs.17]	0.0 ref|XM_003003829.1| Verticillium albo-atrum VaMs.102 allantoate permease, mRNA	4e-14 gnl|CDD|219516 pfam07690, MFS_1, Major Facilitator Superfamily.	1e-18 sp|Q9P6J0|YHDC_SCHPO Uncharacterized transporter C1683.12 OS=Schizosaccharomyces pombe (strain 972 / ATCC 24843) GN=SPBC1683.12 PE=3 SV=1	7e-157 tr|G2WZM8|G2WZM8_VERDV Phthalate transporter OS=Verticillium dahliae (strain VdLs.17 / ATCC MYA-4575 / FGSC 10137) GN=VDAG_03470 PE=4 SV=1	GO:0005783,endoplasmic reticulum;GO:0005887,integral to plasma membrane;GO:0035353,nicotinamide mononucleotide transmembrane transport;GO:0016021,integral to membrane;GO:0055085,transmembrane transport;GO:0015663,nicotinamide mononucleotide transmembrane transporter activity	-
c11623_g1	19.4321	0	38.8641	Inf	Inf	2.22e-16	1.82e-15	0	7.77	-	-	-	-	-	-	-	-	-	-	-
c11639_g1	776.515	1088.9	464.127	0.426234	-1.23028	3.52e-80	8.08e-79	38.89	16.61	-	-	5e-63 gnl|CDD|233801 TIGR02251, HIF-SF_euk, Dullard-like phosphatase domain. This model represents the putative phosphatase domain of a family of eukaryotic proteins including "Dullard" , and the NLI interacting factor (NIF)-like phosphatases. This domain is a member of the haloacid dehalogenase (HAD) superfamily by virtue of a conserved set of three catalytic motifs and a conserved fold as predi…	6e-74 gnl|CDD|229546 KOG1605, KOG1605, KOG1605, TFIIF-interacting CTD phosphatase, including NLI-interacting factor (involved in RNA polymerase II regulation) [Transcription].	0.0 gb|EGY17385.1| phosphatase PSR1 [Verticillium dahliae VdLs.17]	0.0 ref|XM_003005841.1| Verticillium albo-atrum VaMs.102 phosphatase PSR1, mRNA	6e-56 gnl|CDD|217328 pfam03031, NIF, NLI interacting factor-like phosphatase. This family contains a number of NLI interacting factor isoforms and also an N-terminal regions of RNA polymerase II CTC phosphatase and FCP1 serine phosphatase. This region has been identified as the minimal phosphatase domain.	7e-84 sp|Q07949|PSR2_YEAST Probable phosphatase PSR2 OS=Saccharomyces cerevisiae (strain ATCC 204508 / S288c) GN=PSR2 PE=1 SV=1	0.0 tr|G2WTE4|G2WTE4_VERDV Phosphatase PSR1 OS=Verticillium dahliae (strain VdLs.17 / ATCC MYA-4575 / FGSC 10137) GN=VDAG_01067 PE=4 SV=1	GO:0016791,phosphatase activity;GO:0004721,phosphoprotein phosphatase activity;GO:0009408,response to heat;GO:0009651,response to salt stress;GO:0016311,dephosphorylation;GO:0005886,plasma membrane	K15731
c11641_g1	17.9381	30.6446	5.23171	0.170722	-2.55028	2.36e-07	9.43e-07	1.5	0.26	-	-	-	-	-	-	-	-	-	-	-
c11645_g1	9.58324	2.72396	16.4425	6.03625	2.59365	0.000122753	0.000386234	0.28	1.67	-	-	6e-06 gnl|CDD|223846 COG0775, Pfs, Nucleoside phosphorylase [Nucleotide transport and metabolism].	-	1e-177 gb|EGY22160.1| pfs protein [Verticillium dahliae VdLs.17]	-	5e-06 gnl|CDD|216264 pfam01048, PNP_UDP_1, Phosphorylase superfamily. Members of this family include: purine nucleoside phosphorylase (PNP) Uridine phosphorylase (UdRPase) 5'-methylthioadenosine phosphorylase (MTA phosphorylase).	-	1e-177 tr|G2X1I7|G2X1I7_VERDV Pfs protein OS=Verticillium dahliae (strain VdLs.17 / ATCC MYA-4575 / FGSC 10137) GN=VDAG_03598 PE=4 SV=1	GO:0009116,nucleoside metabolic process;GO:0003824,catalytic activity	-
c11649_g1	2136.89	426.981	3846.8	9.0093	3.17142	1.85e-11	1.05e-10	185.96	1718.6	-	-	-	-	4e-50 gb|EGY22979.1| hypothetical protein VDAG_04417 [Verticillium dahliae VdLs.17]	-	-	-	5e-50 tr|G2X293|G2X293_VERDV Putative uncharacterized protein OS=Verticillium dahliae (strain VdLs.17 / ATCC MYA-4575 / FGSC 10137) GN=VDAG_04417 PE=4 SV=1	-	-
c11652_g1	468.828	309.851	627.805	2.02615	1.01874	9.26e-12	5.46e-11	14.68	29.83	VDBG_10080	alpha-glucosides permease MPH2/3	2e-97 gnl|CDD|233165 TIGR00879, SP, MFS transporter, sugar porter (SP) family. This model represent the sugar porter subfamily of the major facilitator superfamily (pfam00083) [Transport and binding proteins, Carbohydrates, organic alcohols, and acids].	7e-71 gnl|CDD|228203 KOG0254, KOG0254, KOG0254, Predicted transporter (major facilitator superfamily) [General function prediction only].	0.0 ref|XP_002999786.1| alpha-glucosides permease MPH2/3 [Verticillium alfalfae VaMs.102] gb|EEY23970.1| alpha-glucosides permease MPH2/3 [Verticillium alfalfae VaMs.102]	0.0 ref|XM_002999740.1| Verticillium albo-atrum VaMs.102 alpha-glucosides permease MPH2/3, mRNA	7e-77 gnl|CDD|215702 pfam00083, Sugar_tr, Sugar (and other) transporter.	9e-126 sp|P38156|MAL31_YEAST Maltose permease MAL31 OS=Saccharomyces cerevisiae (strain ATCC 204508 / S288c) GN=MAL31 PE=1 SV=1	0.0 tr|C9SYV5|C9SYV5_VERA1 Alpha-glucosides permease MPH2/3 OS=Verticillium albo-atrum (strain VaMs.102 / ATCC MYA-4576 / FGSC 10136) GN=VDBG_10080 PE=3 SV=1	GO:0000023,maltose metabolic process;GO:0005352,alpha-glucoside:hydrogen symporter activity;GO:0022891,substrate-specific transmembrane transporter activity;GO:0008643,carbohydrate transport;GO:0016021,integral to membrane	K08141
c1168_g1	24.0577	4.76693	43.3484	9.09357	3.18485	1.95e-12	1.24e-11	0.4	3.7	-	-	-	-	-	-	-	-	-	-	-
c11687_g1	277.98	376.588	179.373	0.476311	-1.07002	2.1e-23	2.25e-22	19.03	9.09	-	-	6e-40 gnl|CDD|198326 cd10293, GST_C_Ure2p, C-terminal, alpha helical domain of fungal Ure2p Glutathione S-transferases. Glutathione S-transferase (GST) C-terminal domain family, Ure2p subfamily; composed of the Saccharomyces cerevisiae Ure2p and related fungal proteins. Ure2p is a regulator for nitrogen catabolism in yeast. It represses the expression of several gene products involved in the use …	1e-31 gnl|CDD|228813 KOG0867, KOG0867, KOG0867, Glutathione S-transferase [Posttranslational modification, protein turnover, chaperones].	4e-146 gb|EGY18819.1| URE2 protein [Verticillium dahliae VdLs.17]	0.0 ref|XM_003004747.1| Verticillium albo-atrum VaMs.102 glutathione S-transferase II, mRNA	6e-10 gnl|CDD|222110 pfam13409, GST_N_2, Glutathione S-transferase, N-terminal domain. This family is closely related to pfam02798.	4e-46 sp|Q9Y7Q2|GST1_SCHPO Glutathione S-transferase 1 OS=Schizosaccharomyces pombe (strain 972 / ATCC 24843) GN=gst1 PE=2 SV=1	5e-146 tr|G2XG00|G2XG00_VERDV URE2 protein OS=Verticillium dahliae (strain VdLs.17 / ATCC MYA-4575 / FGSC 10137) GN=VDAG_08979 PE=3 SV=1	GO:0004364,glutathione transferase activity;GO:0042493,response to drug;GO:0034599,cellular response to oxidative stress;GO:0005829,cytosol;GO:0005634,nucleus	K00799-ko00480,Glutathione metabolism;ko00980,Metabolism of xenobiotics by cytochrome P450;ko00982,Drug metabolism - cytochrome P450;ko05204,Chemical carcinogenesis
c11693_g1	131.031	209.745	52.3171	0.249432	-2.00328	2.86e-32	3.86e-31	47.42	12	-	-	-	-	1e-50 gb|EGY20592.1| kelch repeat protein [Verticillium dahliae VdLs.17]	2e-169 ref|XM_003001105.1| Verticillium albo-atrum VaMs.102 kelch repeat protein, mRNA	-	-	2e-50 tr|G2XJ89|G2XJ89_VERDV Kelch repeat protein OS=Verticillium dahliae (strain VdLs.17 / ATCC MYA-4575 / FGSC 10137) GN=VDAG_10221 PE=4 SV=1	-	-
c11696_g1	184.299	59.9271	308.671	5.15077	2.36479	0	0	3.61	18.65	-	-	-	-	6e-119 gb|EGY21874.1| hypothetical protein VDAG_03314 [Verticillium dahliae VdLs.17]	2e-145 ref|XM_003003668.1| Verticillium albo-atrum VaMs.102 predicted protein, mRNA	-	-	7e-119 tr|G2WZ72|G2WZ72_VERDV Putative uncharacterized protein OS=Verticillium dahliae (strain VdLs.17 / ATCC MYA-4575 / FGSC 10137) GN=VDAG_03314 PE=4 SV=1	-	-
c117_g1	28.0866	52.4362	3.73693	0.0712662	-3.81064	1.76e-16	1.45e-15	2.51	0.18	-	-	1e-89 gnl|CDD|233179 TIGR00911, 2A0308, L-type amino acid transporter. [Transport and binding proteins, Amino acids, peptides and amines].	2e-77 gnl|CDD|229229 KOG1287, KOG1287, KOG1287, Amino acid transporters [Amino acid transport and metabolism].	0.0 gb|EGY20223.1| high-affinity methionine permease [Verticillium dahliae VdLs.17]	0.0 ref|XM_003007150.1| Verticillium albo-atrum VaMs.102 high-affinity methionine permease, mRNA	5e-77 gnl|CDD|222193 pfam13520, AA_permease_2, Amino acid permease.	3e-91 sp|P50276|MUP1_YEAST High-affinity methionine permease OS=Saccharomyces cerevisiae (strain ATCC 204508 / S288c) GN=MUP1 PE=1 SV=1	0.0 tr|G2WV98|G2WV98_VERDV High-affinity methionine permease OS=Verticillium dahliae (strain VdLs.17 / ATCC MYA-4575 / FGSC 10137) GN=VDAG_02239 PE=4 SV=1	GO:0005887,integral to plasma membrane;GO:0000102,L-methionine secondary active transmembrane transporter activity;GO:0042883,cysteine transport;GO:0016021,integral to membrane;GO:0015171,amino acid transmembrane transporter activity	-
c11701_g1	920.076	1233.27	606.878	0.492087	-1.02301	8.06e-68	1.71e-66	39.63	19.54	-	-	9e-49 gnl|CDD|99783 cd06186, NOX_Duox_like_FAD_NADP, NADPH oxidase (NOX) catalyzes the generation of reactive oxygen species (ROS) such as superoxide and hydrogen peroxide. ROS were originally identified as bactericidal agents in phagocytes, but are now also implicated in cell signaling and metabolism. NOX has a 6-alpha helix heme-binding transmembrane domain fused to a flavoprotein with the nucl…	6e-44 gnl|CDD|227990 KOG0039, KOG0039, KOG0039, Ferric reductase, NADH/NADPH oxidase and related proteins [Inorganic ion transport and metabolism, Secondary metabolites biosynthesis, transport and catabolism].	0.0 gb|EGY15452.1| FreB [Verticillium dahliae VdLs.17]	0.0 ref|XM_003002353.1| Verticillium albo-atrum VaMs.102 ferric reductase transmembrane component 3, mRNA	4e-29 gnl|CDD|216705 pfam01794, Ferric_reduct, Ferric reductase like transmembrane component. This family includes a common region in the transmembrane proteins mammalian cytochrome B-245 heavy chain (gp91-phox), ferric reductase transmembrane component in yeast and respiratory burst oxidase from mouse-ear cress. This may be a family of flavocytochromes capable of moving electrons across the plas…	2e-43 sp|Q08905|FRE3_YEAST Ferric reductase transmembrane component 3 OS=Saccharomyces cerevisiae (strain ATCC 204508 / S288c) GN=FRE3 PE=1 SV=1	0.0 tr|G2X8Y4|G2X8Y4_VERDV FreB OS=Verticillium dahliae (strain VdLs.17 / ATCC MYA-4575 / FGSC 10137) GN=VDAG_06616 PE=4 SV=1	GO:0000293,ferric-chelate reductase activity;GO:0016021,integral to membrane;GO:0005886,plasma membrane;GO:0016491,oxidoreductase activity;GO:0015891,siderophore transport;GO:0006811,ion transport;GO:0022900,electron transport chain;GO:0046872,metal ion binding	-
c11704_g1	381.339	510.062	252.617	0.495267	-1.01372	1.22e-28	1.51e-27	17.93	8.9	-	-	-	-	0.0 gb|EGY19544.1| hypothetical protein VDAG_09878 [Verticillium dahliae VdLs.17]	0.0 ref|XM_003005509.1| Verticillium albo-atrum VaMs.102 conserved hypothetical protein, mRNA	-	-	0.0 tr|G2XI96|G2XI96_VERDV Putative uncharacterized protein OS=Verticillium dahliae (strain VdLs.17 / ATCC MYA-4575 / FGSC 10137) GN=VDAG_09878 PE=4 SV=1	-	-
c11705_g1	11.8586	2.04297	21.6742	10.6092	3.40724	3.82e-07	1.51e-06	1.01	10.97	-	-	-	-	-	-	-	-	-	-	-
c11707_g1	14.8737	24.5156	5.23171	0.213403	-2.22835	2.08e-05	7.13e-05	2.43	0.52	-	-	-	-	2e-117 gb|EGY22334.1| hypothetical protein VDAG_03772 [Verticillium dahliae VdLs.17]	1e-84 ref|XM_003006672.1| Verticillium albo-atrum VaMs.102 predicted protein, mRNA	-	-	3e-117 tr|G2X0J3|G2X0J3_VERDV Putative uncharacterized protein OS=Verticillium dahliae (strain VdLs.17 / ATCC MYA-4575 / FGSC 10137) GN=VDAG_03772 PE=4 SV=1	-	-
c11709_g1	443.924	636.726	251.122	0.394396	-1.34228	3.01e-54	5.72e-53	59.05	23.43	-	-	1e-35 gnl|CDD|217891 pfam04098, Rad52_Rad22, Rad52/22 family double-strand break repair protein. The DNA single-strand annealing proteins (SSAPs), such as RecT, Red-beta, ERF and Rad52, function in RecA-dependent and RecA-independent DNA recombination pathways. This family includes proteins related to Rad52. These proteins contain two helix-hairpin-helix motifs.	1e-26 gnl|CDD|232072 KOG4141, KOG4141, KOG4141, DNA repair and recombination protein RAD52/RAD22 [Replication, recombination and repair].	7e-27 gb|EIM24269.1| dsRNA-binding domain-like protein, partial [Wallemia sebi CBS 633.66]	-	3e-36 gnl|CDD|217891 pfam04098, Rad52_Rad22, Rad52/22 family double-strand break repair protein. The DNA single-strand annealing proteins (SSAPs), such as RecT, Red-beta, ERF and Rad52, function in RecA-dependent and RecA-independent DNA recombination pathways. This family includes proteins related to Rad52. These proteins contain two helix-hairpin-helix motifs.	7e-26 sp|Q756F4|RAD52_ASHGO DNA repair and recombination protein RAD52 OS=Ashbya gossypii (strain ATCC 10895 / CBS 109.51 / FGSC 9923 / NRRL Y-1056) GN=RAD52 PE=3 SV=1	8e-27 tr|I4YJX7|I4YJX7_WALSC DsRNA-binding domain-like protein (Fragment) OS=Wallemia sebi (strain ATCC MYA-4683 / CBS 633.66) GN=WALSEDRAFT_13165 PE=4 SV=1	GO:0006310,DNA recombination;GO:0005634,nucleus;GO:0006281,DNA repair	-
c1171_g1	30.0453	12.2578	47.8328	3.90222	1.9643	2.1e-08	9.05e-08	3.96	15.76	-	-	-	-	-	-	-	-	-	-	-
c11751_g1	108.782	152.542	65.0227	0.426261	-1.23019	1.43e-12	9.24e-12	15.31	6.57	-	-	-	-	9e-98 gb|EGY23241.1| hypothetical protein VDAG_04679 [Verticillium dahliae VdLs.17]	0.0 ref|XM_003000203.1| Verticillium albo-atrum VaMs.102 conserved hypothetical protein, mRNA	-	-	1e-97 tr|G2X3U2|G2X3U2_VERDV Putative uncharacterized protein OS=Verticillium dahliae (strain VdLs.17 / ATCC MYA-4575 / FGSC 10137) GN=VDAG_04679 PE=4 SV=1	-	-
c11754_g1	590.757	821.274	360.24	0.438636	-1.1889	8.19e-58	1.61e-56	59.67	26.3	VDBG_04886	hypothetical protein	8e-53 gnl|CDD|187688 cd09630, CDH_like_cytochrome, Heme-binding cytochrome domain of fungal cellobiose dehydrogenases. Cellobiose dehydrogenase (CellobioseDH or CDH) is an extracellular fungal oxidoreductase that degrades both lignin and cellulose. Specifically, CDHs oxidize cellobiose, cellodextrins, and lactose to corresponding lactones, utilizing a variety of electron acceptors. Class-II CDHs …	-	0.0 ref|XP_003005280.1| conserved hypothetical protein [Verticillium alfalfae VaMs.102] gb|EEY18777.1| conserved hypothetical protein [Verticillium alfalfae VaMs.102]	0.0 ref|XM_003005234.1| Verticillium albo-atrum VaMs.102 conserved hypothetical protein, mRNA	4e-06 gnl|CDD|192545 pfam10348, DUF2427, Domain of unknown function (DUF2427). This is the N-terminal region of a family of proteins conserved in fungi. Several members are annotated as being Ftp1 but this could not be confirmed. The function is not known.	-	0.0 tr|C9SIK4|C9SIK4_VERA1 Putative uncharacterized protein OS=Verticillium albo-atrum (strain VaMs.102 / ATCC MYA-4576 / FGSC 10136) GN=VDBG_04886 PE=4 SV=1	GO:0003824,catalytic activity;GO:0016052,carbohydrate catabolic process;GO:0030246,carbohydrate binding	-
c11763_g1	124.226	81.0378	167.415	2.06588	1.04676	5.3e-11	2.86e-10	6.21	12.89	-	-	-	-	3e-140 gb|EGY20305.1| hypothetical protein VDAG_02321 [Verticillium dahliae VdLs.17]	0.0 ref|XM_003001940.1| Verticillium albo-atrum VaMs.102 conserved hypothetical protein, mRNA	-	-	3e-140 tr|G2WVI0|G2WVI0_VERDV Putative uncharacterized protein OS=Verticillium dahliae (strain VdLs.17 / ATCC MYA-4575 / FGSC 10137) GN=VDAG_02321 PE=4 SV=1	GO:0004871,signal transducer activity;GO:0003700,sequence-specific DNA binding transcription factor activity;GO:0008270,zinc ion binding;GO:0043565,sequence-specific DNA binding	-
c1177_g1	161.712	93.9766	229.448	2.44154	1.28779	1.08e-12	7.1e-12	3.64	8.9	-	-	9e-152 gnl|CDD|236177 PRK08186, PRK08186, allophanate hydrolase; Provisional.	6e-45 gnl|CDD|229153 KOG1211, KOG1211, KOG1211, Amidases [Translation, ribosomal structure and biogenesis].	0.0 gb|EGY14195.1| glutamyl-tRNA(Gln) amidotransferase subunit A [Verticillium dahliae VdLs.17]	0.0 ref|XM_002999716.1| Verticillium albo-atrum VaMs.102 glutamyl-tRNA(Gln) amidotransferase subunit A, mRNA	3e-64 gnl|CDD|216494 pfam01425, Amidase, Amidase.	1e-75 sp|Q936X2|ATZF_PSESD Allophanate hydrolase OS=Pseudomonas sp. (strain ADP) GN=atzF PE=1 SV=1	0.0 tr|G2X643|G2X643_VERDV Glutamyl-tRNA(Gln) amidotransferase subunit A OS=Verticillium dahliae (strain VdLs.17 / ATCC MYA-4575 / FGSC 10137) GN=VDAG_05359 PE=4 SV=1	GO:0016740,transferase activity;GO:0019381,atrazine catabolic process;GO:0016884,carbon-nitrogen ligase activity, with glutamine as amido-N-donor;GO:0004039,allophanate hydrolase activity	-
c11789_g1	431.813	202.935	660.69	3.25567	1.70296	1.81e-12	1.16e-11	13.54	44.25	-	-	-	-	0.0 gb|EGY17620.1| hypothetical protein VDAG_01302 [Verticillium dahliae VdLs.17]	0.0 ref|XM_003006076.1| Verticillium albo-atrum VaMs.102 hypothetical protein, mRNA	-	-	0.0 tr|G2WU29|G2WU29_VERDV Putative uncharacterized protein OS=Verticillium dahliae (strain VdLs.17 / ATCC MYA-4575 / FGSC 10137) GN=VDAG_01302 PE=4 SV=1	-	-
c11800_g1	524.157	838.299	210.016	0.250526	-1.99697	1.85e-123	5.05e-122	47.12	11.85	-	-	3e-154 gnl|CDD|133086 cd06228, M14-like_3, Peptidase M14-like domain; uncharacterized subfamily. A functionally uncharacterized subgroup of the M14 family of metallocarboxypeptidases (MCPs). The M14 family are zinc-binding carboxypeptidases (CPs) which hydrolyze single, C-terminal amino acids from polypeptide chains, and have a recognition site for the free C-terminal carboxyl group, which is a k…	2e-31 gnl|CDD|230589 KOG2650, KOG2650, KOG2650, Zinc carboxypeptidase [Function unknown].	0.0 gb|EGY16019.1| carboxypeptidase A [Verticillium dahliae VdLs.17]	0.0 ref|XM_003000488.1| Verticillium albo-atrum VaMs.102 peptidase M14, mRNA	3e-31 gnl|CDD|215816 pfam00246, Peptidase_M14, Zinc carboxypeptidase.	2e-13 sp|P42788|CBPZ_SIMVI Zinc carboxypeptidase (Fragment) OS=Simulium vittatum PE=2 SV=1	0.0 tr|G2XB45|G2XB45_VERDV Carboxypeptidase A OS=Verticillium dahliae (strain VdLs.17 / ATCC MYA-4575 / FGSC 10137) GN=VDAG_07183 PE=4 SV=1	GO:0006508,proteolysis;GO:0008270,zinc ion binding;GO:0005576,extracellular region;GO:0004181,metallocarboxypeptidase activity;GO:0046872,metal ion binding	-
c11801_g1	374.482	604.719	144.246	0.238533	-2.06774	1.27e-93	3.12e-92	55.52	13.32	-	-	-	-	0.0 gb|EGY21976.1| hypothetical protein VDAG_03416 [Verticillium dahliae VdLs.17]	0.0 ref|XM_003003773.1| Verticillium albo-atrum VaMs.102 conserved hypothetical protein, mRNA	-	-	0.0 tr|G2WZH4|G2WZH4_VERDV Putative uncharacterized protein OS=Verticillium dahliae (strain VdLs.17 / ATCC MYA-4575 / FGSC 10137) GN=VDAG_03416 PE=4 SV=1	-	-
c11837_g1	45.2254	7.49089	82.9599	11.0748	3.46921	0	0	0.46	5.11	-	-	-	-	7e-55 gb|EGY15097.1| hypothetical protein VDAG_06587 [Verticillium dahliae VdLs.17]	4e-101 ref|XM_003001082.1| Verticillium albo-atrum VaMs.102 predicted protein, mRNA	-	-	8e-55 tr|G2X7X9|G2X7X9_VERDV Putative uncharacterized protein OS=Verticillium dahliae (strain VdLs.17 / ATCC MYA-4575 / FGSC 10137) GN=VDAG_06587 PE=4 SV=1	-	-
c11844_g1	37.3957	53.1172	21.6742	0.408045	-1.2932	1.53e-05	5.31e-05	2.98	1.22	-	-	3e-129 gnl|CDD|219446 pfam07519, Tannase, Tannase and feruloyl esterase. This family includes fungal tannase and feruloyl esterase. It also includes several bacterial homologues of unknown function.	-	0.0 gb|EGY23272.1| feruloyl esterase B [Verticillium dahliae VdLs.17]	0.0 ref|XM_003000235.1| Verticillium albo-atrum VaMs.102 feruloyl esterase B, mRNA	5e-130 gnl|CDD|219446 pfam07519, Tannase, Tannase and feruloyl esterase. This family includes fungal tannase and feruloyl esterase. It also includes several bacterial homologues of unknown function.	0.0 sp|B8NPA4|FAEB1_ASPFN Probable feruloyl esterase B-1 OS=Aspergillus flavus (strain ATCC 200026 / FGSC A1120 / NRRL 3357 / JCM 12722 / SRRC 167) GN=faeB-1 PE=3 SV=1	0.0 tr|G2X3X3|G2X3X3_VERDV Feruloyl esterase B OS=Verticillium dahliae (strain VdLs.17 / ATCC MYA-4575 / FGSC 10137) GN=VDAG_04710 PE=4 SV=1	GO:0045493,xylan catabolic process;GO:0030600,feruloyl esterase activity;GO:0004091,carboxylesterase activity;GO:0005576,extracellular region	K09252
c11857_g1	59.2036	81.0378	37.3693	0.461135	-1.11674	1.85e-06	6.96e-06	7.81	3.62	-	-	5e-140 gnl|CDD|222398 pfam13816, Dehydratase_hem, Haem-containing dehydratase. This family includes aldoxime dehydratase, EC:4.99.1.5. This is a haem-containing enzyme, which catalyzes the dehydration of aldoximes to their corresponding nitrile. It also includes phenylacetaldoxime dehydratase, EC:4.99.1.7. This haem-containing enzyme catalyzes the dehydration of Z-phenylacetaldoxime to phenylacet…	-	0.0 gb|EGY19157.1| phenylacetaldoxime dehydratase [Verticillium dahliae VdLs.17]	0.0 ref|XM_002999987.1| Verticillium albo-atrum VaMs.102 phenylacetaldoxime dehydratase, mRNA	1e-140 gnl|CDD|222398 pfam13816, Dehydratase_hem, Haem-containing dehydratase. This family includes aldoxime dehydratase, EC:4.99.1.5. This is a haem-containing enzyme, which catalyzes the dehydration of aldoximes to their corresponding nitrile. It also includes phenylacetaldoxime dehydratase, EC:4.99.1.7. This haem-containing enzyme catalyzes the dehydration of Z-phenylacetaldoxime to phenylacet…	3e-39 sp|P82604|OXD_BACSX Phenylacetaldoxime dehydratase OS=Bacillus sp. (strain OxB-1) GN=oxd PE=1 SV=2	0.0 tr|G2XH59|G2XH59_VERDV Phenylacetaldoxime dehydratase OS=Verticillium dahliae (strain VdLs.17 / ATCC MYA-4575 / FGSC 10137) GN=VDAG_09491 PE=4 SV=1	GO:0016829,lyase activity;GO:0046872,metal ion binding;GO:0018814,phenylacetaldoxime dehydratase activity	-
c11872_g1	309.123	427.662	190.584	0.445641	-1.16605	5.02e-30	6.45e-29	86.18	38.9	VDBG_09462	hypothetical protein	-	-	3e-26 ref|XP_003000267.1| conserved hypothetical protein [Verticillium alfalfae VaMs.102] gb|EEY23352.1| conserved hypothetical protein [Verticillium alfalfae VaMs.102]	0.0 ref|XM_003000221.1| Verticillium albo-atrum VaMs.102 conserved hypothetical protein, mRNA	-	-	3e-26 tr|C9SXG2|C9SXG2_VERA1 Putative uncharacterized protein OS=Verticillium albo-atrum (strain VaMs.102 / ATCC MYA-4576 / FGSC 10136) GN=VDBG_09462 PE=4 SV=1	-	-
c11891_g1	10.6711	3.40495	17.9373	5.268	2.39726	0.000121756	0.000383394	0.55	2.91	-	-	-	-	-	-	-	-	-	-	-
c11896_g1	15.8696	4.08594	27.6533	6.76792	2.75871	2e-07	8.04e-07	0.88	6.02	-	-	-	-	-	-	-	-	-	-	-
c11903_g1	5.97909	0	11.9582	Inf	Inf	6.79e-06	2.43e-05	0	2.81	-	-	-	-	-	-	-	-	-	-	-
c1192_g1	21.5831	9.53386	33.6324	3.52768	1.81872	8.64e-06	3.07e-05	1.04	3.68	-	-	-	-	1e-60 gb|EGY19658.1| hypothetical protein VDAG_01674 [Verticillium dahliae VdLs.17]	6e-138 ref|XM_003007648.1| Verticillium albo-atrum VaMs.102 predicted protein, mRNA	-	-	2e-60 tr|G2WVN8|G2WVN8_VERDV Putative uncharacterized protein OS=Verticillium dahliae (strain VdLs.17 / ATCC MYA-4575 / FGSC 10137) GN=VDAG_01674 PE=4 SV=1	-	-
c11929_g1	292.945	391.569	194.321	0.496261	-1.01083	2.93e-22	3.02e-21	19.86	9.89	-	-	8e-43 gnl|CDD|153251 cd07989, LPLAT_AGPAT-like, Lysophospholipid Acyltransferases (LPLATs) of Glycerophospholipid Biosynthesis: AGPAT-like. Lysophospholipid acyltransferase (LPLAT) superfamily member: acyltransferases of de novo and remodeling pathways of glycerophospholipid biosynthesis which catalyze the incorporation of an acyl group from either acylCoAs or acyl-acyl carrier proteins (acylACPs…	4e-61 gnl|CDD|230787 KOG2848, KOG2848, KOG2848, 1-acyl-sn-glycerol-3-phosphate acyltransferase [Lipid transport and metabolism].	0.0 gb|EGY19312.1| 1-acyl-sn-glycerol-3-phosphate acyltransferase beta [Verticillium dahliae VdLs.17]	0.0 ref|XM_003006394.1| Verticillium albo-atrum VaMs.102 1-acyl-sn-glycerol-3-phosphate acyltransferase beta, mRNA	2e-30 gnl|CDD|216567 pfam01553, Acyltransferase, Acyltransferase. This family contains acyltransferases involved in phospholipid biosynthesis and other proteins of unknown function. This family also includes tafazzin, the Barth syndrome gene.	1e-43 sp|Q9US20|YLD2_SCHPO Uncharacterized acyltransferase C1851.02 OS=Schizosaccharomyces pombe (strain 972 / ATCC 24843) GN=SPAC1851.02 PE=3 SV=1	0.0 tr|G2XHL8|G2XHL8_VERDV 1-acyl-sn-glycerol-3-phosphate acyltransferase beta OS=Verticillium dahliae (strain VdLs.17 / ATCC MYA-4575 / FGSC 10137) GN=VDAG_09772 PE=4 SV=1	GO:0016020,membrane;GO:0003841,1-acylglycerol-3-phosphate O-acyltransferase activity;GO:0008654,phospholipid biosynthetic process;GO:0005789,endoplasmic reticulum membrane;GO:0016021,integral to membrane;GO:0046474,glycerophospholipid biosynthetic process	K13509-ko00561,Glycerolipid metabolism;ko00564,Glycerophospholipid metabolism;ko04975,Fat digestion and absorption
c11930_g1	71.4861	97.3816	45.5906	0.468164	-1.09491	2.61e-07	1.04e-06	15.98	7.56	-	-	5e-66 gnl|CDD|193498 cd03876, M28_SGAP_like, M28 Zn-peptidase Streptomyces griseus Aminopeptidase and similar proteins. Peptidase family M28; Streptomyces griseus Aminopeptidase (SGAP, Leucine aminopeptidase (LAP), aminopeptidase S, Mername-AA022 peptidase) subfamily. SGAP is a di-zinc exopeptidase with high preference towards large hydrophobic amino-terminal residues, with Leu being the most eff…	4e-09 gnl|CDD|230134 KOG2195, KOG2195, KOG2195, Transferrin receptor and related proteins containing the protease-associated (PA) domain [Posttranslational modification, protein turnover, chaperones, Inorganic ion transport and metabolism, General function prediction only].	1e-140 gb|EGY22469.1| aminopeptidase Y [Verticillium dahliae VdLs.17]	5e-18 ref|XM_003716829.1| Magnaporthe oryzae 70-15 aminopeptidase Y (MGG_12773) mRNA, complete cds	5e-24 gnl|CDD|218057 pfam04389, Peptidase_M28, Peptidase family M28.	1e-22 sp|A7UI10|LAP2_TRITO Leucine aminopeptidase 2 OS=Trichophyton tonsurans GN=LAP2 PE=3 SV=1	2e-140 tr|G2X0X8|G2X0X8_VERDV Aminopeptidase Y OS=Verticillium dahliae (strain VdLs.17 / ATCC MYA-4575 / FGSC 10137) GN=VDAG_03907 PE=4 SV=1	GO:0016020,membrane;GO:0006508,proteolysis;GO:0009405,pathogenesis;GO:0008237,metallopeptidase activity;GO:0004177,aminopeptidase activity;GO:0005576,extracellular region;GO:0004571,mannosyl-oligosaccharide 1,2-alpha-mannosidase activity;GO:0005509,calcium ion binding	-
c11939_g1	32.8688	15.6628	50.0749	3.19707	1.67675	2.71e-07	1.08e-06	12.88	42.84	-	-	-	-	-	-	-	-	-	-	-
c1194_g1	1394.27	2107.66	680.869	0.323044	-1.6302	3.44e-233	1.12e-231	80.71	26.14	-	-	-	-	6e-63 gb|EFQ26830.1| adhesin protein Mad1 [Colletotrichum graminicola M1.001]	4e-38 ref|XM_003659984.1| Myceliophthora thermophila ATCC 42464 hypothetical protein (MYCTH_2297802) mRNA, complete cds	-	-	7e-63 tr|E3Q7J2|E3Q7J2_COLGM Adhesin protein Mad1 OS=Colletotrichum graminicola (strain M1.001 / M2 / FGSC 10212) GN=GLRG_02650 PE=4 SV=1	-	-
c11949_g1	338.113	108.958	567.267	5.20627	2.38025	9.43e-13	6.22e-12	5.31	27.71	-	-	-	-	0.0 gb|EGY13830.1| arrestin [Verticillium dahliae VdLs.17]	0.0 ref|XM_003009174.1| Verticillium albo-atrum VaMs.102 arrestin, mRNA	-	-	0.0 tr|G2WQ70|G2WQ70_VERDV Arrestin OS=Verticillium dahliae (strain VdLs.17 / ATCC MYA-4575 / FGSC 10137) GN=VDAG_00512 PE=4 SV=1	-	-
c11958_g1	52.7265	91.2527	14.2003	0.155616	-2.68394	1.82e-20	1.76e-19	11.53	1.81	-	-	-	-	-	-	-	-	-	-	-
c11963_g1	18.8592	4.08594	33.6324	8.23125	3.04111	1.5e-09	7.03e-09	0.58	4.82	-	-	-	-	-	-	-	-	-	-	-
c11975_g1	30.0129	43.5834	16.4425	0.377266	-1.40635	3.06e-05	0.00010314	25.58	9.96	VDBG_01347	serine/threonine-protein phosphatase PP2A-3 catalytic subunit	1e-11 gnl|CDD|163658 cd07415, MPP_PP2A_PP4_PP6, PP2A, PP4, and PP6 phosphoprotein phosphatases, metallophosphatase domain. PP2A-like family of phosphoprotein phosphatases (PPP's) including PP4 and PP6. PP2A (Protein phosphatase 2A) is a critical regulator of many cellular activities. PP2A comprises about 1% of total cellular proteins. PP2A, together with protein phosphatase 1 (PP1), accounts for …	7e-12 gnl|CDD|228321 KOG0372, KOG0372, KOG0372, Serine/threonine specific protein phosphatase involved in glycogen accumulation, PP2A-related [Carbohydrate transport and metabolism, Signal transduction mechanisms].	8e-32 ref|XP_003009664.1| serine/threonine-protein phosphatase PP2A-3 catalytic subunit [Verticillium alfalfae VaMs.102] gb|EEY15238.1| serine/threonine-protein phosphatase PP2A-3 catalytic subunit [Verticillium alfalfae VaMs.102]	3e-81 ref|XM_003009618.1| Verticillium albo-atrum VaMs.102 serine/threonine-protein phosphatase PP2A-3 catalytic subunit, mRNA	-	7e-09 sp|Q54RD6|PP2AB_DICDI Probable serine/threonine-protein phosphatase 2A catalytic subunit B OS=Dictyostelium discoideum GN=DDB_G0283187 PE=3 SV=1	1e-31 tr|C9S7E2|C9S7E2_VERA1 Serine/threonine-protein phosphatase OS=Verticillium albo-atrum (strain VaMs.102 / ATCC MYA-4576 / FGSC 10136) GN=VDBG_01347 PE=3 SV=1	GO:0004721,phosphoprotein phosphatase activity;GO:0046872,metal ion binding	-
c11996_g1	10.4634	0	20.9268	Inf	Inf	9.37e-10	4.46e-09	0	4.76	-	-	-	-	-	-	-	-	-	-	-
c1202_g1	11.5513	0.68099	22.4216	32.925	5.04111	3.67e-09	1.67e-08	0.14	4.63	-	-	-	1e-09 gnl|CDD|228204 KOG0255, KOG0255, KOG0255, Synaptic vesicle transporter SVOP and related transporters (major facilitator superfamily) [General function prediction only].	3e-83 gb|EGY17512.1| polyamine transporter 2 [Verticillium dahliae VdLs.17]	0.0 ref|XM_003005968.1| Verticillium albo-atrum VaMs.102 polyamine transporter 4, mRNA	-	4e-17 sp|O59814|YCT4_SCHPO Uncharacterized transporter C794.04c OS=Schizosaccharomyces pombe (strain 972 / ATCC 24843) GN=SPCC794.04c PE=3 SV=1	4e-83 tr|G2WTS1|G2WTS1_VERDV Polyamine transporter 2 OS=Verticillium dahliae (strain VdLs.17 / ATCC MYA-4575 / FGSC 10137) GN=VDAG_01194 PE=4 SV=1	GO:0016021,integral to membrane;GO:0005886,plasma membrane;GO:0055085,transmembrane transport;GO:0015171,amino acid transmembrane transporter activity	-
c12026_g1	8.52855	1.36198	15.6951	11.5238	3.52654	1.37e-05	4.77e-05	0.48	5.63	-	-	-	-	-	-	-	-	-	-	-
c12029_g1	6.31959	0.68099	11.9582	17.56	4.13422	6.72e-05	0.000218278	0.08	1.41	-	-	-	-	-	-	-	-	-	-	-
c1205_g1	46.1405	65.3751	26.9059	0.411563	-1.28082	1.86e-06	7e-06	9.29	3.85	-	-	-	-	1e-51 gb|EGY19423.1| hypothetical protein VDAG_09625 [Verticillium dahliae VdLs.17]	-	-	-	1e-51 tr|G2XHX5|G2XHX5_VERDV Putative uncharacterized protein OS=Verticillium dahliae (strain VdLs.17 / ATCC MYA-4575 / FGSC 10137) GN=VDAG_09625 PE=4 SV=1	-	-
c12058_g1	7.10017	0	14.2003	Inf	Inf	7.36e-07	2.85e-06	0	1.41	-	-	3e-36 gnl|CDD|221619 pfam12520, DUF3723, Protein of unknown function (DUF3723). This family of proteins is found in eukaryotes. Proteins in this family are typically between 374 and 1069 amino acids in length. There is a conserved LGF sequence motif.	-	5e-94 gb|EGY23465.1| hypothetical protein VDAG_04903 [Verticillium dahliae VdLs.17]	-	7e-37 gnl|CDD|221619 pfam12520, DUF3723, Protein of unknown function (DUF3723). This family of proteins is found in eukaryotes. Proteins in this family are typically between 374 and 1069 amino acids in length. There is a conserved LGF sequence motif.	-	6e-94 tr|G2X3B8|G2X3B8_VERDV Putative uncharacterized protein OS=Verticillium dahliae (strain VdLs.17 / ATCC MYA-4575 / FGSC 10137) GN=VDAG_04903 PE=4 SV=1	-	-
c12079_g1	31.0344	45.6263	16.4425	0.360373	-1.47244	1.01e-05	3.55e-05	1.92	0.69	-	-	-	-	0.0 gb|EGY20361.1| hypothetical protein VDAG_09990 [Verticillium dahliae VdLs.17]	0.0 ref|XM_003007198.1| Verticillium albo-atrum VaMs.102 conserved hypothetical protein, mRNA	-	-	0.0 tr|G2XIK8|G2XIK8_VERDV Putative uncharacterized protein OS=Verticillium dahliae (strain VdLs.17 / ATCC MYA-4575 / FGSC 10137) GN=VDAG_09990 PE=4 SV=1	GO:0016021,integral to membrane;GO:0055085,transmembrane transport	-
c12146_g1	168.492	230.856	106.129	0.45972	-1.12117	5.52e-16	4.43e-15	57.52	26.86	-	-	-	-	-	-	-	-	-	-	-
c12149_g1	60.1408	38.8164	81.4652	2.09873	1.06952	3.27e-06	1.2e-05	8.88	18.9	-	-	-	-	-	-	-	-	-	-	-
c12151_g1	7.1836	13.6198	0.747387	0.054875	-4.18771	2.73e-05	9.23e-05	4.97	0.28	-	-	-	-	7e-78 gb|EGY14742.1| hypothetical protein VDAG_05906 [Verticillium dahliae VdLs.17]	1e-116 ref|XM_003003234.1| Verticillium albo-atrum VaMs.102 predicted protein, mRNA	-	-	9e-78 tr|G2X6X4|G2X6X4_VERDV Putative uncharacterized protein OS=Verticillium dahliae (strain VdLs.17 / ATCC MYA-4575 / FGSC 10137) GN=VDAG_05906 PE=4 SV=1	-	-
c12152_g1	32.8935	7.49089	58.2962	7.78227	2.96019	0	0	4.8	38.62	-	-	-	-	-	-	-	-	-	-	-
c12161_g1	15.9616	25.1966	6.72648	0.26696	-1.90531	9.37e-05	0.000299435	5.03	1.36	-	-	-	-	-	-	-	-	-	-	-
c1218_g1	243.444	119.173	367.714	3.08554	1.62552	6.72e-13	4.48e-12	12.62	39.2	-	-	-	-	-	-	-	-	-	-	-
c12180_g1	7.81436	0.68099	14.9477	21.95	4.45615	4.21e-06	1.54e-05	0.1	2.31	-	-	-	-	-	0.0 gb|GU291303.1| Verticillium dahliae isolate V137I cytochrome oxidase subunit III (cox3) gene, partial cds; tRNA-Lys, tRNA-Gly, tRNA-Asp, and tRNA-Ser genes, complete sequence; and NADH dehydrogenase subunit 6 (nad6) gene, partial cds; mitochondrial	-	-	-	-	-
c1220_g1	446.324	656.475	236.174	0.359761	-1.47489	3.95e-64	8.15e-63	13.7	4.94	-	-	0.0 gnl|CDD|143423 cd07105, ALDH_SaliADH, Salicylaldehyde dehydrogenase, DoxF-like. Salicylaldehyde dehydrogenase (DoxF, SaliADH, EC=1.2.1.65) involved in the upper naphthalene catabolic pathway of Pseudomonas strain C18 and other similar sequences are present in this CD.	3e-133 gnl|CDD|228254 KOG0305, KOG0305, KOG0305, Anaphase promoting complex, Cdc20, Cdh1, and Ama1 subunits [Cell cycle control, cell division, chromosome partitioning, Posttranslational modification, protein turnover, chaperones].	0.0 gb|EGY15236.1| WD repeat-containing protein slp1 [Verticillium dahliae VdLs.17]	0.0 ref|XM_003002765.1| Verticillium albo-atrum VaMs.102 WD repeat-containing protein slp1, mRNA	7e-130 gnl|CDD|215767 pfam00171, Aldedh, Aldehyde dehydrogenase family. This family of dehydrogenases act on aldehyde substrates. Members use NADP as a cofactor. The family includes the following members: The prototypical members are the aldehyde dehydrogenases EC:1.2.1.3. Succinate-semialdehyde dehydrogenase EC:1.2.1.16. Lactaldehyde dehydrogenase EC:1.2.1.22. Benzaldehyde dehydrogenase EC:1.2.1…	3e-157 sp|P78972|SLP1_SCHPO WD repeat-containing protein slp1 OS=Schizosaccharomyces pombe (strain 972 / ATCC 24843) GN=slp1 PE=1 SV=1	0.0 tr|G2X8E9|G2X8E9_VERDV WD repeat-containing protein slp1 OS=Verticillium dahliae (strain VdLs.17 / ATCC MYA-4575 / FGSC 10137) GN=VDAG_06090 PE=4 SV=1	GO:0007092,activation of mitotic anaphase-promoting complex activity;GO:0044732,mitotic spindle pole body;GO:0033314,mitotic DNA replication checkpoint;GO:0034613,cellular protein localization;GO:0007094,mitotic spindle assembly checkpoint;GO:0032153,cell division site;GO:0000070,mitotic sister chromatid segregation;GO:0000778,condensed nuclear chromosome kinetochore;GO:0033597,mitotic checkpoint…	K03363-ko04120,Ubiquitin mediated proteolysis;ko04110,Cell cycle;ko04111,Cell cycle - yeast;ko04113,Meiosis - yeast;ko04114,Oocyte meiosis;ko05203,Viral carcinogenesis;ko05166,HTLV-I infection
c12262_g1	84.4002	131.431	37.3693	0.284326	-1.81438	2.13e-18	1.9e-17	17.31	4.96	-	-	-	-	-	-	-	-	-	-	-
c12275_g1	25.0128	8.17188	41.8537	5.12167	2.35661	4.19e-09	1.9e-08	2.05	10.65	-	-	-	-	-	-	-	-	-	-	-
c1228_g1	672.034	924.785	419.284	0.453386	-1.14119	6.77e-61	1.35e-59	25.52	11.59	VDBG_04713	hypothetical protein	2e-12 gnl|CDD|223861 COG0790, COG0790, FOG: TPR repeat, SEL1 subfamily [General function prediction only].	5e-12 gnl|CDD|229491 KOG1550, KOG1550, KOG1550, Extracellular protein SEL-1 and related proteins [Cell wall/membrane/envelope biogenesis, Posttranslational modification, protein turnover, chaperones, Signal transduction mechanisms].	0.0 ref|XP_003005107.1| conserved hypothetical protein [Verticillium alfalfae VaMs.102] gb|EEY18604.1| conserved hypothetical protein [Verticillium alfalfae VaMs.102]	0.0 ref|XM_003005061.1| Verticillium albo-atrum VaMs.102 conserved hypothetical protein, mRNA	-	4e-17 sp|P38213|DSF2_YEAST Protein DSF2 OS=Saccharomyces cerevisiae (strain ATCC 204508 / S288c) GN=DSF2 PE=1 SV=2	0.0 tr|C9SI31|C9SI31_VERA1 Putative uncharacterized protein OS=Verticillium albo-atrum (strain VaMs.102 / ATCC MYA-4576 / FGSC 10136) GN=VDBG_04713 PE=4 SV=1	-	-
c12289_g1	17.9049	31.3255	4.48432	0.143152	-2.80438	3.74e-08	1.59e-07	11.31	1.66	-	-	-	-	-	-	-	-	-	-	-
c12294_g1	4.48432	0	8.96864	Inf	Inf	0.000131493	0.000411807	0	3.11	-	-	-	-	9e-96 gb|EGY21480.1| hypothetical protein VDAG_10462 [Verticillium dahliae VdLs.17]	1e-140 ref|XM_003000474.1| Verticillium albo-atrum VaMs.102 conserved hypothetical protein, mRNA	-	8e-09 sp|P43388|YDCM_METS1 Uncharacterized protein in dcmA 3'region (Fragment) OS=Methylophilus sp. (strain DM11) PE=4 SV=1	1e-95 tr|G2XJY0|G2XJY0_VERDV Putative uncharacterized protein OS=Verticillium dahliae (strain VdLs.17 / ATCC MYA-4575 / FGSC 10137) GN=VDAG_10462 PE=4 SV=1	-	-
c12302_g1	41.5813	59.2461	23.9164	0.403678	-1.30872	3.98e-06	1.46e-05	9.03	3.68	-	-	-	-	-	-	-	-	-	-	-
c1232_g1	20.0552	10.2149	29.8955	2.92667	1.54926	0.000184448	0.000570124	0.76	2.24	-	-	0.0 gnl|CDD|236027 PRK07483, PRK07483, hypothetical protein; Provisional.	7e-119 gnl|CDD|229346 KOG1404, KOG1404, KOG1404, Alanine-glyoxylate aminotransferase AGT2 [Amino acid transport and metabolism].	0.0 gb|EGY23291.1| acetylornithine aminotransferase [Verticillium dahliae VdLs.17]	0.0 ref|XM_003000253.1| Verticillium albo-atrum VaMs.102 acetylornithine aminotransferase, mRNA	3e-95 gnl|CDD|201078 pfam00202, Aminotran_3, Aminotransferase class-III.	2e-150 sp|O94562|YGD3_SCHPO Uncharacterized aminotransferase C1771.03c OS=Schizosaccharomyces pombe (strain 972 / ATCC 24843) GN=SPBC1773.03c PE=3 SV=1	0.0 tr|G2X3Z2|G2X3Z2_VERDV Acetylornithine aminotransferase OS=Verticillium dahliae (strain VdLs.17 / ATCC MYA-4575 / FGSC 10137) GN=VDAG_04729 PE=3 SV=1	GO:0030170,pyridoxal phosphate binding;GO:0008152,metabolic process;GO:0008483,transaminase activity;GO:0005829,cytosol;GO:0016853,isomerase activity	-
c12338_g1	45.4927	63.3321	27.6533	0.43664	-1.19548	8.77e-06	3.11e-05	7.15	3.14	-	-	-	-	-	2e-72 ref|XM_003000263.1| Verticillium albo-atrum VaMs.102 predicted protein, mRNA	-	-	-	-	-
c1234_g1	397.858	577.48	218.237	0.377913	-1.40387	1.02e-52	1.91e-51	21.02	11.85	VDBG_00110	O-methylsterigmatocystin oxidoreductase	4e-54 gnl|CDD|215689 pfam00067, p450, Cytochrome P450. Cytochrome P450s are haem-thiolate proteins involved in the oxidative degradation of various compounds. They are particularly well known for their role in the degradation of environmental toxins and mutagens. They can be divided into 4 classes, according to the method by which electrons from NAD(P)H are delivered to the catalytic site. Sequen…	1e-58 gnl|CDD|228106 KOG0156, KOG0156, KOG0156, Cytochrome P450 CYP2 subfamily [Secondary metabolites biosynthesis, transport and catabolism].	0.0 ref|XP_003008429.1| O-methylsterigmatocystin oxidoreductase [Verticillium alfalfae VaMs.102] gb|EEY14003.1| O-methylsterigmatocystin oxidoreductase [Verticillium alfalfae VaMs.102]	0.0 ref|XM_003008383.1| Verticillium albo-atrum VaMs.102 O-methylsterigmatocystin oxidoreductase, mRNA	8e-55 gnl|CDD|215689 pfam00067, p450, Cytochrome P450. Cytochrome P450s are haem-thiolate proteins involved in the oxidative degradation of various compounds. They are particularly well known for their role in the degradation of environmental toxins and mutagens. They can be divided into 4 classes, according to the method by which electrons from NAD(P)H are delivered to the catalytic site. Sequen…	4e-117 sp|B8NHY4|ORDA_ASPFN O-methylsterigmatocystin oxidoreductase OS=Aspergillus flavus (strain ATCC 200026 / FGSC A1120 / NRRL 3357 / JCM 12722 / SRRC 167) GN=ordA PE=2 SV=1	0.0 tr|C9S8S6|C9S8S6_VERA1 O-methylsterigmatocystin oxidoreductase OS=Verticillium albo-atrum (strain VaMs.102 / ATCC MYA-4576 / FGSC 10136) GN=VDBG_00110 PE=3 SV=1	GO:0045122,aflatoxin biosynthetic process;GO:0009055,electron carrier activity;GO:0020037,heme binding;GO:0004497,monooxygenase activity;GO:0005506,iron ion binding;GO:0016705,oxidoreductase activity, acting on paired donors, with incorporation or reduction of molecular oxygen	-
c1236_g1	12.1165	19.7487	4.48432	0.227069	-2.1388	0.000208835	0.000642427	1.34	0.31	-	-	8e-37 gnl|CDD|215860 pfam00328, His_Phos_2, Histidine phosphatase superfamily (branch 2). The histidine phosphatase superfamily is so named because catalysis centres on a conserved His residue that is transiently phosphorylated during the catalytic cycle. Other conserved residues contribute to a 'phosphate pocket' and interact with the phospho group of substrate before, during and after its trans…	2e-39 gnl|CDD|229324 KOG1382, KOG1382, KOG1382, Multiple inositol polyphosphate phosphatase [General function prediction only].	0.0 gb|EGY14181.1| acid phosphatase PHO1 [Verticillium dahliae VdLs.17]	0.0 ref|XM_002999702.1| Verticillium albo-atrum VaMs.102 thiamine-repressible acid phosphatase pho4, mRNA	2e-37 gnl|CDD|215860 pfam00328, His_Phos_2, Histidine phosphatase superfamily (branch 2). The histidine phosphatase superfamily is so named because catalysis centres on a conserved His residue that is transiently phosphorylated during the catalytic cycle. Other conserved residues contribute to a 'phosphate pocket' and interact with the phospho group of substrate before, during and after its trans…	5e-30 sp|O60172|PPA3_SCHPO Thiamine-repressible acid phosphatase SPBC21H7.03c OS=Schizosaccharomyces pombe (strain 972 / ATCC 24843) GN=SPBC21H7.03c PE=2 SV=1	0.0 tr|G2X629|G2X629_VERDV Acid phosphatase PHO1 OS=Verticillium dahliae (strain VdLs.17 / ATCC MYA-4575 / FGSC 10137) GN=VDAG_05345 PE=4 SV=1	GO:0009897,external side of plasma membrane;GO:0009277,fungal-type cell wall;GO:0030287,cell wall-bounded periplasmic space;GO:0003993,acid phosphatase activity;GO:0005576,extracellular region;GO:0016311,dephosphorylation	-
c12388_g1	32.2304	51.7553	12.7056	0.245493	-2.02624	4.09e-09	1.86e-08	12.61	3.14	VDBG_08991	hypothetical protein	-	-	3e-84 ref|XP_003000496.1| conserved hypothetical protein [Verticillium alfalfae VaMs.102] gb|EEY22881.1| conserved hypothetical protein [Verticillium alfalfae VaMs.102] gb|EGY23810.1| hypothetical protein VDAG_05248 [Verticillium dahliae VdLs.17]	0.0 ref|XM_003000450.1| Verticillium albo-atrum VaMs.102 conserved hypothetical protein, mRNA	-	-	3e-84 tr|G2X516|G2X516_VERDV Putative uncharacterized protein OS=Verticillium dahliae (strain VdLs.17 / ATCC MYA-4575 / FGSC 10137) GN=VDAG_05248 PE=4 SV=1	-	-
c1240_g1	446.554	260.819	632.289	2.42424	1.27753	8.16e-12	4.87e-11	14.49	35.15	-	-	3e-13 gnl|CDD|219953 pfam08648, DUF1777, Protein of unknown function (DUF1777). This is a family of eukaryotic proteins of unknown function. Some of the proteins in this family are putative nucleic acid binding proteins.	8e-13 gnl|CDD|231201 KOG3263, KOG3263, KOG3263, Nucleic acid binding protein [General function prediction only].	2e-46 gb|EGY18050.1| hypothetical protein VDAG_08384 [Verticillium dahliae VdLs.17]	1e-41 emb|BX842625.1| Neurospora crassa DNA linkage group I BAC clone B16D18	7e-14 gnl|CDD|219953 pfam08648, DUF1777, Protein of unknown function (DUF1777). This is a family of eukaryotic proteins of unknown function. Some of the proteins in this family are putative nucleic acid binding proteins.	-	2e-46 tr|G2XE02|G2XE02_VERDV Putative uncharacterized protein OS=Verticillium dahliae (strain VdLs.17 / ATCC MYA-4575 / FGSC 10137) GN=VDAG_08384 PE=4 SV=1	-	K12846-ko03040,Spliceosome
c1245_g1	1279.86	1725.63	834.084	0.483351	-1.04886	5.29e-98	1.32e-96	56.23	27.24	VDBG_03422	DNA repair helicase RAD3	0.0 gnl|CDD|233047 TIGR00604, rad3, DNA repair helicase (rad3). All proteins in this family for which funcitons are known are DNA-DNA helicases that funciton in the initiation of transcription and nucleotide excision repair as part of the TFIIH complex. This family is based on the phylogenomic analysis of JA Eisen (1999, Ph.D. Thesis, Stanford University) [DNA metabolism, DNA replication, recombi…	0.0 gnl|CDD|229074 KOG1131, KOG1131, KOG1131, RNA polymerase II transcription initiation/nucleotide excision repair factor TFIIH, 5'-3' helicase subunit RAD3 [Transcription, Replication, recombination and repair].	0.0 ref|XP_003007283.1| DNA repair helicase RAD3 [Verticillium alfalfae VaMs.102] gb|EEY17313.1| DNA repair helicase RAD3 [Verticillium alfalfae VaMs.102]	0.0 ref|XM_003007237.1| Verticillium albo-atrum VaMs.102 DNA repair helicase RAD3, mRNA	9e-73 gnl|CDD|191608 pfam06777, DUF1227, Protein of unknown function (DUF1227). This family represents a conserved region within a number of eukaryotic DNA repair helicases (EC:3.6.1.-).	0.0 sp|P26659|RAD15_SCHPO DNA repair helicase rad15 OS=Schizosaccharomyces pombe (strain 972 / ATCC 24843) GN=rad15 PE=1 SV=2	0.0 tr|C9SE89|C9SE89_VERA1 DNA repair helicase RAD3 OS=Verticillium albo-atrum (strain VaMs.102 / ATCC MYA-4576 / FGSC 10136) GN=VDBG_03422 PE=4 SV=1	GO:0006289,nucleotide-excision repair;GO:0051539,4 iron, 4 sulfur cluster binding;GO:0000112,nucleotide-excision repair factor 3 complex;GO:0004003,ATP-dependent DNA helicase activity;GO:0005675,holo TFIIH complex;GO:0043141,ATP-dependent 5'-3' DNA helicase activity;GO:0006367,transcription initiation from RNA polymerase II promoter;GO:0003677,DNA binding;GO:0005524,ATP binding;GO:0000717,nucleot…	K10844-ko03022,Basal transcription factors;ko03420,Nucleotide excision repair
c12452_g1	27.8789	49.0313	6.72648	0.137188	-2.86578	2.51e-12	1.58e-11	23.34	3.29	-	-	-	-	-	-	-	-	-	-	-
c12461_g1	10.4634	0	20.9268	Inf	Inf	9.37e-10	4.46e-09	0	6.31	-	-	-	-	-	-	-	-	-	-	-
c12471_g1	45.4663	10.2149	80.7178	7.902	2.98222	2e-15	1.56e-14	2.99	24.07	-	-	-	-	2e-07 gb|EGY18397.1| transcriptional repressor NF-X1 [Verticillium dahliae VdLs.17]	3e-88 ref|XM_003004864.1| Verticillium albo-atrum VaMs.102 shuttle craft, mRNA	-	-	2e-07 tr|G2XEZ9|G2XEZ9_VERDV Transcriptional repressor NF-X1 OS=Verticillium dahliae (strain VdLs.17 / ATCC MYA-4575 / FGSC 10137) GN=VDAG_08731 PE=4 SV=1	GO:0003700,sequence-specific DNA binding transcription factor activity;GO:0008270,zinc ion binding;GO:0005634,nucleus;GO:0003676,nucleic acid binding	-
c1253_g1	159.714	219.279	100.15	0.456724	-1.13061	1.92e-15	1.5e-14	13.62	6.25	-	-	3e-61 gnl|CDD|215860 pfam00328, His_Phos_2, Histidine phosphatase superfamily (branch 2). The histidine phosphatase superfamily is so named because catalysis centres on a conserved His residue that is transiently phosphorylated during the catalytic cycle. Other conserved residues contribute to a 'phosphate pocket' and interact with the phospho group of substrate before, during and after its trans…	1e-31 gnl|CDD|229324 KOG1382, KOG1382, KOG1382, Multiple inositol polyphosphate phosphatase [General function prediction only].	0.0 gb|EGY13892.1| 3-phytase A [Verticillium dahliae VdLs.17]	1e-166 ref|XM_003009231.1| Verticillium albo-atrum VaMs.102 3-phytase B, mRNA	7e-62 gnl|CDD|215860 pfam00328, His_Phos_2, Histidine phosphatase superfamily (branch 2). The histidine phosphatase superfamily is so named because catalysis centres on a conserved His residue that is transiently phosphorylated during the catalytic cycle. Other conserved residues contribute to a 'phosphate pocket' and interact with the phospho group of substrate before, during and after its trans…	4e-141 sp|O00107|PHYA_THIHE 3-phytase A OS=Thielavia heterothallica GN=PHYA PE=1 SV=1	0.0 tr|G2WQD2|G2WQD2_VERDV 3-phytase A OS=Verticillium dahliae (strain VdLs.17 / ATCC MYA-4575 / FGSC 10137) GN=VDAG_00574 PE=4 SV=1	GO:0003993,acid phosphatase activity;GO:0005576,extracellular region;GO:0016311,dephosphorylation;GO:0016158,3-phytase activity	-
c12615_g1	100.324	4.08594	196.563	48.1071	5.58818	0	0	0.42	20.37	VDBG_09923	hypothetical protein	-	-	5e-20 ref|XP_002999883.1| conserved hypothetical protein [Verticillium alfalfae VaMs.102] gb|EEY23813.1| conserved hypothetical protein [Verticillium alfalfae VaMs.102]	1e-129 ref|XM_002999837.1| Verticillium albo-atrum VaMs.102 conserved hypothetical protein, mRNA	-	-	6e-20 tr|C9SYE8|C9SYE8_VERA1 Putative uncharacterized protein OS=Verticillium albo-atrum (strain VaMs.102 / ATCC MYA-4576 / FGSC 10136) GN=VDBG_09923 PE=4 SV=1	GO:0000981,sequence-specific DNA binding RNA polymerase II transcription factor activity;GO:0003677,DNA binding;GO:0006357,regulation of transcription from RNA polymerase II promoter;GO:0008270,zinc ion binding;GO:0005634,nucleus;GO:0006366,transcription from RNA polymerase II promoter;GO:0046872,metal ion binding	-
c12621_g1	8.86905	2.04297	15.6951	7.6825	2.94158	6.22e-05	0.000203203	0.98	7.72	-	-	-	-	-	-	-	-	-	-	-
c1266_g1	1694.48	671.456	2717.5	4.04717	2.01691	0	0	32.35	131.42	-	-	2e-24 gnl|CDD|238345 cd00632, Prefoldin_beta, Prefoldin beta; Prefoldin is a hexameric molecular chaperone complex, composed of two evolutionarily related subunits (alpha and beta), which are found in both eukaryotes and archaea. Prefoldin binds and stabilizes newly synthesized polypeptides allowing them to fold correctly. The hexameric structure consists of a double beta barrel assembly with six…	3e-29 gnl|CDD|231416 KOG3478, KOG3478, KOG3478, Prefoldin subunit 6, KE2 family [Posttranslational modification, protein turnover, chaperones].	2e-119 gb|EGY20157.1| hypothetical protein VDAG_02173 [Verticillium dahliae VdLs.17]	0.0 ref|XM_003007085.1| Verticillium albo-atrum VaMs.102 conserved hypothetical protein, mRNA	9e-21 gnl|CDD|202045 pfam01920, Prefoldin_2, Prefoldin subunit. This family includes prefoldin subunits that are not detected by pfam02996.	4e-16 sp|P52553|PFD6_YEAST Prefoldin subunit 6 OS=Saccharomyces cerevisiae (strain ATCC 204508 / S288c) GN=YKE2 PE=1 SV=1	3e-119 tr|G2WV32|G2WV32_VERDV Putative uncharacterized protein OS=Verticillium dahliae (strain VdLs.17 / ATCC MYA-4575 / FGSC 10137) GN=VDAG_02173 PE=4 SV=1	GO:0007021,tubulin complex assembly;GO:0016272,prefoldin complex;GO:0006457,protein folding;GO:0015631,tubulin binding;GO:0005634,nucleus	K04798
c1275_g1	1129.37	420.171	1838.57	4.37577	2.12954	1.95e-11	1.1e-10	14.12	62	-	-	3e-75 gnl|CDD|176540 cd08598, PI-PLC1c_yeast, Catalytic domain of putative yeast phosphatidylinositide-specific phospholipases C. This family corresponds to the catalytic domain present in a group of putative phosphoinositide-specific phospholipase C (PI-PLC, EC 3.1.4.11) encoded by PLC1 genes from yeasts, which are homologs of the delta isoforms of mammalian PI-PLC in terms of overall sequence s…	8e-77 gnl|CDD|228118 KOG0169, KOG0169, KOG0169, Phosphoinositide-specific phospholipase C [Signal transduction mechanisms].	0.0 gb|EGY14985.1| 1-phosphatidylinositol-4,5-bisphosphate phosphodiesterase gamma-2 [Verticillium dahliae VdLs.17]	0.0 ref|XM_003000976.1| Verticillium albo-atrum VaMs.102 1-phosphatidylinositol-4,5-bisphosphate phosphodiesterase delta-3, mRNA	9e-50 gnl|CDD|215891 pfam00387, PI-PLC-Y, Phosphatidylinositol-specific phospholipase C, Y domain. This associates with pfam00388 to form a single structural unit.	1e-45 sp|P40977|PLC1_SCHPO 1-phosphatidylinositol 4,5-bisphosphate phosphodiesterase 1 OS=Schizosaccharomyces pombe (strain 972 / ATCC 24843) GN=plc1 PE=1 SV=1	0.0 tr|G2X7L7|G2X7L7_VERDV 1-phosphatidylinositol-4,5-bisphosphate phosphodiesterase gamma-2 OS=Verticillium dahliae (strain VdLs.17 / ATCC MYA-4575 / FGSC 10137) GN=VDAG_06475 PE=4 SV=1	GO:0071585,detoxification of cadmium ion;GO:0034644,cellular response to UV;GO:0004871,signal transducer activity;GO:0071276,cellular response to cadmium ion;GO:0048017,inositol lipid-mediated signaling;GO:0005622,intracellular;GO:0006629,lipid metabolic process;GO:0035556,intracellular signal transduction;GO:0005829,cytosol;GO:0005634,nucleus;GO:0004435,phosphatidylinositol phospholipase C activ…	-
c12787_g1	15.6951	0	31.3902	Inf	Inf	2.95e-14	2.16e-13	0	10.31	-	-	-	-	-	-	-	-	-	-	-
c12848_g1	7.78117	1.36198	14.2003	10.4263	3.38215	5.08e-05	0.000167165	0.34	3.58	-	-	-	-	-	-	-	-	-	-	-
c12864_g1	6.69328	0.68099	12.7056	18.6575	4.22168	3.37e-05	0.000113072	0.11	2.12	-	-	-	-	1e-48 gb|EGY22437.1| hypothetical protein VDAG_03875 [Verticillium dahliae VdLs.17]	7e-111 ref|XM_003006784.1| Verticillium albo-atrum VaMs.102 conserved hypothetical protein, mRNA	-	-	1e-48 tr|G2X0U6|G2X0U6_VERDV Putative uncharacterized protein OS=Verticillium dahliae (strain VdLs.17 / ATCC MYA-4575 / FGSC 10137) GN=VDAG_03875 PE=4 SV=1	GO:0009058,biosynthetic process;GO:0016779,nucleotidyltransferase activity	-
c1288_g1	60.2915	81.7188	38.8641	0.475583	-1.07223	3.58e-06	1.32e-05	9.76	4.68	-	-	-	-	4e-78 gb|EGY20376.1| hypothetical protein VDAG_10005 [Verticillium dahliae VdLs.17]	2e-157 ref|XM_003007212.1| Verticillium albo-atrum VaMs.102 predicted protein, mRNA	-	-	4e-78 tr|G2XIM3|G2XIM3_VERDV Putative uncharacterized protein OS=Verticillium dahliae (strain VdLs.17 / ATCC MYA-4575 / FGSC 10137) GN=VDAG_10005 PE=4 SV=1	-	-
c12898_g1	42.0869	25.8776	58.2962	2.25276	1.1717	2.31e-05	7.88e-05	3.57	8.11	-	-	-	-	7e-76 gb|EGY23728.1| hypothetical protein VDAG_05166 [Verticillium dahliae VdLs.17]	-	-	-	8e-76 tr|G2X4T4|G2X4T4_VERDV Putative uncharacterized protein OS=Verticillium dahliae (strain VdLs.17 / ATCC MYA-4575 / FGSC 10137) GN=VDAG_05166 PE=4 SV=1	-	-
c1301_g1	1873.26	2546.22	1200.3	0.471406	-1.08496	1.05e-151	3.1e-150	48.05	22.68	-	-	-	-	0.0 gb|EGY23838.1| hypothetical protein VDAG_05276 [Verticillium dahliae VdLs.17]	0.0 ref|XM_002999634.1| Verticillium albo-atrum VaMs.102 predicted protein, mRNA	-	-	0.0 tr|G2X544|G2X544_VERDV Putative uncharacterized protein OS=Verticillium dahliae (strain VdLs.17 / ATCC MYA-4575 / FGSC 10137) GN=VDAG_05276 PE=4 SV=1	-	-
c1302_g1	58.1642	33.3685	82.9599	2.48617	1.31393	3.17e-08	1.35e-07	1.08	2.69	VDBG_06184	phosphate-repressible phosphate permease	6e-32 gnl|CDD|216469 pfam01384, PHO4, Phosphate transporter family. This family includes PHO-4 from Neurospora crassa which is a is a Na(+)-phosphate symporter. This family also contains the leukaemia virus receptor.	2e-43 gnl|CDD|230432 KOG2493, KOG2493, KOG2493, Na+/Pi symporter [Inorganic ion transport and metabolism].	0.0 ref|XP_003003742.1| phosphate-repressible phosphate permease [Verticillium alfalfae VaMs.102] gb|EEY20075.1| phosphate-repressible phosphate permease [Verticillium alfalfae VaMs.102]	0.0 ref|XM_003003696.1| Verticillium albo-atrum VaMs.102 phosphate-repressible phosphate permease, mRNA	1e-32 gnl|CDD|216469 pfam01384, PHO4, Phosphate transporter family. This family includes PHO-4 from Neurospora crassa which is a is a Na(+)-phosphate symporter. This family also contains the leukaemia virus receptor.	0.0 sp|P15710|PHO4_NEUCR Phosphate-repressible phosphate permease OS=Neurospora crassa (strain ATCC 24698 / 74-OR23-1A / CBS 708.71 / DSM 1257 / FGSC 987) GN=pho-4 PE=3 SV=1	0.0 tr|C9SMR0|C9SMR0_VERA1 Phosphate-repressible phosphate permease OS=Verticillium albo-atrum (strain VaMs.102 / ATCC MYA-4576 / FGSC 10136) GN=VDBG_06184 PE=4 SV=1	GO:0016020,membrane;GO:0006817,phosphate ion transport;GO:0015293,symporter activity;GO:0016021,integral to membrane;GO:0005315,inorganic phosphate transmembrane transporter activity	K14640
c1308_g1	541.147	811.74	270.554	0.333301	-1.5851	1.85e-87	4.38e-86	41.31	13.83	-	-	1e-33 gnl|CDD|217024 pfam02417, Chromate_transp, Chromate transporter. Members of this family probably act as chromate transporters. Members of this family are found in both bacteria and archaebacteria. The proteins are composed of one or two copies of this region. The alignment contains two conserved motifs, FGG and PGP.	-	0.0 gb|EGY20252.1| chromate transporter [Verticillium dahliae VdLs.17]	0.0 ref|XM_003001994.1| Verticillium albo-atrum VaMs.102 chromate transporter, mRNA	3e-34 gnl|CDD|217024 pfam02417, Chromate_transp, Chromate transporter. Members of this family probably act as chromate transporters. Members of this family are found in both bacteria and archaebacteria. The proteins are composed of one or two copies of this region. The alignment contains two conserved motifs, FGG and PGP.	7e-06 sp|P14285|CHRA_PSEAI Chromate transport protein OS=Pseudomonas aeruginosa GN=chrA PE=2 SV=1	0.0 tr|G2WVC7|G2WVC7_VERDV Chromate transporter OS=Verticillium dahliae (strain VdLs.17 / ATCC MYA-4575 / FGSC 10137) GN=VDAG_02268 PE=4 SV=1	GO:0016021,integral to membrane;GO:0005886,plasma membrane;GO:0046687,response to chromate;GO:0015109,chromate transmembrane transporter activity	-
c1319_g1	9.24274	2.04297	16.4425	8.04833	3.00869	3.34e-05	0.000111859	0.33	2.7	-	-	-	-	-	-	-	-	-	-	-
c132_g1	68.7349	8.17188	129.298	15.8223	3.98389	0	0	0.63	9.96	-	-	-	-	-	-	-	-	-	-	-
c1321_g1	38.0674	16.3438	59.7909	3.65833	1.87119	1.26e-09	5.96e-09	3.67	13.62	-	-	-	-	-	-	-	-	-	-	-
c13357_g1	4291.23	2427.73	6154.73	2.53518	1.34209	1.23e-10	6.43e-10	78.71	199.96	-	-	-	-	5e-167 gb|EGY22206.1| hypothetical protein VDAG_03644 [Verticillium dahliae VdLs.17]	0.0 ref|XM_003006539.1| Verticillium albo-atrum VaMs.102 conserved hypothetical protein, mRNA	-	-	6e-167 tr|G2X1N3|G2X1N3_VERDV Putative uncharacterized protein OS=Verticillium dahliae (strain VdLs.17 / ATCC MYA-4575 / FGSC 10137) GN=VDAG_03644 PE=4 SV=1	-	-
c13362_g2	151.85	204.297	99.4024	0.486558	-1.03932	7.85e-13	5.21e-12	178.73	90.59	-	-	-	-	4e-06 gb|EGY16631.1| hypothetical protein VDAG_07795 [Verticillium dahliae VdLs.17]	3e-71 ref|XM_003009723.1| Verticillium albo-atrum VaMs.102 predicted protein, mRNA	-	-	4e-06 tr|G2XCB3|G2XCB3_VERDV Putative uncharacterized protein OS=Verticillium dahliae (strain VdLs.17 / ATCC MYA-4575 / FGSC 10137) GN=VDAG_07795 PE=4 SV=1	-	-
c13366_g1	619.567	283.973	955.16	3.36356	1.74999	7.32e-12	4.4e-11	25.24	85.36	-	-	-	-	1e-94 gb|EGY19547.1| hypothetical protein VDAG_09881 [Verticillium dahliae VdLs.17]	0.0 ref|XM_003005505.1| Verticillium albo-atrum VaMs.102 predicted protein, mRNA	-	-	1e-94 tr|G2XI99|G2XI99_VERDV Putative uncharacterized protein OS=Verticillium dahliae (strain VdLs.17 / ATCC MYA-4575 / FGSC 10137) GN=VDAG_09881 PE=4 SV=1	-	-
c13378_g1	23029.8	31715.8	14343.8	0.452263	-1.14477	0	0	1038.75	470.76	-	-	1e-100 gnl|CDD|224883 COG1972, NupC, Nucleoside permease [Nucleotide transport and metabolism].	1e-99 gnl|CDD|231679 KOG3747, KOG3747, KOG3747, Concentrative Na+-nucleoside cotransporter CNT1/CNT2 [Nucleotide transport and metabolism, Inorganic ion transport and metabolism].	0.0 gb|EGY20565.1| sodium/nucleoside cotransporter [Verticillium dahliae VdLs.17]	0.0 ref|XM_003001129.1| Verticillium albo-atrum VaMs.102 sodium/nucleoside cotransporter, mRNA	2e-68 gnl|CDD|219502 pfam07662, Nucleos_tra2_C, Na+ dependent nucleoside transporter C-terminus. This family consists of nucleoside transport proteins. Rat CNT 2 is a purine-specific Na+-nucleoside cotransporter localised to the bile canalicular membrane. CNT 1 is a a Na+-dependent nucleoside transporter selective for pyrimidine nucleosides and adenosine it also transports the anti-viral nucleosi…	9e-69 sp|Q9UA35|S28A3_EPTST Solute carrier family 28 member 3 OS=Eptatretus stoutii GN=SLC28A3 PE=2 SV=1	0.0 tr|G2XJ62|G2XJ62_VERDV Sodium/nucleoside cotransporter OS=Verticillium dahliae (strain VdLs.17 / ATCC MYA-4575 / FGSC 10137) GN=VDAG_10194 PE=4 SV=1	GO:0016020,membrane;GO:0016021,integral to membrane;GO:0005415,nucleoside:sodium symporter activity	K03317
c13399_g1	265.989	377.269	154.709	0.410077	-1.28603	7.73e-31	1.01e-29	18.87	7.76	VDBG_02481	hypothetical protein	3e-13 gnl|CDD|215605 PLN03153, PLN03153, hypothetical protein; Provisional.	-	0.0 ref|XP_003008293.1| conserved hypothetical protein [Verticillium alfalfae VaMs.102] gb|EEY16372.1| conserved hypothetical protein [Verticillium alfalfae VaMs.102]	0.0 ref|XM_003008247.1| Verticillium albo-atrum VaMs.102 conserved hypothetical protein, mRNA	6e-07 gnl|CDD|190308 pfam02434, Fringe, Fringe-like. The drosophila protein fringe (FNG) is a glucosaminyltransferase that controls the response of the Notch receptor to specific ligands. FNG is localised to the Golgi apparatus (not secreted as previously thought). Modification of Notch occurs through glycosylation by FNG. The xenopus homologue, lunatic fringe, has been implicated in a variety of…	-	0.0 tr|C9SB12|C9SB12_VERA1 Putative uncharacterized protein OS=Verticillium albo-atrum (strain VaMs.102 / ATCC MYA-4576 / FGSC 10136) GN=VDBG_02481 PE=4 SV=1	-	-
c13400_g1	19772.1	1065.75	38478.5	36.1046	5.17411	0	0	55.59	2013.57	-	-	-	-	3e-59 gb|EGY23679.1| surface protein [Verticillium dahliae VdLs.17]	3e-13 ref|XM_001907591.1| Podospora anserina S mat+ hypothetical protein (PODANSg4660) partial mRNA	-	-	3e-59 tr|G2X4N5|G2X4N5_VERDV Surface protein OS=Verticillium dahliae (strain VdLs.17 / ATCC MYA-4575 / FGSC 10137) GN=VDAG_05117 PE=4 SV=1	-	-
c13437_g1	1028.41	1379.69	677.132	0.490787	-1.02683	4.16e-76	9.34e-75	48.54	23.88	-	-	2e-98 gnl|CDD|214567 smart00220, S_TKc, Serine/Threonine protein kinases, catalytic domain. Phosphotransferases. Serine or threonine-specific kinase subfamily.	3e-109 gnl|CDD|228531 KOG0583, KOG0583, KOG0583, Serine/threonine protein kinase [Signal transduction mechanisms].	0.0 gb|EGY18287.1| carbon catabolite-derepressing protein kinase [Verticillium dahliae VdLs.17]	0.0 ref|XM_003008601.1| Verticillium albo-atrum VaMs.102 carbon catabolite-derepressing protein kinase, mRNA	5e-86 gnl|CDD|215690 pfam00069, Pkinase, Protein kinase domain.	4e-159 sp|P06782|SNF1_YEAST Carbon catabolite-derepressing protein kinase OS=Saccharomyces cerevisiae (strain ATCC 204508 / S288c) GN=SNF1 PE=1 SV=1	0.0 tr|G2XEN6|G2XEN6_VERDV Carbon catabolite-derepressing protein kinase OS=Verticillium dahliae (strain VdLs.17 / ATCC MYA-4575 / FGSC 10137) GN=VDAG_08621 PE=4 SV=1	GO:0007124,pseudohyphal growth;GO:0001403,invasive growth in response to glucose limitation;GO:0017148,negative regulation of translation;GO:0004679,AMP-activated protein kinase activity;GO:0005641,nuclear envelope lumen;GO:0031965,nuclear membrane;GO:0007165,signal transduction;GO:0007155,cell adhesion;GO:0001302,replicative cell aging;GO:0031588,AMP-activated protein kinase complex;GO:0005524,A…	K12761-ko04113,Meiosis - yeast
c13450_g1	402.865	260.138	545.592	2.09732	1.06855	7.94e-12	4.75e-11	93.6	200.63	-	-	-	-	2e-35 gb|EGY21735.1| FK506-binding protein [Verticillium dahliae VdLs.17]	4e-106 ref|XM_003003527.1| Verticillium albo-atrum VaMs.102 FK506-binding protein, mRNA	-	6e-06 sp|Q7SCN0|FKBP4_NEUCR FK506-binding protein 4 OS=Neurospora crassa (strain ATCC 24698 / 74-OR23-1A / CBS 708.71 / DSM 1257 / FGSC 987) GN=fpr-4 PE=3 SV=1	2e-35 tr|G2WYT3|G2WYT3_VERDV Peptidyl-prolyl cis-trans isomerase OS=Verticillium dahliae (strain VdLs.17 / ATCC MYA-4575 / FGSC 10137) GN=VDAG_03175 PE=4 SV=1	GO:0016020,membrane;GO:0006457,protein folding;GO:0005528,FK506 binding;GO:0003755,peptidyl-prolyl cis-trans isomerase activity;GO:0005730,nucleolus;GO:0000412,histone peptidyl-prolyl isomerization	-
c13460_g1	44.787	70.142	19.4321	0.277039	-1.85184	1.02e-10	5.39e-10	16.89	4.75	-	-	-	-	-	-	-	-	-	-	-
c13466_g1	983.308	1361.98	604.636	0.443939	-1.17157	1.52e-92	3.69e-91	63.34	28.2	-	-	4e-29 gnl|CDD|146488 pfam03881, Fructosamin_kin, Fructosamine kinase. This family includes eukaryotic fructosamine-3-kinase enzymes. The family also includes bacterial members that have not been characterized but probably have a similar or identical function.	4e-29 gnl|CDD|230959 KOG3021, KOG3021, KOG3021, Predicted kinase [General function prediction only].	7e-174 gb|EKJ72276.1| hypothetical protein FPSE_07547 [Fusarium pseudograminearum CS3096]	-	9e-30 gnl|CDD|146488 pfam03881, Fructosamin_kin, Fructosamine kinase. This family includes eukaryotic fructosamine-3-kinase enzymes. The family also includes bacterial members that have not been characterized but probably have a similar or identical function.	1e-29 sp|Q12362|RIB2_YEAST Bifunctional protein RIB2 OS=Saccharomyces cerevisiae (strain ATCC 204508 / S288c) GN=RIB2 PE=1 SV=1	8e-174 tr|K3UJZ4|K3UJZ4_FUSPC Uncharacterized protein OS=Fusarium pseudograminearum (strain CS3096) GN=FPSE_07547 PE=4 SV=1	GO:0005737,cytoplasm;GO:0043723,2,5-diamino-6-ribitylamino-4(3H)-pyrimidinone 5'-phosphate deaminase activity;GO:0008835,diaminohydroxyphosphoribosylaminopyrimidine deaminase activity;GO:0031119,tRNA pseudouridine synthesis;GO:0003723,RNA binding;GO:0009231,riboflavin biosynthetic process;GO:0008270,zinc ion binding;GO:0009982,pseudouridine synthase activity;GO:0046872,metal ion binding;GO:001677…	-
c13469_g1	1583.73	45.6263	3121.83	68.4218	6.09638	0	0	3.73	256.32	VDBG_05252	hypothetical protein	-	-	0.0 ref|XP_003004139.1| conserved hypothetical protein [Verticillium alfalfae VaMs.102] gb|EEY19143.1| conserved hypothetical protein [Verticillium alfalfae VaMs.102]	0.0 ref|XM_003004093.1| Verticillium albo-atrum VaMs.102 conserved hypothetical protein, mRNA	-	-	0.0 tr|C9SKC5|C9SKC5_VERA1 Putative uncharacterized protein OS=Verticillium albo-atrum (strain VaMs.102 / ATCC MYA-4576 / FGSC 10136) GN=VDBG_05252 PE=4 SV=1	-	-
c13476_g1	676.711	974.497	378.925	0.388842	-1.36274	5.91e-84	1.38e-82	44.29	17.27	VDBG_02901	pantothenate transporter liz1	8e-56 gnl|CDD|233174 TIGR00893, 2A0114, D-galactonate transporter. [Transport and binding proteins, Carbohydrates, organic alcohols, and acids].	4e-107 gnl|CDD|230472 KOG2533, KOG2533, KOG2533, Permease of the major facilitator superfamily [Carbohydrate transport and metabolism].	0.0 ref|XP_003006762.1| pantothenate transporter liz1 [Verticillium alfalfae VaMs.102] gb|EEY16792.1| pantothenate transporter liz1 [Verticillium alfalfae VaMs.102] gb|EGY22373.1| pantothenate transporter liz1 [Verticillium dahliae VdLs.17]	0.0 ref|XM_003006716.1| Verticillium albo-atrum VaMs.102 pantothenate transporter liz1, mRNA	4e-41 gnl|CDD|219516 pfam07690, MFS_1, Major Facilitator Superfamily.	5e-68 sp|Q9US44|YIZG_SCHPO Uncharacterized transporter C1002.16c OS=Schizosaccharomyces pombe (strain 972 / ATCC 24843) GN=SPAC1002.16c PE=3 SV=1	0.0 tr|G2X0N2|G2X0N2_VERDV Pantothenate transporter liz1 OS=Verticillium dahliae (strain VdLs.17 / ATCC MYA-4575 / FGSC 10137) GN=VDAG_03811 PE=4 SV=1	GO:0005887,integral to plasma membrane;GO:0035353,nicotinamide mononucleotide transmembrane transport;GO:0032153,cell division site;GO:0016021,integral to membrane;GO:0055085,transmembrane transport;GO:0051286,cell tip;GO:0005794,Golgi apparatus;GO:0015663,nicotinamide mononucleotide transmembrane transporter activity	-
c13483_g1	723.595	1216.25	230.943	0.189881	-2.39683	2.46e-223	7.87e-222	51.38	9.78	-	-	5e-106 gnl|CDD|215702 pfam00083, Sugar_tr, Sugar (and other) transporter.	2e-100 gnl|CDD|228203 KOG0254, KOG0254, KOG0254, Predicted transporter (major facilitator superfamily) [General function prediction only].	0.0 gb|EGY20073.1| quinate permease [Verticillium dahliae VdLs.17]	0.0 ref|XM_003006995.1| Verticillium albo-atrum VaMs.102 quinate permease, mRNA	1e-106 gnl|CDD|215702 pfam00083, Sugar_tr, Sugar (and other) transporter.	3e-100 sp|Q4U3U4|QAY_NEUTR Quinate permease OS=Neurospora terricola GN=qa-y PE=3 SV=1	0.0 tr|G2WUU8|G2WUU8_VERDV Quinate permease OS=Verticillium dahliae (strain VdLs.17 / ATCC MYA-4575 / FGSC 10137) GN=VDAG_02089 PE=3 SV=1	GO:0022891,substrate-specific transmembrane transporter activity;GO:0019630,quinate metabolic process;GO:0016021,integral to membrane	-
c13492_g1	767.637	1048.72	486.549	0.463943	-1.10798	1.03e-65	2.14e-64	34.76	16.16	-	-	3e-06 gnl|CDD|214501 smart00066, GAL4, GAL4-like Zn(II)2Cys6 (or C6 zinc) binuclear cluster DNA-binding domain. Gal4 is a positive regulator for the gene expression of the galactose- induced genes of S. cerevisiae. Is present only in fungi.	-	4e-131 emb|CCF34120.1| hypothetical protein CH063_06178 [Colletotrichum higginsianum]	0.0 ref|XM_003008985.1| Verticillium albo-atrum VaMs.102 conserved hypothetical protein, mRNA	4e-06 gnl|CDD|201056 pfam00172, Zn_clus, Fungal Zn(2)-Cys(6) binuclear cluster domain.	1e-10 sp|O93870|FCR1_CANAX Fluconazole resistance protein 1 OS=Candida albicans GN=FCR1 PE=4 SV=1	5e-131 tr|H1V1L8|H1V1L8_COLHI Uncharacterized protein OS=Colletotrichum higginsianum (strain IMI 349063) GN=CH063_06178 PE=4 SV=1	GO:0000981,sequence-specific DNA binding RNA polymerase II transcription factor activity;GO:0003700,sequence-specific DNA binding transcription factor activity;GO:0003677,DNA binding;GO:0006357,regulation of transcription from RNA polymerase II promoter;GO:0008270,zinc ion binding;GO:0005634,nucleus;GO:0006366,transcription from RNA polymerase II promoter;GO:0046872,metal ion binding	-
c13495_g1	216.546	394.974	38.1167	0.0965043	-3.37326	1.78e-104	4.58e-103	23.26	2.25	-	-	2e-99 gnl|CDD|233165 TIGR00879, SP, MFS transporter, sugar porter (SP) family. This model represent the sugar porter subfamily of the major facilitator superfamily (pfam00083) [Transport and binding proteins, Carbohydrates, organic alcohols, and acids].	4e-79 gnl|CDD|228203 KOG0254, KOG0254, KOG0254, Predicted transporter (major facilitator superfamily) [General function prediction only].	0.0 gb|EGY17122.1| alpha-glucosides permease MPH2/3 [Verticillium dahliae VdLs.17]	0.0 ref|XM_003001526.1| Verticillium albo-atrum VaMs.102 maltose permease MAL61, mRNA	1e-89 gnl|CDD|215702 pfam00083, Sugar_tr, Sugar (and other) transporter.	2e-106 sp|P53048|MAL11_YEAST General alpha-glucoside permease OS=Saccharomyces cerevisiae (strain ATCC 204508 / S288c) GN=MAL11 PE=1 SV=1	0.0 tr|G2XDQ4|G2XDQ4_VERDV Alpha-glucosides permease MPH2/3 OS=Verticillium dahliae (strain VdLs.17 / ATCC MYA-4575 / FGSC 10137) GN=VDAG_08286 PE=3 SV=1	GO:0000023,maltose metabolic process;GO:0005364,maltose:hydrogen symporter activity;GO:0015574,trehalose transmembrane transporter activity;GO:0005352,alpha-glucoside:hydrogen symporter activity;GO:0022891,substrate-specific transmembrane transporter activity;GO:0046352,disaccharide catabolic process;GO:0016021,integral to membrane;GO:0005886,plasma membrane	K08141
c135_g1	171.831	239.028	104.634	0.437749	-1.19182	4.99e-18	4.41e-17	19.68	8.68	VDBG_05359	signal recognition particle sec65 subunit	9e-31 gnl|CDD|216787 pfam01922, SRP19, SRP19 protein. The signal recognition particle (SRP) binds to the signal peptide of proteins as they are being translated. The binding of the SRP halts translation and the complex is then transported to the endoplasmic reticulum's cytoplasmic surface. The SRP then aids translocation of the protein through the ER membrane. The SRP is a ribonucleoprotein that …	5e-25 gnl|CDD|231136 KOG3198, KOG3198, KOG3198, Signal recognition particle, subunit Srp19 [Intracellular trafficking, secretion, and vesicular transport].	9e-174 ref|XP_003004246.1| signal recognition particle sec65 subunit [Verticillium alfalfae VaMs.102] gb|EEY19250.1| signal recognition particle sec65 subunit [Verticillium alfalfae VaMs.102]	0.0 ref|XM_003004200.1| Verticillium albo-atrum VaMs.102 signal recognition particle sec65 subunit, mRNA	2e-31 gnl|CDD|216787 pfam01922, SRP19, SRP19 protein. The signal recognition particle (SRP) binds to the signal peptide of proteins as they are being translated. The binding of the SRP halts translation and the complex is then transported to the endoplasmic reticulum's cytoplasmic surface. The SRP then aids translocation of the protein through the ER membrane. The SRP is a ribonucleoprotein that …	2e-37 sp|P41922|SEC65_YARLI Signal recognition particle SEC65 subunit OS=Yarrowia lipolytica (strain CLIB 122 / E 150) GN=SEC65 PE=3 SV=1	1e-173 tr|C9SKN2|C9SKN2_VERA1 Signal recognition particle sec65 subunit OS=Verticillium albo-atrum (strain VaMs.102 / ATCC MYA-4576 / FGSC 10136) GN=VDBG_05359 PE=4 SV=1	GO:0005786,signal recognition particle, endoplasmic reticulum targeting;GO:0006614,SRP-dependent cotranslational protein targeting to membrane;GO:0048500,signal recognition particle;GO:0008312,7S RNA binding	K03105-ko03060,Protein export
c1350_g1	4706.27	2461.1	6951.44	2.82453	1.49801	1.15e-10	6.03e-10	48.12	136.09	-	-	-	-	2e-62 gb|EGY18382.1| hypothetical protein VDAG_08716 [Verticillium dahliae VdLs.17]	0.0 ref|XM_003004841.1| Verticillium albo-atrum VaMs.102 conserved hypothetical protein, mRNA	3e-06 gnl|CDD|221469 pfam12223, DUF3602, Protein of unknown function (DUF3602). This domain family is found in eukaryotes, and is typically between 78 and 89 amino acids in length.	-	3e-62 tr|G2XEY4|G2XEY4_VERDV Putative uncharacterized protein OS=Verticillium dahliae (strain VdLs.17 / ATCC MYA-4575 / FGSC 10137) GN=VDAG_08716 PE=4 SV=1	-	-
c13507_g1	222.688	299.636	145.74	0.486392	-1.03981	3.82e-18	3.38e-17	24.8	12.13	-	-	1e-170 gnl|CDD|233718 TIGR02089, TTC, tartrate dehydrogenase. Tartrate dehydrogenase catalyzes the oxidation of both meso- and (+)-tartrate as well as a D-malate. These enzymes are closely related to the 3-isopropylmalate and isohomocitrate dehydrogenases found in TIGR00169 and TIGR02088, respectively [Energy metabolism, Other].	2e-67 gnl|CDD|228732 KOG0785, KOG0785, KOG0785, Isocitrate dehydrogenase, alpha subunit [Amino acid transport and metabolism].	0.0 gb|EGY16140.1| tartrate dehydrogenase/decarboxylase [Verticillium dahliae VdLs.17]	0.0 ref|XM_003000612.1| Verticillium albo-atrum VaMs.102 tartrate dehydrogenase/decarboxylase, mRNA	4e-85 gnl|CDD|215773 pfam00180, Iso_dh, Isocitrate/isopropylmalate dehydrogenase.	7e-165 sp|P70792|TTUC4_AGRVI Probable tartrate dehydrogenase/decarboxylase TtuC' OS=Agrobacterium vitis GN=ttuC' PE=2 SV=1	0.0 tr|G2XAM4|G2XAM4_VERDV Tartrate dehydrogenase/decarboxylase OS=Verticillium dahliae (strain VdLs.17 / ATCC MYA-4575 / FGSC 10137) GN=VDAG_07304 PE=3 SV=1	GO:0050319,tartrate decarboxylase activity;GO:0005737,cytoplasm;GO:0016616,oxidoreductase activity, acting on the CH-OH group of donors, NAD or NADP as acceptor;GO:0000287,magnesium ion binding;GO:0046553,D-malate dehydrogenase (decarboxylating) activity;GO:0009027,tartrate dehydrogenase activity;GO:0051287,NAD binding	-
c13513_g1	12.1991	2.72396	21.6742	7.95688	2.9922	1.75e-06	6.61e-06	0.58	4.7	-	-	-	-	-	-	-	-	-	-	-
c13526_g1	4195.45	2506.72	5884.18	2.34736	1.23104	1.09e-10	5.75e-10	68.32	160.64	-	-	2e-62 gnl|CDD|239648 cd03676, Nudix_hydrolase_3, Members of the Nudix hydrolase superfamily catalyze the hydrolysis of NUcleoside DIphosphates linked to other moieties, X. Enzymes belong to this superfamily requires a divalent cation, such as Mg2+ or Mn2+, for their activity and contain a highly conserved 23-residue nudix motif (GX5EX7REUXEEXGU, where U = I, L or V), which functions as a metal bi…	6e-48 gnl|CDD|232242 KOG4313, KOG4313, KOG4313, Thiamine pyrophosphokinase [Nucleotide transport and metabolism].	0.0 gb|EGY19011.1| isoamyl alcohol oxidase [Verticillium dahliae VdLs.17]	0.0 ref|XM_003002118.1| Verticillium albo-atrum VaMs.102 FAD binding domain-containing protein, mRNA	3e-06 gnl|CDD|215841 pfam00293, NUDIX, NUDIX domain.	4e-41 sp|P47173|YJ9J_YEAST Uncharacterized protein YJR142W OS=Saccharomyces cerevisiae (strain ATCC 204508 / S288c) GN=YJR142W PE=1 SV=1	0.0 tr|G2XGR3|G2XGR3_VERDV Isoamyl alcohol oxidase OS=Verticillium dahliae (strain VdLs.17 / ATCC MYA-4575 / FGSC 10137) GN=VDAG_09345 PE=4 SV=1	GO:0008762,UDP-N-acetylmuramate dehydrogenase activity;GO:0050660,flavin adenine dinucleotide binding;GO:0016787,hydrolase activity	-
c13544_g1	16344.9	8248.83	24441	2.96297	1.56704	0	0	438.01	1302.16	-	-	2e-103 gnl|CDD|185692 cd02183, GH16_fungal_CRH1_transglycosylase, glycosylphosphatidylinositol-glucanosyltransferase. Group of fungal GH16 members related to Saccharomyces cerevisiae Crh1p. Chr1p and Crh2p are transglycosylases that are required for the linkage of chitin to beta(1-3)glucose branches of beta(1-6)glucan, an important step in the assembly of new cell wall. Both have been shown to be…	-	0.0 gb|EGY20418.1| ice nucleation protein [Verticillium dahliae VdLs.17]	0.0 gb|AY524790.1| Verticillium dahliae allergen rAsp f9-like protein mRNA, complete cds	2e-51 gnl|CDD|216081 pfam00722, Glyco_hydro_16, Glycosyl hydrolases family 16.	3e-62 sp|Q8J0P4|CRF1_ASPFU Probable glycosidase crf1 OS=Neosartorya fumigata (strain ATCC MYA-4609 / Af293 / CBS 101355 / FGSC A1100) GN=crf1 PE=1 SV=2	0.0 tr|G2XIS4|G2XIS4_VERDV Ice nucleation protein OS=Verticillium dahliae (strain VdLs.17 / ATCC MYA-4575 / FGSC 10137) GN=VDAG_10047 PE=4 SV=1	GO:0031225,anchored to membrane;GO:0004553,hydrolase activity, hydrolyzing O-glycosyl compounds;GO:0005975,carbohydrate metabolic process;GO:0005576,extracellular region;GO:0005886,plasma membrane;GO:0005618,cell wall	-
c13546_g1	277.326	160.033	394.62	2.46587	1.3021	1.68e-12	1.08e-11	8.53	21.11	-	-	8e-113 gnl|CDD|233165 TIGR00879, SP, MFS transporter, sugar porter (SP) family. This model represent the sugar porter subfamily of the major facilitator superfamily (pfam00083) [Transport and binding proteins, Carbohydrates, organic alcohols, and acids].	9e-76 gnl|CDD|228203 KOG0254, KOG0254, KOG0254, Predicted transporter (major facilitator superfamily) [General function prediction only].	0.0 gb|EGY21363.1| general alpha-glucoside permease [Verticillium dahliae VdLs.17]	0.0 ref|XM_003008180.1| Verticillium albo-atrum VaMs.102 alpha-glucosides permease MPH2/3, mRNA	2e-89 gnl|CDD|215702 pfam00083, Sugar_tr, Sugar (and other) transporter.	2e-151 sp|A6ZX88|MPH3_YEAS7 Alpha-glucosides permease MPH3 OS=Saccharomyces cerevisiae (strain YJM789) GN=MPH3 PE=3 SV=1	0.0 tr|G2WXA8|G2WXA8_VERDV General alpha-glucoside permease OS=Verticillium dahliae (strain VdLs.17 / ATCC MYA-4575 / FGSC 10137) GN=VDAG_02887 PE=3 SV=1	GO:0000023,maltose metabolic process;GO:0022891,substrate-specific transmembrane transporter activity;GO:0008643,carbohydrate transport;GO:0016021,integral to membrane;GO:0005886,plasma membrane	K08141
c13566_g1	6401.88	10736.5	2067.27	0.192546	-2.37672	0	0	481.83	93.04	-	-	-	-	0.0 gb|EGY17876.1| hypothetical protein VDAG_01558 [Verticillium dahliae VdLs.17]	0.0 ref|XM_003001756.1| Verticillium albo-atrum VaMs.102 conserved hypothetical protein, mRNA	-	-	0.0 tr|G2WSF5|G2WSF5_VERDV Putative uncharacterized protein OS=Verticillium dahliae (strain VdLs.17 / ATCC MYA-4575 / FGSC 10137) GN=VDAG_01558 PE=4 SV=1	-	-
c13576_g1	178.973	245.837	112.108	0.456025	-1.13282	3.5e-17	2.99e-16	7.24	3.31	-	-	9e-35 gnl|CDD|239845 cd04380, RhoGAP_OCRL1, RhoGAP_OCRL1: RhoGAP (GTPase-activator protein [GAP] for Rho-like small GTPases) domain present in OCRL1-like proteins. OCRL1 (oculocerebrorenal syndrome of Lowe 1)-like proteins contain two conserved domains: a central inositol polyphosphate 5-phosphatase domain and a C-terminal Rho GAP domain, this GAP domain lacks the catalytic residue and therefore …	6e-29 gnl|CDD|228514 KOG0566, KOG0566, KOG0566, Inositol-1,4,5-triphosphate 5-phosphatase (synaptojanin), INP51/INP52/INP53 family [Intracellular trafficking, secretion, and vesicular transport].	0.0 gb|EGY23307.1| type II inositol-1,4,5-trisphosphate 5-phosphatase [Verticillium dahliae VdLs.17]	0.0 ref|XM_003000270.1| Verticillium albo-atrum VaMs.102 type II inositol-1,4,5-trisphosphate 5-phosphatase, mRNA	-	2e-20 sp|Q8K337|I5P2_MOUSE Type II inositol 1,4,5-trisphosphate 5-phosphatase OS=Mus musculus GN=Inpp5b PE=1 SV=1	0.0 tr|G2X408|G2X408_VERDV Type II inositol-1,4,5-trisphosphate 5-phosphatase OS=Verticillium dahliae (strain VdLs.17 / ATCC MYA-4575 / FGSC 10137) GN=VDAG_04745 PE=4 SV=1	GO:0046854,phosphatidylinositol phosphorylation;GO:0030317,sperm motility;GO:0007165,signal transduction;GO:0015630,microtubule cytoskeleton;GO:0030670,phagocytic vesicle membrane;GO:0031901,early endosome membrane;GO:0004439,phosphatidylinositol-4,5-bisphosphate 5-phosphatase activity;GO:0007283,spermatogenesis;GO:0005829,cytosol;GO:0016021,integral to membrane;GO:0004445,inositol-polyphosphate …	-
c13591_g1	73.5461	116.449	30.6429	0.263143	-1.92608	1.02e-17	8.86e-17	4.57	1.2	-	-	5e-36 gnl|CDD|235821 PRK06522, PRK06522, 2-dehydropantoate 2-reductase; Reviewed.	-	0.0 gb|EGY20742.1| hypothetical protein VDAG_10302 [Verticillium dahliae VdLs.17]	0.0 ref|XM_003003310.1| Verticillium albo-atrum VaMs.102 conserved hypothetical protein, mRNA	5e-28 gnl|CDD|219895 pfam08546, ApbA_C, Ketopantoate reductase PanE/ApbA C terminal. This is a family of 2-dehydropantoate 2-reductases also known as ketopantoate reductases, EC:1.1.1.169. The reaction catalyzed by this enzyme is: (R)-pantoate + NADP(+) <=> 2-dehydropantoate + NADPH. AbpA catalyzes the NADPH reduction of ketopantoic acid to pantoic acid in the alternative pyrimidine biosynthetic …	3e-22 sp|Q9HDU6|PANE_SCHPO Probable 2-dehydropantoate 2-reductase OS=Schizosaccharomyces pombe (strain 972 / ATCC 24843) GN=SPBPB2B2.09c PE=3 SV=1	0.0 tr|G2XJN9|G2XJN9_VERDV Putative uncharacterized protein OS=Verticillium dahliae (strain VdLs.17 / ATCC MYA-4575 / FGSC 10137) GN=VDAG_10302 PE=4 SV=1	GO:0006221,pyrimidine nucleotide biosynthetic process;GO:0008677,2-dehydropantoate 2-reductase activity;GO:0005829,cytosol;GO:0015940,pantothenate biosynthetic process;GO:0005634,nucleus;GO:0050661,NADP binding	K00077-ko00770,Pantothenate and CoA biosynthesis
c13594_g1	23.0447	10.2149	35.8746	3.512	1.81229	4.52e-06	1.64e-05	1.57	5.56	-	-	-	-	-	-	-	-	-	-	-
c13598_g1	248.183	343.9	152.467	0.443347	-1.17349	1.09e-24	1.22e-23	21.56	9.6	VDBG_00211	D-galacturonic acid reductase	7e-25 gnl|CDD|223745 COG0673, MviM, Predicted dehydrogenases and related proteins [General function prediction only].	7e-09 gnl|CDD|230680 KOG2741, KOG2741, KOG2741, Dimeric dihydrodiol dehydrogenase [Carbohydrate transport and metabolism, Secondary metabolites biosynthesis, transport and catabolism].	0.0 ref|XP_003008530.1| D-galacturonic acid reductase [Verticillium alfalfae VaMs.102] gb|EEY14104.1| D-galacturonic acid reductase [Verticillium alfalfae VaMs.102]	0.0 ref|XM_003008484.1| Verticillium albo-atrum VaMs.102 D-galacturonic acid reductase, mRNA	1e-10 gnl|CDD|201778 pfam01408, GFO_IDH_MocA, Oxidoreductase family, NAD-binding Rossmann fold. This family of enzymes utilise NADP or NAD. This family is called the GFO/IDH/MOCA family in swiss-prot.	3e-08 sp|P77376|YDGJ_ECOLI Uncharacterized oxidoreductase YdgJ OS=Escherichia coli (strain K12) GN=ydgJ PE=1 SV=2	0.0 tr|C9S956|C9S956_VERA1 D-galacturonic acid reductase OS=Verticillium albo-atrum (strain VaMs.102 / ATCC MYA-4576 / FGSC 10136) GN=VDBG_00211 PE=4 SV=1	GO:0055114,oxidation-reduction process;GO:0000166,nucleotide binding;GO:0016491,oxidoreductase activity	K18106-ko00040,Pentose and glucuronate interconversions
c13612_g1	2180.28	3453.98	906.58	0.262474	-1.92975	0	0	78.12	20.53	-	-	4e-43 gnl|CDD|99783 cd06186, NOX_Duox_like_FAD_NADP, NADPH oxidase (NOX) catalyzes the generation of reactive oxygen species (ROS) such as superoxide and hydrogen peroxide. ROS were originally identified as bactericidal agents in phagocytes, but are now also implicated in cell signaling and metabolism. NOX has a 6-alpha helix heme-binding transmembrane domain fused to a flavoprotein with the nucl…	5e-42 gnl|CDD|227990 KOG0039, KOG0039, KOG0039, Ferric reductase, NADH/NADPH oxidase and related proteins [Inorganic ion transport and metabolism, Secondary metabolites biosynthesis, transport and catabolism].	0.0 gb|EGY21136.1| ferric reductase [Verticillium dahliae VdLs.17]	0.0 ref|XM_003007959.1| Verticillium albo-atrum VaMs.102 ferric reductase, mRNA	4e-24 gnl|CDD|216705 pfam01794, Ferric_reduct, Ferric reductase like transmembrane component. This family includes a common region in the transmembrane proteins mammalian cytochrome B-245 heavy chain (gp91-phox), ferric reductase transmembrane component in yeast and respiratory burst oxidase from mouse-ear cress. This may be a family of flavocytochromes capable of moving electrons across the plas…	1e-50 sp|Q12333|FRE7_YEAST Ferric/cupric reductase transmembrane component 7 OS=Saccharomyces cerevisiae (strain ATCC 204508 / S288c) GN=FRE7 PE=1 SV=2	0.0 tr|G2WYH8|G2WYH8_VERDV Ferric reductase OS=Verticillium dahliae (strain VdLs.17 / ATCC MYA-4575 / FGSC 10137) GN=VDAG_02660 PE=4 SV=1	GO:0055072,iron ion homeostasis;GO:0006826,iron ion transport;GO:0000293,ferric-chelate reductase activity;GO:0015677,copper ion import;GO:0016021,integral to membrane;GO:0005886,plasma membrane;GO:0016491,oxidoreductase activity;GO:0022900,electron transport chain;GO:0046872,metal ion binding	-
c13631_g1	170.203	241.752	98.6551	0.408085	-1.29306	1.75e-20	1.7e-19	18.06	7.41	-	-	-	-	4e-117 gb|EGY21927.1| hypothetical protein VDAG_03367 [Verticillium dahliae VdLs.17]	0.0 ref|XM_003003726.1| Verticillium albo-atrum VaMs.102 conserved hypothetical protein, mRNA	-	-	5e-117 tr|G2WZC5|G2WZC5_VERDV Putative uncharacterized protein OS=Verticillium dahliae (strain VdLs.17 / ATCC MYA-4575 / FGSC 10137) GN=VDAG_03367 PE=4 SV=1	-	-
c1364_g1	3208.35	1874.08	4542.62	2.42391	1.27734	0	0	53.03	128.76	VDBG_02819	sphingolipid C4-hydroxylase SUR2	8e-34 gnl|CDD|225546 COG3000, ERG3, Sterol desaturase [Lipid metabolism].	7e-77 gnl|CDD|228820 KOG0874, KOG0874, KOG0874, Sphingolipid hydroxylase [Lipid transport and metabolism].	0.0 ref|XP_003006680.1| sphingolipid C4-hydroxylase SUR2 [Verticillium alfalfae VaMs.102] gb|EEY16710.1| sphingolipid C4-hydroxylase SUR2 [Verticillium alfalfae VaMs.102]	0.0 ref|XM_003006634.1| Verticillium albo-atrum VaMs.102 sphingolipid C4-hydroxylase SUR2, mRNA	2e-22 gnl|CDD|217907 pfam04116, FA_hydroxylase, Fatty acid hydroxylase superfamily. This superfamily includes fatty acid and carotene hydroxylases and sterol desaturases. Beta-carotene hydroxylase is involved in zeaxanthin synthesis by hydroxylating beta-carotene, but the enzyme may be involved in other pathways. This family includes C-5 sterol desaturase and C-4 sterol methyl oxidase. Members of…	9e-60 sp|P38992|SUR2_YEAST Sphingolipid C4-hydroxylase SUR2 OS=Saccharomyces cerevisiae (strain ATCC 204508 / S288c) GN=SUR2 PE=1 SV=1	0.0 tr|C9SC95|C9SC95_VERA1 Sphingolipid C4-hydroxylase SUR2 OS=Verticillium albo-atrum (strain VaMs.102 / ATCC MYA-4576 / FGSC 10136) GN=VDBG_02819 PE=4 SV=1	GO:0000170,sphingosine hydroxylase activity;GO:0030148,sphingolipid biosynthetic process;GO:0006665,sphingolipid metabolic process;GO:0005789,endoplasmic reticulum membrane;GO:0005506,iron ion binding;GO:0016021,integral to membrane;GO:0006633,fatty acid biosynthetic process;GO:0016491,oxidoreductase activity	K04713-ko00600,Sphingolipid metabolism
c13655_g1	15.5291	3.40495	27.6533	8.1215	3.02175	5.08e-08	2.13e-07	1.37	11.41	-	-	-	-	4e-96 gb|EGY15489.1| eukaryotic initiation factor 4F subunit p130 [Verticillium dahliae VdLs.17]	3e-107 ref|XM_003002394.1| Verticillium albo-atrum VaMs.102 eukaryotic initiation factor 4F subunit p130, mRNA	-	-	4e-96 tr|G2X921|G2X921_VERDV Eukaryotic initiation factor 4F subunit p130 OS=Verticillium dahliae (strain VdLs.17 / ATCC MYA-4575 / FGSC 10137) GN=VDAG_06653 PE=4 SV=1	GO:0003743,translation initiation factor activity;GO:0003677,DNA binding;GO:0016070,RNA metabolic process	-
c1366_g1	1019.38	399.741	1639.02	4.1002	2.03569	1.79e-11	1.02e-10	10.75	44.16	-	-	5e-53 gnl|CDD|215366 PLN02681, PLN02681, proline dehydrogenase.	4e-49 gnl|CDD|228135 KOG0186, KOG0186, KOG0186, Proline oxidase [Amino acid transport and metabolism].	0.0 gb|EGY20183.1| proline oxidase [Verticillium dahliae VdLs.17]	0.0 ref|XM_003007110.1| Verticillium albo-atrum VaMs.102 carbapenem antibiotics biosynthesis protein carD, mRNA	3e-29 gnl|CDD|216609 pfam01619, Pro_dh, Proline dehydrogenase.	7e-31 sp|O74524|PROD_SCHPO Probable proline dehydrogenase, mitochondrial OS=Schizosaccharomyces pombe (strain 972 / ATCC 24843) GN=SPCC70.03c PE=3 SV=1	0.0 tr|G2WV58|G2WV58_VERDV Proline oxidase OS=Verticillium dahliae (strain VdLs.17 / ATCC MYA-4575 / FGSC 10137) GN=VDAG_02199 PE=4 SV=1	GO:0004657,proline dehydrogenase activity;GO:0005759,mitochondrial matrix;GO:0006537,glutamate biosynthetic process;GO:0006562,proline catabolic process	-
c13667_g1	933.218	1408.29	458.148	0.325323	-1.62006	4.29e-155	1.28e-153	72.21	23.57	-	-	4e-48 gnl|CDD|233174 TIGR00893, 2A0114, D-galactonate transporter. [Transport and binding proteins, Carbohydrates, organic alcohols, and acids].	6e-99 gnl|CDD|230472 KOG2533, KOG2533, KOG2533, Permease of the major facilitator superfamily [Carbohydrate transport and metabolism].	0.0 gb|EGY17511.1| high-affinity nicotinic acid transporter [Verticillium dahliae VdLs.17]	0.0 ref|XM_003005967.1| Verticillium albo-atrum VaMs.102 high-affinity nicotinic acid transporter, mRNA	2e-30 gnl|CDD|219516 pfam07690, MFS_1, Major Facilitator Superfamily.	3e-78 sp|Q9US44|YIZG_SCHPO Uncharacterized transporter C1002.16c OS=Schizosaccharomyces pombe (strain 972 / ATCC 24843) GN=SPAC1002.16c PE=3 SV=1	0.0 tr|G2WTS0|G2WTS0_VERDV High-affinity nicotinic acid transporter OS=Verticillium dahliae (strain VdLs.17 / ATCC MYA-4575 / FGSC 10137) GN=VDAG_01193 PE=4 SV=1	GO:0005887,integral to plasma membrane;GO:0035353,nicotinamide mononucleotide transmembrane transport;GO:0032153,cell division site;GO:0016021,integral to membrane;GO:0055085,transmembrane transport;GO:0051286,cell tip;GO:0005794,Golgi apparatus;GO:0015663,nicotinamide mononucleotide transmembrane transporter activity	-
c13668_g1	308.775	450.134	167.415	0.371921	-1.42693	1.87e-42	3.07e-41	12.26	4.57	-	-	1e-15 gnl|CDD|238125 cd00204, ANK, ankyrin repeats; ankyrin repeats mediate protein-protein interactions in very diverse families of proteins. The number of ANK repeats in a protein can range from 2 to over 20 (ankyrins, for example). ANK repeats may occur in combinations with other types of domains. The structural repeat unit contains two antiparallel helices and a beta-hairpin, repeats are stac…	2e-10 gnl|CDD|232107 KOG4177, KOG4177, KOG4177, Ankyrin [Cell wall/membrane/envelope biogenesis].	0.0 gb|EGY15941.1| hypothetical protein VDAG_07105 [Verticillium dahliae VdLs.17]	0.0 ref|XM_003004297.1| Verticillium albo-atrum VaMs.102 conserved hypothetical protein, mRNA	1e-12 gnl|CDD|205076 pfam12796, Ank_2, Ankyrin repeats (3 copies).	7e-08 sp|Q9SM23|ACBP1_ARATH Acyl-CoA-binding domain-containing protein 1 OS=Arabidopsis thaliana GN=ACBP1 PE=1 SV=2	0.0 tr|G2X9R0|G2X9R0_VERDV Putative uncharacterized protein OS=Verticillium dahliae (strain VdLs.17 / ATCC MYA-4575 / FGSC 10137) GN=VDAG_07105 PE=4 SV=1	GO:0032791,lead ion binding;GO:0070300,phosphatidic acid binding;GO:0000062,fatty-acyl-CoA binding;GO:0005789,endoplasmic reticulum membrane;GO:0006629,lipid metabolic process;GO:0006869,lipid transport;GO:0016021,integral to membrane;GO:0005576,extracellular region;GO:0005886,plasma membrane;GO:0009409,response to cold;GO:0009505,plant-type cell wall;GO:0010288,response to lead ion	-
c13672_g1	1004.64	1391.94	617.342	0.44351	-1.17296	1.03e-94	2.52e-93	35.17	15.62	-	-	9e-55 gnl|CDD|213391 cd12148, fungal_TF_MHR, fungal transcription factor regulatory middle homology region. This domain is present in the large family of fungal zinc cluster transcription factors that contain an N-terminal GAL4-like C6 zinc binuclear cluster DNA-binding domain. Examples of members of this large fungal group are the following Saccharomyces cerevisiae transcription factors, GAL4, S…	-	0.0 gb|EGY14645.1| zinc finger transcription factor 1 [Verticillium dahliae VdLs.17]	0.0 ref|XM_003003138.1| Verticillium albo-atrum VaMs.102 zinc finger transcription factor 1, mRNA	6e-22 gnl|CDD|217880 pfam04082, Fungal_trans, Fungal specific transcription factor domain.	5e-68 sp|Q1MTM9|YFN1_SCHPO Uncharacterized transcriptional regulatory protein C1327.01c OS=Schizosaccharomyces pombe (strain 972 / ATCC 24843) GN=SPAC1327.01c PE=1 SV=2	0.0 tr|G2X6M7|G2X6M7_VERDV Zinc finger transcription factor 1 OS=Verticillium dahliae (strain VdLs.17 / ATCC MYA-4575 / FGSC 10137) GN=VDAG_05809 PE=4 SV=1	GO:0000981,sequence-specific DNA binding RNA polymerase II transcription factor activity;GO:0005737,cytoplasm;GO:0000978,RNA polymerase II core promoter proximal region sequence-specific DNA binding;GO:0003677,DNA binding;GO:0006357,regulation of transcription from RNA polymerase II promoter;GO:0008270,zinc ion binding;GO:0005634,nucleus;GO:0006366,transcription from RNA polymerase II promoter;GO…	-
c13690_g1	134.737	3.40495	266.07	78.142	6.28803	0	0	0.39	30.8	-	-	2e-23 gnl|CDD|163626 cd07383, MPP_Dcr2, Saccharomyces cerevisiae DCR2 phosphatase and related proteins, metallophosphatase domain. DCR2 phosphatase (Dosage-dependent Cell Cycle Regulator 2) functions together with DCR1 (Gid8) in a common pathway to accelerate initiation of DNA replication in Saccharomyces cerevisiae. Genetic analysis suggests that DCR1 functions upstream of DCR2. DCR2 interacts w…	5e-20 gnl|CDD|229373 KOG1432, KOG1432, KOG1432, Predicted DNA repair exonuclease SIA1 [General function prediction only].	0.0 gb|EGY22594.1| hypothetical protein VDAG_04032 [Verticillium dahliae VdLs.17]	0.0 ref|XM_003006941.1| Verticillium albo-atrum VaMs.102 conserved hypothetical protein, mRNA	-	5e-23 sp|Q9SR79|PPA16_ARATH Probable inactive purple acid phosphatase 16 OS=Arabidopsis thaliana GN=PAP16 PE=2 SV=1	0.0 tr|G2X1A3|G2X1A3_VERDV Putative uncharacterized protein OS=Verticillium dahliae (strain VdLs.17 / ATCC MYA-4575 / FGSC 10137) GN=VDAG_04032 PE=4 SV=1	GO:0016020,membrane;GO:0003993,acid phosphatase activity;GO:0005576,extracellular region;GO:0046872,metal ion binding	-
c13700_g1	203.803	273.077	134.53	0.492643	-1.02138	3.11e-16	2.53e-15	28.26	14.01	-	-	-	-	2e-32 gb|EGY18506.1| hypothetical protein VDAG_08840 [Verticillium dahliae VdLs.17]	-	-	-	2e-32 tr|G2XFA8|G2XFA8_VERDV Putative uncharacterized protein OS=Verticillium dahliae (strain VdLs.17 / ATCC MYA-4575 / FGSC 10137) GN=VDAG_08840 PE=4 SV=1	-	-
c13703_g1	427.779	599.952	255.606	0.426044	-1.23092	5.29e-45	9.09e-44	28.83	12.32	-	-	-	-	0.0 gb|EGY17696.1| hypothetical protein VDAG_01378 [Verticillium dahliae VdLs.17]	0.0 ref|XM_003006156.1| Verticillium albo-atrum VaMs.102 conserved hypothetical protein, mRNA	-	-	0.0 tr|G2WUA5|G2WUA5_VERDV Putative uncharacterized protein OS=Verticillium dahliae (strain VdLs.17 / ATCC MYA-4575 / FGSC 10137) GN=VDAG_01378 PE=4 SV=1	-	-
c13714_g1	4.42644	8.85287	0	0	#NAME?	0.000230604	0.000705628	3.17	0	-	-	1e-34 gnl|CDD|100109 cd05831, Ribosomal_P1, Ribosomal protein P1. This subfamily represents the eukaryotic large ribosomal protein P1. Eukaryotic P1 and P2 are functionally equivalent to the bacterial protein L7/L12, but are not homologous to L7/L12. P1 is located in the L12 stalk, with proteins P2, P0, L11, and 28S rRNA. P1 and P2 are the only proteins in the ribosome to occur as multimers, alwa…	1e-33 gnl|CDD|229701 KOG1762, KOG1762, KOG1762, 60s acidic ribosomal protein P1 [Translation, ribosomal structure and biogenesis].	9e-33 ref|XP_004666794.1| PREDICTED: 60S acidic ribosomal protein P1 isoform X1 [Jaculus jaculus]	7e-79 ref|XM_005291047.1| PREDICTED: Chrysemys picta bellii 60S acidic ribosomal protein P1-like (LOC101942900), mRNA	2e-11 gnl|CDD|215914 pfam00428, Ribosomal_60s, 60s Acidic ribosomal protein. This family includes archaebacterial L12, eukaryotic P0, P1 and P2.	5e-34 sp|P18660|RLA1_CHICK 60S acidic ribosomal protein P1 OS=Gallus gallus GN=RPLP1 PE=3 SV=1	3e-32 tr|G1M6P5|G1M6P5_AILME Uncharacterized protein OS=Ailuropoda melanoleuca GN=RPLP1 PE=3 SV=1	GO:0003735,structural constituent of ribosome;GO:0005840,ribosome;GO:0022625,cytosolic large ribosomal subunit;GO:0006414,translational elongation	K02942-ko03010,Ribosome
c13717_g1	4.48432	0	8.96864	Inf	Inf	0.000131493	0.000411807	0	1.9	-	-	-	-	-	-	-	-	-	-	-
c1372_g1	320.915	431.067	210.763	0.488934	-1.03229	3.83e-25	4.35e-24	19.1	9.36	-	-	3e-15 gnl|CDD|216454 pfam01363, FYVE, FYVE zinc finger. The FYVE zinc finger is named after four proteins that it has been found in: Fab1, YOTB/ZK632.12, Vac1, and EEA1. The FYVE finger has been shown to bind two Zn++ ions. The FYVE finger has eight potential zinc coordinating cysteine positions. Many members of this family also include two histidines in a motif R+HHC+XCG, where + represents a ch…	2e-39 gnl|CDD|229781 KOG1842, KOG1842, KOG1842, FYVE finger-containing protein [General function prediction only].	0.0 gb|EGY17056.1| VAC1 protein [Verticillium dahliae VdLs.17]	0.0 ref|XM_003001460.1| Verticillium albo-atrum VaMs.102 VAC1 protein, mRNA	6e-16 gnl|CDD|216454 pfam01363, FYVE, FYVE zinc finger. The FYVE zinc finger is named after four proteins that it has been found in: Fab1, YOTB/ZK632.12, Vac1, and EEA1. The FYVE finger has been shown to bind two Zn++ ions. The FYVE finger has eight potential zinc coordinating cysteine positions. Many members of this family also include two histidines in a motif R+HHC+XCG, where + represents a ch…	3e-60 sp|P32609|PEP7_YEAST Vacuolar segregation protein PEP7 OS=Saccharomyces cerevisiae (strain ATCC 204508 / S288c) GN=PEP7 PE=1 SV=2	0.0 tr|G2XDI8|G2XDI8_VERDV VAC1 protein OS=Verticillium dahliae (strain VdLs.17 / ATCC MYA-4575 / FGSC 10137) GN=VDAG_08220 PE=4 SV=1	GO:0010009,external side of endosome membrane;GO:0006896,Golgi to vacuole transport;GO:0006895,Golgi to endosome transport;GO:0006904,vesicle docking involved in exocytosis;GO:0000011,vacuole inheritance;GO:0008270,zinc ion binding;GO:0032266,phosphatidylinositol-3-phosphate binding;GO:0005774,vacuolar membrane;GO:0006906,vesicle fusion;GO:0046872,metal ion binding	K12481-ko04144,Endocytosis
c13724_g1	578.741	830.127	327.355	0.394344	-1.34247	3.33e-70	7.1e-69	30.6	12.09	-	-	-	-	0.0 gb|EGY22540.1| hypothetical protein VDAG_03978 [Verticillium dahliae VdLs.17]	-	-	-	0.0 tr|G2X149|G2X149_VERDV Putative uncharacterized protein OS=Verticillium dahliae (strain VdLs.17 / ATCC MYA-4575 / FGSC 10137) GN=VDAG_03978 PE=4 SV=1	-	-
c13757_g1	348.189	216.555	479.822	2.21571	1.14777	3.47e-12	2.17e-11	9.85	21.88	-	-	1e-174 gnl|CDD|223903 COG0833, LysP, Amino acid transporters [Amino acid transport and metabolism].	2e-132 gnl|CDD|229228 KOG1286, KOG1286, KOG1286, Amino acid transporters [Amino acid transport and metabolism].	0.0 gb|EGY15208.1| proline-specific permease [Verticillium dahliae VdLs.17]	0.0 ref|XM_003002740.1| Verticillium albo-atrum VaMs.102 dicarboxylic amino acid permease, mRNA	3e-108 gnl|CDD|215858 pfam00324, AA_permease, Amino acid permease.	2e-93 sp|P53388|DIP5_YEAST Dicarboxylic amino acid permease OS=Saccharomyces cerevisiae (strain ATCC 204508 / S288c) GN=DIP5 PE=1 SV=1	0.0 tr|G2X8C1|G2X8C1_VERDV Proline-specific permease OS=Verticillium dahliae (strain VdLs.17 / ATCC MYA-4575 / FGSC 10137) GN=VDAG_06062 PE=4 SV=1	GO:0016021,integral to membrane;GO:0005886,plasma membrane;GO:0015171,amino acid transmembrane transporter activity	K16261
c13758_g1	257.985	119.854	396.115	3.30497	1.72464	5.95e-13	3.99e-12	12.82	42.64	-	-	-	-	3e-31 gb|EGY15172.1| hypothetical protein VDAG_06026 [Verticillium dahliae VdLs.17]	2e-128 ref|XM_003002702.1| Verticillium albo-atrum VaMs.102 predicted protein, mRNA	-	-	4e-31 tr|G2X885|G2X885_VERDV Putative uncharacterized protein OS=Verticillium dahliae (strain VdLs.17 / ATCC MYA-4575 / FGSC 10137) GN=VDAG_06026 PE=4 SV=1	-	-
c13762_g1	1295.26	1739.25	851.274	0.489449	-1.03077	4.79e-96	1.18e-94	39.11	19.17	-	-	-	-	0.0 gb|EGY22155.1| hypothetical protein VDAG_03593 [Verticillium dahliae VdLs.17]	0.0 ref|XM_003006483.1| Verticillium albo-atrum VaMs.102 conserved hypothetical protein, mRNA	-	-	0.0 tr|G2X1I2|G2X1I2_VERDV Putative uncharacterized protein OS=Verticillium dahliae (strain VdLs.17 / ATCC MYA-4575 / FGSC 10137) GN=VDAG_03593 PE=4 SV=1	-	-
c13772_g1	81.1196	114.406	47.8328	0.418095	-1.2581	4.49e-10	2.18e-09	22.73	9.62	-	-	-	-	1e-50 gb|EGY13333.1| hypothetical protein VDAG_00015 [Verticillium dahliae VdLs.17]	2e-126 ref|XM_003008677.1| Verticillium albo-atrum VaMs.102 conserved hypothetical protein, mRNA	-	-	1e-50 tr|G2WR32|G2WR32_VERDV Putative uncharacterized protein OS=Verticillium dahliae (strain VdLs.17 / ATCC MYA-4575 / FGSC 10137) GN=VDAG_00015 PE=4 SV=1	-	-
c13779_g1	125.856	170.248	81.4652	0.47851	-1.06338	2.73e-11	1.52e-10	17.28	8.32	-	-	-	-	1e-136 gb|EGY15021.1| hypothetical protein VDAG_06511 [Verticillium dahliae VdLs.17]	-	-	-	1e-136 tr|G2X7Q3|G2X7Q3_VERDV Putative uncharacterized protein OS=Verticillium dahliae (strain VdLs.17 / ATCC MYA-4575 / FGSC 10137) GN=VDAG_06511 PE=4 SV=1	-	-
c13783_g1	768.101	410.637	1125.56	2.74102	1.45471	1.91e-11	1.08e-10	15.16	41.66	-	-	9e-72 gnl|CDD|239322 cd03024, DsbA_FrnE, DsbA family, FrnE subfamily; FrnE is a DsbA-like protein containing a CXXC motif. It is presumed to be a thiol oxidoreductase involved in polyketide biosynthesis, specifically in the production of the aromatic antibiotics frenolicin and nanaomycins.	-	0.0 gb|EGY17153.1| RING finger domain-containing protein [Verticillium dahliae VdLs.17]	0.0 ref|XM_003005606.1| Verticillium albo-atrum VaMs.102 RING finger domain-containing protein, mRNA	4e-40 gnl|CDD|216433 pfam01323, DSBA, DSBA-like thioredoxin domain. This family contains a diverse set of proteins with a thioredoxin-like structure pfam00085. This family also includes 2-hydroxychromene-2-carboxylate (HCCA) isomerase enzymes catalyze one step in prokaryotic polyaromatic hydrocarbon (PAH) catabolic pathways. This family also contains members with functions other than HCCA isomeri…	5e-11 sp|P39598|YWBO_BACSU Uncharacterized protein YwbO OS=Bacillus subtilis (strain 168) GN=ywbO PE=4 SV=1	0.0 tr|G2WSQ4|G2WSQ4_VERDV RING finger domain-containing protein OS=Verticillium dahliae (strain VdLs.17 / ATCC MYA-4575 / FGSC 10137) GN=VDAG_00835 PE=4 SV=1	GO:0015035,protein disulfide oxidoreductase activity;GO:0008270,zinc ion binding;GO:0046872,metal ion binding	-
c13788_g1	17.5721	7.49089	27.6533	3.69159	1.88424	3.72e-05	0.000124051	0.77	2.86	-	-	-	-	1e-13 gb|EGY22773.1| hypothetical protein VDAG_04211 [Verticillium dahliae VdLs.17]	6e-53 ref|XM_003005018.1| Verticillium albo-atrum VaMs.102 hypothetical protein, mRNA	-	-	1e-13 tr|G2X317|G2X317_VERDV Putative uncharacterized protein OS=Verticillium dahliae (strain VdLs.17 / ATCC MYA-4575 / FGSC 10137) GN=VDAG_04211 PE=4 SV=1	-	-
c13802_g1	10.2974	3.40495	17.1899	5.0485	2.33586	0.000214449	0.000659323	0.31	1.55	-	-	-	-	-	-	-	-	-	-	-
c1383_g1	148.993	201.573	96.4129	0.478302	-1.064	4.07e-13	2.77e-12	15.76	8	-	-	6e-75 gnl|CDD|173849 cd01160, LCAD, Long chain acyl-CoA dehydrogenase. LCAD is an acyl-CoA dehydrogenases (ACAD), which is found in the mitochondria of eukaryotes and in some prokaryotes. It catalyzes the alpha, beta dehydrogenation of the corresponding trans-enoyl-CoA by FAD, which becomes reduced. The reduced form of LCAD is reoxidized in the oxidative half-reaction by electron-transferring fla…	8e-44 gnl|CDD|228089 KOG0139, KOG0139, KOG0139, Short-chain acyl-CoA dehydrogenase [Lipid transport and metabolism].	0.0 gb|EGY22530.1| long-chain specific acyl-CoA dehydrogenase [Verticillium dahliae VdLs.17]	0.0 ref|XM_003006874.1| Verticillium albo-atrum VaMs.102 acyl CoA dehydrogenase, mRNA	1e-32 gnl|CDD|201229 pfam00441, Acyl-CoA_dh_1, Acyl-CoA dehydrogenase, C-terminal domain. C-terminal domain of Acyl-CoA dehydrogenase is an all-alpha, four helical up-and-down bundle.	8e-32 sp|C3UVB0|ACD_DESML Glutaryl-CoA dehydrogenase OS=Desulfococcus multivorans GN=Acd PE=1 SV=1	0.0 tr|G2X139|G2X139_VERDV Long-chain specific acyl-CoA dehydrogenase OS=Verticillium dahliae (strain VdLs.17 / ATCC MYA-4575 / FGSC 10137) GN=VDAG_03968 PE=3 SV=1	GO:0050660,flavin adenine dinucleotide binding;GO:0003995,acyl-CoA dehydrogenase activity;GO:0019439,aromatic compound catabolic process	K15389
c13830_g1	244.565	418.128	71.0017	0.169809	-2.55802	6.55e-84	1.52e-82	45.14	7.72	-	-	-	-	6e-15 gb|EGY15096.1| hypothetical protein VDAG_06586 [Verticillium dahliae VdLs.17]	-	-	-	8e-15 tr|G2X7X8|G2X7X8_VERDV Putative uncharacterized protein OS=Verticillium dahliae (strain VdLs.17 / ATCC MYA-4575 / FGSC 10137) GN=VDAG_06586 PE=4 SV=1	-	-
c13837_g1	1137.56	1616.67	658.448	0.407286	-1.29588	6.3e-128	1.74e-126	201.01	82.52	-	-	5e-10 gnl|CDD|218720 pfam05730, CFEM, CFEM domain. This fungal specific cysteine rich domain is found in some proteins with proposed roles in fungal pathogenesis.	-	6e-23 gb|EGY19889.1| hypothetical protein VDAG_01905 [Verticillium dahliae VdLs.17]	3e-135 ref|XM_003007413.1| Verticillium albo-atrum VaMs.102 predicted protein, mRNA	1e-10 gnl|CDD|218720 pfam05730, CFEM, CFEM domain. This fungal specific cysteine rich domain is found in some proteins with proposed roles in fungal pathogenesis.	-	7e-23 tr|G2WWB9|G2WWB9_VERDV Putative uncharacterized protein OS=Verticillium dahliae (strain VdLs.17 / ATCC MYA-4575 / FGSC 10137) GN=VDAG_01905 PE=4 SV=1	-	-
c1385_g1	332.63	635.364	29.8955	0.0470525	-4.40958	1e-204	3.17e-203	23.79	1.13	-	-	1e-13 gnl|CDD|214614 smart00317, SET, SET (Su(var)3-9, Enhancer-of-zeste, Trithorax) domain. Putative methyl transferase, based on outlier plant homologues.	1e-12 gnl|CDD|232371 KOG4442, KOG4442, KOG4442, Clathrin coat binding protein/Huntingtin interacting protein HIP1, involved in regulation of endocytosis [Intracellular trafficking, secretion, and vesicular transport].	0.0 gb|EGY21913.1| SET domain-containing protein [Verticillium dahliae VdLs.17]	0.0 ref|XM_003003716.1| Verticillium albo-atrum VaMs.102 SET domain-containing protein, mRNA	3e-13 gnl|CDD|216155 pfam00856, SET, SET domain. SET domains are protein lysine methyltransferase enzymes. SET domains appear to be protein-protein interaction domains. It has been demonstrated that SET domains mediate interactions with a family of proteins that display similarity with dual-specificity phosphatases (dsPTPases). A subset of SET domains have been called PR domains. These domains ar…	0.0 sp|P0CY36|Y1806_PHANO SET domain-containing protein SNOG_11806 OS=Phaeosphaeria nodorum (strain SN15 / ATCC MYA-4574 / FGSC 10173) GN=SNOG_11806 PE=3 SV=1	0.0 tr|G2WZB1|G2WZB1_VERDV SET domain-containing protein OS=Verticillium dahliae (strain VdLs.17 / ATCC MYA-4575 / FGSC 10137) GN=VDAG_03353 PE=4 SV=1	-	K14778
c13858_g1	104.148	140.284	68.0122	0.484818	-1.04448	2.59e-09	1.19e-08	17.46	8.53	-	-	-	-	3e-10 gb|EGY13983.1| hypothetical protein VDAG_00665 [Verticillium dahliae VdLs.17]	-	-	-	3e-10 tr|G2WQM3|G2WQM3_VERDV Putative uncharacterized protein OS=Verticillium dahliae (strain VdLs.17 / ATCC MYA-4575 / FGSC 10137) GN=VDAG_00665 PE=4 SV=1	-	-
c13862_g1	12.0995	4.76693	19.4321	4.07643	2.02731	0.000304303	0.000920496	0.36	1.48	-	-	1e-16 gnl|CDD|223354 COG0277, GlcD, FAD/FMN-containing dehydrogenases [Energy production and conversion].	-	0.0 gb|EGY22449.1| hypothetical protein VDAG_03887 [Verticillium dahliae VdLs.17]	-	7e-10 gnl|CDD|216574 pfam01565, FAD_binding_4, FAD binding domain. This family consists of various enzymes that use FAD as a co-factor, most of the enzymes are similar to oxygen oxidoreductase. One of the enzymes Vanillyl-alcohol oxidase (VAO) has a solved structure, the alignment includes the FAD binding site, called the PP-loop, between residues 99-110. The FAD molecule is covalently bound in t…	-	0.0 tr|G2X0V8|G2X0V8_VERDV Putative uncharacterized protein OS=Verticillium dahliae (strain VdLs.17 / ATCC MYA-4575 / FGSC 10137) GN=VDAG_03887 PE=4 SV=1	GO:0008762,UDP-N-acetylmuramate dehydrogenase activity;GO:0050660,flavin adenine dinucleotide binding	-
c1389_g1	32.496	46.3073	18.6847	0.403493	-1.30939	4.67e-05	0.000154256	11.26	4.75	-	-	-	-	-	-	-	-	-	-	-
c13894_g1	10.0897	0	20.1794	Inf	Inf	1.97e-09	9.14e-09	0	2.32	-	-	-	-	-	-	-	-	-	-	-
c13930_g1	29.1898	6.8099	51.5697	7.57275	2.92082	1.73e-13	1.2e-12	0.47	3.59	-	-	-	-	-	-	-	-	-	-	-
c13934_g1	383.981	532.534	235.427	0.442088	-1.1776	1.53e-37	2.31e-36	28.31	12.56	-	-	2e-60 gnl|CDD|215702 pfam00083, Sugar_tr, Sugar (and other) transporter.	2e-59 gnl|CDD|228203 KOG0254, KOG0254, KOG0254, Predicted transporter (major facilitator superfamily) [General function prediction only].	0.0 gb|EGY18948.1| proton myo-inositol cotransporter [Verticillium dahliae VdLs.17]	0.0 ref|XM_003002056.1| Verticillium albo-atrum VaMs.102 proton myo-inositol cotransporter, mRNA	3e-61 gnl|CDD|215702 pfam00083, Sugar_tr, Sugar (and other) transporter.	2e-38 sp|B5VF36|MPH3_YEAS6 Alpha-glucosides permease MPH3 OS=Saccharomyces cerevisiae (strain AWRI1631) GN=MPH3 PE=3 SV=1	0.0 tr|G2XGK0|G2XGK0_VERDV Proton myo-inositol cotransporter OS=Verticillium dahliae (strain VdLs.17 / ATCC MYA-4575 / FGSC 10137) GN=VDAG_09282 PE=4 SV=1	GO:0000023,maltose metabolic process;GO:0022891,substrate-specific transmembrane transporter activity;GO:0008643,carbohydrate transport;GO:0016021,integral to membrane;GO:0005886,plasma membrane;GO:0022857,transmembrane transporter activity	-
c13971_g1	312.735	437.877	187.594	0.428418	-1.22291	5.65e-33	7.78e-32	37.32	16.08	-	-	6e-164 gnl|CDD|235228 PRK04155, PRK04155, chaperone protein HchA; Provisional.	-	0.0 gb|EGY18798.1| chaperone protein hchA [Verticillium dahliae VdLs.17]	0.0 ref|XM_003003994.1| Verticillium albo-atrum VaMs.102 chaperone protein hchA, mRNA	9e-07 gnl|CDD|216814 pfam01965, DJ-1_PfpI, DJ-1/PfpI family. The family includes the protease PfpI. This domain is also found in transcriptional regulators. This N-terminal region of the full-length AdpA proteins is necessary for dimerisation of the molecule.	6e-114 sp|Q02IV5|HCHA_PSEAB Molecular chaperone Hsp31 and glyoxalase 3 OS=Pseudomonas aeruginosa (strain UCBPP-PA14) GN=hchA PE=3 SV=1	0.0 tr|G2XFX9|G2XFX9_VERDV Chaperone protein hchA OS=Verticillium dahliae (strain VdLs.17 / ATCC MYA-4575 / FGSC 10137) GN=VDAG_08958 PE=4 SV=1	GO:0005737,cytoplasm;GO:0016829,lyase activity	-
c13986_g1	21.1354	34.0495	8.22126	0.24145	-2.0502	1.71e-06	6.45e-06	1.82	0.44	-	-	1e-57 gnl|CDD|225487 COG2936, COG2936, Predicted acyl esterases [General function prediction only].	-	0.0 gb|EGY19348.1| X-Pro dipeptidyl-peptidase protein [Verticillium dahliae VdLs.17]	0.0 ref|XM_003006428.1| Verticillium albo-atrum VaMs.102 X-Pro dipeptidyl-peptidase protein, mRNA	6e-38 gnl|CDD|216890 pfam02129, Peptidase_S15, X-Pro dipeptidyl-peptidase (S15 family).	7e-14 sp|Q9L9D7|COCE_RHOSM Cocaine esterase OS=Rhodococcus sp. (strain MB1 Bresler) GN=cocE PE=1 SV=1	0.0 tr|G2XHQ4|G2XHQ4_VERDV X-Pro dipeptidyl-peptidase protein OS=Verticillium dahliae (strain VdLs.17 / ATCC MYA-4575 / FGSC 10137) GN=VDAG_09808 PE=4 SV=1	GO:0005737,cytoplasm;GO:0008239,dipeptidyl-peptidase activity;GO:0006508,proteolysis;GO:0050784,cocaine catabolic process;GO:0004091,carboxylesterase activity;GO:0004177,aminopeptidase activity	-
c13993_g1	195.143	305.084	85.2021	0.279275	-1.84024	1.89e-41	3.05e-40	10.37	2.9	-	-	0.0 gnl|CDD|132868 cd07230, Pat_TGL4-5_like, Triacylglycerol lipase 4 and 5. TGL4 and TGL5 are triacylglycerol lipases that are involved in triacylglycerol mobilization and degradation; they are found in lipid particles. Tgl4 is a functional ortholog of mammalian adipose TG lipase (ATGL) and is phosphorylated and activated by cyclin-dependent kinase 1 (Cdk1/Cdc28). TGL4 is 30% homologus to TGL3, …	2e-144 gnl|CDD|230153 KOG2214, KOG2214, KOG2214, Predicted esterase of the alpha-beta hydrolase superfamily [General function prediction only].	0.0 gb|EGY15596.1| lipase [Verticillium dahliae VdLs.17]	0.0 ref|XM_003002499.1| Verticillium albo-atrum VaMs.102 lipase, mRNA	6e-36 gnl|CDD|221241 pfam11815, DUF3336, Domain of unknown function (DUF3336). This family of proteins are functionally uncharacterized. This family is found in bacteria and eukaryotes. This presumed domain is typically between 143 to 227 amino acids in length.	2e-125 sp|P36165|TGL4_YEAST Lipase 4 OS=Saccharomyces cerevisiae (strain ATCC 204508 / S288c) GN=TGL4 PE=1 SV=1	0.0 tr|G2X9C8|G2X9C8_VERDV Lipase OS=Verticillium dahliae (strain VdLs.17 / ATCC MYA-4575 / FGSC 10137) GN=VDAG_06760 PE=4 SV=1	GO:0007114,cell budding;GO:0004771,sterol esterase activity;GO:0016787,hydrolase activity;GO:0004806,triglyceride lipase activity;GO:0050253,retinyl-palmitate esterase activity;GO:0047499,calcium-independent phospholipase A2 activity;GO:0042171,lysophosphatidic acid acyltransferase activity;GO:0005811,lipid particle;GO:0006629,lipid metabolic process;GO:0019433,triglyceride catabolic process;GO:0…	K14674-ko00100,Steroid biosynthesis;ko00561,Glycerolipid metabolism;ko00564,Glycerophospholipid metabolism;ko00565,Ether lipid metabolism;ko00590,Arachidonic acid metabolism;ko00591,Linoleic acid metabolism;ko00592,alpha-Linolenic acid metabolism
c140_g1	59.9348	96.7006	23.169	0.239595	-2.06133	3.35e-16	2.72e-15	6.6	1.59	-	-	0.0 gnl|CDD|239439 cd03323, D-glucarate_dehydratase, D-Glucarate dehydratase (GlucD) catalyzes the dehydration of both D-glucarate and L-idarate to form 5-keto-4-deoxy-D-glucarate (5-KDG) , the initial reaction of the catabolic pathway for (D)-glucarate. GlucD belongs to the enolase superfamily of enzymes, characterized by the presence of an enolate anion intermediate which is generated by abstra…	-	0.0 gb|EGY19684.1| glucarate dehydratase [Verticillium dahliae VdLs.17]	0.0 ref|XM_003007621.1| Verticillium albo-atrum VaMs.102 glucarate dehydratase, mRNA	4e-23 gnl|CDD|222086 pfam13378, MR_MLE_C, Enolase C-terminal domain-like. This domain appears at the C-terminus of many of the proteins that carry the MR_MLE, pfam01188 and MR_MLE_N pfam02746 domains. EC:4.2.1.40.	5e-131 sp|Q9RDE9|GUDD_STRCO Probable glucarate dehydratase OS=Streptomyces coelicolor (strain ATCC BAA-471 / A3(2) / M145) GN=gudD PE=3 SV=1	0.0 tr|G2WVR4|G2WVR4_VERDV Glucarate dehydratase OS=Verticillium dahliae (strain VdLs.17 / ATCC MYA-4575 / FGSC 10137) GN=VDAG_01700 PE=4 SV=1	GO:0003824,catalytic activity;GO:0042838,D-glucarate catabolic process;GO:0008872,glucarate dehydratase activity;GO:0046872,metal ion binding	K01706-ko00053,Ascorbate and aldarate metabolism
c14013_g1	19.5078	36.7735	2.24216	0.0609722	-4.0357	2.4e-12	1.51e-11	2.74	0.17	-	-	6e-09 gnl|CDD|216155 pfam00856, SET, SET domain. SET domains are protein lysine methyltransferase enzymes. SET domains appear to be protein-protein interaction domains. It has been demonstrated that SET domains mediate interactions with a family of proteins that display similarity with dual-specificity phosphatases (dsPTPases). A subset of SET domains have been called PR domains. These domains ar…	-	0.0 gb|EGY22165.1| TPR domain-containing protein [Verticillium dahliae VdLs.17]	0.0 ref|XM_003006493.1| Verticillium albo-atrum VaMs.102 TPR domain-containing protein, mRNA	1e-09 gnl|CDD|216155 pfam00856, SET, SET domain. SET domains are protein lysine methyltransferase enzymes. SET domains appear to be protein-protein interaction domains. It has been demonstrated that SET domains mediate interactions with a family of proteins that display similarity with dual-specificity phosphatases (dsPTPases). A subset of SET domains have been called PR domains. These domains ar…	5e-08 sp|A5DQN2|SET5_PICGU Potential protein lysine methyltransferase SET5 OS=Meyerozyma guilliermondii (strain ATCC 6260 / CBS 566 / DSM 6381 / JCM 1539 / NBRC 10279 / NRRL Y-324) GN=SET5 PE=3 SV=2	0.0 tr|G2X1J2|G2X1J2_VERDV TPR domain-containing protein OS=Verticillium dahliae (strain VdLs.17 / ATCC MYA-4575 / FGSC 10137) GN=VDAG_03603 PE=4 SV=1	GO:0008168,methyltransferase activity;GO:0005737,cytoplasm;GO:0005634,nucleus	-
c14014_g1	55.299	23.1537	87.4443	3.77669	1.91712	1.19e-13	8.29e-13	3.4	12.97	-	-	-	-	-	-	-	-	-	-	-
c14062_g1	32.038	2.04297	62.0331	30.3642	4.9243	6.66e-16	5.31e-15	0.78	24.22	-	-	-	-	5e-50 gb|EGY14477.1| hypothetical protein VDAG_05641 [Verticillium dahliae VdLs.17]	3e-152 ref|XM_003002198.1| Verticillium albo-atrum VaMs.102 predicted protein, mRNA	-	-	6e-50 tr|G2X659|G2X659_VERDV Putative uncharacterized protein OS=Verticillium dahliae (strain VdLs.17 / ATCC MYA-4575 / FGSC 10137) GN=VDAG_05641 PE=4 SV=1	-	-
c14068_g1	133.605	202.935	64.2753	0.316728	-1.65868	1.54e-24	1.72e-23	45.17	14.51	-	-	-	-	2e-17 gb|EGY19534.1| hypothetical protein VDAG_09868 [Verticillium dahliae VdLs.17]	-	-	-	2e-17 tr|G2XI86|G2XI86_VERDV Putative uncharacterized protein OS=Verticillium dahliae (strain VdLs.17 / ATCC MYA-4575 / FGSC 10137) GN=VDAG_09868 PE=4 SV=1	-	-
c1408_g1	122.9	169.567	76.2335	0.449578	-1.15336	1.28e-12	8.32e-12	13.63	6.01	-	-	-	-	4e-163 gb|EGY17808.1| hypothetical protein VDAG_01490 [Verticillium dahliae VdLs.17]	0.0 ref|XM_003006262.1| Verticillium albo-atrum VaMs.102 conserved hypothetical protein, mRNA	-	-	5e-163 tr|G2WUL7|G2WUL7_VERDV Putative uncharacterized protein OS=Verticillium dahliae (strain VdLs.17 / ATCC MYA-4575 / FGSC 10137) GN=VDAG_01490 PE=4 SV=1	-	-
c141_g1	183.543	52.4362	314.65	6.00062	2.58511	0	0	2.48	14.89	-	-	-	-	0.0 gb|EGY17996.1| hypothetical protein VDAG_08330 [Verticillium dahliae VdLs.17]	0.0 ref|XM_003008315.1| Verticillium albo-atrum VaMs.102 conserved hypothetical protein, mRNA	-	-	0.0 tr|G2XDU8|G2XDU8_VERDV Putative uncharacterized protein OS=Verticillium dahliae (strain VdLs.17 / ATCC MYA-4575 / FGSC 10137) GN=VDAG_08330 PE=4 SV=1	-	-
c1410_g1	409.01	555.688	262.333	0.472086	-1.08288	2.14e-34	3.03e-33	24	11.36	VDBG_03969	F-box domain-containing protein	2e-38 gnl|CDD|192915 pfam12014, DUF3506, Domain of unknown function (DUF3506). This presumed domain is functionally uncharacterized. This domain is found in eukaryotes. This domain is typically between 131 to 148 amino acids in length. This domain has a conserved KLTGD sequence motif.	-	0.0 ref|XP_003006016.1| F-box domain-containing protein [Verticillium alfalfae VaMs.102] gb|EEY17860.1| F-box domain-containing protein [Verticillium alfalfae VaMs.102]	0.0 ref|XM_003005970.1| Verticillium albo-atrum VaMs.102 F-box domain-containing protein, mRNA	5e-39 gnl|CDD|192915 pfam12014, DUF3506, Domain of unknown function (DUF3506). This presumed domain is functionally uncharacterized. This domain is found in eukaryotes. This domain is typically between 131 to 148 amino acids in length. This domain has a conserved KLTGD sequence motif.	-	0.0 tr|C9SF74|C9SF74_VERA1 F-box domain-containing protein OS=Verticillium albo-atrum (strain VaMs.102 / ATCC MYA-4576 / FGSC 10136) GN=VDBG_03969 PE=4 SV=1	-	-
c14125_g1	13.3789	24.5156	2.24216	0.0914583	-3.45074	9.14e-08	3.76e-07	4.22	0.39	ATP6	ATP synthase F0 subunit 6	3e-114 gnl|CDD|177144 MTH00073, ATP6, ATP synthase F0 subunit 6; Provisional.	3e-35 gnl|CDD|232592 KOG4665, KOG4665, KOG4665, ATP synthase F0 subunit 6 and related proteins [Energy production and conversion].	7e-94 ref|NP_861581.1| ATP synthase F0 subunit 6 [Andrias davidianus] emb|CAD37339.1| ATPase subunit 6 [Andrias davidianus]	0.0 emb|AJ492192.1| Andrias davidianus complete mitochondrial genome	8e-41 gnl|CDD|109186 pfam00119, ATP-synt_A, ATP synthase A chain.	1e-69 sp|Q9MIY5|ATP6_DANRE ATP synthase subunit a OS=Danio rerio GN=mt-atp6 PE=3 SV=1	8e-94 tr|Q7Y8V3|Q7Y8V3_ANDDA ATP synthase subunit a OS=Andrias davidianus GN=ATPase 6 PE=3 SV=1	GO:0015078,hydrogen ion transmembrane transporter activity;GO:0005743,mitochondrial inner membrane;GO:0016021,integral to membrane;GO:0015986,ATP synthesis coupled proton transport;GO:0045263,proton-transporting ATP synthase complex, coupling factor F(o)	-
c14149_g1	135.441	234.261	36.622	0.15633	-2.67733	4.03e-50	7.31e-49	39.35	6.22	-	-	-	-	3e-66 gb|EGY15109.1| hypothetical protein VDAG_05963 [Verticillium dahliae VdLs.17]	-	-	-	4e-66 tr|G2X822|G2X822_VERDV Putative uncharacterized protein OS=Verticillium dahliae (strain VdLs.17 / ATCC MYA-4575 / FGSC 10137) GN=VDAG_05963 PE=4 SV=1	-	-
c14159_g1	19.5734	4.76693	34.3798	7.21214	2.85043	3.32e-09	1.52e-08	0.31	2.26	-	-	-	-	-	-	-	-	-	-	-
c14170_g1	69.7342	110.32	29.1481	0.264213	-1.92023	8.45e-17	7.08e-16	39.69	10.72	-	-	-	-	-	-	-	-	-	-	-
c14190_g1	16.5506	5.44792	27.6533	5.07594	2.34367	2.13e-06	7.99e-06	0.62	3.16	-	-	-	-	-	-	-	-	-	-	-
c14199_g1	68.3808	115.087	21.6742	0.188328	-2.40868	1.07e-22	1.12e-21	35.13	6.74	-	-	-	-	6e-34 gb|EGY15109.1| hypothetical protein VDAG_05963 [Verticillium dahliae VdLs.17]	-	-	-	7e-34 tr|G2X822|G2X822_VERDV Putative uncharacterized protein OS=Verticillium dahliae (strain VdLs.17 / ATCC MYA-4575 / FGSC 10137) GN=VDAG_05963 PE=4 SV=1	-	-
c142_g1	52.203	78.9949	25.4112	0.321681	-1.6363	3.02e-10	1.5e-09	7.6	2.46	-	-	1e-80 gnl|CDD|216303 pfam01112, Asparaginase_2, Asparaginase.	9e-128 gnl|CDD|229534 KOG1593, KOG1593, KOG1593, Asparaginase [Amino acid transport and metabolism].	2e-142 emb|CCF34892.1| asparaginase [Colletotrichum higginsianum]	5e-99 ref|XM_003001197.1| Verticillium albo-atrum VaMs.102 asparaginase, mRNA	2e-81 gnl|CDD|216303 pfam01112, Asparaginase_2, Asparaginase.	4e-89 sp|Q56W64|ASPG3_ARATH Probable isoaspartyl peptidase/L-asparaginase 3 OS=Arabidopsis thaliana GN=At5g61540 PE=2 SV=1	2e-142 tr|H1V3U0|H1V3U0_COLHI Asparaginase OS=Colletotrichum higginsianum (strain IMI 349063) GN=CH063_06798 PE=4 SV=1	GO:0016787,hydrolase activity;GO:0008798,beta-aspartyl-peptidase activity;GO:0006508,proteolysis;GO:0033345,asparagine catabolic process via L-aspartate;GO:0003948,N4-(beta-N-acetylglucosaminyl)-L-asparaginase activity;GO:0051604,protein maturation	K01444-ko00511,Other glycan degradation;ko04142,Lysosome
c1421_g2	63.2563	89.8907	36.622	0.407405	-1.29546	1.61e-08	7.02e-08	4.13	1.69	-	-	4e-130 gnl|CDD|223327 COG0249, MutS, Mismatch repair ATPase (MutS family) [DNA replication, recombination, and repair].	0.0 gnl|CDD|228167 KOG0218, KOG0218, KOG0218, Mismatch repair MSH3 [Replication, recombination and repair].	0.0 gb|EGY22791.1| DNA mismatch repair protein Msh3 [Verticillium dahliae VdLs.17]	0.0 ref|XM_003005036.1| Verticillium albo-atrum VaMs.102 DNA mismatch repair protein Msh3, mRNA	5e-41 gnl|CDD|218489 pfam05192, MutS_III, MutS domain III. This domain is found in proteins of the MutS family (DNA mismatch repair proteins) and is found associated with pfam00488, pfam05188, pfam01624 and pfam05190. The MutS family of proteins is named after the Salmonella typhimurium MutS protein involved in mismatch repair; other members of the family included the eukaryotic MSH 1,2,3, 4,5 an…	0.0 sp|Q7SD11|MSH3_NEUCR DNA mismatch repair protein msh-3 OS=Neurospora crassa (strain ATCC 24698 / 74-OR23-1A / CBS 708.71 / DSM 1257 / FGSC 987) GN=msh-3 PE=3 SV=1	0.0 tr|G2X1Q5|G2X1Q5_VERDV DNA mismatch repair protein Msh3 OS=Verticillium dahliae (strain VdLs.17 / ATCC MYA-4575 / FGSC 10137) GN=VDAG_04229 PE=3 SV=1	GO:0000710,meiotic mismatch repair;GO:0007131,reciprocal meiotic recombination;GO:0000735,removal of nonhomologous ends;GO:0003684,damaged DNA binding;GO:0008094,DNA-dependent ATPase activity;GO:0005524,ATP binding;GO:0000404,loop DNA binding;GO:0000406,double-strand/single-strand DNA junction binding;GO:0032302,MutSbeta complex;GO:0006298,mismatch repair;GO:0030983,mismatched DNA binding;GO:0000…	K08736-ko03430,Mismatch repair;ko05200,Pathways in cancer;ko05210,Colorectal cancer
c14213_g1	18.3195	7.49089	29.1481	3.89114	1.96019	1.36e-05	4.75e-05	2.43	9.66	-	-	-	-	-	-	-	-	-	-	-
c14216_g1	25.2537	10.8958	39.6115	3.63547	1.86214	8.96e-07	3.45e-06	1.05	3.84	-	-	-	-	0.0 gb|EGY16987.1| hypothetical protein VDAG_08151 [Verticillium dahliae VdLs.17]	-	-	-	0.0 tr|G2XDB9|G2XDB9_VERDV Putative uncharacterized protein OS=Verticillium dahliae (strain VdLs.17 / ATCC MYA-4575 / FGSC 10137) GN=VDAG_08151 PE=4 SV=1	-	-
c1425_g1	593.412	1035.11	151.72	0.146574	-2.7703	1.08e-223	3.48e-222	73.21	10.84	-	-	2e-25 gnl|CDD|222455 pfam13924, Lipocalin_5, Lipocalin-like domain. This family includes domains distantly related to lipocalins. However, they do contain the important GXW motif in the first strand. The protein in this family include aln5, which is involved in biosynthesis of alnumycin. The family also includes the ZFK protein from Trypanosoma brucei which is a protein kinase. This domain is at …	-	1e-59 emb|CCF38710.1| hypothetical protein CH063_09735 [Colletotrichum higginsianum]	-	5e-26 gnl|CDD|222455 pfam13924, Lipocalin_5, Lipocalin-like domain. This family includes domains distantly related to lipocalins. However, they do contain the important GXW motif in the first strand. The protein in this family include aln5, which is involved in biosynthesis of alnumycin. The family also includes the ZFK protein from Trypanosoma brucei which is a protein kinase. This domain is at …	-	1e-59 tr|H1VEQ7|H1VEQ7_COLHI Uncharacterized protein OS=Colletotrichum higginsianum (strain IMI 349063) GN=CH063_09735 PE=4 SV=1	-	-
c14252_g1	36.6143	23.1537	50.0749	2.16272	1.11285	0.000168829	0.000523553	28.61	65	-	-	-	-	-	-	-	-	-	-	-
c1427_g1	41.6145	58.5652	24.6638	0.421134	-1.24765	9.94e-06	3.51e-05	4.34	1.84	-	-	5e-130 gnl|CDD|217364 pfam03095, PTPA, Phosphotyrosyl phosphate activator (PTPA) protein. Phosphotyrosyl phosphatase activator (PTPA) proteins stimulate the phosphotyrosyl phosphatase (PTPase) activity of the dimeric form of protein phosphatase 2A (PP2A). PTPase activity in PP2A (in vitro) is relatively low when compared to the better recognised phosphoserine/ threonine protein phosphorylase acti…	9e-95 gnl|CDD|230806 KOG2867, KOG2867, KOG2867, Phosphotyrosyl phosphatase activator [Cell cycle control, cell division, chromosome partitioning, Signal transduction mechanisms].	0.0 gb|EGY14306.1| serine/threonine-protein phosphatase 2A activator 1 [Verticillium dahliae VdLs.17]	0.0 ref|XM_003001593.1| Verticillium albo-atrum VaMs.102 serine/threonine-protein phosphatase 2A activator 1, mRNA	1e-130 gnl|CDD|217364 pfam03095, PTPA, Phosphotyrosyl phosphate activator (PTPA) protein. Phosphotyrosyl phosphatase activator (PTPA) proteins stimulate the phosphotyrosyl phosphatase (PTPase) activity of the dimeric form of protein phosphatase 2A (PP2A). PTPase activity in PP2A (in vitro) is relatively low when compared to the better recognised phosphoserine/ threonine protein phosphorylase acti…	8e-135 sp|Q4I0M9|PTPA1_GIBZE Serine/threonine-protein phosphatase 2A activator 1 OS=Gibberella zeae (strain PH-1 / ATCC MYA-4620 / FGSC 9075 / NRRL 31084) GN=RRD1 PE=3 SV=1	0.0 tr|G2X5G5|G2X5G5_VERDV Serine/threonine-protein phosphatase 2A activator 1 OS=Verticillium dahliae (strain VdLs.17 / ATCC MYA-4575 / FGSC 10137) GN=VDAG_05470 PE=4 SV=1	GO:0005737,cytoplasm;GO:0006457,protein folding;GO:0003755,peptidyl-prolyl cis-trans isomerase activity;GO:0019211,phosphatase activator activity;GO:0000413,protein peptidyl-prolyl isomerization;GO:0005634,nucleus	K17605
c14281_g1	14.134	1.36198	26.9059	19.755	4.30415	5.32e-10	2.57e-09	0.25	4.94	-	-	-	-	2e-111 gb|EGY20367.1| hypothetical protein VDAG_09996 [Verticillium dahliae VdLs.17]	0.0 ref|XM_003007204.1| Verticillium albo-atrum VaMs.102 predicted protein, mRNA	-	-	2e-111 tr|G2XIL4|G2XIL4_VERDV Putative uncharacterized protein OS=Verticillium dahliae (strain VdLs.17 / ATCC MYA-4575 / FGSC 10137) GN=VDAG_09996 PE=4 SV=1	-	-
c1431_g1	31.5494	50.3933	12.7056	0.252128	-1.98777	1.01e-08	4.45e-08	2.68	0.68	-	-	6e-118 gnl|CDD|216443 pfam01341, Glyco_hydro_6, Glycosyl hydrolases family 6.	-	0.0 gb|EGY15398.1| exoglucanase-6A [Verticillium dahliae VdLs.17]	0.0 ref|XM_002999872.1| Verticillium albo-atrum VaMs.102 exoglucanase-6A, mRNA	1e-118 gnl|CDD|216443 pfam01341, Glyco_hydro_6, Glycosyl hydrolases family 6.	3e-141 sp|Q9C1S9|GUX6_HUMIN Exoglucanase-6A OS=Humicola insolens GN=cel6A PE=1 SV=1	0.0 tr|G2X8W1|G2X8W1_VERDV Exoglucanase-6A OS=Verticillium dahliae (strain VdLs.17 / ATCC MYA-4575 / FGSC 10137) GN=VDAG_06252 PE=4 SV=1	GO:0004553,hydrolase activity, hydrolyzing O-glycosyl compounds;GO:0030248,cellulose binding;GO:0005576,extracellular region;GO:0030245,cellulose catabolic process;GO:0016162,cellulose 1,4-beta-cellobiosidase activity	-
c14319_g1	42.6598	21.7917	63.5279	2.91523	1.54361	4.7e-08	1.98e-07	18.91	57.43	-	-	-	-	-	-	-	-	-	-	-
c14335_g1	46.6555	70.142	23.169	0.330316	-1.59808	5.52e-09	2.48e-08	11.24	3.75	-	-	-	-	5e-14 gb|EGY21094.1| hypothetical protein VDAG_02618 [Verticillium dahliae VdLs.17]	4e-68 ref|XM_003007916.1| Verticillium albo-atrum VaMs.102 predicted protein, mRNA	-	-	6e-14 tr|G2WYD6|G2WYD6_VERDV Putative uncharacterized protein OS=Verticillium dahliae (strain VdLs.17 / ATCC MYA-4575 / FGSC 10137) GN=VDAG_02618 PE=4 SV=1	-	-
c14349_g1	11.759	4.08594	19.4321	4.75583	2.2497	0.00011523	0.00036391	0.79	3.78	-	-	-	-	6e-112 gb|EGY21456.1| cell wall protein PhiA [Verticillium dahliae VdLs.17]	0.0 ref|XM_003008267.1| Verticillium albo-atrum VaMs.102 cell wall protein PhiA, mRNA	-	-	7e-112 tr|G2WXK1|G2WXK1_VERDV Cell wall protein PhiA OS=Verticillium dahliae (strain VdLs.17 / ATCC MYA-4575 / FGSC 10137) GN=VDAG_02980 PE=4 SV=1	-	-
c14398_g1	9.99013	2.04297	17.9373	8.78	3.13422	9.47e-06	3.35e-05	0.4	3.57	-	-	-	-	-	-	-	-	-	-	-
c1441_g1	63.4223	86.4858	40.3589	0.466654	-1.09958	1.13e-06	4.33e-06	10	4.7	-	-	-	-	-	-	-	-	-	-	-
c1442_g1	4.11063	0	8.22126	Inf	Inf	0.000275807	0.00083791	0	5.16	-	-	-	-	-	-	-	-	-	-	-
c14463_g1	8.95247	15.6628	2.24216	0.143152	-2.80438	0.000128547	0.000403942	2.12	0.31	-	-	2e-105 gnl|CDD|218648 pfam05592, Bac_rhamnosid, Bacterial alpha-L-rhamnosidase. This family consists of bacterial rhamnosidase A and B enzymes. L-Rhamnose is abundant in biomass as a common constituent of glycolipids and glycosides, such as plant pigments, pectic polysaccharides, gums or biosurfactants. Some rhamnosides are important bioactive compounds. For example, terpenyl glycosides, the glyc…	-	0.0 gb|EGY20355.1| alfa-L-rhamnosidase [Verticillium dahliae VdLs.17]	0.0 ref|XM_003007192.1| Verticillium albo-atrum VaMs.102 alfa-L-rhamnosidase, mRNA	5e-106 gnl|CDD|218648 pfam05592, Bac_rhamnosid, Bacterial alpha-L-rhamnosidase. This family consists of bacterial rhamnosidase A and B enzymes. L-Rhamnose is abundant in biomass as a common constituent of glycolipids and glycosides, such as plant pigments, pectic polysaccharides, gums or biosurfactants. Some rhamnosides are important bioactive compounds. For example, terpenyl glycosides, the glyc…	-	0.0 tr|G2XIK2|G2XIK2_VERDV Alfa-L-rhamnosidase OS=Verticillium dahliae (strain VdLs.17 / ATCC MYA-4575 / FGSC 10137) GN=VDAG_09984 PE=4 SV=1	GO:0008152,metabolic process;GO:0003824,catalytic activity	-
c1448_g1	28.651	40.8594	16.4425	0.402417	-1.31324	0.000128582	0.000403942	4.04	1.64	-	-	5e-69 gnl|CDD|153375 cd07363, 45_DOPA_Dioxygenase, The Class III extradiol dioxygenase, 4,5-DOPA Dioxygenase, catalyzes the incorporation of both atoms of molecular oxygen into 4,5-dihydroxy-phenylalanine. This subfamily is composed of plant 4,5-DOPA Dioxygenase, the uncharacterized Escherichia coli protein Jw3007, and similar proteins. 4,5-DOPA Dioxygenase catalyzes the incorporation of both ato…	-	0.0 gb|EGY19347.1| aromatic ring-opening dioxygenase family protein [Verticillium dahliae VdLs.17]	0.0 ref|XM_003006427.1| Verticillium albo-atrum VaMs.102 aromatic ring-opening dioxygenase family protein, mRNA	2e-21 gnl|CDD|217276 pfam02900, LigB, Catalytic LigB subunit of aromatic ring-opening dioxygenase.	9e-16 sp|Q949R4|DIOXL_ARATH 4,5-DOPA dioxygenase extradiol-like protein OS=Arabidopsis thaliana GN=At4g15093 PE=2 SV=1	0.0 tr|G2XHQ3|G2XHQ3_VERDV Aromatic ring-opening dioxygenase family protein OS=Verticillium dahliae (strain VdLs.17 / ATCC MYA-4575 / FGSC 10137) GN=VDAG_09807 PE=4 SV=1	GO:0006725,cellular aromatic compound metabolic process;GO:0016702,oxidoreductase activity, acting on single donors with incorporation of molecular oxygen, incorporation of two atoms of oxygen;GO:0008198,ferrous iron binding;GO:0055114,oxidation-reduction process;GO:0008270,zinc ion binding;GO:0016701,oxidoreductase activity, acting on single donors with incorporation of molecular oxygen	-
c14497_g1	29.9789	13.6198	46.338	3.40225	1.76649	2.9e-07	1.15e-06	6.28	21.94	-	-	-	-	-	-	-	-	-	-	-
c14543_g1	22.2309	11.5768	32.885	2.84059	1.50619	0.000120767	0.000380431	2.6	7.49	-	-	-	-	3e-37 gb|EGY13593.1| hypothetical protein VDAG_00275 [Verticillium dahliae VdLs.17]	2e-160 ref|XM_003008933.1| Verticillium albo-atrum VaMs.102 predicted protein, mRNA	-	-	4e-37 tr|G2WRU2|G2WRU2_VERDV Putative uncharacterized protein OS=Verticillium dahliae (strain VdLs.17 / ATCC MYA-4575 / FGSC 10137) GN=VDAG_00275 PE=4 SV=1	-	-
c1457_g1	1197.14	1820.29	573.993	0.315331	-1.66506	8.67e-208	2.75e-206	31.47	9.94	VDBG_07269	alcohol dehydrogenase	8e-105 gnl|CDD|187652 cd08948, 5beta-POR_like_SDR_a, progesterone 5-beta-reductase-like proteins (5beta-POR), atypical (a) SDRs. 5beta-POR catalyzes the reduction of progesterone to 5beta-pregnane-3,20-dione in Digitalis plants. This subgroup of atypical-extended SDRs, shares the structure of an extended SDR, but has a different glycine-rich nucleotide binding motif (GXXGXXG) and lacks the YXXXK …	2e-98 gnl|CDD|229180 KOG1238, KOG1238, KOG1238, Glucose dehydrogenase/choline dehydrogenase/mandelonitrile lyase (GMC oxidoreductase family) [General function prediction only].	0.0 ref|XP_003002698.1| alcohol dehydrogenase [Verticillium alfalfae VaMs.102] gb|EEY21159.1| alcohol dehydrogenase [Verticillium alfalfae VaMs.102]	0.0 ref|XM_003002652.1| Verticillium albo-atrum VaMs.102 alcohol dehydrogenase, mRNA	7e-37 gnl|CDD|218493 pfam05199, GMC_oxred_C, GMC oxidoreductase. This domain found associated with pfam00732.	3e-75 sp|O74913|YJ72_SCHPO Uncharacterized protein C757.02c OS=Schizosaccharomyces pombe (strain 972 / ATCC 24843) GN=SPCC757.02c PE=4 SV=1	0.0 tr|C9SQN4|C9SQN4_VERA1 Alcohol dehydrogenase OS=Verticillium albo-atrum (strain VaMs.102 / ATCC MYA-4576 / FGSC 10136) GN=VDBG_07269 PE=3 SV=1	GO:0050660,flavin adenine dinucleotide binding;GO:0006066,alcohol metabolic process;GO:0008812,choline dehydrogenase activity;GO:0000166,nucleotide binding	-
c14577_g1	338.915	8.17188	669.659	81.9467	6.35661	0	0	2.22	184.87	-	-	-	-	-	-	-	-	-	-	-
c1464_g1	31.9895	49.0313	14.9477	0.304861	-1.71378	3.22e-07	1.27e-06	3.88	1.19	-	-	-	-	1e-155 gb|EGY19185.1| hypothetical protein VDAG_09519 [Verticillium dahliae VdLs.17]	0.0 ref|XM_003000019.1| Verticillium albo-atrum VaMs.102 predicted protein, mRNA	-	-	2e-155 tr|G2XH87|G2XH87_VERDV Putative uncharacterized protein OS=Verticillium dahliae (strain VdLs.17 / ATCC MYA-4575 / FGSC 10137) GN=VDAG_09519 PE=4 SV=1	-	-
c1465_g1	201.096	282.611	119.582	0.423133	-1.24082	2.6e-22	2.68e-21	11.77	4.99	-	-	2e-102 gnl|CDD|213279 cd05911, Firefly_Luc_like, Firefly luciferase of light emitting insects and 4-Coumarate-CoA Ligase (4CL). This family contains two functionally unique groups of proteins; one group is insect firefly luciferases and the other is plant 4-coumarate:coenzyme A ligases. However, they share significant sequence similarity in spite of their functional diversity. Luciferase catalyze…	7e-68 gnl|CDD|229119 KOG1176, KOG1176, KOG1176, Acyl-CoA synthetase [Lipid transport and metabolism].	0.0 gb|EGY18328.1| 4-coumarate-CoA ligase [Verticillium dahliae VdLs.17]	0.0 ref|XM_003008639.1| Verticillium albo-atrum VaMs.102 4-coumarate-CoA ligase, mRNA	2e-68 gnl|CDD|215954 pfam00501, AMP-binding, AMP-binding enzyme.	5e-53 sp|Q9M0X9|4CLL7_ARATH 4-coumarate--CoA ligase-like 7 OS=Arabidopsis thaliana GN=4CLL7 PE=1 SV=1	0.0 tr|G2XES7|G2XES7_VERDV 4-coumarate-CoA ligase OS=Verticillium dahliae (strain VdLs.17 / ATCC MYA-4575 / FGSC 10137) GN=VDAG_08662 PE=4 SV=1	GO:0016874,ligase activity;GO:0031408,oxylipin biosynthetic process;GO:0009695,jasmonic acid biosynthetic process;GO:0004321,fatty-acyl-CoA synthase activity;GO:0005524,ATP binding;GO:0005777,peroxisome	-
c14662_g1	6.69328	0.68099	12.7056	18.6575	4.22168	3.37e-05	0.000113072	0.1	1.94	-	-	-	-	4e-167 gb|EGY18915.1| pectate lyase L [Verticillium dahliae VdLs.17]	0.0 ref|XM_003002023.1| Verticillium albo-atrum VaMs.102 pectate lyase L, mRNA	-	2e-37 sp|P0C1A6|PLYL_ERWCH Pectate lyase L OS=Erwinia chrysanthemi GN=pelL PE=3 SV=1	4e-167 tr|G2XGG7|G2XGG7_VERDV Pectate lyase L OS=Verticillium dahliae (strain VdLs.17 / ATCC MYA-4575 / FGSC 10137) GN=VDAG_09249 PE=4 SV=1	GO:0030570,pectate lyase activity;GO:0045490,pectin catabolic process;GO:0016829,lyase activity;GO:0005576,extracellular region;GO:0046872,metal ion binding	-
c14737_g1	86.5573	56.5222	116.592	2.06277	1.04458	4.64e-08	1.96e-07	12.23	25.57	-	-	-	-	2e-74 gb|EGY20012.1| cell division protease ftsH [Verticillium dahliae VdLs.17]	0.0 ref|XM_003007294.1| Verticillium albo-atrum VaMs.102 cell division protease ftsH, mRNA	-	-	3e-74 tr|G2WWP2|G2WWP2_VERDV Cell division protease ftsH OS=Verticillium dahliae (strain VdLs.17 / ATCC MYA-4575 / FGSC 10137) GN=VDAG_02028 PE=3 SV=1	GO:0016020,membrane;GO:0006508,proteolysis;GO:0004222,metalloendopeptidase activity;GO:0005524,ATP binding;GO:0017111,nucleoside-triphosphatase activity;GO:0030163,protein catabolic process;GO:0051301,cell division	-
c14743_g1	20.113	1.36198	38.8641	28.535	4.83466	6.66e-15	5.08e-14	0.25	7.32	-	-	-	-	-	-	-	-	-	-	-
c14746_g1	5.10743	10.2149	0	0	#NAME?	6.31e-05	0.000205626	1.13	0	VDBG_07698	hypothetical protein	-	-	0.0 ref|XP_003002239.1| conserved hypothetical protein [Verticillium alfalfae VaMs.102] gb|EEY21588.1| conserved hypothetical protein [Verticillium alfalfae VaMs.102]	0.0 ref|XM_003002193.1| Verticillium albo-atrum VaMs.102 conserved hypothetical protein, mRNA	-	-	0.0 tr|C9SS23|C9SS23_VERA1 Putative uncharacterized protein OS=Verticillium albo-atrum (strain VaMs.102 / ATCC MYA-4576 / FGSC 10136) GN=VDBG_07698 PE=4 SV=1	-	-
c1476_g1	431.258	582.247	280.27	0.48136	-1.05481	1.57e-34	2.23e-33	15.54	7.49	VDBG_01665	hypothetical protein	-	-	5e-130 ref|XP_003007477.1| conserved hypothetical protein [Verticillium alfalfae VaMs.102] gb|EEY15556.1| conserved hypothetical protein [Verticillium alfalfae VaMs.102]	0.0 ref|XM_003007431.1| Verticillium albo-atrum VaMs.102 conserved hypothetical protein, mRNA	-	-	6e-130 tr|C9SAY2|C9SAY2_VERA1 Putative uncharacterized protein OS=Verticillium albo-atrum (strain VaMs.102 / ATCC MYA-4576 / FGSC 10136) GN=VDBG_01665 PE=4 SV=1	-	-
c14833_g1	250.616	33.3685	467.864	14.0211	3.80953	9.61e-14	6.75e-13	29.9	437	-	-	-	-	-	2e-57 gb|CP003014.1| Thielavia terrestris NRRL 8126 chromosome 6, complete sequence	-	-	-	-	-
c1489_g1	818.454	1163.81	473.096	0.406505	-1.29865	6.37e-93	1.55e-91	64.8	26.45	-	-	-	-	0.0 gb|EGY16731.1| hypothetical protein VDAG_07895 [Verticillium dahliae VdLs.17]	-	-	-	0.0 tr|G2XCL3|G2XCL3_VERDV Putative uncharacterized protein OS=Verticillium dahliae (strain VdLs.17 / ATCC MYA-4575 / FGSC 10137) GN=VDAG_07895 PE=4 SV=1	-	-
c1490_g1	17.3235	27.9206	6.72648	0.240915	-2.05341	1.52e-05	5.29e-05	3.21	0.78	VDBG_08539	hypothetical protein	-	-	8e-58 ref|XP_003001494.1| predicted protein [Verticillium alfalfae VaMs.102] gb|EEY22429.1| predicted protein [Verticillium alfalfae VaMs.102]	3e-110 ref|XM_003001448.1| Verticillium albo-atrum VaMs.102 predicted protein, mRNA	-	-	9e-58 tr|C9SUB8|C9SUB8_VERA1 Predicted protein OS=Verticillium albo-atrum (strain VaMs.102 / ATCC MYA-4576 / FGSC 10136) GN=VDBG_08539 PE=4 SV=1	-	-
c1496_g1	152.341	247.88	56.8014	0.229148	-2.12565	1.02e-40	1.63e-39	20.55	4.73	VDBG_05619	hypothetical protein	-	-	3e-63 ref|XP_003004506.1| predicted protein [Verticillium alfalfae VaMs.102] gb|EEY19510.1| predicted protein [Verticillium alfalfae VaMs.102]	0.0 ref|XM_003004460.1| Verticillium albo-atrum VaMs.102 predicted protein, mRNA	-	-	4e-63 tr|C9SLE2|C9SLE2_VERA1 Predicted protein OS=Verticillium albo-atrum (strain VaMs.102 / ATCC MYA-4576 / FGSC 10136) GN=VDBG_05619 PE=4 SV=1	-	-
c1515_g1	297.148	412.68	181.615	0.440087	-1.18414	1.04e-29	1.33e-28	10.54	4.65	-	-	4e-63 gnl|CDD|199869 cd06248, M14_CP_A-B_like_1, Peptidase M14 carboxypeptidase subfamily A/B-like; uncharacterized subgroup. The Peptidase M14 Carboxypeptidase A/B-like subfamily is one of two main M14 carboxypeptidase subfamilies, defined by sequence and structural homology, the other being N/E. Carboxypeptidases (CPs) hydrolyze single, C-terminal amino acids from polypeptide chains. They have …	2e-47 gnl|CDD|228107 KOG0157, KOG0157, KOG0157, Cytochrome P450 CYP4/CYP19/CYP26 subfamilies [Secondary metabolites biosynthesis, transport and catabolism, Lipid transport and metabolism].	0.0 gb|EGY15995.1| cytochrome P450 52A11 [Verticillium dahliae VdLs.17]	0.0 ref|XM_003004351.1| Verticillium albo-atrum VaMs.102 cytochrome P450 52A11, mRNA	3e-43 gnl|CDD|215689 pfam00067, p450, Cytochrome P450. Cytochrome P450s are haem-thiolate proteins involved in the oxidative degradation of various compounds. They are particularly well known for their role in the degradation of environmental toxins and mutagens. They can be divided into 4 classes, according to the method by which electrons from NAD(P)H are delivered to the catalytic site. Sequen…	3e-43 sp|C5FVN6|MCPA_ARTOC Metallocarboxypeptidase A OS=Arthroderma otae (strain ATCC MYA-4605 / CBS 113480) GN=MCPA PE=3 SV=1	0.0 tr|G2X9W4|G2X9W4_VERDV Cytochrome P450 52A11 OS=Verticillium dahliae (strain VdLs.17 / ATCC MYA-4575 / FGSC 10137) GN=VDAG_07159 PE=3 SV=1	GO:0009055,electron carrier activity;GO:0020037,heme binding;GO:0006508,proteolysis;GO:0004497,monooxygenase activity;GO:0009405,pathogenesis;GO:0005506,iron ion binding;GO:0016705,oxidoreductase activity, acting on paired donors, with incorporation or reduction of molecular oxygen;GO:0008270,zinc ion binding;GO:0005576,extracellular region;GO:0004181,metallocarboxypeptidase activity;GO:0046872,m…	-
c1517_g1	372.46	140.284	604.636	4.31009	2.10772	6.49e-13	4.34e-12	4.4	18.98	-	-	9e-41 gnl|CDD|192537 pfam10329, DUF2417, Region of unknown function (DUF2417). This is a region of a family of proteins conserved in fungi some of whose members also have the Abhydrolase_1, pfam00561, domain in their sequence. The function of this region is not known.	-	0.0 gb|EGY22759.1| mitochondrial integral membrane protein [Verticillium dahliae VdLs.17]	0.0 ref|XM_003005001.1| Verticillium albo-atrum VaMs.102 mitochondrial integral membrane protein, mRNA	2e-41 gnl|CDD|192537 pfam10329, DUF2417, Region of unknown function (DUF2417). This is a region of a family of proteins conserved in fungi some of whose members also have the Abhydrolase_1, pfam00561, domain in their sequence. The function of this region is not known.	4e-52 sp|O13912|YDW6_SCHPO Uncharacterized protein C23C11.06c OS=Schizosaccharomyces pombe (strain 972 / ATCC 24843) GN=SPAC23C11.06c PE=4 SV=1	0.0 tr|G2X303|G2X303_VERDV Mitochondrial integral membrane protein OS=Verticillium dahliae (strain VdLs.17 / ATCC MYA-4575 / FGSC 10137) GN=VDAG_04197 PE=4 SV=1	GO:0016020,membrane;GO:0033554,cellular response to stress;GO:0005737,cytoplasm;GO:0016021,integral to membrane	-
c1518_g1	802.131	1268.68	335.577	0.264508	-1.91862	2.2e-176	6.78e-175	23.35	6.19	-	-	3e-95 gnl|CDD|187611 cd05353, hydroxyacyl-CoA-like_DH_SDR_c-like, (3R)-hydroxyacyl-CoA dehydrogenase-like, classical(c)-like SDRs. Beta oxidation of fatty acids in eukaryotes occurs by a four-reaction cycle, that may take place in mitochondria or in peroxisomes. (3R)-hydroxyacyl-CoA dehydrogenase is part of rat peroxisomal multifunctional MFE-2, it is a member of the NAD-dependent SDRs, but conta…	5e-67 gnl|CDD|229148 KOG1206, KOG1206, KOG1206, Peroxisomal multifunctional beta-oxidation protein and related enzymes [Lipid transport and metabolism].	0.0 gb|EGY23521.1| peroxisomal hydratase-dehydrogenase-epimerase [Verticillium dahliae VdLs.17]	0.0 ref|XM_003002810.1| Verticillium albo-atrum VaMs.102 peroxisomal hydratase-dehydrogenase-epimerase, mRNA	3e-31 gnl|CDD|215720 pfam00106, adh_short, short chain dehydrogenase. This family contains a wide variety of dehydrogenases.	0.0 sp|Q01373|FOX2_NEUCR Peroxisomal hydratase-dehydrogenase-epimerase OS=Neurospora crassa (strain ATCC 24698 / 74-OR23-1A / CBS 708.71 / DSM 1257 / FGSC 987) GN=fox-2 PE=1 SV=1	0.0 tr|G2X477|G2X477_VERDV Peroxisomal hydratase-dehydrogenase-epimerase OS=Verticillium dahliae (strain VdLs.17 / ATCC MYA-4575 / FGSC 10137) GN=VDAG_04959 PE=3 SV=1	GO:0016616,oxidoreductase activity, acting on the CH-OH group of donors, NAD or NADP as acceptor;GO:0005777,peroxisome;GO:0055114,oxidation-reduction process;GO:0006635,fatty acid beta-oxidation;GO:0016829,lyase activity;GO:0000166,nucleotide binding;GO:0016491,oxidoreductase activity;GO:0016853,isomerase activity	K14729
c1522_g1	395.208	547.516	242.901	0.443641	-1.17253	2.66e-38	4.09e-37	10.76	4.78	-	-	-	-	0.0 gb|EGY18552.1| hypothetical protein VDAG_09078 [Verticillium dahliae VdLs.17]	0.0 ref|XM_003000396.1| Verticillium albo-atrum VaMs.102 conserved hypothetical protein, mRNA	-	-	0.0 tr|G2XFF4|G2XFF4_VERDV Putative uncharacterized protein OS=Verticillium dahliae (strain VdLs.17 / ATCC MYA-4575 / FGSC 10137) GN=VDAG_09078 PE=4 SV=1	-	-
c1526_g1	2309	1273.45	3344.56	2.62637	1.39307	0	0	24	63.15	-	-	5e-128 gnl|CDD|233334 TIGR01263, 4HPPD, 4-hydroxyphenylpyruvate dioxygenase. This protein oxidizes 4-hydroxyphenylpyruvate, a tyrosine and phenylalanine catabolite, to homogentisate. Homogentisate can undergo a further non-enzymatic oxidation and polymerization into brown pigments that protect some bacterial species from light. A similar process occurs spontaneously in blood and is hemolytic (see…	2e-125 gnl|CDD|228585 KOG0638, KOG0638, KOG0638, 4-hydroxyphenylpyruvate dioxygenase [Amino acid transport and metabolism].	0.0 gb|EGY22485.1| suppressor of stem-loop protein [Verticillium dahliae VdLs.17]	0.0 ref|XM_003006826.1| Verticillium albo-atrum VaMs.102 suppressor of stem-loop protein, mRNA	8e-61 gnl|CDD|190848 pfam04056, Ssl1, Ssl1-like. Ssl1-like proteins are 40kDa subunits of the Transcription factor II H complex.	0.0 sp|Q872T7|HPPD_NEUCR 4-hydroxyphenylpyruvate dioxygenase OS=Neurospora crassa (strain ATCC 24698 / 74-OR23-1A / CBS 708.71 / DSM 1257 / FGSC 987) GN=B23G1.170 PE=3 SV=1	0.0 tr|G2X0Z4|G2X0Z4_VERDV Suppressor of stem-loop protein OS=Verticillium dahliae (strain VdLs.17 / ATCC MYA-4575 / FGSC 10137) GN=VDAG_03923 PE=4 SV=1	GO:0006559,L-phenylalanine catabolic process;GO:0006572,tyrosine catabolic process;GO:0003868,4-hydroxyphenylpyruvate dioxygenase activity;GO:0006355,regulation of transcription, DNA-dependent;GO:0008270,zinc ion binding;GO:0005634,nucleus;GO:0006281,DNA repair;GO:0046872,metal ion binding	K03142-ko03022,Basal transcription factors;ko03420,Nucleotide excision repair;ko05203,Viral carcinogenesis
c1529_g1	192.982	257.414	128.551	0.499392	-1.00176	5.96e-15	4.55e-14	11.99	6.03	-	-	2e-20 gnl|CDD|227367 COG5034, TNG2, Chromatin remodeling protein, contains PhD zinc finger [Chromatin structure and dynamics].	1e-22 gnl|CDD|229912 KOG1973, KOG1973, KOG1973, Chromatin remodeling protein, contains PHD Zn-finger [Chromatin structure and dynamics].	2e-107 gb|EGY15043.1| hypothetical protein VDAG_06533 [Verticillium dahliae VdLs.17]	0.0 ref|XM_003001030.1| Verticillium albo-atrum VaMs.102 conserved hypothetical protein, mRNA	5e-09 gnl|CDD|201356 pfam00628, PHD, PHD-finger. PHD folds into an interleaved type of Zn-finger chelating 2 Zn ions in a similar manner to that of the RING and FYVE domains. Several PHD fingers have been identified as binding modules of methylated histone H3.	1e-14 sp|Q9QXV3|ING1_MOUSE Inhibitor of growth protein 1 OS=Mus musculus GN=Ing1 PE=2 SV=1	3e-107 tr|G2X7S5|G2X7S5_VERDV Putative uncharacterized protein OS=Verticillium dahliae (strain VdLs.17 / ATCC MYA-4575 / FGSC 10137) GN=VDAG_06533 PE=4 SV=1	GO:0010941,regulation of cell death;GO:0006606,protein import into nucleus;GO:0045893,positive regulation of transcription, DNA-dependent;GO:0008270,zinc ion binding;GO:0005634,nucleus;GO:0046872,metal ion binding;GO:0007049,cell cycle	-
c153_g1	21.6495	8.17188	35.1272	4.29854	2.10385	5.44e-07	2.12e-06	1	4.33	-	-	-	-	5e-42 gb|EGY13767.1| hypothetical protein VDAG_00449 [Verticillium dahliae VdLs.17]	-	-	-	6e-42 tr|G2WSB6|G2WSB6_VERDV Putative uncharacterized protein OS=Verticillium dahliae (strain VdLs.17 / ATCC MYA-4575 / FGSC 10137) GN=VDAG_00449 PE=4 SV=1	-	-
c15325_g1	4.11063	0	8.22126	Inf	Inf	0.000275807	0.00083791	0	10.23	-	-	-	-	-	-	-	-	-	-	-
c1533_g1	214.127	329.599	98.6551	0.299318	-1.74025	1.81e-41	2.92e-40	21.51	6.47	-	-	-	-	-	-	-	-	-	-	-
c15451_g1	80.3288	46.3073	114.35	2.46938	1.30415	1.03e-10	5.43e-10	32.62	83.49	-	-	-	-	1e-19 gb|EGY15072.1| 50S ribosomal subunit L30 [Verticillium dahliae VdLs.17]	2e-82 ref|XM_003001059.1| Verticillium albo-atrum VaMs.102 50S ribosomal subunit L30, mRNA	-	-	1e-19 tr|G2X7V4|G2X7V4_VERDV 50S ribosomal subunit L30 OS=Verticillium dahliae (strain VdLs.17 / ATCC MYA-4575 / FGSC 10137) GN=VDAG_06562 PE=4 SV=1	-	-
c1546_g1	82.2406	114.406	50.0749	0.437694	-1.19201	2.27e-09	1.05e-08	6.58	2.89	-	-	1e-18 gnl|CDD|213391 cd12148, fungal_TF_MHR, fungal transcription factor regulatory middle homology region. This domain is present in the large family of fungal zinc cluster transcription factors that contain an N-terminal GAL4-like C6 zinc binuclear cluster DNA-binding domain. Examples of members of this large fungal group are the following Saccharomyces cerevisiae transcription factors, GAL4, S…	-	0.0 gb|EGY22029.1| hypothetical protein VDAG_03469 [Verticillium dahliae VdLs.17]	0.0 ref|XM_003003828.1| Verticillium albo-atrum VaMs.102 conserved hypothetical protein, mRNA	6e-08 gnl|CDD|217880 pfam04082, Fungal_trans, Fungal specific transcription factor domain.	2e-113 sp|Q5B8L0|PRTT_EMENI Transcriptional activator of proteases prtT OS=Emericella nidulans (strain FGSC A4 / ATCC 38163 / CBS 112.46 / NRRL 194 / M139) GN=prtT PE=3 SV=1	0.0 tr|G2WZM7|G2WZM7_VERDV Putative uncharacterized protein OS=Verticillium dahliae (strain VdLs.17 / ATCC MYA-4575 / FGSC 10137) GN=VDAG_03469 PE=4 SV=1	GO:0000981,sequence-specific DNA binding RNA polymerase II transcription factor activity;GO:0003677,DNA binding;GO:0006357,regulation of transcription from RNA polymerase II promoter;GO:0008270,zinc ion binding;GO:0005634,nucleus;GO:0006366,transcription from RNA polymerase II promoter;GO:0046872,metal ion binding	-
c15469_g1	550.039	744.322	355.756	0.47796	-1.06504	2.45e-44	4.17e-43	19.49	9.33	-	-	9e-27 gnl|CDD|212820 cd11887, SH3_Bbc1, Src Homology 3 domain of Bbc1 and similar domains. This subfamily is composed of Saccharomyces cerevisiae Bbc1p, also called Mti1p (Myosin tail region-interacting protein), and similar proteins. Bbc1p interacts with and regulates type I myosins in yeast, Myo3p and Myo5p, which are involved in actin cytoskeletal reorganization. It also binds and inhibits Las…	2e-09 gnl|CDD|229206 KOG1264, KOG1264, KOG1264, Phospholipase C [Lipid transport and metabolism].	0.0 gb|EGY20608.1| SH3 domain-containing protein [Verticillium dahliae VdLs.17]	0.0 ref|XM_003001165.1| Verticillium albo-atrum VaMs.102 SH3 domain-containing protein, mRNA	6e-08 gnl|CDD|215659 pfam00018, SH3_1, SH3 domain. SH3 (Src homology 3) domains are often indicative of a protein involved in signal transduction related to cytoskeletal organisation. First described in the Src cytoplasmic tyrosine kinase. The structure is a partly opened beta barrel.	2e-50 sp|O42854|YFHH_SCHPO SH3 domain-containing protein C23A1.17 OS=Schizosaccharomyces pombe (strain 972 / ATCC 24843) GN=SPAC23A1.17 PE=1 SV=1	0.0 tr|G2XJA5|G2XJA5_VERDV SH3 domain-containing protein OS=Verticillium dahliae (strain VdLs.17 / ATCC MYA-4575 / FGSC 10137) GN=VDAG_10237 PE=4 SV=1	GO:0030479,actin cortical patch;GO:0017024,myosin I binding;GO:0030036,actin cytoskeleton organization;GO:0032153,cell division site;GO:0005829,cytosol;GO:0051286,cell tip	-
c15470_g1	3600.58	5004.6	2196.57	0.43891	-1.188	0	0	1680.72	753	-	-	-	-	-	-	-	-	-	-	-
c15480_g1	1541.52	773.605	2309.43	2.98528	1.57787	0	0	15.24	45.56	-	-	6e-137 gnl|CDD|176190 cd05288, PGDH, Prostaglandin dehydrogenases. Prostaglandins and related eicosanoids are metabolized by the oxidation of the 15(S)-hydroxyl group of the NAD+-dependent (type I 15-PGDH) 15-prostaglandin dehydrogenase (15-PGDH) followed by reduction by NADPH/NADH-dependent (type II 15-PGDH) delta-13 15-prostaglandin reductase (13-PGR) to 15-keto-13,14,-dihydroprostaglandins. 13…	1e-107 gnl|CDD|229138 KOG1196, KOG1196, KOG1196, Predicted NAD-dependent oxidoreductase [General function prediction only].	0.0 gb|EGY21338.1| interferon-induced GTP-binding protein Mx [Verticillium dahliae VdLs.17]	0.0 ref|XM_003008157.1| Verticillium albo-atrum VaMs.102 conserved hypothetical protein, mRNA	6e-31 gnl|CDD|215874 pfam00350, Dynamin_N, Dynamin family.	7e-86 sp|Q9C0Y6|YKM8_SCHPO Zinc-type alcohol dehydrogenase-like protein PB24D3.08c OS=Schizosaccharomyces pombe (strain 972 / ATCC 24843) GN=SPAPB24D3.08c PE=3 SV=1	0.0 tr|G2WX83|G2WX83_VERDV Interferon-induced GTP-binding protein Mx OS=Verticillium dahliae (strain VdLs.17 / ATCC MYA-4575 / FGSC 10137) GN=VDAG_02862 PE=3 SV=1	GO:0033554,cellular response to stress;GO:0006184,GTP catabolic process;GO:0003924,GTPase activity;GO:0005525,GTP binding;GO:0000166,nucleotide binding;GO:0005829,cytosol;GO:0008270,zinc ion binding;GO:0016491,oxidoreductase activity;GO:0005634,nucleus	-
c15483_g1	5941.21	7975.08	3907.34	0.489944	-1.02931	0	0	218.6	107.29	-	-	5e-45 gnl|CDD|129794 TIGR00711, efflux_EmrB, drug resistance transporter, EmrB/QacA subfamily. This subfamily of drug efflux proteins, a part of the major faciliator family, is predicted to have 14 potential membrane-spanning regions. Members with known activities include EmrB (multiple drug resistance efflux pump) in E. coli, FarB (antibacterial fatty acid resistance) in Neisseria gonorrhoeae, T…	8e-17 gnl|CDD|228203 KOG0254, KOG0254, KOG0254, Predicted transporter (major facilitator superfamily) [General function prediction only].	0.0 gb|EOO04245.1| putative efflux pump antibiotic resistance protein [Togninia minima UCRPA7]	-	8e-33 gnl|CDD|219516 pfam07690, MFS_1, Major Facilitator Superfamily.	3e-55 sp|Q00357|TOXA_COCCA Putative HC-toxin efflux carrier TOXA OS=Cochliobolus carbonum GN=TOXA PE=3 SV=1	0.0 tr|R8BY40|R8BY40_9PEZI Putative efflux pump antibiotic resistance protein OS=Togninia minima UCRPA7 GN=UCRPA7_224 PE=4 SV=1	GO:0019534,toxin transporter activity;GO:0016021,integral to membrane;GO:0055085,transmembrane transport	-
c15488_g1	2689.84	3878.92	1500.75	0.3869	-1.36997	0	0	198.89	77.2	-	-	0.0 gnl|CDD|143410 cd07091, ALDH_F1-2_Ald2-like, ALDH subfamily: ALDH families 1and 2, including 10-formyltetrahydrofolate dehydrogenase, NAD+-dependent retinal dehydrogenase 1 and related proteins. ALDH subfamily which includes the NAD+-dependent retinal dehydrogenase 1 (RALDH 1, ALDH1, EC=1.2.1.36), also known as aldehyde dehydrogenase family 1 member A1 (ALDH1A1), in humans, a homotetrameric, …	0.0 gnl|CDD|230389 KOG2450, KOG2450, KOG2450, Aldehyde dehydrogenase [Energy production and conversion].	0.0 gb|EGY19997.1| aldehyde dehydrogenase [Verticillium dahliae VdLs.17]	0.0 ref|XM_003007308.1| Verticillium albo-atrum VaMs.102 aldehyde dehydrogenase, mRNA	0.0 gnl|CDD|215767 pfam00171, Aldedh, Aldehyde dehydrogenase family. This family of dehydrogenases act on aldehyde substrates. Members use NADP as a cofactor. The family includes the following members: The prototypical members are the aldehyde dehydrogenases EC:1.2.1.3. Succinate-semialdehyde dehydrogenase EC:1.2.1.16. Lactaldehyde dehydrogenase EC:1.2.1.22. Benzaldehyde dehydrogenase EC:1.2.1.28…	0.0 sp|P40108|ALDH_DAVTA Aldehyde dehydrogenase OS=Davidiella tassiana GN=CLAH10 PE=1 SV=2	0.0 tr|G2WWM7|G2WWM7_VERDV Aldehyde dehydrogenase OS=Verticillium dahliae (strain VdLs.17 / ATCC MYA-4575 / FGSC 10137) GN=VDAG_02013 PE=3 SV=1	GO:0005737,cytoplasm;GO:0004029,aldehyde dehydrogenase (NAD) activity;GO:0016620,oxidoreductase activity, acting on the aldehyde or oxo group of donors, NAD or NADP as acceptor	K00128-ko00010,Glycolysis / Gluconeogenesis;ko00040,Pentose and glucuronate interconversions;ko00053,Ascorbate and aldarate metabolism;ko00620,Pyruvate metabolism;ko00640,Propanoate metabolism;ko00071,Fatty acid degradation;ko00561,Glycerolipid metabolism;ko00280,Valine, leucine and isoleucine degradation;ko00310,Lysine degradation;ko00330,Arginine and proline metabolism;ko00340,Histidine metabol…
c15489_g1	860.854	508.7	1213.01	2.38453	1.2537	8.35e-13	5.53e-12	17.57	41.99	-	-	3e-55 gnl|CDD|128949 smart00709, Zpr1, Duplicated domain in the epidermal growth factor- and elongation factor-1alpha-binding protein Zpr1. Also present in archaeal proteins.	7e-163 gnl|CDD|230642 KOG2703, KOG2703, KOG2703, C4-type Zn-finger protein [General function prediction only].	0.0 gb|EGY20015.1| zinc finger protein ZPR1 [Verticillium dahliae VdLs.17]	0.0 ref|XM_003007291.1| Verticillium albo-atrum VaMs.102 zinc finger protein zpr1, mRNA	2e-55 gnl|CDD|217516 pfam03367, zf-ZPR1, ZPR1 zinc-finger domain. The zinc-finger protein ZPR1 is ubiquitous among eukaryotes. It is indeed known to be an essential protein in yeast. In quiescent cells, ZPR1 is localised to the cytoplasm. But in proliferating cells treated with EGF or with other mitogens, ZPR1 accumulates in the nucleolus. ZPR1 interacts with the cytoplasmic domain of the inactiv…	4e-131 sp|O13724|ZPR1_SCHPO Zinc finger protein zpr1 OS=Schizosaccharomyces pombe (strain 972 / ATCC 24843) GN=zpr1 PE=3 SV=1	0.0 tr|G2WWP5|G2WWP5_VERDV Zinc finger protein ZPR1 OS=Verticillium dahliae (strain VdLs.17 / ATCC MYA-4575 / FGSC 10137) GN=VDAG_02031 PE=4 SV=1	GO:0007346,regulation of mitotic cell cycle;GO:0031669,cellular response to nutrient levels;GO:0002181,cytoplasmic translation;GO:0005829,cytosol;GO:0008270,zinc ion binding;GO:0005634,nucleus;GO:0046872,metal ion binding	K06874
c15509_g1	639.747	912.527	366.967	0.402144	-1.31422	1.4e-74	3.11e-73	52.5	21.19	-	-	2e-11 gnl|CDD|215754 pfam00153, Mito_carr, Mitochondrial carrier protein.	2e-49 gnl|CDD|228705 KOG0758, KOG0758, KOG0758, Mitochondrial carnitine-acylcarnitine carrier protein [Energy production and conversion].	0.0 gb|EGY17224.1| integral membrane ornithine transporter of mitochondria [Verticillium dahliae VdLs.17]	0.0 ref|XM_003005676.1| Verticillium albo-atrum VaMs.102 mitochondrial carrier protein, mRNA	5e-12 gnl|CDD|215754 pfam00153, Mito_carr, Mitochondrial carrier protein.	8e-42 sp|O59674|YB8B_SCHPO Uncharacterized mitochondrial carrier C29A3.11c OS=Schizosaccharomyces pombe (strain 972 / ATCC 24843) GN=SPBC29A3.11c PE=3 SV=1	0.0 tr|G2WSY3|G2WSY3_VERDV Integral membrane ornithine transporter of mitochondria OS=Verticillium dahliae (strain VdLs.17 / ATCC MYA-4575 / FGSC 10137) GN=VDAG_00906 PE=3 SV=1	GO:0006839,mitochondrial transport;GO:0005743,mitochondrial inner membrane;GO:0016021,integral to membrane;GO:0006810,transport;GO:0046943,carboxylic acid transmembrane transporter activity	-
c1551_g1	153.453	209.745	97.1603	0.463231	-1.1102	1.89e-14	1.4e-13	8.83	4.1	-	-	-	-	0.0 gb|EGY19180.1| hypothetical protein VDAG_09514 [Verticillium dahliae VdLs.17]	0.0 ref|XM_003000015.1| Verticillium albo-atrum VaMs.102 conserved hypothetical protein, mRNA	-	-	0.0 tr|G2XH82|G2XH82_VERDV Putative uncharacterized protein OS=Verticillium dahliae (strain VdLs.17 / ATCC MYA-4575 / FGSC 10137) GN=VDAG_09514 PE=4 SV=1	-	-
c15511_g1	233.569	99.4246	367.714	3.69843	1.88691	1.01e-12	6.65e-12	5.68	21.1	-	-	-	-	-	-	-	-	-	-	-
c15522_g1	1809.42	2506.72	1112.11	0.443651	-1.1725	6.4e-169	1.96e-167	168.77	75.2	-	-	-	-	-	-	-	-	-	-	-
c1553_g1	22.597	34.7305	10.4634	0.301275	-1.73085	1.59e-05	5.5e-05	3.72	1.13	-	-	-	-	7e-39 gb|EGY20532.1| hypothetical protein VDAG_10161 [Verticillium dahliae VdLs.17]	-	-	-	8e-39 tr|G2XJ29|G2XJ29_VERDV Putative uncharacterized protein OS=Verticillium dahliae (strain VdLs.17 / ATCC MYA-4575 / FGSC 10137) GN=VDAG_10161 PE=4 SV=1	-	-
c15537_g1	3417.05	4837.07	1997.02	0.412857	-1.27629	0	0	170.36	70.49	-	-	4e-14 gnl|CDD|216722 pfam01822, WSC, WSC domain. This domain may be involved in carbohydrate binding.	1e-07 gnl|CDD|232087 KOG4157, KOG4157, KOG4157, beta-1,6-N-acetylglucosaminyltransferase, contains WSC domain [Carbohydrate transport and metabolism, Posttranslational modification, protein turnover, chaperones].	0.0 gb|EGY23597.1| hypothetical protein VDAG_05035 [Verticillium dahliae VdLs.17]	0.0 ref|XM_003002889.1| Verticillium albo-atrum VaMs.102 conserved hypothetical protein, mRNA	9e-15 gnl|CDD|216722 pfam01822, WSC, WSC domain. This domain may be involved in carbohydrate binding.	-	0.0 tr|G2X4F3|G2X4F3_VERDV Putative uncharacterized protein OS=Verticillium dahliae (strain VdLs.17 / ATCC MYA-4575 / FGSC 10137) GN=VDAG_05035 PE=4 SV=1	-	-
c1554_g1	396.206	588.375	204.037	0.34678	-1.52791	1.2e-60	2.39e-59	21.85	7.59	VDBG_02116	hypothetical protein	1e-17 gnl|CDD|221328 pfam11937, DUF3455, Protein of unknown function (DUF3455). This family of proteins are functionally uncharacterized. This protein is found in bacteria and eukaryotes. Proteins in this family are typically between 174 to 251 amino acids in length.	-	2e-104 ref|XP_003007928.1| conserved hypothetical protein [Verticillium alfalfae VaMs.102] gb|EEY16007.1| conserved hypothetical protein [Verticillium alfalfae VaMs.102]	0.0 ref|XM_003007882.1| Verticillium albo-atrum VaMs.102 conserved hypothetical protein, mRNA	3e-18 gnl|CDD|221328 pfam11937, DUF3455, Protein of unknown function (DUF3455). This family of proteins are functionally uncharacterized. This protein is found in bacteria and eukaryotes. Proteins in this family are typically between 174 to 251 amino acids in length.	-	2e-104 tr|C9S9E4|C9S9E4_VERA1 Putative uncharacterized protein OS=Verticillium albo-atrum (strain VaMs.102 / ATCC MYA-4576 / FGSC 10136) GN=VDBG_02116 PE=4 SV=1	-	-
c15547_g1	647.079	907.76	386.399	0.425662	-1.23222	2.64e-67	5.57e-66	39.45	16.84	-	-	-	-	0.0 gb|EGY18432.1| hypothetical protein VDAG_08766 [Verticillium dahliae VdLs.17]	0.0 ref|XM_003004799.1| Verticillium albo-atrum VaMs.102 conserved hypothetical protein, mRNA	-	-	0.0 tr|G2XF34|G2XF34_VERDV Putative uncharacterized protein OS=Verticillium dahliae (strain VdLs.17 / ATCC MYA-4575 / FGSC 10137) GN=VDAG_08766 PE=4 SV=1	GO:0005622,intracellular;GO:0008270,zinc ion binding	-
c15557_g1	271.868	379.312	164.425	0.433483	-1.20595	3.43e-28	4.2e-27	9.53	4.14	-	-	-	-	0.0 gb|EGY16252.1| hypothetical protein VDAG_07416 [Verticillium dahliae VdLs.17]	0.0 ref|XM_003000718.1| Verticillium albo-atrum VaMs.102 conserved hypothetical protein, mRNA	-	-	0.0 tr|G2XAT5|G2XAT5_VERDV Putative uncharacterized protein OS=Verticillium dahliae (strain VdLs.17 / ATCC MYA-4575 / FGSC 10137) GN=VDAG_07416 PE=4 SV=1	-	-
c15588_g1	1371.94	871.667	1872.2	2.14784	1.10289	0	0	29.08	62.6	-	-	3e-15 gnl|CDD|203011 pfam04433, SWIRM, SWIRM domain. This SWIRM domain is a small alpha-helical domain of about 85 amino acid residues found in chromosomal proteins. It contains a helix-turn helix motif and binds to DNA.	-	0.0 gb|EGY19637.1| SWIRM domain-containing protein [Verticillium dahliae VdLs.17]	0.0 ref|XM_003007670.1| Verticillium albo-atrum VaMs.102 SWIRM domain-containing protein, mRNA	6e-16 gnl|CDD|203011 pfam04433, SWIRM, SWIRM domain. This SWIRM domain is a small alpha-helical domain of about 85 amino acid residues found in chromosomal proteins. It contains a helix-turn helix motif and binds to DNA.	5e-25 sp|P28003|FUN19_YEAST SWIRM domain-containing protein FUN19 OS=Saccharomyces cerevisiae (strain ATCC 204508 / S288c) GN=FUN19 PE=1 SV=3	0.0 tr|G2WVL7|G2WVL7_VERDV SWIRM domain-containing protein OS=Verticillium dahliae (strain VdLs.17 / ATCC MYA-4575 / FGSC 10137) GN=VDAG_01653 PE=4 SV=1	GO:0003677,DNA binding	-
c15593_g1	45.8485	17.7057	73.9913	4.17894	2.06314	5.85e-13	3.92e-12	1.92	8.06	VDBG_00340	hypothetical protein	-	-	4e-106 ref|XP_003008659.1| conserved hypothetical protein [Verticillium alfalfae VaMs.102] gb|EEY14233.1| conserved hypothetical protein [Verticillium alfalfae VaMs.102]	0.0 ref|XM_003008613.1| Verticillium albo-atrum VaMs.102 conserved hypothetical protein, mRNA	-	-	5e-106 tr|C9S5I6|C9S5I6_VERA1 Putative uncharacterized protein OS=Verticillium albo-atrum (strain VaMs.102 / ATCC MYA-4576 / FGSC 10136) GN=VDBG_00340 PE=4 SV=1	-	-
c15603_g1	836.504	425.619	1247.39	2.93076	1.55128	1.88e-11	1.06e-10	28.97	85.26	-	-	-	-	2e-63 gb|EGY14075.1| hypothetical protein VDAG_00757 [Verticillium dahliae VdLs.17]	5e-120 ref|XM_003009421.1| Verticillium albo-atrum VaMs.102 conserved hypothetical protein, mRNA	-	-	2e-63 tr|G2WQW5|G2WQW5_VERDV Putative uncharacterized protein OS=Verticillium dahliae (strain VdLs.17 / ATCC MYA-4575 / FGSC 10137) GN=VDAG_00757 PE=4 SV=1	-	-
c15612_g1	4359.31	7661.82	1056.8	0.137931	-2.85798	0	0	1510.41	210.95	VDBG_03945	hypothetical protein	-	-	3e-69 ref|XP_003005992.1| conserved hypothetical protein [Verticillium alfalfae VaMs.102] gb|EEY17836.1| conserved hypothetical protein [Verticillium alfalfae VaMs.102] gb|EGY17490.1| hypothetical protein VDAG_01172 [Verticillium dahliae VdLs.17]	3e-149 ref|XM_003005946.1| Verticillium albo-atrum VaMs.102 conserved hypothetical protein, mRNA	-	-	4e-69 tr|G2WTP9|G2WTP9_VERDV Putative uncharacterized protein OS=Verticillium dahliae (strain VdLs.17 / ATCC MYA-4575 / FGSC 10137) GN=VDAG_01172 PE=4 SV=1	-	-
c15635_g1	1457.31	2370.53	544.098	0.229526	-2.12327	0	0	108.53	24.98	-	-	4e-92 gnl|CDD|193498 cd03876, M28_SGAP_like, M28 Zn-peptidase Streptomyces griseus Aminopeptidase and similar proteins. Peptidase family M28; Streptomyces griseus Aminopeptidase (SGAP, Leucine aminopeptidase (LAP), aminopeptidase S, Mername-AA022 peptidase) subfamily. SGAP is a di-zinc exopeptidase with high preference towards large hydrophobic amino-terminal residues, with Leu being the most eff…	1e-26 gnl|CDD|230134 KOG2195, KOG2195, KOG2195, Transferrin receptor and related proteins containing the protease-associated (PA) domain [Posttranslational modification, protein turnover, chaperones, Inorganic ion transport and metabolism, General function prediction only].	0.0 gb|EGY16816.1| aminopeptidase Y [Verticillium dahliae VdLs.17]	0.0 ref|XM_003009552.1| Verticillium albo-atrum VaMs.102 aminopeptidase Y, mRNA	3e-43 gnl|CDD|218057 pfam04389, Peptidase_M28, Peptidase family M28.	1e-62 sp|C5FTZ6|LAP2_ARTOC Leucine aminopeptidase 2 OS=Arthroderma otae (strain ATCC MYA-4605 / CBS 113480) GN=LAP2 PE=3 SV=1	0.0 tr|G2XCU8|G2XCU8_VERDV Aminopeptidase Y OS=Verticillium dahliae (strain VdLs.17 / ATCC MYA-4575 / FGSC 10137) GN=VDAG_07980 PE=4 SV=1	GO:0016020,membrane;GO:0006508,proteolysis;GO:0009405,pathogenesis;GO:0008237,metallopeptidase activity;GO:0004177,aminopeptidase activity;GO:0005576,extracellular region;GO:0004571,mannosyl-oligosaccharide 1,2-alpha-mannosidase activity;GO:0005509,calcium ion binding	-
c15637_g1	24.3326	37.4545	11.2108	0.299318	-1.74025	6.71e-06	2.41e-05	2.22	0.67	-	-	1e-56 gnl|CDD|185724 cd08983, GH43_4, Glycosyl hydrolase family 43. This glycosyl hydrolase family 43 (GH43) includes enzymes with beta-1,4-xylosidase (xylan 1,4-beta-xylosidase; EC 3.2.1.37), beta-1,3-xylosidase (EC 3.2.1.-), alpha-L-arabinofuranosidase (EC 3.2.1.55), arabinanase (EC 3.2.1.99), xylanase (EC 3.2.1.8), endo-alpha-L-arabinanase and galactan 1,3-beta-galactosidase (EC 3.2.1.145) act…	-	0.0 gb|EGY14345.1| endo-1,4-beta-xylanase [Verticillium dahliae VdLs.17]	4e-126 ref|XM_003001629.1| Verticillium albo-atrum VaMs.102 arabinosidase, mRNA	-	-	0.0 tr|G2X5K4|G2X5K4_VERDV Endo-1,4-beta-xylanase OS=Verticillium dahliae (strain VdLs.17 / ATCC MYA-4575 / FGSC 10137) GN=VDAG_05509 PE=4 SV=1	GO:0045493,xylan catabolic process	-
c15639_g1	20.8357	9.53386	32.1376	3.37089	1.75313	2.26e-05	7.7e-05	0.54	1.83	-	-	-	-	-	-	-	-	-	-	-
c15642_g1	640.024	1037.15	242.901	0.234201	-2.09418	7.73e-162	2.33e-160	46.38	10.89	-	-	5e-13 gnl|CDD|173623 cd00180, PKc, Catalytic domain of Protein Kinases. Protein Kinases (PKs), catalytic (c) domain. PKs catalyze the transfer of the gamma-phosphoryl group from ATP to serine/threonine or tyrosine residues on protein substrates. The PK family is part of a larger superfamily that includes the catalytic domains of RIO kinases, aminoglycoside phosphotransferase, choline kinase, phos…	1e-07 gnl|CDD|228141 KOG0192, KOG0192, KOG0192, Tyrosine kinase specific for activated (GTP-bound) p21cdc42Hs [Signal transduction mechanisms].	0.0 gb|EGY19064.1| hypothetical protein VDAG_09398 [Verticillium dahliae VdLs.17]	0.0 ref|XM_003002171.1| Verticillium albo-atrum VaMs.102 conserved hypothetical protein, mRNA	2e-08 gnl|CDD|215690 pfam00069, Pkinase, Protein kinase domain.	-	0.0 tr|G2XGW6|G2XGW6_VERDV Putative uncharacterized protein OS=Verticillium dahliae (strain VdLs.17 / ATCC MYA-4575 / FGSC 10137) GN=VDAG_09398 PE=4 SV=1	GO:0004672,protein kinase activity;GO:0005524,ATP binding	-
c1565_g1	20.2135	29.9636	10.4634	0.349205	-1.51786	0.000269472	0.000820363	2.23	0.78	-	-	-	-	-	-	-	-	-	-	-
c15653_g1	241.8	137.56	346.04	2.51556	1.33088	5.7e-13	3.83e-12	13.68	34.64	-	-	-	-	3e-124 gb|EGY21831.1| hypothetical protein VDAG_03271 [Verticillium dahliae VdLs.17]	0.0 ref|XM_003003625.1| Verticillium albo-atrum VaMs.102 conserved hypothetical protein, mRNA	-	-	4e-124 tr|G2WZ29|G2WZ29_VERDV Putative uncharacterized protein OS=Verticillium dahliae (strain VdLs.17 / ATCC MYA-4575 / FGSC 10137) GN=VDAG_03271 PE=4 SV=1	-	-
c15660_g1	1140.25	219.96	2060.55	9.36783	3.22771	3.65e-12	2.28e-11	10.17	95.57	-	-	6e-143 gnl|CDD|237337 PRK13289, PRK13289, bifunctional nitric oxide dioxygenase/dihydropteridine reductase 2; Provisional.	1e-64 gnl|CDD|231316 KOG3378, KOG3378, KOG3378, Hemoglobin-like flavoprotein [Energy production and conversion].	0.0 gb|EGY15329.1| hemoglobin [Verticillium dahliae VdLs.17]	7e-150 ref|XM_002999811.1| Verticillium albo-atrum VaMs.102 bacterial hemoglobin, mRNA	6e-07 gnl|CDD|215673 pfam00042, Globin, Globin.	2e-83 sp|Q9RYR5|HMP_DEIRA Flavohemoprotein OS=Deinococcus radiodurans (strain ATCC 13939 / DSM 20539 / JCM 16871 / LMG 4051 / NBRC 15346 / NCIMB 9279 / R1 / VKM B-1422) GN=hmp PE=3 SV=1	0.0 tr|G2X8P2|G2X8P2_VERDV Hemoglobin OS=Verticillium dahliae (strain VdLs.17 / ATCC MYA-4575 / FGSC 10137) GN=VDAG_06183 PE=3 SV=1	GO:0009055,electron carrier activity;GO:0020037,heme binding;GO:0051409,response to nitrosative stress;GO:0005506,iron ion binding;GO:0019825,oxygen binding;GO:0016491,oxidoreductase activity;GO:0071949,FAD binding;GO:0008941,nitric oxide dioxygenase activity;GO:0005344,oxygen transporter activity	K05916-ko05132,Salmonella infection
c15675_g1	270.29	365.692	174.889	0.47824	-1.06419	1.38e-22	1.44e-21	18.25	8.75	-	-	-	-	0.0 gb|EGY14076.1| hypothetical protein VDAG_00758 [Verticillium dahliae VdLs.17]	0.0 ref|XM_003009423.1| Verticillium albo-atrum VaMs.102 conserved hypothetical protein, mRNA	-	-	0.0 tr|G2WQW6|G2WQW6_VERDV Putative uncharacterized protein OS=Verticillium dahliae (strain VdLs.17 / ATCC MYA-4575 / FGSC 10137) GN=VDAG_00758 PE=4 SV=1	-	-
c15682_g1	212.249	291.464	133.035	0.456437	-1.13151	4.67e-20	4.47e-19	7.53	3.44	-	-	1e-72 gnl|CDD|223540 COG0464, SpoVK, ATPases of the AAA+ class [Posttranslational modification, protein turnover, chaperones].	2e-113 gnl|CDD|228682 KOG0735, KOG0735, KOG0735, AAA+-type ATPase [Posttranslational modification, protein turnover, chaperones].	0.0 gb|EGY22801.1| peroxisome biosynthesis protein PAS1 [Verticillium dahliae VdLs.17]	0.0 ref|XM_003005045.1| Verticillium albo-atrum VaMs.102 peroxisome biosynthesis protein PAS1, mRNA	1e-42 gnl|CDD|215649 pfam00004, AAA, ATPase family associated with various cellular activities (AAA). AAA family proteins often perform chaperone-like functions that assist in the assembly, operation, or disassembly of protein complexes.	2e-111 sp|P46463|PEX1_PICPA Peroxisome biosynthesis protein PAS1 OS=Komagataella pastoris GN=PEX1 PE=3 SV=1	0.0 tr|G2X1R5|G2X1R5_VERDV Peroxisome biosynthesis protein PAS1 OS=Verticillium dahliae (strain VdLs.17 / ATCC MYA-4575 / FGSC 10137) GN=VDAG_04239 PE=4 SV=1	GO:0005778,peroxisomal membrane;GO:0005524,ATP binding;GO:0006625,protein targeting to peroxisome;GO:0042623,ATPase activity, coupled	K13338-ko04146,Peroxisome
c15683_g1	118.407	162.076	74.7387	0.461135	-1.11674	1.38e-11	7.97e-11	24	11.17	-	-	-	-	3e-78 gb|EGY18060.1| hypercellular protein A [Verticillium dahliae VdLs.17]	0.0 ref|XM_003008376.1| Verticillium albo-atrum VaMs.102 hypercellular protein, mRNA	-	-	3e-78 tr|G2XE12|G2XE12_VERDV Hypercellular protein A OS=Verticillium dahliae (strain VdLs.17 / ATCC MYA-4575 / FGSC 10137) GN=VDAG_08394 PE=4 SV=1	-	-
c15687_g1	186.962	250.604	123.319	0.492086	-1.02302	4.7e-15	3.6e-14	14.33	7.08	VDBG_08555	hypothetical protein	8e-08 gnl|CDD|204455 pfam10346, Con-6, Conidiation protein 6. Con-6 is the conserved N-terminal region of a family of small proteins found in fungi. It is expressed at approximately 6 hours after the induction of development and is induced just prior to major constriction-chain growth.	-	5e-89 ref|XP_003001510.1| conserved hypothetical protein [Verticillium alfalfae VaMs.102] gb|EEY22445.1| conserved hypothetical protein [Verticillium alfalfae VaMs.102]	0.0 ref|XM_003001465.1| Verticillium albo-atrum VaMs.102 conserved hypothetical protein, mRNA	2e-08 gnl|CDD|204455 pfam10346, Con-6, Conidiation protein 6. Con-6 is the conserved N-terminal region of a family of small proteins found in fungi. It is expressed at approximately 6 hours after the induction of development and is induced just prior to major constriction-chain growth.	-	6e-89 tr|C9SUD4|C9SUD4_VERA1 Putative uncharacterized protein OS=Verticillium albo-atrum (strain VaMs.102 / ATCC MYA-4576 / FGSC 10136) GN=VDBG_08555 PE=4 SV=1	GO:0016747,transferase activity, transferring acyl groups other than amino-acyl groups	-
c15693_g1	3729.48	5488.1	1970.86	0.359115	-1.47748	0	0	665.83	240.95	-	-	1e-39 gnl|CDD|238339 cd00606, fungal_RNase, fungal type ribonuclease. Ribonucleases (RNAses) cleave phosphodiester bonds in RNA and are essential for both non-specific RNA degradation and for numerous forms of RNA processing. The members of this CD belong to the superfamily of microbial ribonucleases which are predominantly guanyl specific nucleases. Guanyl specific RNAses are endonucleases which…	-	4e-51 emb|CCF36220.1| ribonuclease [Colletotrichum higginsianum]	4e-114 ref|XM_003001545.1| Verticillium albo-atrum VaMs.102 guanyl-specific ribonuclease F1, mRNA	8e-20 gnl|CDD|215987 pfam00545, Ribonuclease, ribonuclease. This enzyme hydrolyses RNA and oligoribonucleotides.	6e-42 sp|P10282|RNF1_GIBFU Guanyl-specific ribonuclease F1 OS=Gibberella fujikuroi PE=1 SV=4	5e-51 tr|H1V7L8|H1V7L8_COLHI Ribonuclease OS=Colletotrichum higginsianum (strain IMI 349063) GN=CH063_07840 PE=4 SV=1	GO:0004521,endoribonuclease activity;GO:0003723,RNA binding;GO:0046589,ribonuclease T1 activity;GO:0090305,nucleic acid phosphodiester bond hydrolysis	-
c15695_g1	3150.57	4837.75	1463.38	0.302492	-1.72503	0	0	138.01	41.82	-	-	2e-23 gnl|CDD|188934 cd09535, SAM_BOI-like_fungal, SAM domain of BOI-like fungal subfamily. SAM (sterile alpha motif) domain of BOI-like fungal subfamily is a potential protein-protein interaction domain. Proteins of this subfamily are apparently scaffold proteins, since most contain SH3 and PH domains, which are also protein-protein interaction domains, in addition to SAM domain. BOI-like protei…	-	0.0 gb|EGY22737.1| SAM and PH domain-containing protein [Verticillium dahliae VdLs.17]	0.0 ref|XM_003004977.1| Verticillium albo-atrum VaMs.102 SAM and PH domain-containing protein, mRNA	-	4e-08 sp|O74653|POB1_SCHPO Protein pob1 OS=Schizosaccharomyces pombe (strain 972 / ATCC 24843) GN=pob1 PE=1 SV=1	0.0 tr|G2X2Y1|G2X2Y1_VERDV SAM and PH domain-containing protein OS=Verticillium dahliae (strain VdLs.17 / ATCC MYA-4575 / FGSC 10137) GN=VDAG_04175 PE=4 SV=1	GO:0016020,membrane;GO:0031097,medial cortex;GO:0000920,cytokinetic cell separation;GO:0008360,regulation of cell shape;GO:0051285,cell cortex of cell tip;GO:0005543,phospholipid binding	-
c157_g1	796.68	268.991	1324.37	4.92347	2.29968	8.52e-12	5.06e-11	5.07	25.02	-	-	2e-26 gnl|CDD|217926 pfam04146, YTH, YT521-B-like domain. A protein of the YTH family has been shown to selectively remove transcripts of meiosis-specific genes expressed in mitotic cells. It has been speculated that in higher eukaryotic YTH-family members may be involved in similar mechanisms to suppress gene regulation during gametogenesis or general silencing. The rat protein YT521-B is a tyro…	9e-16 gnl|CDD|229841 KOG1902, KOG1902, KOG1902, Putative signal transduction protein involved in RNA splicing [Signal transduction mechanisms, RNA processing and modification].	0.0 emb|CCF37288.1| hypothetical protein CH063_08662 [Colletotrichum higginsianum]	0.0 ref|XM_003003986.1| Verticillium albo-atrum VaMs.102 conserved hypothetical protein, mRNA	3e-27 gnl|CDD|217926 pfam04146, YTH, YT521-B-like domain. A protein of the YTH family has been shown to selectively remove transcripts of meiosis-specific genes expressed in mitotic cells. It has been speculated that in higher eukaryotic YTH-family members may be involved in similar mechanisms to suppress gene regulation during gametogenesis or general silencing. The rat protein YT521-B is a tyro…	2e-11 sp|Q0DA50|C3H45_ORYSJ Zinc finger CCCH domain-containing protein 45 OS=Oryza sativa subsp. japonica GN=Os06g0677700 PE=2 SV=1	0.0 tr|H1VAN5|H1VAN5_COLHI Uncharacterized protein OS=Colletotrichum higginsianum (strain IMI 349063) GN=CH063_08662 PE=4 SV=1	GO:0004519,endonuclease activity;GO:0003723,RNA binding;GO:0003677,DNA binding;GO:0000166,nucleotide binding;GO:0008270,zinc ion binding;GO:0005634,nucleus;GO:0003676,nucleic acid binding;GO:0046872,metal ion binding	-
c15701_g1	59.1185	6.12891	112.108	18.2917	4.19311	0	0	0.97	18	-	-	2e-38 gnl|CDD|233851 TIGR02403, trehalose_treC, alpha,alpha-phosphotrehalase. Trehalose is a glucose disaccharide that serves in many biological systems as a compatible solute for protection against hyperosmotic and thermal stress. This family describes trehalose-6-phosphate hydrolase, product of the treC (or treA) gene, which is often found together with a trehalose uptake transporter and a treh…	1e-15 gnl|CDD|228420 KOG0471, KOG0471, KOG0471, Alpha-amylase [Carbohydrate transport and metabolism].	2e-145 gb|EGY14214.1| alpha-glucosidase [Verticillium dahliae VdLs.17]	0.0 ref|XM_002999738.1| Verticillium albo-atrum VaMs.102 alpha-glucosidase, mRNA	-	2e-35 sp|Q02751|MALT_CANAX Alpha-glucosidase OS=Candida albicans GN=MAL2 PE=1 SV=4	2e-145 tr|G2X573|G2X573_VERDV Alpha-glucosidase OS=Verticillium dahliae (strain VdLs.17 / ATCC MYA-4575 / FGSC 10137) GN=VDAG_05378 PE=4 SV=1	GO:0000023,maltose metabolic process;GO:0032450,maltose alpha-glucosidase activity;GO:0003824,catalytic activity;GO:0043169,cation binding;GO:0005975,carbohydrate metabolic process	-
c15717_g1	10.3144	18.3867	2.24216	0.121944	-3.0357	1.45e-05	5.05e-05	3.92	0.48	COX2	cytochrome c oxidase subunit II	6e-113 gnl|CDD|177178 MTH00117, COX2, cytochrome c oxidase subunit II; Provisional.	2e-83 gnl|CDD|232692 KOG4767, KOG4767, KOG4767, Cytochrome c oxidase, subunit II, and related proteins [Energy production and conversion].	3e-98 ref|NP_861579.1| cytochrome c oxidase subunit II [Andrias davidianus] emb|CAD37337.1| cytochrome oxidase subunit II [Andrias davidianus]	0.0 emb|AJ492192.1| Andrias davidianus complete mitochondrial genome	1e-63 gnl|CDD|201014 pfam00116, COX2, Cytochrome C oxidase subunit II, periplasmic domain.	9e-86 sp|P00407|COX2_XENLA Cytochrome c oxidase subunit 2 OS=Xenopus laevis GN=mt-co2 PE=3 SV=1	3e-98 tr|Q7Y8V5|Q7Y8V5_ANDDA Cytochrome c oxidase subunit 2 OS=Andrias davidianus GN=coii PE=3 SV=1	GO:0022904,respiratory electron transport chain;GO:0005507,copper ion binding;GO:0009055,electron carrier activity;GO:0020037,heme binding;GO:0004129,cytochrome-c oxidase activity;GO:0005743,mitochondrial inner membrane;GO:0016021,integral to membrane;GO:0070469,respiratory chain	-
c1572_g1	210.539	311.213	109.866	0.353025	-1.50216	4.28e-32	5.74e-31	15.5	5.48	VDBG_01676	hypothetical protein	-	-	9e-96 ref|XP_003007488.1| conserved hypothetical protein [Verticillium alfalfae VaMs.102] gb|EEY15567.1| conserved hypothetical protein [Verticillium alfalfae VaMs.102]	0.0 ref|XM_003007442.1| Verticillium albo-atrum VaMs.102 conserved hypothetical protein, mRNA	-	-	1e-95 tr|C9SAZ3|C9SAZ3_VERA1 Putative uncharacterized protein OS=Verticillium albo-atrum (strain VaMs.102 / ATCC MYA-4576 / FGSC 10136) GN=VDBG_01676 PE=4 SV=1	-	-
c15729_g1	3488.45	1547.89	5429.02	3.50737	1.81039	4.62e-12	2.85e-11	54.4	191.23	-	-	3e-87 gnl|CDD|198413 cd10431, GHITM, Growth-hormone inducible transmembrane protein. GHITM appears to be ubiquitiously expressed in mammalian cells and expression has also been observed in various cancer cell lines. A cytoprotective function has been suggested. It is closely related to the BAX inhibitor (BI)-1 like family of small transmembrane proteins, which have been shown to have an antiapopt…	6e-28 gnl|CDD|229571 KOG1630, KOG1630, KOG1630, Growth hormone-induced protein and related proteins [Signal transduction mechanisms].	0.0 gb|EGY15402.1| growth hormone-inducible transmembrane protein [Verticillium dahliae VdLs.17]	0.0 ref|XM_002999876.1| Verticillium albo-atrum VaMs.102 growth hormone-inducible transmembrane protein, mRNA	7e-33 gnl|CDD|216251 pfam01027, Bax1-I, Inhibitor of apoptosis-promoting Bax1. Programmed cell-death involves a set of Bcl-2 family proteins, some of which inhibit apoptosis (Bcl-2 and Bcl-XL) and some of which promote it (Bax and Bak). Human Bax inhibitor, BI-1, is an evolutionarily conserved integral membrane protein containing multiple membrane-spanning segments predominantly localised to intr…	1e-22 sp|Q91VC9|GHITM_MOUSE Growth hormone-inducible transmembrane protein OS=Mus musculus GN=Ghitm PE=2 SV=1	0.0 tr|G2X7Y9|G2X7Y9_VERDV Growth hormone-inducible transmembrane protein OS=Verticillium dahliae (strain VdLs.17 / ATCC MYA-4575 / FGSC 10137) GN=VDAG_06256 PE=4 SV=1	GO:0006915,apoptotic process;GO:0005743,mitochondrial inner membrane;GO:0016021,integral to membrane;GO:0005739,mitochondrion	-
c15735_g1	231.295	130.75	331.84	2.53797	1.34367	4.8e-13	3.25e-12	5.1	12.98	-	-	-	-	0.0 gb|EGY15024.1| hypothetical protein VDAG_06514 [Verticillium dahliae VdLs.17]	0.0 ref|XM_003001012.1| Verticillium albo-atrum VaMs.102 conserved hypothetical protein, mRNA	-	-	0.0 tr|G2X7Q6|G2X7Q6_VERDV Putative uncharacterized protein OS=Verticillium dahliae (strain VdLs.17 / ATCC MYA-4575 / FGSC 10137) GN=VDAG_06514 PE=4 SV=1	GO:0008270,zinc ion binding	-
c1574_g1	26.682	12.2578	41.1063	3.35347	1.74566	1.68e-06	6.36e-06	1.21	4.07	-	-	-	-	5e-43 gb|EGY16518.1| hypothetical protein VDAG_07682 [Verticillium dahliae VdLs.17]	0.0 ref|XM_003004587.1| Verticillium albo-atrum VaMs.102 predicted protein, mRNA	-	-	6e-43 tr|G2XBP6|G2XBP6_VERDV Putative uncharacterized protein OS=Verticillium dahliae (strain VdLs.17 / ATCC MYA-4575 / FGSC 10137) GN=VDAG_07682 PE=4 SV=1	-	-
c15742_g1	509.222	700.058	318.387	0.454801	-1.13669	3.06e-46	5.33e-45	21.04	9.59	VDBG_08552	start control protein cdc10	1e-10 gnl|CDD|238125 cd00204, ANK, ankyrin repeats; ankyrin repeats mediate protein-protein interactions in very diverse families of proteins. The number of ANK repeats in a protein can range from 2 to over 20 (ankyrins, for example). ANK repeats may occur in combinations with other types of domains. The structural repeat unit contains two antiparallel helices and a beta-hairpin, repeats are stac…	5e-09 gnl|CDD|228457 KOG0509, KOG0509, KOG0509, Ankyrin repeat and DHHC-type Zn-finger domain containing proteins [General function prediction only].	0.0 ref|XP_003001507.1| start control protein cdc10 [Verticillium alfalfae VaMs.102] gb|EEY22442.1| start control protein cdc10 [Verticillium alfalfae VaMs.102]	0.0 ref|XM_003001461.1| Verticillium albo-atrum VaMs.102 start control protein cdc10, mRNA	8e-09 gnl|CDD|218053 pfam04383, KilA-N, KilA-N domain. The amino-terminal module of the D6R/N1R proteins defines a novel, conserved DNA-binding domain (the KilA-N domain) that is found in a wide range of proteins of large bacterial and eukaryotic DNA viruses. The KilA-N domain family also includes the previously defined APSES domain. The KilA-N and APSES domains may also share a common fold with …	2e-79 sp|P01129|CDC10_SCHPO Start control protein cdc10 OS=Schizosaccharomyces pombe (strain 972 / ATCC 24843) GN=cdc10 PE=1 SV=1	0.0 tr|C9SUD1|C9SUD1_VERA1 Start control protein cdc10 OS=Verticillium albo-atrum (strain VaMs.102 / ATCC MYA-4576 / FGSC 10136) GN=VDBG_08552 PE=4 SV=1	GO:0071931,positive regulation of transcription involved in G1/S phase of mitotic cell cycle;GO:0051039,positive regulation of transcription during meiosis;GO:0005737,cytoplasm;GO:0003700,sequence-specific DNA binding transcription factor activity;GO:0045897,positive regulation of transcription during mitosis;GO:0007068,negative regulation of transcription during mitosis;GO:0009303,rRNA transcrip…	-
c15747_g1	187.552	261.5	113.603	0.434427	-1.20281	7.62e-20	7.25e-19	19	8.29	-	-	4e-69 gnl|CDD|233428 TIGR01473, cyoE_ctaB, protoheme IX farnesyltransferase. This model describes protoheme IX farnesyltransferase, also called heme O synthase, an enzyme that creates an intermediate in the biosynthesis of heme A. Prior to the description of its enzymatic function, this protein was often called a cytochrome o ubiquinol oxidase assembly factor [Biosynthesis of cofactors, prostheti…	7e-95 gnl|CDD|229322 KOG1380, KOG1380, KOG1380, Heme A farnesyltransferase [Coenzyme transport and metabolism].	8e-138 gb|EGX89938.1| protoheme IX farnesyltransferase [Cordyceps militaris CM01]	0.0 ref|XM_003654480.1| Thielavia terrestris NRRL 8126 hypothetical protein (THITE_2117623) mRNA, complete cds	6e-18 gnl|CDD|216260 pfam01040, UbiA, UbiA prenyltransferase family.	3e-134 sp|P0C150|COX10_MAGO7 Protoheme IX farnesyltransferase, mitochondrial OS=Magnaporthe oryzae (strain 70-15 / ATCC MYA-4617 / FGSC 8958) GN=COX10 PE=3 SV=1	1e-137 tr|G3JNB9|G3JNB9_CORMM Protoheme IX farnesyltransferase, mitochondrial OS=Cordyceps militaris (strain CM01) GN=CCM_08191 PE=3 SV=1	GO:0008495,protoheme IX farnesyltransferase activity;GO:0048034,heme O biosynthetic process;GO:0016021,integral to membrane;GO:0031966,mitochondrial membrane	K02257-ko00190,Oxidative phosphorylation;ko00860,Porphyrin and chlorophyll metabolism
c1577_g1	19.7479	8.85287	30.6429	3.46135	1.79133	2.68e-05	9.1e-05	0.88	3.06	-	-	-	-	1e-34 gb|EGY15989.1| hypothetical protein VDAG_07153 [Verticillium dahliae VdLs.17]	-	-	-	2e-34 tr|G2X9V8|G2X9V8_VERDV Putative uncharacterized protein OS=Verticillium dahliae (strain VdLs.17 / ATCC MYA-4575 / FGSC 10137) GN=VDAG_07153 PE=4 SV=1	-	-
c1580_g1	155.513	228.813	82.2126	0.359301	-1.47674	1.87e-23	2.01e-22	21.24	7.68	-	-	-	-	1e-163 gb|EGY23818.1| hypothetical protein VDAG_05256 [Verticillium dahliae VdLs.17]	0.0 ref|XM_003000458.1| Verticillium albo-atrum VaMs.102 hypothetical protein, mRNA	-	-	2e-163 tr|G2X524|G2X524_VERDV Putative uncharacterized protein OS=Verticillium dahliae (strain VdLs.17 / ATCC MYA-4575 / FGSC 10137) GN=VDAG_05256 PE=4 SV=1	GO:0000981,sequence-specific DNA binding RNA polymerase II transcription factor activity;GO:0006357,regulation of transcription from RNA polymerase II promoter;GO:0008270,zinc ion binding;GO:0005634,nucleus;GO:0006366,transcription from RNA polymerase II promoter	-
c15803_g1	227.515	93.2957	361.735	3.8773	1.95505	1.13e-12	7.39e-12	9.33	36.39	-	-	6e-91 gnl|CDD|215289 PLN02528, PLN02528, 2-oxoisovalerate dehydrogenase E2 component.	3e-91 gnl|CDD|228506 KOG0558, KOG0558, KOG0558, Dihydrolipoamide transacylase (alpha-keto acid dehydrogenase E2 subunit) [Energy production and conversion].	1e-178 gb|EGY22923.1| dihydrolipoamide transacylase [Verticillium dahliae VdLs.17]	0.0 ref|XM_003005168.1| Verticillium albo-atrum VaMs.102 dihydrolipoamide branched chain transacylase E2, mRNA	2e-72 gnl|CDD|215782 pfam00198, 2-oxoacid_dh, 2-oxoacid dehydrogenases acyltransferase (catalytic domain). These proteins contain one to three copies of a lipoyl binding domain followed by the catalytic domain.	6e-65 sp|Q23571|ODB2_CAEEL Lipoamide acyltransferase component of branched-chain alpha-keto acid dehydrogenase complex, mitochondrial OS=Caenorhabditis elegans GN=ZK669.4 PE=3 SV=1	1e-178 tr|G2X237|G2X237_VERDV Dihydrolipoamide transacylase OS=Verticillium dahliae (strain VdLs.17 / ATCC MYA-4575 / FGSC 10137) GN=VDAG_04361 PE=3 SV=1	GO:0046949,fatty-acyl-CoA biosynthetic process;GO:0043754,dihydrolipoyllysine-residue (2-methylpropanoyl)transferase activity;GO:0009792,embryo development ending in birth or egg hatching;GO:0048037,cofactor binding	K09699-ko00280,Valine, leucine and isoleucine degradation
c15805_g1	957.927	341.857	1574	4.60425	2.20297	7.85e-12	4.69e-11	16.19	74.78	-	-	0.0 gnl|CDD|233233 TIGR01015, hmgA, homogentisate 1,2-dioxygenase. Missing in human disease alkaptonuria [Energy metabolism, Amino acids and amines].	4e-175 gnl|CDD|229359 KOG1417, KOG1417, KOG1417, Homogentisate 1,2-dioxygenase [Amino acid transport and metabolism].	0.0 gb|EGY16250.1| homogentisate 1,2-dioxygenase [Verticillium dahliae VdLs.17]	0.0 ref|XM_003000716.1| Verticillium albo-atrum VaMs.102 homogentisate 1,2-dioxygenase, mRNA	0.0 gnl|CDD|217966 pfam04209, HgmA, homogentisate 1,2-dioxygenase. Homogentisate dioxygenase cleaves the aromatic ring during the metabolic degradation of Phe and Tyr. Homogentisate dioxygenase deficiency causes alkaptonuria. The structure of homogentisate dioxygenase shows that the enzyme forms a hexamer arrangement comprised of a dimer of trimers. The active site iron ion is coordinated near th…	0.0 sp|Q00667|HGD_EMENI Homogentisate 1,2-dioxygenase OS=Emericella nidulans (strain FGSC A4 / ATCC 38163 / CBS 112.46 / NRRL 194 / M139) GN=hmgA PE=2 SV=1	0.0 tr|G2XAT3|G2XAT3_VERDV Homogentisate 1,2-dioxygenase OS=Verticillium dahliae (strain VdLs.17 / ATCC MYA-4575 / FGSC 10137) GN=VDAG_07414 PE=4 SV=1	GO:0006559,L-phenylalanine catabolic process;GO:0006572,tyrosine catabolic process;GO:0004411,homogentisate 1,2-dioxygenase activity;GO:0006570,tyrosine metabolic process;GO:0046872,metal ion binding	K00451-ko00350,Tyrosine metabolism;ko00643,Styrene degradation
c1581_g1	86.0091	52.4362	119.582	2.28052	1.18936	7.9e-10	3.78e-09	2.76	6.3	-	-	1e-26 gnl|CDD|163622 cd07379, MPP_239FB, Homo sapiens 239FB and related proteins, metallophosphatase domain. 239FB (Fetal brain protein 239) is thought to play a role in central nervous system development, but its specific role in unknown. 239FB is expressed predominantly in human fetal brain from a gene located in the chromosome 11p13 region associated with the mental retardation component of th…	4e-34 gnl|CDD|231878 KOG3947, KOG3947, KOG3947, Phosphoesterases [General function prediction only].	0.0 gb|EGY22984.1| metallophosphoesterase domain-containing protein [Verticillium dahliae VdLs.17]	0.0 ref|XM_003005228.1| Verticillium albo-atrum VaMs.102 metallophosphoesterase domain-containing protein, mRNA	-	9e-63 sp|Q5B5P1|RGLC_EMENI Probable rhamnogalacturonate lyase C OS=Emericella nidulans (strain FGSC A4 / ATCC 38163 / CBS 112.46 / NRRL 194 / M139) GN=rglC PE=3 SV=1	0.0 tr|G2X298|G2X298_VERDV Metallophosphoesterase domain-containing protein OS=Verticillium dahliae (strain VdLs.17 / ATCC MYA-4575 / FGSC 10137) GN=VDAG_04422 PE=4 SV=1	GO:0016787,hydrolase activity;GO:0016829,lyase activity;GO:0000272,polysaccharide catabolic process;GO:0005576,extracellular region;GO:0030246,carbohydrate binding	-
c15811_g1	58.8299	81.0378	36.622	0.451912	-1.14589	1.12e-06	4.3e-06	9.83	4.48	-	-	5e-22 gnl|CDD|219780 pfam08286, Spc24, Spc24 subunit of Ndc80. Spc24 is a component of the evolutionarily conserved kinetochore-associated Ndc80 complex and is involved in chromosome segregation.	-	4e-95 gb|EGY16844.1| hypothetical protein VDAG_08008 [Verticillium dahliae VdLs.17]	0.0 ref|XM_003009525.1| Verticillium albo-atrum VaMs.102 conserved hypothetical protein, mRNA	1e-22 gnl|CDD|219780 pfam08286, Spc24, Spc24 subunit of Ndc80. Spc24 is a component of the evolutionarily conserved kinetochore-associated Ndc80 complex and is involved in chromosome segregation.	9e-63 sp|Q4IBU5|SPC24_GIBZE Probable kinetochore protein SPC24 OS=Gibberella zeae (strain PH-1 / ATCC MYA-4620 / FGSC 9075 / NRRL 31084) GN=SPC24 PE=3 SV=1	5e-95 tr|G2XCX6|G2XCX6_VERDV Putative uncharacterized protein OS=Verticillium dahliae (strain VdLs.17 / ATCC MYA-4575 / FGSC 10137) GN=VDAG_08008 PE=4 SV=1	GO:0007067,mitosis;GO:0000777,condensed chromosome kinetochore;GO:0005634,nucleus;GO:0051301,cell division	K11557
c15818_g1	115.758	162.757	68.7596	0.422469	-1.24308	1.63e-13	1.13e-12	19.07	8.12	-	-	4e-141 gnl|CDD|238662 cd01366, KISc_C_terminal, Kinesin motor domain, KIFC2/KIFC3/ncd-like carboxy-terminal kinesins. Ncd is a spindle motor protein necessary for chromosome segregation in meiosis. KIFC2/KIFC3-like kinesins have been implicated in motility of the Golgi apparatus as well as dentritic and axonal transport in neurons. This catalytic (head) domain has ATPase activity and belongs to t…	2e-114 gnl|CDD|228188 KOG0239, KOG0239, KOG0239, Kinesin (KAR3 subfamily) [Cytoskeleton].	5e-154 gb|EFY92052.1| kinesin related protein 1 [Metarhizium acridum CQMa 102]	0.0 ref|XM_003000143.1| Verticillium albo-atrum VaMs.102 carboxy-terminal kinesin 2, mRNA	8e-116 gnl|CDD|215803 pfam00225, Kinesin, Kinesin motor domain.	8e-122 sp|P28739|KLPA_EMENI Kinesin-like protein klpA OS=Emericella nidulans (strain FGSC A4 / ATCC 38163 / CBS 112.46 / NRRL 194 / M139) GN=klpA PE=2 SV=3	6e-154 tr|E9DWK2|E9DWK2_METAQ Kinesin related protein 1 OS=Metarhizium acridum (strain CQMa 102) GN=MAC_02000 PE=3 SV=1	GO:0005874,microtubule;GO:0005737,cytoplasm;GO:0003777,microtubule motor activity;GO:0005524,ATP binding;GO:0005875,microtubule associated complex;GO:0007018,microtubule-based movement	K10405
c1583_g1	504.306	678.266	330.345	0.487043	-1.03788	5.95e-39	9.26e-38	16.95	8.27	-	-	4e-69 gnl|CDD|187598 cd05339, 17beta-HSDXI-like_SDR_c, human 17-beta-hydroxysteroid dehydrogenase XI-like, classical (c) SDRs. 17-beta-hydroxysteroid dehydrogenases (17betaHSD) are a group of isozymes that catalyze activation and inactivation of estrogen and androgens. 17betaHSD type XI, a classical SDR, preferentially converts 3alpha-adiol to androsterone but not numerous other tested steroids. …	4e-56 gnl|CDD|229143 KOG1201, KOG1201, KOG1201, Hydroxysteroid 17-beta dehydrogenase 11 [Secondary metabolites biosynthesis, transport and catabolism].	0.0 gb|EGY22718.1| estradiol 17-beta-dehydrogenase [Verticillium dahliae VdLs.17]	0.0 ref|XM_003004954.1| Verticillium albo-atrum VaMs.102 dehydrogenase/reductase SDR family member 8, mRNA	9e-23 gnl|CDD|215720 pfam00106, adh_short, short chain dehydrogenase. This family contains a wide variety of dehydrogenases.	6e-34 sp|Q8N3Y7|RDHE2_HUMAN Epidermal retinol dehydrogenase 2 OS=Homo sapiens GN=SDR16C5 PE=2 SV=2	0.0 tr|G2X2W2|G2X2W2_VERDV Estradiol 17-beta-dehydrogenase OS=Verticillium dahliae (strain VdLs.17 / ATCC MYA-4575 / FGSC 10137) GN=VDAG_04156 PE=3 SV=1	GO:0043616,keratinocyte proliferation;GO:0005789,endoplasmic reticulum membrane;GO:0050908,detection of light stimulus involved in visual perception;GO:0042574,retinal metabolic process;GO:0055114,oxidation-reduction process;GO:0004745,retinol dehydrogenase activity;GO:0000166,nucleotide binding;GO:0016021,integral to membrane;GO:0016491,oxidoreductase activity;GO:0042572,retinol metabolic process	-
c15831_g1	99.3982	145.732	53.0645	0.364124	-1.4575	3.29e-15	2.54e-14	74.56	27.94	-	-	-	-	-	4e-155 ref|XM_003004630.1| Verticillium albo-atrum VaMs.102 conserved hypothetical protein, mRNA	-	-	-	-	-
c15834_g1	76.7016	113.044	40.3589	0.357018	-1.48593	2e-12	1.27e-11	22.2	8.02	-	-	-	-	-	-	-	-	-	-	-
c15846_g1	51.2479	75.5899	26.9059	0.355946	-1.49027	8.68e-09	3.86e-08	4.51	1.61	-	-	2e-31 gnl|CDD|233141 TIGR00820, zip, ZIP zinc/iron transport family. The Zinc (Zn2+)-Iron (Fe2+) Permease (ZIP) Family (TC 2.A.5)Members of the ZIP family consist of proteins with eight putative transmembrane spanners. They are derived from animals, plants and yeast. Theycomprise a diverse family, with several paralogues in any one organism (e.g., at least five in Caenorabditis elegans, at least …	2e-26 gnl|CDD|229499 KOG1558, KOG1558, KOG1558, Fe2+/Zn2+ regulated transporter [Inorganic ion transport and metabolism].	0.0 gb|EGY17912.1| zinc-regulated transporter 2 [Verticillium dahliae VdLs.17]	0.0 ref|XM_003001791.1| Verticillium albo-atrum VaMs.102 zinc-regulated transporter 2, mRNA	7e-24 gnl|CDD|217089 pfam02535, Zip, ZIP Zinc transporter. The ZIP family consists of zinc transport proteins and many putative metal transporters. The main contribution to this family is from the Arabidopsis thaliana ZIP protein family these proteins are responsible for zinc uptake in the plant. Also found within this family are C. elegans proteins of unknown function which are annotated as bein…	2e-37 sp|Q12436|ZRT2_YEAST Zinc-regulated transporter 2 OS=Saccharomyces cerevisiae (strain ATCC 204508 / S288c) GN=ZRT2 PE=1 SV=1	0.0 tr|G2WSJ8|G2WSJ8_VERDV Zinc-regulated transporter 2 OS=Verticillium dahliae (strain VdLs.17 / ATCC MYA-4575 / FGSC 10137) GN=VDAG_01594 PE=4 SV=1	GO:0016020,membrane;GO:0000007,low-affinity zinc ion transmembrane transporter activity;GO:0046873,metal ion transmembrane transporter activity;GO:0006831,low-affinity zinc ion transport;GO:0016021,integral to membrane;GO:0005886,plasma membrane	-
c15847_g1	326.475	600.633	52.3171	0.0871032	-3.52113	5.83e-164	1.76e-162	26.99	2.36	-	-	7e-88 gnl|CDD|215702 pfam00083, Sugar_tr, Sugar (and other) transporter.	8e-78 gnl|CDD|228203 KOG0254, KOG0254, KOG0254, Predicted transporter (major facilitator superfamily) [General function prediction only].	0.0 gb|EGY20362.1| quinate permease [Verticillium dahliae VdLs.17]	0.0 ref|XM_003007199.1| Verticillium albo-atrum VaMs.102 quinate permease, mRNA	2e-88 gnl|CDD|215702 pfam00083, Sugar_tr, Sugar (and other) transporter.	5e-68 sp|A2QQV6|QUTD_ASPNC Probable quinate permease OS=Aspergillus niger (strain CBS 513.88 / FGSC A1513) GN=qutD PE=3 SV=1	0.0 tr|G2XIK9|G2XIK9_VERDV Quinate permease OS=Verticillium dahliae (strain VdLs.17 / ATCC MYA-4575 / FGSC 10137) GN=VDAG_09991 PE=3 SV=1	GO:0022891,substrate-specific transmembrane transporter activity;GO:0019630,quinate metabolic process;GO:0016021,integral to membrane;GO:0005886,plasma membrane	-
c15851_g1	296.753	543.43	50.0749	0.092146	-3.43993	1.4e-145	4.03e-144	60.57	5.62	-	-	-	-	2e-98 gb|EGY14487.1| hypothetical protein VDAG_05651 [Verticillium dahliae VdLs.17]	5e-158 ref|XM_003002186.1| Verticillium albo-atrum VaMs.102 conserved hypothetical protein, mRNA	-	-	3e-98 tr|G2X669|G2X669_VERDV Putative uncharacterized protein OS=Verticillium dahliae (strain VdLs.17 / ATCC MYA-4575 / FGSC 10137) GN=VDAG_05651 PE=4 SV=1	-	-
c15853_g1	447.424	787.225	107.624	0.136713	-2.87078	5.24e-177	1.62e-175	63.17	8.68	-	-	3e-115 gnl|CDD|193500 cd03879, M28_AAP, M28 Zn-Peptidase Aeromonas (Vibrio) proteolytica aminopeptidase. Peptidase family M28; Aeromonas (Vibrio) proteolytica aminopeptidase (AAP; leucine aminopeptidase from Vibrio proteolyticus; Bacterial leucyl aminopeptidase; E.C. 3.4.11.10) subfamily. AAP is a small (32kDa), heat stable leucine aminopeptidase and is active as a monomer. Similar forms of the e…	8e-15 gnl|CDD|230134 KOG2195, KOG2195, KOG2195, Transferrin receptor and related proteins containing the protease-associated (PA) domain [Posttranslational modification, protein turnover, chaperones, Inorganic ion transport and metabolism, General function prediction only].	0.0 gb|EGY16109.1| leucyl aminopeptidase [Verticillium dahliae VdLs.17]	0.0 ref|XM_003000584.1| Verticillium albo-atrum VaMs.102 leucine aminopeptidase, mRNA	2e-33 gnl|CDD|218057 pfam04389, Peptidase_M28, Peptidase family M28.	7e-79 sp|C5FFM0|LAP1_ARTOC Leucine aminopeptidase 1 OS=Arthroderma otae (strain ATCC MYA-4605 / CBS 113480) GN=LAP1 PE=3 SV=1	0.0 tr|G2XBD5|G2XBD5_VERDV Leucyl aminopeptidase OS=Verticillium dahliae (strain VdLs.17 / ATCC MYA-4575 / FGSC 10137) GN=VDAG_07273 PE=4 SV=1	GO:0006508,proteolysis;GO:0009405,pathogenesis;GO:0004177,aminopeptidase activity;GO:0005576,extracellular region;GO:0046872,metal ion binding	-
c15860_g1	239.854	338.452	141.256	0.417359	-1.26064	4.96e-27	5.88e-26	15.55	6.51	-	-	8e-21 gnl|CDD|215860 pfam00328, His_Phos_2, Histidine phosphatase superfamily (branch 2). The histidine phosphatase superfamily is so named because catalysis centres on a conserved His residue that is transiently phosphorylated during the catalytic cycle. Other conserved residues contribute to a 'phosphate pocket' and interact with the phospho group of substrate before, during and after its trans…	1e-24 gnl|CDD|231652 KOG3720, KOG3720, KOG3720, Lysosomal & prostatic acid phosphatases [Lipid transport and metabolism].	0.0 gb|EGY14875.1| hypothetical protein VDAG_06365 [Verticillium dahliae VdLs.17]	0.0 ref|XM_003000862.1| Verticillium albo-atrum VaMs.102 conserved hypothetical protein, mRNA	2e-21 gnl|CDD|215860 pfam00328, His_Phos_2, Histidine phosphatase superfamily (branch 2). The histidine phosphatase superfamily is so named because catalysis centres on a conserved His residue that is transiently phosphorylated during the catalytic cycle. Other conserved residues contribute to a 'phosphate pocket' and interact with the phospho group of substrate before, during and after its trans…	1e-60 sp|Q9USS6|PPA4_SCHPO Probable acid phosphatase SPBC4.06 OS=Schizosaccharomyces pombe (strain 972 / ATCC 24843) GN=SPBC4.06 PE=3 SV=1	0.0 tr|G2X7A7|G2X7A7_VERDV Putative uncharacterized protein OS=Verticillium dahliae (strain VdLs.17 / ATCC MYA-4575 / FGSC 10137) GN=VDAG_06365 PE=4 SV=1	GO:0003993,acid phosphatase activity;GO:0005739,mitochondrion	K01078-ko00740,Riboflavin metabolism;ko00627,Aminobenzoate degradation;ko05152,Tuberculosis
c15871_g1	22.1228	6.12891	38.1167	6.21917	2.63672	2.24e-09	1.04e-08	1.17	7.34	-	-	-	-	-	-	-	-	-	-	-
c15877_g1	703.185	983.35	423.021	0.430184	-1.21698	2.19e-71	4.74e-70	35.66	15.38	-	-	4e-14 gnl|CDD|222279 pfam13639, zf-RING_2, Ring finger domain.	5e-17 gnl|CDD|232556 KOG4628, KOG4628, KOG4628, Predicted E3 ubiquitin ligase [Posttranslational modification, protein turnover, chaperones].	0.0 gb|EGY15614.1| RING-7 protein [Verticillium dahliae VdLs.17]	0.0 ref|XM_003002518.1| Verticillium albo-atrum VaMs.102 RING-7 protein, mRNA	8e-15 gnl|CDD|222279 pfam13639, zf-RING_2, Ring finger domain.	8e-11 sp|O54965|RNF13_MOUSE E3 ubiquitin-protein ligase RNF13 OS=Mus musculus GN=Rnf13 PE=1 SV=2	0.0 tr|G2X9E6|G2X9E6_VERDV RING-7 protein OS=Verticillium dahliae (strain VdLs.17 / ATCC MYA-4575 / FGSC 10137) GN=VDAG_06778 PE=4 SV=1	GO:0051865,protein autoubiquitination;GO:0005765,lysosomal membrane;GO:0031902,late endosome membrane;GO:0005637,nuclear inner membrane;GO:0005829,cytosol;GO:0008270,zinc ion binding;GO:0016021,integral to membrane;GO:0004842,ubiquitin-protein ligase activity;GO:0046872,metal ion binding	-
c1589_g1	17.0162	26.5586	7.47387	0.28141	-1.82925	9.39e-05	0.000300146	2.78	0.77	-	-	-	-	-	-	-	-	-	-	-
c15895_g1	58.8716	87.8477	29.8955	0.34031	-1.55508	1.5e-10	7.69e-10	69.62	24.62	-	-	-	-	5e-32 gb|EGY16559.1| hypothetical protein VDAG_07723 [Verticillium dahliae VdLs.17]	5e-148 ref|XM_003004630.1| Verticillium albo-atrum VaMs.102 conserved hypothetical protein, mRNA	-	-	6e-32 tr|G2XC41|G2XC41_VERDV Putative uncharacterized protein OS=Verticillium dahliae (strain VdLs.17 / ATCC MYA-4575 / FGSC 10137) GN=VDAG_07723 PE=4 SV=1	-	-
c15896_g1	21.5755	32.6875	10.4634	0.320104	-1.64339	5.48e-05	0.000179992	14.55	4.78	-	-	-	-	-	-	-	-	-	-	-
c15903_g1	12.1659	3.40495	20.9268	6.146	2.61965	1.2e-05	4.2e-05	0.22	1.36	-	-	-	-	6e-49 gb|EGY17132.1| hypothetical protein VDAG_00814 [Verticillium dahliae VdLs.17]	-	-	-	7e-49 tr|G2WSI3|G2WSI3_VERDV Putative uncharacterized protein OS=Verticillium dahliae (strain VdLs.17 / ATCC MYA-4575 / FGSC 10137) GN=VDAG_00814 PE=4 SV=1	-	-
c15913_g1	189.736	270.353	109.118	0.403615	-1.30895	3.99e-23	4.22e-22	19.01	7.71	-	-	6e-58 gnl|CDD|235588 PRK05743, ileS, isoleucyl-tRNA synthetase; Reviewed.	1e-39 gnl|CDD|228382 KOG0433, KOG0433, KOG0433, Isoleucyl-tRNA synthetase [Translation, ribosomal structure and biogenesis].	8e-139 gb|EGY15274.1| isoleucyl-tRNA synthetase [Verticillium dahliae VdLs.17]	6e-129 ref|XM_003002802.1| Verticillium albo-atrum VaMs.102 isoleucyl-tRNA synthetase, mRNA	2e-13 gnl|CDD|215739 pfam00133, tRNA-synt_1, tRNA synthetases class I (I, L, M and V). Other tRNA synthetase sub-families are too dissimilar to be included.	4e-33 sp|Q7NF75|SYI_GLOVI Isoleucine--tRNA ligase OS=Gloeobacter violaceus (strain PCC 7421) GN=ileS PE=3 SV=1	9e-139 tr|G2X8I7|G2X8I7_VERDV Isoleucyl-tRNA synthetase OS=Verticillium dahliae (strain VdLs.17 / ATCC MYA-4575 / FGSC 10137) GN=VDAG_06128 PE=3 SV=1	GO:0005737,cytoplasm;GO:0006428,isoleucyl-tRNA aminoacylation;GO:0005524,ATP binding;GO:0002161,aminoacyl-tRNA editing activity;GO:0006450,regulation of translational fidelity;GO:0004822,isoleucine-tRNA ligase activity;GO:0046872,metal ion binding	K01870-ko00970,Aminoacyl-tRNA biosynthesis
c15925_g1	5.23171	0	10.4634	Inf	Inf	2.99e-05	0.000100802	0	4.39	-	-	-	-	-	-	-	-	-	-	-
c15928_g1	349.11	189.996	508.223	2.67491	1.41949	1.59e-12	1.03e-11	9.52	25.54	-	-	2e-52 gnl|CDD|119392 cd06174, MFS, The Major Facilitator Superfamily (MFS) is a large and diverse group of secondary transporters that includes uniporters, symporters, and antiporters. MFS proteins facilitate the transport across cytoplasmic or internal membranes of a variety of substrates including ions, sugar phosphates, drugs, neurotransmitters, nucleosides, amino acids, and peptides. They do …	2e-65 gnl|CDD|228204 KOG0255, KOG0255, KOG0255, Synaptic vesicle transporter SVOP and related transporters (major facilitator superfamily) [General function prediction only].	0.0 gb|EGY22260.1| polyamine transporter 1 [Verticillium dahliae VdLs.17]	0.0 ref|XM_003006594.1| Verticillium albo-atrum VaMs.102 polyamine transporter 1, mRNA	2e-46 gnl|CDD|219516 pfam07690, MFS_1, Major Facilitator Superfamily.	2e-85 sp|O59700|YN43_SCHPO Uncharacterized transporter C36.03c OS=Schizosaccharomyces pombe (strain 972 / ATCC 24843) GN=SPBC36.03c PE=3 SV=1	0.0 tr|G2X0B9|G2X0B9_VERDV Polyamine transporter 1 OS=Verticillium dahliae (strain VdLs.17 / ATCC MYA-4575 / FGSC 10137) GN=VDAG_03698 PE=4 SV=1	GO:0005783,endoplasmic reticulum;GO:0015606,spermidine transmembrane transporter activity;GO:0016021,integral to membrane;GO:0005886,plasma membrane;GO:0055085,transmembrane transport;GO:0000297,spermine transmembrane transporter activity	-
c1593_g1	109.837	153.904	65.77	0.427345	-1.22653	1.28e-12	8.32e-12	11.33	4.88	-	-	3e-08 gnl|CDD|132716 cd07040, HP, Histidine phosphatase domain found in a functionally diverse set of proteins, mostly phosphatases; contains a His residue which is phosphorylated during the reaction. Catalytic domain of a functionally diverse set of proteins, most of which are phosphatases. The conserved catalytic core of this domain contains a His residue which is phosphorylated in the reaction…	2e-17 gnl|CDD|232679 KOG4754, KOG4754, KOG4754, Predicted phosphoglycerate mutase [Carbohydrate transport and metabolism].	0.0 gb|EGY16931.1| phosphoglycerate mutase family protein [Verticillium dahliae VdLs.17]	0.0 ref|XM_003001339.1| Verticillium albo-atrum VaMs.102 phosphoglycerate mutase family protein, mRNA	1e-08 gnl|CDD|215845 pfam00300, His_Phos_1, Histidine phosphatase superfamily (branch 1). The histidine phosphatase superfamily is so named because catalysis centres on a conserved His residue that is transiently phosphorylated during the catalytic cycle. Other conserved residues contribute to a 'phosphate pocket' and interact with the phospho group of substrate before, during and after its trans…	5e-23 sp|P36069|PMU1_YEAST Probable phosphomutase PMU1 OS=Saccharomyces cerevisiae (strain ATCC 204508 / S288c) GN=PMU1 PE=1 SV=1	0.0 tr|G2XD63|G2XD63_VERDV Phosphoglycerate mutase family protein OS=Verticillium dahliae (strain VdLs.17 / ATCC MYA-4575 / FGSC 10137) GN=VDAG_08095 PE=4 SV=1	GO:0005737,cytoplasm;GO:0005634,nucleus;GO:0016853,isomerase activity	-
c15934_g1	17.9126	8.17188	27.6533	3.38396	1.75871	8.35e-05	0.000268427	3.17	10.96	VDBG_05323	ATP-citrate synthase	-	-	5e-08 ref|XP_003004210.1| ATP-citrate synthase [Verticillium alfalfae VaMs.102] gb|EEY19214.1| ATP-citrate synthase [Verticillium alfalfae VaMs.102]	-	-	-	6e-08 tr|C9SKJ6|C9SKJ6_VERA1 ATP-citrate synthase OS=Verticillium albo-atrum (strain VaMs.102 / ATCC MYA-4576 / FGSC 10136) GN=VDBG_05323 PE=4 SV=1	GO:0005524,ATP binding	-
c15939_g1	903.344	1277.54	529.15	0.414195	-1.27162	1.29e-98	3.25e-97	167.6	70	-	-	9e-23 gnl|CDD|239942 cd04496, SSB_OBF, SSB_OBF: A subfamily of OB folds similar to the OB fold of ssDNA-binding protein (SSB). SSBs bind with high affinity to ssDNA. They bind to and protect ssDNA intermediates during DNA metabolic pathways. All bacterial and eukaryotic SSBs studied to date oligomerize to bring together four OB folds in their active state. The majority (e.g. Escherichia coli SSB)…	7e-09 gnl|CDD|229594 KOG1653, KOG1653, KOG1653, Single-stranded DNA-binding protein [Replication, recombination and repair].	3e-78 gb|EGY14849.1| hypothetical protein VDAG_06339 [Verticillium dahliae VdLs.17]	0.0 ref|XM_003000836.1| Verticillium albo-atrum VaMs.102 conserved hypothetical protein, mRNA	1e-18 gnl|CDD|215919 pfam00436, SSB, Single-strand binding protein family. This family includes single stranded binding proteins and also the primosomal replication protein N (PriB). PriB forms a complex with PriA, PriC and ssDNA.	4e-10 sp|P32445|RIM1_YEAST Single-stranded DNA-binding protein RIM1, mitochondrial OS=Saccharomyces cerevisiae (strain ATCC 204508 / S288c) GN=RIM1 PE=1 SV=1	3e-78 tr|G2X781|G2X781_VERDV Single-stranded DNA-binding protein OS=Verticillium dahliae (strain VdLs.17 / ATCC MYA-4575 / FGSC 10137) GN=VDAG_06339 PE=3 SV=1	GO:0006260,DNA replication;GO:0003697,single-stranded DNA binding;GO:0006264,mitochondrial DNA replication;GO:0042645,mitochondrial nucleoid;GO:0005739,mitochondrion	-
c15941_g1	114.164	164.8	63.5279	0.385486	-1.37525	1.03e-15	8.14e-15	9.69	3.75	-	-	-	-	0.0 gb|EGY15055.1| hypothetical protein VDAG_06545 [Verticillium dahliae VdLs.17]	0.0 ref|XM_003001043.1| Verticillium albo-atrum VaMs.102 conserved hypothetical protein, mRNA	-	-	0.0 tr|G2X7T7|G2X7T7_VERDV Putative uncharacterized protein OS=Verticillium dahliae (strain VdLs.17 / ATCC MYA-4575 / FGSC 10137) GN=VDAG_06545 PE=4 SV=1	-	-
c15950_g1	608.354	820.593	396.115	0.482718	-1.05075	1.11e-47	1.96e-46	40.14	19.44	-	-	1e-48 gnl|CDD|235736 PRK06196, PRK06196, oxidoreductase; Provisional.	1e-41 gnl|CDD|229150 KOG1208, KOG1208, KOG1208, Dehydrogenases with different specificities (related to short-chain alcohol dehydrogenases) [Secondary metabolites biosynthesis, transport and catabolism].	0.0 gb|EGY16767.1| retinol dehydrogenase [Verticillium dahliae VdLs.17]	0.0 ref|XM_003009597.1| Verticillium albo-atrum VaMs.102 WW domain-containing oxidoreductase, mRNA	-	7e-25 sp|Q8CEE7|RDH13_MOUSE Retinol dehydrogenase 13 OS=Mus musculus GN=Rdh13 PE=2 SV=1	0.0 tr|G2XCP9|G2XCP9_VERDV Retinol dehydrogenase OS=Verticillium dahliae (strain VdLs.17 / ATCC MYA-4575 / FGSC 10137) GN=VDAG_07931 PE=4 SV=1	GO:0055114,oxidation-reduction process;GO:0000166,nucleotide binding;GO:0005739,mitochondrion;GO:0016491,oxidoreductase activity	-
c15953_g1	1445.25	2219.35	671.153	0.30241	-1.72542	8.06e-266	2.68e-264	61.59	18.66	-	-	1e-121 gnl|CDD|143590 cd07566, ScNTA1_like, Saccharomyces cerevisiae N-terminal amidase NTA1, and related proteins (class 3 nitrilases). Saccharomyces cerevisiae NTA1 functions in the N-end rule protein degradation pathway. It specifically deaminates the N-terminal asparagine and glutamine residues of substrates of this pathway, to aspartate and glutamate respectively, these latter are the destab…	5e-19 gnl|CDD|228752 KOG0806, KOG0806, KOG0806, Carbon-nitrogen hydrolase [Amino acid transport and metabolism].	0.0 gb|EGY18146.1| N-terminal amidase [Verticillium dahliae VdLs.17]	5e-113 ref|XM_387380.1| Gibberella zeae PH-1 hypothetical protein partial mRNA	3e-12 gnl|CDD|216124 pfam00795, CN_hydrolase, Carbon-nitrogen hydrolase. This family contains hydrolases that break carbon-nitrogen bonds. The family includes: Nitrilase EC:3.5.5.1, Aliphatic amidase EC:3.5.1.4, Biotidinase EC:3.5.1.12, Beta-ureidopropionase EC:3.5.1.6. Nitrilase-related proteins generally have a conserved E-K-C catalytic triad, and are multimeric alpha-beta-beta-alpha sandwich p…	9e-48 sp|O60178|NTA1_SCHPO Protein N-terminal amidase OS=Schizosaccharomyces pombe (strain 972 / ATCC 24843) GN=nta1 PE=3 SV=1	0.0 tr|G2XE98|G2XE98_VERDV N-terminal amidase OS=Verticillium dahliae (strain VdLs.17 / ATCC MYA-4575 / FGSC 10137) GN=VDAG_08480 PE=4 SV=1	GO:0006807,nitrogen compound metabolic process;GO:0005829,cytosol;GO:0005739,mitochondrion;GO:0031363,N-terminal protein amino acid deamination;GO:0005634,nucleus;GO:0008418,protein-N-terminal asparagine amidohydrolase activity;GO:0043161,proteasomal ubiquitin-dependent protein catabolic process;GO:0016810,hydrolase activity, acting on carbon-nitrogen (but not peptide) bonds	K14663
c15969_g1	159.625	290.102	29.1481	0.100475	-3.31509	5.41e-76	1.21e-74	14.35	1.45	-	-	0.0 gnl|CDD|223903 COG0833, LysP, Amino acid transporters [Amino acid transport and metabolism].	8e-149 gnl|CDD|229228 KOG1286, KOG1286, KOG1286, Amino acid transporters [Amino acid transport and metabolism].	0.0 gb|EGY21485.1| dicarboxylic amino acid permease [Verticillium dahliae VdLs.17]	0.0 ref|XM_003049723.1| Nectria haematococca mpVI 77-13-4 hypothetical protein, mRNA	5e-122 gnl|CDD|215858 pfam00324, AA_permease, Amino acid permease.	5e-163 sp|P53388|DIP5_YEAST Dicarboxylic amino acid permease OS=Saccharomyces cerevisiae (strain ATCC 204508 / S288c) GN=DIP5 PE=1 SV=1	0.0 tr|G2XJY5|G2XJY5_VERDV Dicarboxylic amino acid permease OS=Verticillium dahliae (strain VdLs.17 / ATCC MYA-4575 / FGSC 10137) GN=VDAG_10467 PE=4 SV=1	GO:0016021,integral to membrane;GO:0005886,plasma membrane;GO:0015171,amino acid transmembrane transporter activity	K16261
c15971_g1	260.325	355.477	165.172	0.46465	-1.10578	2.65e-23	2.83e-22	30.74	14.36	-	-	-	-	3e-95 gb|EGY16105.1| hypothetical protein VDAG_07269 [Verticillium dahliae VdLs.17]	0.0 ref|XM_003000580.1| Verticillium albo-atrum VaMs.102 predicted protein, mRNA	-	-	3e-95 tr|G2XBD1|G2XBD1_VERDV Putative uncharacterized protein OS=Verticillium dahliae (strain VdLs.17 / ATCC MYA-4575 / FGSC 10137) GN=VDAG_07269 PE=4 SV=1	-	-
c15973_g1	36.5309	9.53386	63.5279	6.66339	2.73626	2e-15	1.56e-14	2.72	18.45	-	-	-	-	-	-	-	-	-	-	-
c15996_g1	898.298	514.829	1281.77	2.4897	1.31597	0	0	23.51	58.69	-	-	3e-53 gnl|CDD|215689 pfam00067, p450, Cytochrome P450. Cytochrome P450s are haem-thiolate proteins involved in the oxidative degradation of various compounds. They are particularly well known for their role in the degradation of environmental toxins and mutagens. They can be divided into 4 classes, according to the method by which electrons from NAD(P)H are delivered to the catalytic site. Sequen…	4e-36 gnl|CDD|228107 KOG0157, KOG0157, KOG0157, Cytochrome P450 CYP4/CYP19/CYP26 subfamilies [Secondary metabolites biosynthesis, transport and catabolism, Lipid transport and metabolism].	0.0 gb|EGY19616.1| isotrichodermin C-15 hydroxylase [Verticillium dahliae VdLs.17]	0.0 ref|XM_003005439.1| Verticillium albo-atrum VaMs.102 cytochrome P450 52A6, mRNA	6e-54 gnl|CDD|215689 pfam00067, p450, Cytochrome P450. Cytochrome P450s are haem-thiolate proteins involved in the oxidative degradation of various compounds. They are particularly well known for their role in the degradation of environmental toxins and mutagens. They can be divided into 4 classes, according to the method by which electrons from NAD(P)H are delivered to the catalytic site. Sequen…	4e-57 sp|O13317|TRI11_FUSSP Isotrichodermin C-15 hydroxylase OS=Fusarium sporotrichioides GN=TRI11 PE=3 SV=1	0.0 tr|G2XIG8|G2XIG8_VERDV Isotrichodermin C-15 hydroxylase OS=Verticillium dahliae (strain VdLs.17 / ATCC MYA-4575 / FGSC 10137) GN=VDAG_09950 PE=3 SV=1	GO:0009055,electron carrier activity;GO:0020037,heme binding;GO:0004497,monooxygenase activity;GO:0005506,iron ion binding;GO:0016705,oxidoreductase activity, acting on paired donors, with incorporation or reduction of molecular oxygen	-
c1600_g1	672.624	935.68	409.568	0.437722	-1.19191	7.11e-66	1.48e-64	21.99	9.65	-	-	0.0 gnl|CDD|240369 PTZ00340, PTZ00340, O-sialoglycoprotein endopeptidase-like protein; Provisional.	0.0 gnl|CDD|230647 KOG2708, KOG2708, KOG2708, Predicted metalloprotease with chaperone activity (RNAse H/HSP70 fold) [Posttranslational modification, protein turnover, chaperones].	0.0 gb|EGY18016.1| O-sialoglycoprotein endopeptidase [Verticillium dahliae VdLs.17]	0.0 ref|XM_003008332.1| Verticillium albo-atrum VaMs.102 conserved hypothetical protein, mRNA	6e-79 gnl|CDD|216132 pfam00814, Peptidase_M22, Glycoprotease family. The Peptidase M22 proteins are part of the HSP70-actin superfamily. The region represented here is an insert into the fold and is not found in the rest of the family (beyond the Peptidase M22 family). Included in this family are the Rhizobial NodU proteins and the HypF regulator. This region also contains the histidine dyad beli…	0.0 sp|Q4I5V2|KAE1_GIBZE Probable tRNA threonylcarbamoyladenosine biosynthesis protein KAE1 OS=Gibberella zeae (strain PH-1 / ATCC MYA-4620 / FGSC 9075 / NRRL 31084) GN=KAE1 PE=3 SV=2	0.0 tr|G2XDW8|G2XDW8_VERDV O-sialoglycoprotein endopeptidase OS=Verticillium dahliae (strain VdLs.17 / ATCC MYA-4575 / FGSC 10137) GN=VDAG_08350 PE=4 SV=1	GO:0000781,chromosome, telomeric region;GO:0031490,chromatin DNA binding;GO:0005737,cytoplasm;GO:0000790,nuclear chromatin;GO:0070525,threonylcarbamoyladenosine metabolic process;GO:0045944,positive regulation of transcription from RNA polymerase II promoter;GO:0000408,EKC/KEOPS complex;GO:0006351,transcription, DNA-dependent;GO:0008033,tRNA processing;GO:0046872,metal ion binding;GO:0000723,telo…	K01409
c16000_g1	541.909	734.788	349.03	0.475007	-1.07398	2.29e-44	3.91e-43	68.15	32.56	-	-	2e-38 gnl|CDD|116878 pfam08294, TIM21, TIM21. TIM21 interacts with the outer mitochondrial TOM complex and promotes the insertion of proteins into the inner mitochondrial membrane.	4e-18 gnl|CDD|232761 KOG4836, KOG4836, KOG4836, Uncharacterized conserved protein [Function unknown].	4e-156 gb|EGY13906.1| import inner membrane translocase subunit tim-21 [Verticillium dahliae VdLs.17]	0.0 ref|XM_003009247.1| Verticillium albo-atrum VaMs.102 import inner membrane translocase subunit tim-21, mitochondrial, mRNA	4e-39 gnl|CDD|116878 pfam08294, TIM21, TIM21. TIM21 interacts with the outer mitochondrial TOM complex and promotes the insertion of proteins into the inner mitochondrial membrane.	1e-82 sp|Q4HZ95|TIM21_GIBZE Mitochondrial import inner membrane translocase subunit TIM21 OS=Gibberella zeae (strain PH-1 / ATCC MYA-4620 / FGSC 9075 / NRRL 31084) GN=TIM21 PE=3 SV=1	5e-156 tr|G2WQE6|G2WQE6_VERDV Import inner membrane translocase subunit tim-21 OS=Verticillium dahliae (strain VdLs.17 / ATCC MYA-4575 / FGSC 10137) GN=VDAG_00588 PE=4 SV=1	GO:0015031,protein transport;GO:0005743,mitochondrial inner membrane;GO:0016021,integral to membrane	K17796
c16004_g1	10.7375	2.04297	19.4321	9.51167	3.2497	2.65e-06	9.84e-06	0.28	2.71	-	-	-	-	-	-	-	-	-	-	-
c16014_g1	46.8947	11.5768	82.2126	7.10147	2.82812	7.77e-15	5.9e-14	1.43	10.25	-	-	-	-	-	-	-	-	-	-	-
c16023_g1	164.791	23.1537	306.429	13.2346	3.72624	4.22e-14	3.04e-13	2.96	39.49	-	-	-	-	-	-	-	-	-	-	-
c16035_g1	199.668	281.249	118.087	0.419867	-1.252	1.68e-22	1.74e-21	37.74	15.98	-	-	-	-	3e-89 gb|EGY23779.1| hypothetical protein VDAG_05217 [Verticillium dahliae VdLs.17]	4e-144 ref|XM_002999641.1| Verticillium albo-atrum VaMs.102 predicted protein, mRNA	-	-	4e-89 tr|G2X4Y5|G2X4Y5_VERDV Putative uncharacterized protein OS=Verticillium dahliae (strain VdLs.17 / ATCC MYA-4575 / FGSC 10137) GN=VDAG_05217 PE=4 SV=1	-	-
c16044_g1	32.0559	47.6693	16.4425	0.344929	-1.53563	3.2e-06	1.18e-05	5.65	1.96	-	-	-	-	-	-	-	-	-	-	-
c16051_g1	65.3393	39.4974	91.1812	2.30853	1.20698	5.72e-08	2.39e-07	10.72	25.17	-	-	-	-	2e-37 gb|EGY21158.1| hypothetical protein VDAG_02682 [Verticillium dahliae VdLs.17]	3e-93 ref|XM_003007977.1| Verticillium albo-atrum VaMs.102 conserved hypothetical protein, mRNA	-	-	2e-37 tr|G2WYK0|G2WYK0_VERDV Putative uncharacterized protein OS=Verticillium dahliae (strain VdLs.17 / ATCC MYA-4575 / FGSC 10137) GN=VDAG_02682 PE=4 SV=1	-	-
c16058_g1	67.7492	97.3816	38.1167	0.391416	-1.35322	1.18e-09	5.6e-09	17.11	6.77	-	-	3e-19 gnl|CDD|238520 cd01087, Prolidase, Prolidase. E.C. 3.4.13.9. Also known as Xaa-Pro dipeptidase, X-Pro dipeptidase, proline dipeptidase., imidodipeptidase, peptidase D, gamma-peptidase. Catalyses hydrolysis of Xaa-Pro dipeptides; also acts on aminoacyl-hydroxyproline analogs. No action on Pro-Pro.	1e-18 gnl|CDD|230676 KOG2737, KOG2737, KOG2737, Putative metallopeptidase [General function prediction only].	6e-54 gb|EGY22285.1| xaa-Pro dipeptidase [Verticillium dahliae VdLs.17]	6e-116 ref|XM_003006622.1| Verticillium albo-atrum VaMs.102 xaa-Pro aminopeptidase I, mRNA	1e-07 gnl|CDD|215993 pfam00557, Peptidase_M24, Metallopeptidase family M24. This family contains metallopeptidases. It also contains non-peptidase homologues such as the N terminal domain of Spt16 which is a histone H3-H4 binding module.	2e-50 sp|C9SEV5|AMPP3_VERA1 Probable Xaa-Pro aminopeptidase PEPP OS=Verticillium albo-atrum (strain VaMs.102 / ATCC MYA-4576 / FGSC 10136) GN=PEPP PE=3 SV=1	7e-54 tr|G2X0E4|G2X0E4_VERDV Xaa-Pro dipeptidase OS=Verticillium dahliae (strain VdLs.17 / ATCC MYA-4575 / FGSC 10137) GN=VDAG_03723 PE=3 SV=1	GO:0006508,proteolysis;GO:0009987,cellular process;GO:0008237,metallopeptidase activity;GO:0004177,aminopeptidase activity;GO:0030145,manganese ion binding;GO:0046872,metal ion binding	-
c16063_g1	50.5337	74.9089	26.1585	0.349205	-1.51786	6.39e-09	2.86e-08	23.81	8.48	-	-	-	-	-	-	-	-	-	-	-
c16067_g1	30.0368	4.76693	55.3066	11.6021	3.53632	0	0	1.06	12.48	-	-	-	-	5e-126 gb|EGY22989.1| serine/threonine-protein kinase SCH9 [Verticillium dahliae VdLs.17]	-	-	-	6e-126 tr|G2X2A3|G2X2A3_VERDV Serine/threonine-protein kinase SCH9 OS=Verticillium dahliae (strain VdLs.17 / ATCC MYA-4575 / FGSC 10137) GN=VDAG_04427 PE=4 SV=1	GO:0005524,ATP binding;GO:0004674,protein serine/threonine kinase activity	-
c16077_g1	278.456	167.524	389.389	2.32438	1.21685	1.73e-12	1.11e-11	15.89	37.16	-	-	2e-73 gnl|CDD|217427 pfam03211, Pectate_lyase, Pectate lyase.	-	4e-163 gb|EGY15301.1| pectate lyase [Verticillium dahliae VdLs.17]	0.0 ref|XM_002999785.1| Verticillium albo-atrum VaMs.102 pectate lyase, mRNA	5e-74 gnl|CDD|217427 pfam03211, Pectate_lyase, Pectate lyase.	2e-100 sp|A1DBJ7|PLYE_NEOFI Probable pectate lyase E OS=Neosartorya fischeri (strain ATCC 1020 / DSM 3700 / FGSC A1164 / NRRL 181) GN=plyE PE=3 SV=1	5e-163 tr|G2X8L4|G2X8L4_VERDV Pectate lyase OS=Verticillium dahliae (strain VdLs.17 / ATCC MYA-4575 / FGSC 10137) GN=VDAG_06155 PE=4 SV=1	GO:0030570,pectate lyase activity;GO:0000272,polysaccharide catabolic process;GO:0005576,extracellular region	-
c1608_g1	1050.45	1402.84	698.059	0.497604	-1.00693	5.78e-75	1.28e-73	33.43	16.65	-	-	2e-66 gnl|CDD|221713 pfam12689, Acid_PPase, Acid Phosphatase. This family contains phosphatase enzymes and other proteins of the HAD superfamily. It includes MDP-1 which is a eukaryotic magnesium-dependent acid phosphatase.	6e-25 gnl|CDD|232477 KOG4549, KOG4549, KOG4549, Magnesium-dependent phosphatase [General function prediction only].	0.0 gb|EGY14121.1| Sec14 cytosolic factor [Verticillium dahliae VdLs.17]	0.0 ref|XM_003009473.1| Verticillium albo-atrum VaMs.102 Sec14 cytosolic factor, mRNA	5e-67 gnl|CDD|221713 pfam12689, Acid_PPase, Acid Phosphatase. This family contains phosphatase enzymes and other proteins of the HAD superfamily. It includes MDP-1 which is a eukaryotic magnesium-dependent acid phosphatase.	5e-31 sp|O94279|MGDP1_SCHPO Putative magnesium-dependent phosphatase P8B7.31 OS=Schizosaccharomyces pombe (strain 972 / ATCC 24843) GN=SPBP8B7.31 PE=1 SV=2	0.0 tr|G2WR22|G2WR22_VERDV Sec14 cytosolic factor OS=Verticillium dahliae (strain VdLs.17 / ATCC MYA-4575 / FGSC 10137) GN=VDAG_00803 PE=4 SV=1	GO:0016791,phosphatase activity;GO:0035335,peptidyl-tyrosine dephosphorylation;GO:0005829,cytosol;GO:0005634,nucleus;GO:0004725,protein tyrosine phosphatase activity;GO:0046872,metal ion binding	-
c16080_g1	29.9125	14.9818	44.8432	2.99318	1.58168	3.11e-06	1.15e-05	2.27	6.85	-	-	-	-	-	-	-	-	-	-	-
c16090_g1	37.1216	51.0743	23.169	0.453633	-1.1404	0.000123175	0.000387485	2.51	1.14	-	-	8e-23 gnl|CDD|216574 pfam01565, FAD_binding_4, FAD binding domain. This family consists of various enzymes that use FAD as a co-factor, most of the enzymes are similar to oxygen oxidoreductase. One of the enzymes Vanillyl-alcohol oxidase (VAO) has a solved structure, the alignment includes the FAD binding site, called the PP-loop, between residues 99-110. The FAD molecule is covalently bound in t…	6e-06 gnl|CDD|229173 KOG1231, KOG1231, KOG1231, Proteins containing the FAD binding domain [Energy production and conversion].	0.0 gb|EGY21308.1| FAD binding domain-containing protein [Verticillium dahliae VdLs.17]	0.0 ref|XM_003008129.1| Verticillium albo-atrum VaMs.102 FAD binding domain-containing protein, mRNA	2e-23 gnl|CDD|216574 pfam01565, FAD_binding_4, FAD binding domain. This family consists of various enzymes that use FAD as a co-factor, most of the enzymes are similar to oxygen oxidoreductase. One of the enzymes Vanillyl-alcohol oxidase (VAO) has a solved structure, the alignment includes the FAD binding site, called the PP-loop, between residues 99-110. The FAD molecule is covalently bound in t…	2e-10 sp|P08159|HDNO_ARTOX 6-hydroxy-D-nicotine oxidase OS=Arthrobacter oxidans PE=1 SV=2	0.0 tr|G2WX53|G2WX53_VERDV FAD binding domain-containing protein OS=Verticillium dahliae (strain VdLs.17 / ATCC MYA-4575 / FGSC 10137) GN=VDAG_02832 PE=4 SV=1	GO:0008762,UDP-N-acetylmuramate dehydrogenase activity;GO:0050660,flavin adenine dinucleotide binding;GO:0019608,nicotine catabolic process;GO:0018530,(R)-6-hydroxynicotine oxidase activity	-
c16102_g1	836.607	1144.06	529.15	0.462518	-1.11242	5.64e-72	1.23e-70	58.1	26.96	-	-	-	-	0.0 gb|EGY15605.1| hypothetical protein VDAG_06769 [Verticillium dahliae VdLs.17]	0.0 ref|XM_003002509.1| Verticillium albo-atrum VaMs.102 conserved hypothetical protein, mRNA	-	-	0.0 tr|G2X9D7|G2X9D7_VERDV Putative uncharacterized protein OS=Verticillium dahliae (strain VdLs.17 / ATCC MYA-4575 / FGSC 10137) GN=VDAG_06769 PE=4 SV=1	-	-
c16120_g1	27.0234	43.5834	10.4634	0.240078	-2.05842	5.24e-08	2.2e-07	2.5	0.6	-	-	9e-50 gnl|CDD|213391 cd12148, fungal_TF_MHR, fungal transcription factor regulatory middle homology region. This domain is present in the large family of fungal zinc cluster transcription factors that contain an N-terminal GAL4-like C6 zinc binuclear cluster DNA-binding domain. Examples of members of this large fungal group are the following Saccharomyces cerevisiae transcription factors, GAL4, S…	-	0.0 gb|EGY18785.1| C6 transcription factor domain-containing protein [Verticillium dahliae VdLs.17]	0.0 ref|XM_003004008.1| Verticillium albo-atrum VaMs.102 C6 transcription factor domain-containing protein, mRNA	6e-19 gnl|CDD|217880 pfam04082, Fungal_trans, Fungal specific transcription factor domain.	4e-12 sp|Q9UTN0|YII3_SCHPO Uncharacterized transcriptional regulatory protein C139.03 OS=Schizosaccharomyces pombe (strain 972 / ATCC 24843) GN=SPAC139.03 PE=4 SV=1	0.0 tr|G2XFW6|G2XFW6_VERDV C6 transcription factor domain-containing protein OS=Verticillium dahliae (strain VdLs.17 / ATCC MYA-4575 / FGSC 10137) GN=VDAG_08945 PE=4 SV=1	GO:0000981,sequence-specific DNA binding RNA polymerase II transcription factor activity;GO:0005737,cytoplasm;GO:0000978,RNA polymerase II core promoter proximal region sequence-specific DNA binding;GO:0003677,DNA binding;GO:0006357,regulation of transcription from RNA polymerase II promoter;GO:0008270,zinc ion binding;GO:0005819,spindle;GO:0005634,nucleus;GO:0006366,transcription from RNA polyme…	-
c16129_g1	120.24	70.823	169.657	2.39551	1.26033	0	0	7.79	18.79	-	-	1e-34 gnl|CDD|200472 cd11333, AmyAc_SI_OligoGlu_DGase, Alpha amylase catalytic domain found in Sucrose isomerases, oligo-1,6-glucosidase (also called isomaltase; sucrase-isomaltase; alpha-limit dextrinase), dextran glucosidase (also called glucan 1,6-alpha-glucosidase), and related proteins. The sucrose isomerases (SIs) Isomaltulose synthase (EC 5.4.99.11) and Trehalose synthase (EC 5.4.99.16) ca…	4e-18 gnl|CDD|228420 KOG0471, KOG0471, KOG0471, Alpha-amylase [Carbohydrate transport and metabolism].	1e-34 gb|EGY14791.1| alpha-glucosidase [Verticillium dahliae VdLs.17]	2e-23 ref|XM_002999739.1| Verticillium albo-atrum VaMs.102 alpha-glucosidase, mRNA	3e-09 gnl|CDD|215737 pfam00128, Alpha-amylase, Alpha amylase, catalytic domain. Alpha amylase is classified as family 13 of the glycosyl hydrolases. The structure is an 8 stranded alpha/beta barrel containing the active site, interrupted by a ~70 a.a. calcium-binding domain protruding between beta strand 3 and alpha helix 3, and a carboxyl-terminal Greek key beta-barrel domain.	2e-20 sp|Q02751|MALT_CANAX Alpha-glucosidase OS=Candida albicans GN=MAL2 PE=1 SV=4	2e-34 tr|G2X723|G2X723_VERDV Alpha-glucosidase OS=Verticillium dahliae (strain VdLs.17 / ATCC MYA-4575 / FGSC 10137) GN=VDAG_05955 PE=4 SV=1	GO:0000023,maltose metabolic process;GO:0032450,maltose alpha-glucosidase activity;GO:0003824,catalytic activity;GO:0043169,cation binding;GO:0005975,carbohydrate metabolic process	-
c16132_g1	32.9029	45.6263	20.1794	0.442276	-1.17698	0.000200619	0.000617979	11.48	5.16	-	-	-	-	8e-08 gb|EGY19534.1| hypothetical protein VDAG_09868 [Verticillium dahliae VdLs.17]	-	-	-	1e-07 tr|G2XI86|G2XI86_VERDV Putative uncharacterized protein OS=Verticillium dahliae (strain VdLs.17 / ATCC MYA-4575 / FGSC 10137) GN=VDAG_09868 PE=4 SV=1	-	-
c16134_g1	11.4849	2.04297	20.9268	10.2433	3.35661	7.3e-07	2.83e-06	0.34	3.52	-	-	-	-	2e-24 gb|ENH61971.1| hypothetical protein FOC1_g10014924 [Fusarium oxysporum f. sp. cubense race 1]	-	-	-	2e-24 tr|N4TZJ0|N4TZJ0_FUSOX Uncharacterized protein OS=Fusarium oxysporum f. sp. cubense race 1 GN=FOC1_g10014924 PE=4 SV=1	-	-
c16143_g1	24.4322	35.4115	13.453	0.379904	-1.39629	0.000191722	0.000591475	2.12	0.81	-	-	1e-06 gnl|CDD|173757 cd08217, STKc_Nek2, Catalytic domain of the Protein Serine/Threonine Kinase, Never In Mitosis gene A-related kinase 2. Serine/Threonine Kinases (STKs), Never In Mitosis gene A (NIMA)-related kinase 2 (Nek2) subfamily, catalytic (c) domain. STKs catalyze the transfer of the gamma-phosphoryl group from ATP to serine/threonine residues on protein substrates. The Nek2 subfamily i…	4e-06 gnl|CDD|228539 KOG0591, KOG0591, KOG0591, NIMA (never in mitosis)-related G2-specific serine/threonine protein kinase [Cell cycle control, cell division, chromosome partitioning].	0.0 gb|EGY14421.1| hypothetical protein VDAG_05585 [Verticillium dahliae VdLs.17]	0.0 ref|XM_003001709.1| Verticillium albo-atrum VaMs.102 conserved hypothetical protein, mRNA	-	-	0.0 tr|G2X5T0|G2X5T0_VERDV Putative uncharacterized protein OS=Verticillium dahliae (strain VdLs.17 / ATCC MYA-4575 / FGSC 10137) GN=VDAG_05585 PE=4 SV=1	GO:0004672,protein kinase activity;GO:0005524,ATP binding	-
c16192_g1	70.4042	12.2578	128.551	10.4872	3.39056	1.6e-14	1.19e-13	1.49	15.74	-	-	-	-	-	-	-	-	-	-	-
c1621_g1	590.516	189.996	991.035	5.21608	2.38296	1.59e-12	1.03e-11	12.19	63.92	-	-	2e-81 gnl|CDD|176211 cd08249, enoyl_reductase_like, enoyl_reductase_like. Member identified as possible enoyl reductase of the MDR family. 2-enoyl thioester reductase (ETR) catalyzes the NADPH-dependent dependent conversion of trans-2-enoyl acyl carrier protein/coenzyme A (ACP/CoA) to acyl-(ACP/CoA) in fatty acid synthesis. 2-enoyl thioester reductase activity has been linked in Candida tropicali…	9e-27 gnl|CDD|229140 KOG1198, KOG1198, KOG1198, Zinc-binding oxidoreductase [Energy production and conversion, General function prediction only].	0.0 gb|EGY21418.1| alcohol dehydrogenase [Verticillium dahliae VdLs.17]	0.0 ref|XM_003008233.1| Verticillium albo-atrum VaMs.102 alcohol dehydrogenase, mRNA	4e-08 gnl|CDD|219758 pfam08240, ADH_N, Alcohol dehydrogenase GroES-like domain. This is the catalytic domain of alcohol dehydrogenases. Many of them contain an inserted zinc binding domain. This domain has a GroES-like structure.	1e-14 sp|Q8H0M1|QORH_SPIOL Quinone-oxidoreductase homolog, chloroplastic OS=Spinacia oleracea GN=QOR PE=1 SV=1	0.0 tr|G2WXG3|G2WXG3_VERDV Alcohol dehydrogenase OS=Verticillium dahliae (strain VdLs.17 / ATCC MYA-4575 / FGSC 10137) GN=VDAG_02942 PE=4 SV=1	GO:0008270,zinc ion binding;GO:0016491,oxidoreductase activity;GO:0009706,chloroplast inner membrane	-
c16225_g1	136.686	193.401	79.9704	0.413495	-1.27406	2.42e-16	1.98e-15	6.91	2.86	-	-	-	6e-40 gnl|CDD|228774 KOG0828, KOG0828, KOG0828, Predicted E3 ubiquitin ligase [Posttranslational modification, protein turnover, chaperones].	0.0 gb|EGY17772.1| transmembrane E3 ubiquitin-protein ligase [Verticillium dahliae VdLs.17]	0.0 ref|XM_003006226.1| Verticillium albo-atrum VaMs.102 transmembrane E3 ubiquitin-protein ligase, mRNA	2e-10 gnl|CDD|222279 pfam13639, zf-RING_2, Ring finger domain.	8e-28 sp|O43085|DSC1_SCHPO DSC E3 ubiquitin ligase complex subunit 1 OS=Schizosaccharomyces pombe (strain 972 / ATCC 24843) GN=dsc1 PE=1 SV=2	0.0 tr|G2WUI1|G2WUI1_VERDV Transmembrane E3 ubiquitin-protein ligase OS=Verticillium dahliae (strain VdLs.17 / ATCC MYA-4575 / FGSC 10137) GN=VDAG_01454 PE=4 SV=1	GO:0005783,endoplasmic reticulum;GO:0016874,ligase activity;GO:0005789,endoplasmic reticulum membrane;GO:0043162,ubiquitin-dependent protein catabolic process via the multivesicular body sorting pathway;GO:0000139,Golgi membrane;GO:0008270,zinc ion binding;GO:0016021,integral to membrane;GO:0004842,ubiquitin-protein ligase activity;GO:0046872,metal ion binding;GO:0005794,Golgi apparatus	-
c16251_g1	31.2243	3.40495	59.0436	17.3405	4.11607	0	0	0.3	5.15	-	-	-	-	-	-	-	-	-	-	-
c16275_g1	9.68283	0.68099	18.6847	27.4375	4.77808	1.26e-07	5.15e-07	0.2	5.67	-	-	-	-	-	-	-	-	-	-	-
c16289_g1	7.89778	14.3008	1.49477	0.104524	-3.2581	8.94e-05	0.000286577	1.73	0.18	VDBG_09467	general alpha-glucoside permease	4e-34 gnl|CDD|233165 TIGR00879, SP, MFS transporter, sugar porter (SP) family. This model represent the sugar porter subfamily of the major facilitator superfamily (pfam00083) [Transport and binding proteins, Carbohydrates, organic alcohols, and acids].	2e-20 gnl|CDD|228203 KOG0254, KOG0254, KOG0254, Predicted transporter (major facilitator superfamily) [General function prediction only].	9e-176 ref|XP_003000272.1| general alpha-glucoside permease [Verticillium alfalfae VaMs.102] gb|EEY23357.1| general alpha-glucoside permease [Verticillium alfalfae VaMs.102]	0.0 ref|XM_003000226.1| Verticillium albo-atrum VaMs.102 general alpha-glucoside permease, mRNA	2e-27 gnl|CDD|215702 pfam00083, Sugar_tr, Sugar (and other) transporter.	3e-36 sp|A6ZX88|MPH3_YEAS7 Alpha-glucosides permease MPH3 OS=Saccharomyces cerevisiae (strain YJM789) GN=MPH3 PE=3 SV=1	1e-175 tr|C9SXG7|C9SXG7_VERA1 General alpha-glucoside permease OS=Verticillium albo-atrum (strain VaMs.102 / ATCC MYA-4576 / FGSC 10136) GN=VDBG_09467 PE=4 SV=1	GO:0000023,maltose metabolic process;GO:0022891,substrate-specific transmembrane transporter activity;GO:0008643,carbohydrate transport;GO:0016021,integral to membrane;GO:0005886,plasma membrane;GO:0022857,transmembrane transporter activity	-
c1629_g1	99.3233	139.603	59.0436	0.422939	-1.24148	9.01e-12	5.32e-11	2.74	1.16	-	-	0.0 gnl|CDD|99917 cd05534, POLBc_zeta, DNA polymerase type-B zeta subfamily catalytic domain. DNA polymerase (Pol) zeta is a member of the eukaryotic B-family of DNA polymerases and distantly related to DNA Pol delta. Pol zeta plays a major role in translesion replication and the production of either spontaneous or induced mutations. Apart from its role in translesion replication, Pol zeta also a…	0.0 gnl|CDD|228914 KOG0968, KOG0968, KOG0968, DNA polymerase zeta, catalytic subunit [Replication, recombination and repair].	0.0 gb|EGY20914.1| DNA polymerase zeta catalytic subunit [Verticillium dahliae VdLs.17]	0.0 ref|XM_003007746.1| Verticillium albo-atrum VaMs.102 DNA polymerase zeta catalytic subunit, mRNA	3e-89 gnl|CDD|215742 pfam00136, DNA_pol_B, DNA polymerase family B. This region of DNA polymerase B appears to consist of more than one structural domain, possibly including elongation, DNA-binding and dNTP binding activities.	0.0 sp|P14284|DPOZ_YEAST DNA polymerase zeta catalytic subunit OS=Saccharomyces cerevisiae (strain ATCC 204508 / S288c) GN=REV3 PE=1 SV=1	0.0 tr|G2WXV6|G2WXV6_VERDV DNA polymerase OS=Verticillium dahliae (strain VdLs.17 / ATCC MYA-4575 / FGSC 10137) GN=VDAG_02438 PE=3 SV=1	GO:0006260,DNA replication;GO:0051539,4 iron, 4 sulfur cluster binding;GO:0070987,error-free translesion synthesis;GO:0003887,DNA-directed DNA polymerase activity;GO:0003677,DNA binding;GO:0000166,nucleotide binding;GO:0005739,mitochondrion;GO:0005634,nucleus;GO:0016035,zeta DNA polymerase complex;GO:0042276,error-prone translesion synthesis;GO:0046872,metal ion binding	K02350-ko03460,Fanconi anemia pathway
c1631_g1	1096.92	380.673	1813.16	4.76303	2.25188	1.87e-11	1.06e-10	8.05	38.36	VDBG_08021	RING finger protein	3e-26 gnl|CDD|223461 COG0384, COG0384, Predicted epimerase, PhzC/PhzF homolog [General function prediction only].	4e-80 gnl|CDD|228750 KOG0804, KOG0804, KOG0804, Cytoplasmic Zn-finger protein BRAP2 (BRCA1 associated protein) [General function prediction only].	0.0 ref|XP_003001762.1| RING finger protein [Verticillium alfalfae VaMs.102] gb|EEY21911.1| RING finger protein [Verticillium alfalfae VaMs.102]	0.0 ref|XM_003001716.1| Verticillium albo-atrum VaMs.102 RING finger protein, mRNA	2e-22 gnl|CDD|216903 pfam02148, zf-UBP, Zn-finger in ubiquitin-hydrolases and other protein.	3e-78 sp|O13747|EPT1_SCHPO RING finger protein ETP1 homolog OS=Schizosaccharomyces pombe (strain 972 / ATCC 24843) GN=SPAC16E8.13 PE=3 SV=1	0.0 tr|C9SSZ6|C9SSZ6_VERA1 RING finger protein OS=Verticillium albo-atrum (strain VaMs.102 / ATCC MYA-4576 / FGSC 10136) GN=VDBG_08021 PE=4 SV=1	GO:0005829,cytosol;GO:0008270,zinc ion binding;GO:0004842,ubiquitin-protein ligase activity;GO:0046872,metal ion binding	K10632-ko04014,Ras signaling pathway
c1637_g1	3386.25	4970.55	1801.95	0.362525	-1.46385	0	0	126.15	45.83	-	-	9e-49 gnl|CDD|213391 cd12148, fungal_TF_MHR, fungal transcription factor regulatory middle homology region. This domain is present in the large family of fungal zinc cluster transcription factors that contain an N-terminal GAL4-like C6 zinc binuclear cluster DNA-binding domain. Examples of members of this large fungal group are the following Saccharomyces cerevisiae transcription factors, GAL4, S…	-	0.0 gb|EGY15996.1| hypothetical protein VDAG_07160 [Verticillium dahliae VdLs.17]	0.0 ref|XM_003004352.1| Verticillium albo-atrum VaMs.102 conserved hypothetical protein, mRNA	2e-26 gnl|CDD|217880 pfam04082, Fungal_trans, Fungal specific transcription factor domain.	8e-33 sp|P28349|NIT4_NEUCR Nitrogen assimilation transcription factor nit-4 OS=Neurospora crassa (strain ATCC 24698 / 74-OR23-1A / CBS 708.71 / DSM 1257 / FGSC 987) GN=nit-4 PE=4 SV=2	0.0 tr|G2X9W5|G2X9W5_VERDV Putative uncharacterized protein OS=Verticillium dahliae (strain VdLs.17 / ATCC MYA-4575 / FGSC 10137) GN=VDAG_07160 PE=4 SV=1	GO:0000981,sequence-specific DNA binding RNA polymerase II transcription factor activity;GO:0042128,nitrate assimilation;GO:0003677,DNA binding;GO:0006357,regulation of transcription from RNA polymerase II promoter;GO:0008270,zinc ion binding;GO:0005634,nucleus;GO:0006366,transcription from RNA polymerase II promoter;GO:0046872,metal ion binding	-
c16379_g1	6.5026	12.2578	0.747387	0.0609722	-4.0357	9.1e-05	0.000291291	1.34	0.08	VDBG_02678	TPR domain-containing protein	-	6e-06 gnl|CDD|228501 KOG0553, KOG0553, KOG0553, TPR repeat-containing protein [General function prediction only].	0.0 ref|XP_003006539.1| TPR domain-containing protein [Verticillium alfalfae VaMs.102] gb|EEY16569.1| TPR domain-containing protein [Verticillium alfalfae VaMs.102]	0.0 ref|XM_003006493.1| Verticillium albo-atrum VaMs.102 TPR domain-containing protein, mRNA	-	-	0.0 tr|C9SEH6|C9SEH6_VERA1 TPR domain-containing protein OS=Verticillium albo-atrum (strain VaMs.102 / ATCC MYA-4576 / FGSC 10136) GN=VDBG_02678 PE=4 SV=1	-	-
c16423_g1	24.6731	38.1354	11.2108	0.293973	-1.76624	4.41e-06	1.61e-05	6.75	2.01	-	-	-	-	-	-	-	-	-	-	-
c16466_g1	51.0138	19.0677	82.9599	4.3508	2.12128	6.22e-14	4.41e-13	3.93	17.32	-	-	-	-	-	-	-	-	-	-	-
c1647_g1	20.6289	36.7735	4.48432	0.121944	-3.0357	4.98e-10	2.41e-09	3.01	0.37	-	-	5e-06 gnl|CDD|221993 pfam13229, Beta_helix, Right handed beta helix region. This region contains a parallel beta helix region that shares some similarity with Pectate lyases.	-	0.0 gb|ELA34784.1| pectate lyase [Colletotrichum gloeosporioides Nara gc5]	-	1e-06 gnl|CDD|221993 pfam13229, Beta_helix, Right handed beta helix region. This region contains a parallel beta helix region that shares some similarity with Pectate lyases.	4e-41 sp|P0C1A6|PLYL_ERWCH Pectate lyase L OS=Erwinia chrysanthemi GN=pelL PE=3 SV=1	0.0 tr|L2G7Y5|L2G7Y5_COLGN Pectate lyase OS=Colletotrichum gloeosporioides (strain Nara gc5) GN=CGGC5_5477 PE=4 SV=1	GO:0030570,pectate lyase activity;GO:0045490,pectin catabolic process;GO:0005576,extracellular region;GO:0046872,metal ion binding	-
c16470_g1	12.0995	4.76693	19.4321	4.07643	2.02731	0.000304303	0.000920496	1.62	6.73	-	-	-	-	-	-	-	-	-	-	-
c16472_g1	25.1541	12.9388	37.3693	2.88816	1.53015	3.32e-05	0.000111421	3.3	9.68	-	-	-	-	-	-	-	-	-	-	-
c16473_g1	12.3319	0	24.6638	Inf	Inf	2.31e-11	1.29e-10	0	6.44	-	-	-	-	-	-	-	-	-	-	-
c16495_g1	15.77	6.12891	25.4112	4.14611	2.05176	2.94e-05	9.92e-05	0.75	3.14	VDBG_06010	hypothetical protein	-	-	3e-10 ref|XP_003003568.1| predicted protein [Verticillium alfalfae VaMs.102] gb|EEY19901.1| predicted protein [Verticillium alfalfae VaMs.102]	7e-67 ref|XM_003003522.1| Verticillium albo-atrum VaMs.102 predicted protein, mRNA	-	-	3e-10 tr|C9SM86|C9SM86_VERA1 Predicted protein OS=Verticillium albo-atrum (strain VaMs.102 / ATCC MYA-4576 / FGSC 10136) GN=VDBG_06010 PE=4 SV=1	-	-
c16525_g1	12.4238	21.1107	3.73693	0.177016	-2.49805	2.55e-05	8.64e-05	3.43	0.61	-	-	-	-	2e-39 gb|EGY15829.1| necrosis- and ethylene-inducing protein [Verticillium dahliae VdLs.17]	2e-105 ref|XM_003004184.1| Verticillium albo-atrum VaMs.102 necrosis- and ethylene-inducing protein, mRNA	7e-06 gnl|CDD|218665 pfam05630, NPP1, Necrosis inducing protein (NPP1). This family consists of several NPP1 like necrosis inducing proteins from oomycetes, fungi and bacteria. Infiltration of NPP1 into leaves of Arabidopsis thaliana plants result in transcript accumulation of pathogenesis-related (PR) genes, production of ROS and ethylene, callose apposition, and HR-like cell death.	-	3e-39 tr|G2XA90|G2XA90_VERDV Necrosis-and ethylene-inducing protein OS=Verticillium dahliae (strain VdLs.17 / ATCC MYA-4575 / FGSC 10137) GN=VDAG_06993 PE=4 SV=1	-	-
c1653_g1	622.684	97.3816	1147.99	11.7885	3.55931	1.08e-12	7.09e-12	13	154.68	-	-	2e-29 gnl|CDD|223560 COG0484, DnaJ, DnaJ-class molecular chaperone with C-terminal Zn finger domain [Posttranslational modification, protein turnover, chaperones].	4e-28 gnl|CDD|228659 KOG0712, KOG0712, KOG0712, Molecular chaperone (DnaJ superfamily) [Posttranslational modification, protein turnover, chaperones].	2e-40 gb|EGY18155.1| psi1 [Verticillium dahliae VdLs.17]	0.0 ref|XM_003008478.1| Verticillium albo-atrum VaMs.102 psi1, mRNA	1e-27 gnl|CDD|215804 pfam00226, DnaJ, DnaJ domain. DnaJ domains (J-domains) are associated with hsp70 heat-shock system and it is thought that this domain mediates the interaction. DnaJ-domain is therefore part of a chaperone (protein folding) system. The T-antigens, although not in Prosite are confirmed as DnaJ containing domains from literature.	2e-19 sp|P25294|SIS1_YEAST Protein SIS1 OS=Saccharomyces cerevisiae (strain ATCC 204508 / S288c) GN=SIS1 PE=1 SV=1	2e-40 tr|G2XEA7|G2XEA7_VERDV Psi1 OS=Verticillium dahliae (strain VdLs.17 / ATCC MYA-4575 / FGSC 10137) GN=VDAG_08489 PE=4 SV=1	GO:0006457,protein folding;GO:0006413,translational initiation;GO:0003677,DNA binding;GO:0005634,nucleus;GO:0051082,unfolded protein binding;GO:0022627,cytosolic small ribosomal subunit;GO:0007049,cell cycle	-
c1655_g1	159.591	260.138	59.0436	0.22697	-2.13943	5.49e-43	9.13e-42	13.43	3.06	-	-	3e-58 gnl|CDD|215689 pfam00067, p450, Cytochrome P450. Cytochrome P450s are haem-thiolate proteins involved in the oxidative degradation of various compounds. They are particularly well known for their role in the degradation of environmental toxins and mutagens. They can be divided into 4 classes, according to the method by which electrons from NAD(P)H are delivered to the catalytic site. Sequen…	2e-70 gnl|CDD|228107 KOG0157, KOG0157, KOG0157, Cytochrome P450 CYP4/CYP19/CYP26 subfamilies [Secondary metabolites biosynthesis, transport and catabolism, Lipid transport and metabolism].	0.0 gb|EGY16348.1| cytochrome P450 52A11 [Verticillium dahliae VdLs.17]	0.0 ref|XM_003004411.1| Verticillium albo-atrum VaMs.102 cytochrome P450 52A11, mRNA	6e-59 gnl|CDD|215689 pfam00067, p450, Cytochrome P450. Cytochrome P450s are haem-thiolate proteins involved in the oxidative degradation of various compounds. They are particularly well known for their role in the degradation of environmental toxins and mutagens. They can be divided into 4 classes, according to the method by which electrons from NAD(P)H are delivered to the catalytic site. Sequen…	1e-78 sp|Q9Y757|CP52L_DEBHN Cytochrome P450 52A12 OS=Debaryomyces hansenii GN=CYP52A12 PE=2 SV=2	0.0 tr|G2XBI0|G2XBI0_VERDV Cytochrome P450 52A11 OS=Verticillium dahliae (strain VdLs.17 / ATCC MYA-4575 / FGSC 10137) GN=VDAG_07512 PE=3 SV=1	GO:0016020,membrane;GO:0009055,electron carrier activity;GO:0020037,heme binding;GO:0004497,monooxygenase activity;GO:0005506,iron ion binding;GO:0016705,oxidoreductase activity, acting on paired donors, with incorporation or reduction of molecular oxygen;GO:0016712,oxidoreductase activity, acting on paired donors, with incorporation or reduction of molecular oxygen, reduced flavin or flavoprotei…	-
c16569_g1	4.11063	0	8.22126	Inf	Inf	0.000275807	0.00083791	0	2.82	VDBG_02462	hypothetical protein	-	-	2e-07 ref|XP_003008274.1| predicted protein [Verticillium alfalfae VaMs.102] gb|EEY16353.1| predicted protein [Verticillium alfalfae VaMs.102]	-	-	-	2e-07 tr|C9SAR4|C9SAR4_VERA1 Predicted protein OS=Verticillium albo-atrum (strain VaMs.102 / ATCC MYA-4576 / FGSC 10136) GN=VDBG_02462 PE=4 SV=1	-	-
c16570_g1	21.6827	7.49089	35.8746	4.78909	2.25975	1.18e-07	4.83e-07	0.59	2.86	-	-	-	-	2e-143 gb|EGY17986.1| hypothetical protein VDAG_08320 [Verticillium dahliae VdLs.17]	0.0 ref|XM_003008305.1| Verticillium albo-atrum VaMs.102 predicted protein, mRNA	-	-	2e-143 tr|G2XDT8|G2XDT8_VERDV Putative uncharacterized protein OS=Verticillium dahliae (strain VdLs.17 / ATCC MYA-4575 / FGSC 10137) GN=VDAG_08320 PE=4 SV=1	-	-
c16613_g1	43.8651	66.056	21.6742	0.328119	-1.60771	1.34e-08	5.88e-08	31.3	10.55	-	-	-	-	-	-	-	-	-	-	-
c1663_g1	15172.5	1590.79	28754.2	18.0754	4.17596	1.36e-11	7.85e-11	87.31	1585.44	-	-	1e-21 gnl|CDD|203602 pfam07249, Cerato-platanin, Cerato-platanin. This family contains a number of fungal cerato-platanin phytotoxic proteins approximately 150 residues long. Cerato-platanin contains four cysteine residues that form two disulphide bonds.	-	2e-44 gb|EJT76087.1| SnodProt1, partial [Gaeumannomyces graminis var. tritici R3-111a-1]	4e-102 ref|XM_002999825.1| Verticillium albo-atrum VaMs.102 SnodProt1, mRNA	3e-22 gnl|CDD|203602 pfam07249, Cerato-platanin, Cerato-platanin. This family contains a number of fungal cerato-platanin phytotoxic proteins approximately 150 residues long. Cerato-platanin contains four cysteine residues that form two disulphide bonds.	7e-35 sp|O74238|SNP1_PHANO Protein SnodProt1 OS=Phaeosphaeria nodorum (strain SN15 / ATCC MYA-4574 / FGSC 10173) GN=SNOG_13722 PE=2 SV=1	4e-45 tr|M4FVV8|M4FVV8_MAGP6 Uncharacterized protein OS=Magnaporthe poae (strain ATCC 64411 / 73-15) PE=4 SV=1	GO:0005576,extracellular region	-
c1667_g2	1152.85	720.488	1585.21	2.20019	1.13763	0	0	33.45	73.56	-	-	4e-40 gnl|CDD|216125 pfam00797, Acetyltransf_2, N-acetyltransferase. Arylamine N-acetyltransferase (NAT) is a cytosolic enzyme of approximately 30kDa. It facilitates the transfer of an acetyl group from Acetyl Coenzyme A on to a wide range of arylamine, N-hydroxyarylamines and hydrazines. Acetylation of these compounds generally results in inactivation. NAT is found in many species from Mycobacte…	-	0.0 tpe|CBL43326.1| TPA: arylamine N-acetyltransferase 1 [Verticillium dahliae] gb|EGY19523.1| hypothetical protein VDAG_09857 [Verticillium dahliae VdLs.17]	0.0 tpe|BN001420.1| TPA_inf: Verticillium dahliae nat1 gene for arylamine N-acetyltransferase 1, strain VdLs.17, exon 1	8e-41 gnl|CDD|216125 pfam00797, Acetyltransf_2, N-acetyltransferase. Arylamine N-acetyltransferase (NAT) is a cytosolic enzyme of approximately 30kDa. It facilitates the transfer of an acetyl group from Acetyl Coenzyme A on to a wide range of arylamine, N-hydroxyarylamines and hydrazines. Acetylation of these compounds generally results in inactivation. NAT is found in many species from Mycobacte…	4e-15 sp|P50293|ARY2_MESAU Arylamine N-acetyltransferase 2 OS=Mesocricetus auratus GN=NAT2 PE=2 SV=1	0.0 tr|G2XI75|G2XI75_VERDV Putative uncharacterized protein OS=Verticillium dahliae (strain VdLs.17 / ATCC MYA-4575 / FGSC 10137) GN=VDAG_09857 PE=3 SV=1	GO:0004060,arylamine N-acetyltransferase activity;GO:0005737,cytoplasm;GO:0016407,acetyltransferase activity	-
c16707_g1	4.11063	0	8.22126	Inf	Inf	0.000275807	0.00083791	0	2.8	-	-	-	-	-	-	-	-	-	-	-
c1671_g1	5652.28	533.215	10771.3	20.2007	4.33634	0	0	23	465.67	-	-	5e-15 gnl|CDD|201070 pfam00191, Annexin, Annexin. This family of annexins also includes giardin that has been shown to function as an annexin.	9e-57 gnl|CDD|228765 KOG0819, KOG0819, KOG0819, Annexin [Intracellular trafficking, secretion, and vesicular transport].	0.0 gb|EGY21941.1| annexin-B11 [Verticillium dahliae VdLs.17]	0.0 ref|XM_003003739.1| Verticillium albo-atrum VaMs.102 annexin-B9, mRNA	1e-15 gnl|CDD|201070 pfam00191, Annexin, Annexin. This family of annexins also includes giardin that has been shown to function as an annexin.	2e-44 sp|P20073|ANXA7_HUMAN Annexin A7 OS=Homo sapiens GN=ANXA7 PE=1 SV=3	0.0 tr|G2WZD9|G2WZD9_VERDV Annexin OS=Verticillium dahliae (strain VdLs.17 / ATCC MYA-4575 / FGSC 10137) GN=VDAG_03381 PE=3 SV=1	GO:0031982,vesicle;GO:0007599,hemostasis;GO:0035176,social behavior;GO:0009992,cellular water homeostasis;GO:0008360,regulation of cell shape;GO:0005544,calcium-dependent phospholipid binding;GO:0005635,nuclear envelope;GO:0008283,cell proliferation;GO:0005829,cytosol;GO:0009651,response to salt stress;GO:0006874,cellular calcium ion homeostasis;GO:0005886,plasma membrane;GO:0005509,calcium ion b…	K17095
c16711_g1	4.76693	9.53386	0	0	#NAME?	0.000120662	0.000380171	5.16	0	-	-	-	-	-	-	-	-	-	-	-
c16713_g1	5.44792	10.8958	0	0	#NAME?	3.3e-05	0.000110882	1.47	0	VDBG_06250	cation diffusion facilitator 1	4e-24 gnl|CDD|216561 pfam01545, Cation_efflux, Cation efflux family. Members of this family are integral membrane proteins, that are found to increase tolerance to divalent metal ions such as cadmium, zinc, and cobalt. These proteins are thought to be efflux pumps that remove these ions from cells.	6e-57 gnl|CDD|229426 KOG1485, KOG1485, KOG1485, Mitochondrial Fe2+ transporter MMT1 and related transporters (cation diffusion facilitator superfamily) [Inorganic ion transport and metabolism].	1e-168 ref|XP_003003808.1| cation diffusion facilitator 1 [Verticillium alfalfae VaMs.102] gb|EEY20141.1| cation diffusion facilitator 1 [Verticillium alfalfae VaMs.102]	0.0 ref|XM_003003762.1| Verticillium albo-atrum VaMs.102 cation diffusion facilitator 1, mRNA	8e-25 gnl|CDD|216561 pfam01545, Cation_efflux, Cation efflux family. Members of this family are integral membrane proteins, that are found to increase tolerance to divalent metal ions such as cadmium, zinc, and cobalt. These proteins are thought to be efflux pumps that remove these ions from cells.	4e-42 sp|Q6Z7K5|MTP3_ORYSJ Metal tolerance protein 3 OS=Oryza sativa subsp. japonica GN=MTP3 PE=2 SV=1	2e-168 tr|C9SMX6|C9SMX6_VERA1 Cation diffusion facilitator 1 OS=Verticillium albo-atrum (strain VaMs.102 / ATCC MYA-4576 / FGSC 10136) GN=VDBG_06250 PE=4 SV=1	GO:0016021,integral to membrane;GO:0005774,vacuolar membrane;GO:0008324,cation transmembrane transporter activity	-
c16723_g1	19.026	31.3255	6.72648	0.214728	-2.21942	1.45e-06	5.49e-06	18.28	4.05	-	-	-	-	6e-24 gb|EGY18221.1| hypothetical protein VDAG_08555 [Verticillium dahliae VdLs.17]	4e-75 ref|XM_003008546.1| Verticillium albo-atrum VaMs.102 conserved hypothetical protein, mRNA	-	-	6e-24 tr|G2XEH0|G2XEH0_VERDV Putative uncharacterized protein OS=Verticillium dahliae (strain VdLs.17 / ATCC MYA-4575 / FGSC 10137) GN=VDAG_08555 PE=4 SV=1	-	-
c16725_g1	8.18806	0.68099	15.6951	23.0475	4.52654	2.09e-06	7.84e-06	0.2	4.81	VDBG_10079	alpha-glucosidase	1e-26 gnl|CDD|200472 cd11333, AmyAc_SI_OligoGlu_DGase, Alpha amylase catalytic domain found in Sucrose isomerases, oligo-1,6-glucosidase (also called isomaltase; sucrase-isomaltase; alpha-limit dextrinase), dextran glucosidase (also called glucan 1,6-alpha-glucosidase), and related proteins. The sucrose isomerases (SIs) Isomaltulose synthase (EC 5.4.99.11) and Trehalose synthase (EC 5.4.99.16) ca…	3e-16 gnl|CDD|228420 KOG0471, KOG0471, KOG0471, Alpha-amylase [Carbohydrate transport and metabolism].	5e-34 ref|XP_002999785.1| alpha-glucosidase [Verticillium alfalfae VaMs.102] gb|EEY23969.1| alpha-glucosidase [Verticillium alfalfae VaMs.102]	8e-79 ref|XM_002999739.1| Verticillium albo-atrum VaMs.102 alpha-glucosidase, mRNA	1e-06 gnl|CDD|215737 pfam00128, Alpha-amylase, Alpha amylase, catalytic domain. Alpha amylase is classified as family 13 of the glycosyl hydrolases. The structure is an 8 stranded alpha/beta barrel containing the active site, interrupted by a ~70 a.a. calcium-binding domain protruding between beta strand 3 and alpha helix 3, and a carboxyl-terminal Greek key beta-barrel domain.	7e-14 sp|P38158|MAL32_YEAST Alpha-glucosidase MAL32 OS=Saccharomyces cerevisiae (strain ATCC 204508 / S288c) GN=MAL32 PE=1 SV=1	6e-34 tr|C9SYV4|C9SYV4_VERA1 Alpha-glucosidase OS=Verticillium albo-atrum (strain VaMs.102 / ATCC MYA-4576 / FGSC 10136) GN=VDBG_10079 PE=4 SV=1	GO:0032450,maltose alpha-glucosidase activity;GO:0004575,sucrose alpha-glucosidase activity;GO:0003824,catalytic activity;GO:0043169,cation binding;GO:0000025,maltose catabolic process;GO:0005975,carbohydrate metabolic process;GO:0005886,plasma membrane;GO:0005987,sucrose catabolic process	-
c16732_g1	36.2746	53.1172	19.4321	0.365833	-1.45074	2.38e-06	8.87e-06	11.27	4.18	-	-	-	-	-	-	-	-	-	-	-
c16809_g1	16.7175	32.6875	0.747387	0.0228646	-5.45074	8.02e-13	5.32e-12	9.68	0.23	-	-	-	-	4e-10 gb|EMD70251.1| hypothetical protein COCSADRAFT_32862 [Bipolaris sorokiniana ND90Pr]	-	-	-	5e-10 tr|M2TM22|M2TM22_COCSA Uncharacterized protein OS=Bipolaris sorokiniana ND90Pr GN=COCSADRAFT_32862 PE=4 SV=1	-	-
c1682_g1	21.4835	11.5768	31.3902	2.71147	1.43908	0.000284001	0.000861829	1.06	2.91	-	-	6e-15 gnl|CDD|222206 pfam13535, ATP-grasp_4, ATP-grasp domain. This family includes a diverse set of enzymes that possess ATP-dependent carboxylate-amine ligase activity.	-	0.0 gb|EGY21907.1| hypothetical protein VDAG_03347 [Verticillium dahliae VdLs.17]	0.0 ref|XM_003003709.1| Verticillium albo-atrum VaMs.102 conserved hypothetical protein, mRNA	1e-15 gnl|CDD|222206 pfam13535, ATP-grasp_4, ATP-grasp domain. This family includes a diverse set of enzymes that possess ATP-dependent carboxylate-amine ligase activity.	7e-07 sp|Q7MWA2|DDL_PORGI D-alanine--D-alanine ligase OS=Porphyromonas gingivalis (strain ATCC BAA-308 / W83) GN=ddl PE=3 SV=1	0.0 tr|G2WZA5|G2WZA5_VERDV Putative uncharacterized protein OS=Verticillium dahliae (strain VdLs.17 / ATCC MYA-4575 / FGSC 10137) GN=VDAG_03347 PE=4 SV=1	GO:0005737,cytoplasm;GO:0009252,peptidoglycan biosynthetic process;GO:0008716,D-alanine-D-alanine ligase activity;GO:0008360,regulation of cell shape;GO:0005524,ATP binding;GO:0046872,metal ion binding;GO:0005618,cell wall	-
c169_g1	1538.32	2057.95	1018.69	0.495001	-1.0145	2e-110	5.26e-109	50.87	25.22	-	-	3e-35 gnl|CDD|240691 cd12245, RRM_scw1_like, RNA recognition motif in yeast cell wall integrity protein scw1 and similar proteins. This subfamily corresponds to the RRM of the family including yeast cell wall integrity protein scw1, yeast Whi3 protein, yeast Whi4 protein and similar proteins. The strong cell wall protein 1, scw1, is a nonessential cytoplasmic RNA-binding protein that regulates se…	6e-11 gnl|CDD|229398 KOG1457, KOG1457, KOG1457, RNA binding protein (contains RRM repeats) [General function prediction only].	0.0 gb|EGY21041.1| RNA binding protein [Verticillium dahliae VdLs.17]	0.0 ref|XM_003007866.1| Verticillium albo-atrum VaMs.102 RNA binding protein, mRNA	3e-10 gnl|CDD|215696 pfam00076, RRM_1, RNA recognition motif. (a.k.a. RRM, RBD, or RNP domain). The RRM motif is probably diagnostic of an RNA binding protein. RRMs are found in a variety of RNA binding proteins, including various hnRNP proteins, proteins implicated in regulation of alternative splicing, and protein components of snRNPs. The motif also appears in a few single stranded DNA binding…	2e-37 sp|O74452|SCW1_SCHPO Cell wall integrity protein scw1 OS=Schizosaccharomyces pombe (strain 972 / ATCC 24843) GN=scw1 PE=1 SV=1	0.0 tr|G2WY83|G2WY83_VERDV RNA binding protein OS=Verticillium dahliae (strain VdLs.17 / ATCC MYA-4575 / FGSC 10137) GN=VDAG_02565 PE=4 SV=1	GO:0005737,cytoplasm;GO:0032955,regulation of barrier septum assembly;GO:0032995,regulation of fungal-type cell wall biogenesis;GO:0003723,RNA binding;GO:0000166,nucleotide binding;GO:0003676,nucleic acid binding	-
c1697_g1	572.782	937.042	208.521	0.222531	-2.16792	7.16e-153	2.12e-151	75.74	16.94	-	-	3e-43 gnl|CDD|187569 cd05259, PCBER_SDR_a, phenylcoumaran benzylic ether reductase (PCBER) like, atypical (a) SDRs. PCBER and pinoresinol-lariciresinol reductases are NADPH-dependent aromatic alcohol reductases, and are atypical members of the SDR family. Other proteins in this subgroup are identified as eugenol synthase. These proteins contain an N-terminus characteristic of NAD(P)-binding prote…	2e-07 gnl|CDD|229145 KOG1203, KOG1203, KOG1203, Predicted dehydrogenase [Carbohydrate transport and metabolism].	0.0 gb|EGY23694.1| isoflavone reductase family protein [Verticillium dahliae VdLs.17]	0.0 ref|XM_003002981.1| Verticillium albo-atrum VaMs.102 isoflavone reductase family protein, mRNA	3e-21 gnl|CDD|191263 pfam05368, NmrA, NmrA-like family. NmrA is a negative transcriptional regulator involved in the post-translational modification of the transcription factor AreA. NmrA is part of a system controlling nitrogen metabolite repression in fungi. This family only contains a few sequences as iteration results in significant matches to other Rossmann fold families.	8e-14 sp|Q9FVQ6|PILR1_ARATH Pinoresinol reductase 1 OS=Arabidopsis thaliana GN=PRR1 PE=1 SV=1	0.0 tr|G2X4Q0|G2X4Q0_VERDV Isoflavone reductase family protein OS=Verticillium dahliae (strain VdLs.17 / ATCC MYA-4575 / FGSC 10137) GN=VDAG_05132 PE=4 SV=1	GO:0010283,pinoresinol reductase activity;GO:0000166,nucleotide binding;GO:0009807,lignan biosynthetic process	-
c16988_g1	6.31959	0.68099	11.9582	17.56	4.13422	6.72e-05	0.000218278	0.35	6.33	-	-	-	-	-	-	-	-	-	-	-
c17_g2	72297.6	101669	42926.2	0.422214	-1.24395	0	0	1669.92	705.67	VDBG_07574	hypothetical protein	1e-133 gnl|CDD|225428 COG2873, MET17, O-acetylhomoserine sulfhydrylase [Amino acid transport and metabolism].	3e-76 gnl|CDD|228004 KOG0053, KOG0053, KOG0053, Cystathionine beta-lyases/cystathionine gamma-synthases [Amino acid transport and metabolism].	0.0 ref|XP_003002115.1| conserved hypothetical protein [Verticillium alfalfae VaMs.102] gb|EEY21464.1| conserved hypothetical protein [Verticillium alfalfae VaMs.102]	0.0 ref|XM_003002069.1| Verticillium albo-atrum VaMs.102 conserved hypothetical protein, mRNA	4e-109 gnl|CDD|216267 pfam01053, Cys_Met_Meta_PP, Cys/Met metabolism PLP-dependent enzyme. This family includes enzymes involved in cysteine and methionine metabolism. The following are members: Cystathionine gamma-lyase, Cystathionine gamma-synthase, Cystathionine beta-lyase, Methionine gamma-lyase, OAH/OAS sulfhydrylase, O-succinylhomoserine sulfhydrylase All of these members participate is sli…	1e-107 sp|P50125|CYSD_EMENI O-acetylhomoserine (thiol)-lyase OS=Emericella nidulans (strain FGSC A4 / ATCC 38163 / CBS 112.46 / NRRL 194 / M139) GN=cysD PE=2 SV=2	0.0 tr|C9SRP9|C9SRP9_VERA1 Putative uncharacterized protein OS=Verticillium albo-atrum (strain VaMs.102 / ATCC MYA-4576 / FGSC 10136) GN=VDBG_07574 PE=4 SV=1	GO:0003961,O-acetylhomoserine aminocarboxypropyltransferase activity;GO:0030170,pyridoxal phosphate binding;GO:0008152,metabolic process;GO:0003824,catalytic activity;GO:0019344,cysteine biosynthetic process;GO:0005524,ATP binding;GO:0071266,'de novo' L-methionine biosynthetic process;GO:0046872,metal ion binding	-
c1703_g1	36.7471	20.4297	53.0645	2.59742	1.37708	4.67e-06	1.7e-05	1.04	2.71	-	-	3e-06 gnl|CDD|221718 pfam12695, Abhydrolase_5, Alpha/beta hydrolase family. This family contains a diverse range of alpha/beta hydrolase enzymes.	5e-12 gnl|CDD|229493 KOG1552, KOG1552, KOG1552, Predicted alpha/beta hydrolase [General function prediction only].	6e-134 gb|EGY14248.1| abhydrolase domain-containing protein 12B [Verticillium dahliae VdLs.17]	0.0 ref|XM_003001542.1| Verticillium albo-atrum VaMs.102 abhydrolase domain-containing protein, mRNA	7e-07 gnl|CDD|221718 pfam12695, Abhydrolase_5, Alpha/beta hydrolase family. This family contains a diverse range of alpha/beta hydrolase enzymes.	2e-10 sp|Q8Z4M8|YHFR_SALTI Uncharacterized protein YfhR OS=Salmonella typhi GN=yhfR PE=3 SV=1	7e-134 tr|G2X5A7|G2X5A7_VERDV Abhydrolase domain-containing protein 12B OS=Verticillium dahliae (strain VdLs.17 / ATCC MYA-4575 / FGSC 10137) GN=VDAG_05412 PE=4 SV=1	GO:0016787,hydrolase activity;GO:0016021,integral to membrane	K13704
c1705_g1	23.2771	5.44792	41.1063	7.54531	2.91558	5.49e-11	2.96e-10	0.43	3.19	-	-	-	-	0.0 gb|EGY23830.1| hypothetical protein VDAG_05268 [Verticillium dahliae VdLs.17]	0.0 ref|XM_002999643.1| Verticillium albo-atrum VaMs.102 predicted protein, mRNA	-	-	0.0 tr|G2X536|G2X536_VERDV Putative uncharacterized protein OS=Verticillium dahliae (strain VdLs.17 / ATCC MYA-4575 / FGSC 10137) GN=VDAG_05268 PE=4 SV=1	-	-
c171_g1	242.545	344.581	140.509	0.407767	-1.29418	1.44e-28	1.78e-27	8.91	3.64	VDBG_01080	hypothetical protein	2e-26 gnl|CDD|221663 pfam12612, TFCD_C, Tubulin folding cofactor D C terminal. This domain family is found in eukaryotes, and is typically between 182 and 199 amino acids in length. The family is found in association with pfam02985. There is a single completely conserved residue R that may be functionally important. Tubulin folding cofactor D does not co-polymerise with microtubules either in viv…	4e-12 gnl|CDD|229882 KOG1943, KOG1943, KOG1943, Beta-tubulin folding cofactor D [Posttranslational modification, protein turnover, chaperones].	0.0 ref|XP_003009397.1| conserved hypothetical protein [Verticillium alfalfae VaMs.102] gb|EEY14971.1| conserved hypothetical protein [Verticillium alfalfae VaMs.102]	0.0 ref|XM_003009351.1| Verticillium albo-atrum VaMs.102 conserved hypothetical protein, mRNA	5e-27 gnl|CDD|221663 pfam12612, TFCD_C, Tubulin folding cofactor D C terminal. This domain family is found in eukaryotes, and is typically between 182 and 199 amino acids in length. The family is found in association with pfam02985. There is a single completely conserved residue R that may be functionally important. Tubulin folding cofactor D does not co-polymerise with microtubules either in viv…	2e-07 sp|Q9BTW9|TBCD_HUMAN Tubulin-specific chaperone D OS=Homo sapiens GN=TBCD PE=1 SV=2	0.0 tr|C9S8Z8|C9S8Z8_VERA1 Putative uncharacterized protein OS=Verticillium albo-atrum (strain VaMs.102 / ATCC MYA-4576 / FGSC 10136) GN=VDBG_01080 PE=4 SV=1	GO:0005874,microtubule;GO:0005737,cytoplasm;GO:0048487,beta-tubulin binding;GO:0031115,negative regulation of microtubule polymerization;GO:0005912,adherens junction;GO:0070830,tight junction assembly;GO:0007023,post-chaperonin tubulin folding pathway;GO:0051084,'de novo' posttranslational protein folding;GO:0051087,chaperone binding;GO:0005923,tight junction;GO:0016328,lateral plasma membrane;GO…	-
c1710_g1	1043.48	1453.91	633.037	0.435402	-1.19958	2.35e-102	6.01e-101	53.8	23.48	VDBG_05975	PRO41 protein	-	-	8e-90 ref|XP_003003533.1| PRO41 protein [Verticillium alfalfae VaMs.102] gb|EEY19866.1| PRO41 protein [Verticillium alfalfae VaMs.102] gb|EGY21695.1| PRO41 protein [Verticillium dahliae VdLs.17]	0.0 ref|XM_003003487.1| Verticillium albo-atrum VaMs.102 PRO41 protein, mRNA	-	-	9e-90 tr|G2WYP3|G2WYP3_VERDV PRO41 protein OS=Verticillium dahliae (strain VdLs.17 / ATCC MYA-4575 / FGSC 10137) GN=VDAG_03135 PE=4 SV=1	-	-
c17133_g1	7.84756	0	15.6951	Inf	Inf	1.67e-07	6.76e-07	0	28.6	-	-	-	-	-	-	-	-	-	-	-
c172_g1	17.8377	2.04297	33.6324	16.4625	4.04111	8.91e-12	5.26e-11	0.43	7.22	-	-	-	-	-	-	-	-	-	-	-
c1726_g1	1190.1	1635.06	745.145	0.45573	-1.13375	3.59e-105	9.3e-104	71.24	32.55	-	-	7e-42 gnl|CDD|240965 cd12521, RRM3_MRN1, RNA recognition motif 3 of RNA-binding protein MRN1 and similar proteins. This subgroup corresponds to the RRM3 of MRN1, also termed multicopy suppressor of RSC-NHP6 synthetic lethality protein 1, or post-transcriptional regulator of 69 kDa, which is a RNA-binding protein found in yeast. Although its specific biological role remains unclear, MRN1 might be …	4e-11 gnl|CDD|228068 KOG0117, KOG0117, KOG0117, Heterogeneous nuclear ribonucleoprotein R (RRM superfamily) [RNA processing and modification].	0.0 gb|EGY14874.1| RNA recognition motif containing protein [Verticillium dahliae VdLs.17]	0.0 ref|XM_003000861.1| Verticillium albo-atrum VaMs.102 RNA recognition motif containing protein, mRNA	4e-09 gnl|CDD|215696 pfam00076, RRM_1, RNA recognition motif. (a.k.a. RRM, RBD, or RNP domain). The RRM motif is probably diagnostic of an RNA binding protein. RRMs are found in a variety of RNA binding proteins, including various hnRNP proteins, proteins implicated in regulation of alternative splicing, and protein components of snRNPs. The motif also appears in a few single stranded DNA binding…	5e-155 sp|Q09702|NRD1_SCHPO Negative regulator of differentiation 1 OS=Schizosaccharomyces pombe (strain 972 / ATCC 24843) GN=nrd1 PE=1 SV=1	0.0 tr|G2X7A6|G2X7A6_VERDV RNA recognition motif containing protein OS=Verticillium dahliae (strain VdLs.17 / ATCC MYA-4575 / FGSC 10137) GN=VDAG_06364 PE=4 SV=1	GO:0003729,mRNA binding;GO:0006355,regulation of transcription, DNA-dependent;GO:0031138,negative regulation of conjugation with cellular fusion;GO:0000166,nucleotide binding;GO:0005829,cytosol;GO:0006351,transcription, DNA-dependent;GO:0003676,nucleic acid binding	-
c1727_g1	1590.2	449.454	2730.95	6.07616	2.60316	1.39e-11	8.01e-11	15.9	96.81	-	-	2e-111 gnl|CDD|119365 cd06548, GH18_chitinase, The GH18 (glycosyl hydrolases, family 18) type II chitinases hydrolyze chitin, an abundant polymer of N-acetylglucosamine and have been identified in bacteria, fungi, insects, plants, viruses, and protozoan parasites. The structure of this domain is an eight-stranded alpha/beta barrel with a pronounced active-site cleft at the C-terminal end of the b…	3e-54 gnl|CDD|230745 KOG2806, KOG2806, KOG2806, Chitinase [Carbohydrate transport and metabolism].	0.0 gb|EGY22978.1| chitinase [Verticillium dahliae VdLs.17]	0.0 ref|XM_003005224.1| Verticillium albo-atrum VaMs.102 chitinase, mRNA	8e-79 gnl|CDD|216071 pfam00704, Glyco_hydro_18, Glycosyl hydrolases family 18.	6e-138 sp|P32470|CHI1_APHAL Chitinase 1 OS=Aphanocladium album GN=CHI1 PE=1 SV=2	0.0 tr|G2X292|G2X292_VERDV Chitinase OS=Verticillium dahliae (strain VdLs.17 / ATCC MYA-4575 / FGSC 10137) GN=VDAG_04416 PE=3 SV=1	GO:0006032,chitin catabolic process;GO:0004568,chitinase activity;GO:0043169,cation binding;GO:0005975,carbohydrate metabolic process;GO:0000272,polysaccharide catabolic process;GO:0005576,extracellular region	K01183-ko00520,Amino sugar and nucleotide sugar metabolism
c173_g1	23.9921	36.7735	11.2108	0.304861	-1.71378	1.02e-05	3.59e-05	2.03	0.63	-	-	-	-	7e-81 gb|EGY14677.1| hypothetical protein VDAG_05841 [Verticillium dahliae VdLs.17]	-	-	-	8e-81 tr|G2X6Q9|G2X6Q9_VERDV Putative uncharacterized protein OS=Verticillium dahliae (strain VdLs.17 / ATCC MYA-4575 / FGSC 10137) GN=VDAG_05841 PE=4 SV=1	-	-
c17335_g1	15.5623	2.72396	28.4007	10.4263	3.38215	5.77e-09	2.6e-08	1.35	14.44	-	-	-	-	-	-	-	-	-	-	-
c1745_g1	1054.25	650.346	1458.15	2.24212	1.16486	0	0	44.51	100.22	-	-	1e-09 gnl|CDD|203162 pfam05051, COX17, Cytochrome C oxidase copper chaperone (COX17). Cox17 is essential for the assembly of functional cytochrome c oxidase (CCO) and for delivery of copper ions to the mitochondrion for insertion into the enzyme in yeast. The structure of Cox17 shows the protein to have an unstructured N-terminal region followed by two helices and several unstructured C-terminal …	-	6e-43 gb|EGY23083.1| hypothetical protein VDAG_04521 [Verticillium dahliae VdLs.17]	4e-151 ref|XM_003005321.1| Verticillium albo-atrum VaMs.102 COX17 protein, mRNA	3e-10 gnl|CDD|203162 pfam05051, COX17, Cytochrome C oxidase copper chaperone (COX17). Cox17 is essential for the assembly of functional cytochrome c oxidase (CCO) and for delivery of copper ions to the mitochondrion for insertion into the enzyme in yeast. The structure of Cox17 shows the protein to have an unstructured N-terminal region followed by two helices and several unstructured C-terminal …	-	7e-43 tr|G2X2J7|G2X2J7_VERDV Putative uncharacterized protein OS=Verticillium dahliae (strain VdLs.17 / ATCC MYA-4575 / FGSC 10137) GN=VDAG_04521 PE=4 SV=1	-	-
c17471_g1	1546.76	2429.09	664.427	0.273529	-1.87023	0	0	69.06	18.92	-	-	1e-83 gnl|CDD|173790 cd04077, Peptidases_S8_PCSK9_ProteinaseK_like, Peptidase S8 family domain in ProteinaseK-like proteins. The peptidase S8 or Subtilase clan of proteases have a Asp/His/Ser catalytic triad that is not homologous to trypsin. This CD contains several members of this clan including: PCSK9 (Proprotein convertase subtilisin/kexin type 9), Proteinase_K, Proteinase_T, and other subtil…	1e-65 gnl|CDD|229096 KOG1153, KOG1153, KOG1153, Subtilisin-related protease/Vacuolar protease B [Posttranslational modification, protein turnover, chaperones].	0.0 gb|EGY15113.1| alkaline proteinase [Verticillium dahliae VdLs.17]	0.0 gb|AY356397.1| Verticillium dahliae strain Dvd-T5 subtilisin-like protease (VSP1) mRNA, complete cds	4e-34 gnl|CDD|215701 pfam00082, Peptidase_S8, Subtilase family. Subtilases are a family of serine proteases. They appear to have independently and convergently evolved an Asp/Ser/His catalytic triad, like that found in the trypsin serine proteases (see pfam00089). Structure is an alpha/beta fold containing a 7-stranded parallel beta sheet, order 2314567.	1e-113 sp|Q03420|ALP_HYPAT Alkaline proteinase OS=Hypocrea atroviridis GN=prb1 PE=1 SV=1	0.0 tr|G2X826|G2X826_VERDV Alkaline proteinase OS=Verticillium dahliae (strain VdLs.17 / ATCC MYA-4575 / FGSC 10137) GN=VDAG_05967 PE=3 SV=1	GO:0006508,proteolysis;GO:0043086,negative regulation of catalytic activity;GO:0005576,extracellular region;GO:0004252,serine-type endopeptidase activity	K18549
c17472_g1	9137.69	3109.4	15166	4.87746	2.28613	0	0	29.84	145.62	-	-	7e-93 gnl|CDD|206751 cd01858, NGP_1, A novel nucleolar GTP-binding protein, circularly permuted subfamily of the Ras GTPases. Autoantigen NGP-1 (Nucleolar G-protein gene 1) has been shown to localize in the nucleolus and nucleolar organizers in all cell types analyzed, which is indicative of a function in ribosomal assembly. NGP-1 and its homologs show a circular permutation of the GTPase signatu…	0.0 gnl|CDD|230362 KOG2423, KOG2423, KOG2423, Nucleolar GTPase [General function prediction only].	0.0 gb|EGY17424.1| ATP-binding cassette sub-family G member 2 [Verticillium dahliae VdLs.17]	0.0 ref|XM_003005880.1| Verticillium albo-atrum VaMs.102 ATP-binding cassette sub-family G member 2, mRNA	5e-60 gnl|CDD|220405 pfam09792, But2, Ubiquitin 3 binding protein But2 C-terminal domain. This family is of proteins conserved in yeasts. It binds to Uba3 and is involved in the NEDD8 signalling pathway. This family represents a presumed C-terminal domain.	0.0 sp|P25371|ADP1_YEAST Probable ATP-dependent permease OS=Saccharomyces cerevisiae (strain ATCC 204508 / S288c) GN=ADP1 PE=1 SV=2	0.0 tr|G2WTI3|G2WTI3_VERDV ATP-binding cassette sub-family G member 2 OS=Verticillium dahliae (strain VdLs.17 / ATCC MYA-4575 / FGSC 10137) GN=VDAG_01106 PE=4 SV=1	GO:0016020,membrane;GO:0005783,endoplasmic reticulum;GO:0016887,ATPase activity;GO:0005789,endoplasmic reticulum membrane;GO:0005524,ATP binding;GO:0016021,integral to membrane;GO:0042626,ATPase activity, coupled to transmembrane movement of substances;GO:0006200,ATP catabolic process	-
c17484_g1	41694.7	61986.4	21402.9	0.345284	-1.53415	0	0	1834.87	634.73	-	-	2e-80 gnl|CDD|223809 COG0738, FucP, Fucose permease [Carbohydrate transport and metabolism].	-	0.0 gb|EGY17017.1| L-fucose transporter [Verticillium dahliae VdLs.17]	0.0 ref|XM_003001426.1| Verticillium albo-atrum VaMs.102 L-fucose permease, mRNA	1e-10 gnl|CDD|219516 pfam07690, MFS_1, Major Facilitator Superfamily.	2e-40 sp|P0C105|GLUP_BRUAB Glucose/galactose transporter OS=Brucella abortus biovar 1 (strain 9-941) GN=gluP PE=3 SV=1	0.0 tr|G2XDE9|G2XDE9_VERDV L-fucose transporter OS=Verticillium dahliae (strain VdLs.17 / ATCC MYA-4575 / FGSC 10137) GN=VDAG_08181 PE=4 SV=1	GO:0009276,Gram-negative-bacterium-type cell wall;GO:0005354,galactose transmembrane transporter activity;GO:0005355,glucose transmembrane transporter activity;GO:0016021,integral to membrane;GO:0005886,plasma membrane	K02429
c17502_g1	24.0253	36.0925	11.9582	0.331321	-1.5937	3.3e-05	0.000110781	3.8	1.27	-	-	6e-38 gnl|CDD|217976 pfam04229, UPF0157, Uncharacterized protein family (UPF0157). This Uncharacterized protein family has been suggested to belong to the nucleotidyltransferase superfamily. This family is also known as GrpB.	-	8e-123 gb|EGY16468.1| GrpB domain-containing protein [Verticillium dahliae VdLs.17]	0.0 ref|XM_003004536.1| Verticillium albo-atrum VaMs.102 GrpB domain-containing protein, mRNA	1e-38 gnl|CDD|217976 pfam04229, UPF0157, Uncharacterized protein family (UPF0157). This Uncharacterized protein family has been suggested to belong to the nucleotidyltransferase superfamily. This family is also known as GrpB.	3e-25 sp|Q9KBN7|Y1888_BACHD UPF0157 protein BH1888 OS=Bacillus halodurans (strain ATCC BAA-125 / DSM 18197 / FERM 7344 / JCM 9153 / C-125) GN=BH1888 PE=3 SV=1	1e-122 tr|G2XBV0|G2XBV0_VERDV GrpB domain-containing protein OS=Verticillium dahliae (strain VdLs.17 / ATCC MYA-4575 / FGSC 10137) GN=VDAG_07632 PE=4 SV=1	-	-
c17505_g1	905.347	1336.1	474.591	0.355205	-1.49328	5.66e-131	1.58e-129	34.64	12.32	-	-	3e-49 gnl|CDD|220933 pfam11001, DUF2841, Protein of unknown function (DUF2841). This family of proteins with unknown function are all present in yeast.	-	0.0 gb|EGY14898.1| hypothetical protein VDAG_06388 [Verticillium dahliae VdLs.17]	0.0 ref|XM_003000885.1| Verticillium albo-atrum VaMs.102 conserved hypothetical protein, mRNA	6e-50 gnl|CDD|220933 pfam11001, DUF2841, Protein of unknown function (DUF2841). This family of proteins with unknown function are all present in yeast.	1e-15 sp|Q04608|YD124_YEAST Uncharacterized protein YDR124W OS=Saccharomyces cerevisiae (strain ATCC 204508 / S288c) GN=YDR124W PE=1 SV=1	0.0 tr|G2X7D0|G2X7D0_VERDV Putative uncharacterized protein OS=Verticillium dahliae (strain VdLs.17 / ATCC MYA-4575 / FGSC 10137) GN=VDAG_06388 PE=4 SV=1	-	-
c17511_g1	15753.2	22955.5	8550.85	0.372497	-1.4247	0	0	353.09	131.65	-	-	0.0 gnl|CDD|233208 TIGR00956, 3a01205, Pleiotropic Drug Resistance (PDR) Family protein. [Transport and binding proteins, Other].	0.0 gnl|CDD|228016 KOG0065, KOG0065, KOG0065, Pleiotropic drug resistance proteins (PDR1-15), ABC superfamily [Secondary metabolites biosynthesis, transport and catabolism].	0.0 gb|EGY18578.1| ABC transporter CDR4 [Verticillium dahliae VdLs.17]	0.0 emb|FN669166.1| Glomerella graminicola atr8 gene for putative ABC transporter, exons 1-2, isolate M2	2e-41 gnl|CDD|216273 pfam01061, ABC2_membrane, ABC-2 type transporter.	0.0 sp|P43071|CDR1_CANAX Multidrug resistance protein CDR1 OS=Candida albicans GN=CDR1 PE=3 SV=1	0.0 tr|G2XFI0|G2XFI0_VERDV ABC transporter CDR4 OS=Verticillium dahliae (strain VdLs.17 / ATCC MYA-4575 / FGSC 10137) GN=VDAG_09104 PE=3 SV=1	GO:0046677,response to antibiotic;GO:0046898,response to cycloheximide;GO:0005524,ATP binding;GO:0016021,integral to membrane;GO:0042626,ATPase activity, coupled to transmembrane movement of substances;GO:0006200,ATP catabolic process	-
c17515_g1	2508.94	4331.78	686.101	0.158388	-2.65847	0	0	236.42	37.57	-	-	8e-139 gnl|CDD|193498 cd03876, M28_SGAP_like, M28 Zn-peptidase Streptomyces griseus Aminopeptidase and similar proteins. Peptidase family M28; Streptomyces griseus Aminopeptidase (SGAP, Leucine aminopeptidase (LAP), aminopeptidase S, Mername-AA022 peptidase) subfamily. SGAP is a di-zinc exopeptidase with high preference towards large hydrophobic amino-terminal residues, with Leu being the most ef…	3e-28 gnl|CDD|230134 KOG2195, KOG2195, KOG2195, Transferrin receptor and related proteins containing the protease-associated (PA) domain [Posttranslational modification, protein turnover, chaperones, Inorganic ion transport and metabolism, General function prediction only].	0.0 gb|EGY22795.1| aminopeptidase Y [Verticillium dahliae VdLs.17]	0.0 ref|XM_003005039.1| Verticillium albo-atrum VaMs.102 aminopeptidase Y, mRNA	2e-38 gnl|CDD|218057 pfam04389, Peptidase_M28, Peptidase family M28.	4e-154 sp|C5FTZ6|LAP2_ARTOC Leucine aminopeptidase 2 OS=Arthroderma otae (strain ATCC MYA-4605 / CBS 113480) GN=LAP2 PE=3 SV=1	0.0 tr|G2X1Q9|G2X1Q9_VERDV Aminopeptidase Y OS=Verticillium dahliae (strain VdLs.17 / ATCC MYA-4575 / FGSC 10137) GN=VDAG_04233 PE=4 SV=1	GO:0016020,membrane;GO:0006508,proteolysis;GO:0009405,pathogenesis;GO:0008237,metallopeptidase activity;GO:0004177,aminopeptidase activity;GO:0005576,extracellular region;GO:0004571,mannosyl-oligosaccharide 1,2-alpha-mannosidase activity;GO:0005509,calcium ion binding	-
c17538_g1	2492.66	1185.6	3799.71	3.20488	1.68027	0	0	16.59	53.23	-	-	0.0 gnl|CDD|235432 PRK05367, PRK05367, glycine dehydrogenase; Provisional.	0.0 gnl|CDD|229979 KOG2040, KOG2040, KOG2040, Glycine dehydrogenase (decarboxylating) [Amino acid transport and metabolism].	0.0 gb|EGY21203.1| glycine dehydrogenase [Verticillium dahliae VdLs.17]	0.0 ref|XM_003008023.1| Verticillium albo-atrum VaMs.102 glycine dehydrogenase, mRNA	7e-169 gnl|CDD|216983 pfam02347, GDC-P, Glycine cleavage system P-protein. This family consists of Glycine cleavage system P-proteins EC:1.4.4.2 from bacterial, mammalian and plant sources. The P protein is part of the glycine decarboxylase multienzyme complex EC:2.1.2.10 (GDC) also annotated as glycine cleavage system or glycine synthase. GDC consists of four proteins P, H, L and T. The reaction…	0.0 sp|Q09785|GCSP_SCHPO Putative glycine dehydrogenase [decarboxylating], mitochondrial OS=Schizosaccharomyces pombe (strain 972 / ATCC 24843) GN=gcv2 PE=3 SV=2	0.0 tr|G2WWU8|G2WWU8_VERDV Glycine dehydrogenase OS=Verticillium dahliae (strain VdLs.17 / ATCC MYA-4575 / FGSC 10137) GN=VDAG_02727 PE=4 SV=1	GO:0005960,glycine cleavage complex;GO:0019464,glycine decarboxylation via glycine cleavage system;GO:0030170,pyridoxal phosphate binding;GO:0006546,glycine catabolic process;GO:0005739,mitochondrion;GO:0004375,glycine dehydrogenase (decarboxylating) activity	K00281-ko01200,Carbon metabolism;ko00260,Glycine, serine and threonine metabolism
c17541_g1	3378.13	131.431	6624.84	50.4054	5.65551	5.79e-13	3.89e-12	11.9	603.38	-	-	7e-155 gnl|CDD|239243 cd02933, OYE_like_FMN, Old yellow enzyme (OYE)-like FMN binding domain. OYE was the first flavin-dependent enzyme identified, however its true physiological role remains elusive to this day. Each monomer of OYE contains FMN as a non-covalently bound cofactor, uses NADPH as a reducing agent with oxygens, quinones, and alpha,beta-unsaturated aldehydes and ketones, and can act …	5e-84 gnl|CDD|228084 KOG0134, KOG0134, KOG0134, NADH:flavin oxidoreductase/12-oxophytodienoate reductase [Energy production and conversion, General function prediction only].	0.0 gb|EGY22582.1| NADPH dehydrogenase [Verticillium dahliae VdLs.17]	0.0 ref|XM_003006928.1| Verticillium albo-atrum VaMs.102 12-oxophytodienoate reductase, mRNA	3e-91 gnl|CDD|216083 pfam00724, Oxidored_FMN, NADH:flavin oxidoreductase / NADH oxidase family.	6e-98 sp|Q4WZ70|OYE3_ASPFU Chanoclavine-I aldehyde reductase OS=Neosartorya fumigata (strain ATCC MYA-4609 / Af293 / CBS 101355 / FGSC A1100) GN=fgaOx3 PE=1 SV=1	0.0 tr|G2X191|G2X191_VERDV NADPH dehydrogenase OS=Verticillium dahliae (strain VdLs.17 / ATCC MYA-4575 / FGSC 10137) GN=VDAG_04020 PE=4 SV=1	GO:0018548,pentaerythritol trinitrate reductase activity;GO:0052690,trichloro-p-hydroquinone reductive dehalogenase activity;GO:0010181,FMN binding;GO:0003959,NADPH dehydrogenase activity;GO:0016491,oxidoreductase activity	K00354
c17546_g1	1674.76	2570.74	778.777	0.302939	-1.7229	5.9e-307	2e-305	91.8	27.87	-	-	-	-	0.0 gb|EGY18140.1| hypothetical protein VDAG_08474 [Verticillium dahliae VdLs.17]	0.0 ref|XM_003008463.1| Verticillium albo-atrum VaMs.102 conserved hypothetical protein, mRNA	-	-	0.0 tr|G2XE92|G2XE92_VERDV Putative uncharacterized protein OS=Verticillium dahliae (strain VdLs.17 / ATCC MYA-4575 / FGSC 10137) GN=VDAG_08474 PE=4 SV=1	-	-
c17555_g1	343.954	525.724	162.183	0.308494	-1.69668	6.29e-63	1.29e-61	79.5	24.76	-	-	-	-	3e-85 gb|EGY16120.1| hypothetical protein VDAG_07284 [Verticillium dahliae VdLs.17]	4e-168 ref|XM_003000592.1| Verticillium albo-atrum VaMs.102 predicted protein, mRNA	-	-	3e-85 tr|G2XAK4|G2XAK4_VERDV Putative uncharacterized protein OS=Verticillium dahliae (strain VdLs.17 / ATCC MYA-4575 / FGSC 10137) GN=VDAG_07284 PE=4 SV=1	-	-
c17559_g1	11933.3	4519.73	19346.9	4.28053	2.09779	3.07e-10	1.52e-09	118	505.94	-	-	2e-15 gnl|CDD|224336 COG1418, COG1418, Predicted HD superfamily hydrolase [General function prediction only].	-	2e-117 gb|EGY18347.1| hypothetical protein VDAG_08681 [Verticillium dahliae VdLs.17]	0.0 ref|XM_003008658.1| Verticillium albo-atrum VaMs.102 conserved hypothetical protein, mRNA	7e-06 gnl|CDD|216815 pfam01966, HD, HD domain. HD domains are metal dependent phosphohydrolases.	1e-09 sp|P54168|YPGQ_BACSU Uncharacterized protein YpgQ OS=Bacillus subtilis (strain 168) GN=ypgQ PE=4 SV=1	2e-117 tr|G2XEU6|G2XEU6_VERDV Putative uncharacterized protein OS=Verticillium dahliae (strain VdLs.17 / ATCC MYA-4575 / FGSC 10137) GN=VDAG_08681 PE=4 SV=1	GO:0008152,metabolic process;GO:0046872,metal ion binding;GO:0008081,phosphoric diester hydrolase activity	K06950
c17569_g1	387.26	518.915	255.606	0.492579	-1.02157	1.85e-29	2.35e-28	18.45	9.11	-	-	-	-	0.0 gb|EGY23193.1| hypothetical protein VDAG_04631 [Verticillium dahliae VdLs.17]	0.0 ref|XM_003000153.1| Verticillium albo-atrum VaMs.102 conserved hypothetical protein, mRNA	-	-	0.0 tr|G2X3P4|G2X3P4_VERDV Putative uncharacterized protein OS=Verticillium dahliae (strain VdLs.17 / ATCC MYA-4575 / FGSC 10137) GN=VDAG_04631 PE=4 SV=1	-	-
c17584_g1	3260.93	6077.16	444.695	0.0731749	-3.77251	0	0	230.43	16.9	-	-	2e-29 gnl|CDD|221610 pfam12505, DUF3712, Protein of unknown function (DUF3712). This domain family is found in eukaryotes, and is approximately 130 amino acids in length.	-	0.0 gb|EGY22914.1| hypothetical protein VDAG_04352 [Verticillium dahliae VdLs.17]	0.0 ref|XM_003005160.1| Verticillium albo-atrum VaMs.102 conserved hypothetical protein, mRNA	4e-30 gnl|CDD|221610 pfam12505, DUF3712, Protein of unknown function (DUF3712). This domain family is found in eukaryotes, and is approximately 130 amino acids in length.	-	0.0 tr|G2X228|G2X228_VERDV Putative uncharacterized protein OS=Verticillium dahliae (strain VdLs.17 / ATCC MYA-4575 / FGSC 10137) GN=VDAG_04352 PE=4 SV=1	-	-
c17585_g1	1693	2303.79	1082.22	0.469755	-1.09002	1.8e-138	5.12e-137	65.5	30.82	-	-	1e-19 gnl|CDD|238073 cd00127, DSPc, Dual specificity phosphatases (DSP); Ser/Thr and Tyr protein phosphatases. Structurally similar to tyrosine-specific phosphatases but with a shallower active site cleft and a distinctive active site signature motif, HCxxGxxR. Characterized as VHR- or Cdc25-like.	1e-18 gnl|CDD|229656 KOG1716, KOG1716, KOG1716, Dual specificity phosphatase [Defense mechanisms].	0.0 gb|EGY15007.1| tyrosine-protein phosphatase pmp1 [Verticillium dahliae VdLs.17]	0.0 ref|XM_003000996.1| Verticillium albo-atrum VaMs.102 tyrosine-protein phosphatase pmp1, mRNA	4e-18 gnl|CDD|216117 pfam00782, DSPc, Dual specificity phosphatase, catalytic domain. Ser/Thr and Tyr protein phosphatases. The enzyme's tertiary fold is highly similar to that of tyrosine-specific phosphatases, except for a "recognition" region.	2e-24 sp|O13453|PMP1_SCHPO Tyrosine-protein phosphatase pmp1 OS=Schizosaccharomyces pombe (strain 972 / ATCC 24843) GN=pmp1 PE=3 SV=1	0.0 tr|G2X7N9|G2X7N9_VERDV Tyrosine-protein phosphatase pmp1 OS=Verticillium dahliae (strain VdLs.17 / ATCC MYA-4575 / FGSC 10137) GN=VDAG_06497 PE=4 SV=1	GO:0090028,positive regulation of pheromone-dependent signal transduction involved in conjugation with cellular fusion;GO:0017017,MAP kinase tyrosine/serine/threonine phosphatase activity;GO:0030644,cellular chloride ion homeostasis;GO:0032465,regulation of cytokinesis;GO:0008138,protein tyrosine/serine/threonine phosphatase activity;GO:0071472,cellular response to salt stress;GO:0035335,peptidyl…	K11240-ko04011,MAPK signaling pathway - yeast
c17590_g1	165.536	230.175	100.897	0.438351	-1.18984	2.25e-17	1.93e-16	11.04	4.86	-	-	-	-	0.0 gb|EGY17708.1| F-box domain-containing protein [Verticillium dahliae VdLs.17]	0.0 ref|XM_003006166.1| Verticillium albo-atrum VaMs.102 F-box domain-containing protein, mRNA	-	-	0.0 tr|G2WUB7|G2WUB7_VERDV F-box domain-containing protein OS=Verticillium dahliae (strain VdLs.17 / ATCC MYA-4575 / FGSC 10137) GN=VDAG_01390 PE=4 SV=1	-	-
c17592_g1	805.664	1119.55	491.781	0.439267	-1.18683	6.02e-78	1.37e-76	71.94	31.73	-	-	-	-	0.0 gb|EGY23682.1| hypothetical protein VDAG_05120 [Verticillium dahliae VdLs.17]	0.0 ref|XM_003002971.1| Verticillium albo-atrum VaMs.102 conserved hypothetical protein, mRNA	-	-	0.0 tr|G2X4N8|G2X4N8_VERDV Putative uncharacterized protein OS=Verticillium dahliae (strain VdLs.17 / ATCC MYA-4575 / FGSC 10137) GN=VDAG_05120 PE=4 SV=1	-	-
c17607_g1	34.3313	46.9883	21.6742	0.461268	-1.11632	0.000296722	0.000898743	1.98	0.91	-	-	6e-08 gnl|CDD|216618 pfam01636, APH, Phosphotransferase enzyme family. This family consists of bacterial antibiotic resistance proteins, which confer resistance to various aminoglycosides they include: aminoglycoside 3'-phosphotransferase or kanamycin kinase / neomycin-kanamycin phosphotransferase and streptomycin 3''-kinase or streptomycin 3''-phosphotransferase. The aminoglycoside phosphotransf…	-	0.0 gb|EGY20419.1| hypothetical protein VDAG_10048 [Verticillium dahliae VdLs.17]	0.0 ref|XM_003001851.1| Verticillium albo-atrum VaMs.102 predicted protein, mRNA	1e-08 gnl|CDD|216618 pfam01636, APH, Phosphotransferase enzyme family. This family consists of bacterial antibiotic resistance proteins, which confer resistance to various aminoglycosides they include: aminoglycoside 3'-phosphotransferase or kanamycin kinase / neomycin-kanamycin phosphotransferase and streptomycin 3''-kinase or streptomycin 3''-phosphotransferase. The aminoglycoside phosphotransf…	-	0.0 tr|G2XIS5|G2XIS5_VERDV Putative uncharacterized protein OS=Verticillium dahliae (strain VdLs.17 / ATCC MYA-4575 / FGSC 10137) GN=VDAG_10048 PE=4 SV=1	GO:0016772,transferase activity, transferring phosphorus-containing groups	-
c17616_g1	107.86	148.456	67.2648	0.453096	-1.14211	4.51e-11	2.45e-10	13.18	6.01	VDBG_01761	hypothetical protein	-	-	4e-58 ref|XP_003007573.1| predicted protein [Verticillium alfalfae VaMs.102] gb|EEY15652.1| predicted protein [Verticillium alfalfae VaMs.102]	8e-167 ref|XM_003007527.1| Verticillium albo-atrum VaMs.102 predicted protein, mRNA	-	-	5e-58 tr|C9SBB8|C9SBB8_VERA1 Predicted protein OS=Verticillium albo-atrum (strain VaMs.102 / ATCC MYA-4576 / FGSC 10136) GN=VDBG_01761 PE=4 SV=1	-	-
c17627_g1	620.457	350.029	890.885	2.54518	1.34777	6.35e-12	3.85e-11	8.3	21.16	-	-	7e-39 gnl|CDD|227566 COG5241, RAD10, Nucleotide excision repair endonuclease NEF1, RAD10 subunit [DNA replication, recombination, and repair].	8e-57 gnl|CDD|230780 KOG2841, KOG2841, KOG2841, Structure-specific endonuclease ERCC1-XPF, ERCC1 component [Replication, recombination and repair].	0.0 gb|EGY20453.1| hypothetical protein VDAG_10082 [Verticillium dahliae VdLs.17]	0.0 ref|XM_003001885.1| Verticillium albo-atrum VaMs.102 mating-type switching protein swi10, mRNA	1e-32 gnl|CDD|190768 pfam03834, Rad10, Binding domain of DNA repair protein Ercc1 (rad10/Swi10). Ercc1 and XPF (xeroderma pigmentosum group F-complementing protein) are two structure-specific endonucleases of a class of seven containing an ERCC4 domain. Together they form an obligate complex that functions primarily in nucleotide excision repair (NER), a versatile pathway able to detect and remov…	5e-67 sp|Q06182|SWI10_SCHPO Mating-type switching protein swi10 OS=Schizosaccharomyces pombe (strain 972 / ATCC 24843) GN=swi10 PE=3 SV=1	0.0 tr|G2XIV9|G2XIV9_VERDV Putative uncharacterized protein OS=Verticillium dahliae (strain VdLs.17 / ATCC MYA-4575 / FGSC 10137) GN=VDAG_10082 PE=4 SV=1	GO:0006296,nucleotide-excision repair, DNA incision, 5'-to lesion;GO:0003684,damaged DNA binding;GO:0004519,endonuclease activity;GO:0007534,gene conversion at mating-type locus;GO:0031593,polyubiquitin binding;GO:0005829,cytosol;GO:0000109,nucleotide-excision repair complex	K10849-ko03420,Nucleotide excision repair;ko03460,Fanconi anemia pathway
c17633_g1	129.648	38.8164	220.479	5.68004	2.5059	0	0	1.91	10.89	-	-	7e-105 gnl|CDD|215702 pfam00083, Sugar_tr, Sugar (and other) transporter.	2e-84 gnl|CDD|228203 KOG0254, KOG0254, KOG0254, Predicted transporter (major facilitator superfamily) [General function prediction only].	0.0 gb|EGY23675.1| sugar transporter STL1 [Verticillium dahliae VdLs.17]	0.0 ref|XM_003002965.1| Verticillium albo-atrum VaMs.102 sugar transporter STL1, mRNA	2e-105 gnl|CDD|215702 pfam00083, Sugar_tr, Sugar (and other) transporter.	8e-105 sp|P39932|STL1_YEAST Sugar transporter STL1 OS=Saccharomyces cerevisiae (strain ATCC 204508 / S288c) GN=STL1 PE=1 SV=2	0.0 tr|G2X4N1|G2X4N1_VERDV Sugar transporter STL1 OS=Verticillium dahliae (strain VdLs.17 / ATCC MYA-4575 / FGSC 10137) GN=VDAG_05113 PE=3 SV=1	GO:0015793,glycerol transport;GO:0022891,substrate-specific transmembrane transporter activity;GO:0008643,carbohydrate transport;GO:0015295,solute:hydrogen symporter activity;GO:0016021,integral to membrane;GO:0005886,plasma membrane	-
c17643_g1	183.083	245.837	120.329	0.489467	-1.03072	5.83e-15	4.46e-14	12.68	6.23	-	-	6e-105 gnl|CDD|235451 PRK05417, PRK05417, glutathione-dependent formaldehyde-activating enzyme; Provisional.	-	4e-118 gb|EGY16691.1| glutathione-dependent formaldehyde-activating enzyme [Verticillium dahliae VdLs.17]	0.0 ref|XM_003009666.1| Verticillium albo-atrum VaMs.102 glutathione-dependent formaldehyde-activating enzyme, mRNA	7e-12 gnl|CDD|218282 pfam04828, GFA, Glutathione-dependent formaldehyde-activating enzyme.	1e-117 sp|C9S7Z6|GFA_VERA1 Putative glutathione-dependent formaldehyde-activating enzyme OS=Verticillium albo-atrum (strain VaMs.102 / ATCC MYA-4576 / FGSC 10136) GN=VDBG_01395 PE=3 SV=1	5e-118 tr|G2XCH3|G2XCH3_VERDV Putative glutathione-dependent formaldehyde-activating enzyme OS=Verticillium dahliae (strain VdLs.17 / ATCC MYA-4575 / FGSC 10137) GN=VDAG_07855 PE=3 SV=1	GO:0046294,formaldehyde catabolic process;GO:0008270,zinc ion binding;GO:0046872,metal ion binding;GO:0051907,S-(hydroxymethyl)glutathione synthase activity	K03396-ko01200,Carbon metabolism;ko00680,Methane metabolism
c17648_g1	695.746	1043.96	347.535	0.332901	-1.58683	4e-112	1.06e-110	109.06	36.55	VDBG_06504	endo-1,4-beta-xylanase I	1e-106 gnl|CDD|215928 pfam00457, Glyco_hydro_11, Glycosyl hydrolases family 11.	-	2e-104 ref|XP_003002942.1| endo-1,4-beta-xylanase I [Verticillium alfalfae VaMs.102] gb|EEY20394.1| endo-1,4-beta-xylanase I [Verticillium alfalfae VaMs.102]	-	3e-107 gnl|CDD|215928 pfam00457, Glyco_hydro_11, Glycosyl hydrolases family 11.	3e-82 sp|P36217|XYN2_HYPJE Endo-1,4-beta-xylanase 2 OS=Hypocrea jecorina GN=xyn2 PE=1 SV=1	2e-104 tr|C9SNM9|C9SNM9_VERA1 Endo-1,4-beta-xylanase OS=Verticillium albo-atrum (strain VaMs.102 / ATCC MYA-4576 / FGSC 10136) GN=VDBG_06504 PE=3 SV=1	GO:0045493,xylan catabolic process;GO:0031176,endo-1,4-beta-xylanase activity	K01181
c17673_g1	125.317	173.652	76.9808	0.443304	-1.17363	3.29e-13	2.25e-12	7.94	3.53	-	-	1e-19 gnl|CDD|215427 PLN02796, PLN02796, D-glycerate 3-kinase.	5e-19 gnl|CDD|230817 KOG2878, KOG2878, KOG2878, Predicted kinase [General function prediction only].	0.0 gb|EGY13714.1| hypothetical protein VDAG_00396 [Verticillium dahliae VdLs.17]	0.0 ref|XM_003009059.1| Verticillium albo-atrum VaMs.102 predicted protein, mRNA	-	5e-15 sp|Q9UUH3|MUG58_SCHPO Uncharacterized kinase mug58 OS=Schizosaccharomyces pombe (strain 972 / ATCC 24843) GN=mug58 PE=1 SV=1	0.0 tr|G2WS63|G2WS63_VERDV Putative uncharacterized protein OS=Verticillium dahliae (strain VdLs.17 / ATCC MYA-4575 / FGSC 10137) GN=VDAG_00396 PE=4 SV=1	GO:0016301,kinase activity;GO:0005524,ATP binding;GO:0005829,cytosol;GO:0005634,nucleus;GO:0007126,meiosis	K15918-ko00630,Glyoxylate and dicarboxylate metabolism;ko00561,Glycerolipid metabolism;ko00260,Glycine, serine and threonine metabolism
c17679_g1	65.8041	29.9636	101.645	3.39227	1.76225	8.46e-14	5.97e-13	2.81	9.58	VDBG_09993	hypothetical protein	1e-53 gnl|CDD|221224 pfam11790, Glyco_hydro_cc, Glycosyl hydrolase catalytic core. This family is probably a glycosyl hydrolase, and is conserved in fungi and some Proteobacteria. The pombe member is annotated as being from IPR013781.	-	0.0 ref|XP_002999699.1| conserved hypothetical protein [Verticillium alfalfae VaMs.102] gb|EEY23883.1| conserved hypothetical protein [Verticillium alfalfae VaMs.102]	0.0 ref|XM_002999653.1| Verticillium albo-atrum VaMs.102 conserved hypothetical protein, mRNA	3e-54 gnl|CDD|221224 pfam11790, Glyco_hydro_cc, Glycosyl hydrolase catalytic core. This family is probably a glycosyl hydrolase, and is conserved in fungi and some Proteobacteria. The pombe member is annotated as being from IPR013781.	4e-17 sp|Q09788|ASL1_SCHPO Alkali-sensitive linkage protein 1 OS=Schizosaccharomyces pombe (strain 972 / ATCC 24843) GN=asl1 PE=1 SV=1	0.0 tr|C9SYL8|C9SYL8_VERA1 Putative uncharacterized protein OS=Verticillium albo-atrum (strain VaMs.102 / ATCC MYA-4576 / FGSC 10136) GN=VDBG_09993 PE=4 SV=1	GO:0005783,endoplasmic reticulum;GO:0046379,extracellular polysaccharide metabolic process;GO:0010339,external side of cell wall;GO:0003824,catalytic activity;GO:0009277,fungal-type cell wall;GO:0043169,cation binding;GO:0071966,fungal-type cell wall polysaccharide metabolic process;GO:0004553,hydrolase activity, hydrolyzing O-glycosyl compounds;GO:0005975,carbohydrate metabolic process;GO:000557…	-
c17683_g1	54.1191	1.36198	106.876	78.4713	6.29409	0	0	0.11	8.78	-	-	6e-17 gnl|CDD|212491 cd05233, SDR_c, classical (c) SDRs. SDRs are a functionally diverse family of oxidoreductases that have a single domain with a structurally conserved Rossmann fold (alpha/beta folding pattern with a central beta-sheet), an NAD(P)(H)-binding region, and a structurally diverse C-terminal region. Classical SDRs are typically about 250 residues long, while extended SDRs are appro…	2e-06 gnl|CDD|228672 KOG0725, KOG0725, KOG0725, Reductases with broad range of substrate specificities [General function prediction only].	8e-173 gb|EGY16096.1| hypothetical protein VDAG_07260 [Verticillium dahliae VdLs.17]	0.0 ref|XM_003000571.1| Verticillium albo-atrum VaMs.102 conserved hypothetical protein, mRNA	-	-	9e-173 tr|G2XBC2|G2XBC2_VERDV Putative uncharacterized protein OS=Verticillium dahliae (strain VdLs.17 / ATCC MYA-4575 / FGSC 10137) GN=VDAG_07260 PE=4 SV=1	GO:0055114,oxidation-reduction process;GO:0000166,nucleotide binding;GO:0016491,oxidoreductase activity	-
c17690_g1	569.058	798.801	339.314	0.424778	-1.23522	1.17e-59	2.31e-58	103.84	44.47	-	-	6e-161 gnl|CDD|191210 pfam05153, DUF706, Family of unknown function (DUF706). Family of uncharacterized eukaryotic function. Some members have a described putative function, but a common theme is not evident.	1e-67 gnl|CDD|229514 KOG1573, KOG1573, KOG1573, Aldehyde reductase [General function prediction only].	0.0 gb|EGY17003.1| inositol oxygenase [Verticillium dahliae VdLs.17]	0.0 ref|XM_003001411.1| Verticillium albo-atrum VaMs.102 inositol oxygenase, mRNA	1e-161 gnl|CDD|191210 pfam05153, DUF706, Family of unknown function (DUF706). Family of uncharacterized eukaryotic function. Some members have a described putative function, but a common theme is not evident.	3e-80 sp|Q5Z8T3|MIOX_ORYSJ Probable inositol oxygenase OS=Oryza sativa subsp. japonica GN=Os06g0561000 PE=2 SV=1	0.0 tr|G2XDD5|G2XDD5_VERDV Inositol oxygenase OS=Verticillium dahliae (strain VdLs.17 / ATCC MYA-4575 / FGSC 10137) GN=VDAG_08167 PE=4 SV=1	GO:0005737,cytoplasm;GO:0050113,inositol oxygenase activity;GO:0019853,L-ascorbic acid biosynthetic process;GO:0006949,syncytium formation;GO:0019310,inositol catabolic process;GO:0005506,iron ion binding	K00469-ko00053,Ascorbate and aldarate metabolism;ko00562,Inositol phosphate metabolism
c177_g1	21.6836	38.1354	5.23171	0.137188	-2.86578	7.39e-10	3.54e-09	2.75	0.38	-	-	2e-45 gnl|CDD|234094 TIGR03026, NDP-sugDHase, nucleotide sugar dehydrogenase. Enzymes in this family catalyze the NAD-dependent alcohol-to-acid oxidation of nucleotide-linked sugars. Examples include UDP-glucose 6-dehydrogenase (1.1.1.22) , GDP-mannose 6-dehydrogenase (1.1.1.132) , UDP-N-acetylglucosamine 6-dehydrogenase (1.1.1.136), UDP-N-acetyl-D-galactosaminuronic acid dehydrogenase and UDP-N-…	-	0.0 gb|EGY14240.1| polysaccharide biosynthesis protein vipA/tviB [Verticillium dahliae VdLs.17]	0.0 ref|XM_003001535.1| Verticillium albo-atrum VaMs.102 capL, mRNA	3e-20 gnl|CDD|201536 pfam00984, UDPG_MGDP_dh, UDP-glucose/GDP-mannose dehydrogenase family, central domain. The UDP-glucose/GDP-mannose dehydrogenaseses are a small group of enzymes which possesses the ability to catalyze the NAD-dependent 2-fold oxidation of an alcohol to an acid without the release of an aldehyde intermediate.	2e-35 sp|G3XD94|UGND_PSEAE UDP-N-acetyl-D-glucosamine 6-dehydrogenase OS=Pseudomonas aeruginosa (strain ATCC 15692 / PAO1 / 1C / PRS 101 / LMG 12228) GN=wbpA PE=1 SV=1	0.0 tr|G2X599|G2X599_VERDV UDP-glucose 6-dehydrogenase OS=Verticillium dahliae (strain VdLs.17 / ATCC MYA-4575 / FGSC 10137) GN=VDAG_05404 PE=3 SV=1	GO:0009243,O antigen biosynthetic process;GO:0047004,UDP-N-acetylglucosamine 6-dehydrogenase activity;GO:0016021,integral to membrane;GO:0003979,UDP-glucose 6-dehydrogenase activity;GO:0051287,NAD binding	-
c17700_g1	395.673	537.982	253.364	0.470953	-1.08635	1.62e-33	2.25e-32	9.08	4.28	-	-	4e-79 gnl|CDD|132940 cd06609, STKc_MST3_like, Catalytic domain of Mammalian Ste20-like protein kinase 3-like Protein Serine/Threonine Kinases. Serine/threonine kinases (STKs), mammalian Ste20-like protein kinase 3 (MST3)-like subfamily, catalytic (c) domain. STKs catalyze the transfer of the gamma-phosphoryl group from ATP to serine/threonine residues on protein substrates. The MST3-like subfamil…	3e-69 gnl|CDD|228150 KOG0201, KOG0201, KOG0201, Serine/threonine protein kinase [Signal transduction mechanisms].	0.0 gb|EGY22806.1| hypothetical protein VDAG_04244 [Verticillium dahliae VdLs.17]	0.0 ref|XM_003005051.1| Verticillium albo-atrum VaMs.102 serine/threonine-protein kinase nak1, mRNA	1e-60 gnl|CDD|215690 pfam00069, Pkinase, Protein kinase domain.	3e-59 sp|O75011|NAK1_SCHPO Serine/threonine-protein kinase nak1 OS=Schizosaccharomyces pombe (strain 972 / ATCC 24843) GN=nak1 PE=1 SV=1	0.0 tr|G2X1S0|G2X1S0_VERDV Putative uncharacterized protein OS=Verticillium dahliae (strain VdLs.17 / ATCC MYA-4575 / FGSC 10137) GN=VDAG_04244 PE=4 SV=1	GO:0033554,cellular response to stress;GO:0030037,actin filament reorganization involved in cell cycle;GO:0030479,actin cortical patch;GO:0061246,establishment or maintenance of bipolar cell polarity regulating cell shape;GO:2000100,regulation of establishment or maintenance of bipolar cell polarity regulating cell shape;GO:0034613,cellular protein localization;GO:0005524,ATP binding;GO:0005816,s…	-
c17721_g1	36.5062	17.7057	55.3066	3.12365	1.64323	9.81e-08	4.03e-07	20.58	67.42	-	-	-	-	2e-18 gb|EGY22923.1| dihydrolipoamide transacylase [Verticillium dahliae VdLs.17]	-	-	-	3e-18 tr|G2X237|G2X237_VERDV Dihydrolipoamide transacylase OS=Verticillium dahliae (strain VdLs.17 / ATCC MYA-4575 / FGSC 10137) GN=VDAG_04361 PE=3 SV=1	GO:0046949,fatty-acyl-CoA biosynthetic process;GO:0043754,dihydrolipoyllysine-residue (2-methylpropanoyl)transferase activity;GO:0048037,cofactor binding	-
c17722_g1	2080.7	813.102	3348.29	4.11792	2.04192	0	0	40.25	166.25	-	-	0.0 gnl|CDD|234217 TIGR03458, YgfH_subfam, succinate CoA transferase. This family of CoA transferases includes enzymes catalyzing at least two related but distinct activities. The E. coli YgfH protein has been characterized as a propionyl-CoA:succinate CoA transferase where it appears to be involved in a pathway for the decarboxylation of succinate to propionate. The Clostridium kluyveri CAT1 pro…	7e-151 gnl|CDD|230767 KOG2828, KOG2828, KOG2828, Acetyl-CoA hydrolase [Energy production and conversion].	0.0 gb|EGY16702.1| acetyl-CoA hydrolase [Verticillium dahliae VdLs.17]	0.0 ref|XM_003009655.1| Verticillium albo-atrum VaMs.102 acetyl-CoA hydrolase, mRNA	7e-48 gnl|CDD|205516 pfam13336, AcetylCoA_hyd_C, Acetyl-CoA hydrolase/transferase C-terminal domain. This family contains several enzymes which take part in pathways involving acetyl-CoA. Acetyl-CoA hydrolase EC:3.1.2.1 catalyzes the formation of acetate from acetyl-CoA, CoA transferase (CAT1) EC:2.8.3.- produces succinyl-CoA, and acetate-CoA transferase EC:2.8.3.8 utilises acyl-CoA and acetate t…	0.0 sp|P15937|ACH1_NEUCR Acetyl-CoA hydrolase OS=Neurospora crassa (strain ATCC 24698 / 74-OR23-1A / CBS 708.71 / DSM 1257 / FGSC 987) GN=acu-8 PE=3 SV=2	0.0 tr|G2XCI4|G2XCI4_VERDV Acetyl-CoA hydrolase OS=Verticillium dahliae (strain VdLs.17 / ATCC MYA-4575 / FGSC 10137) GN=VDAG_07866 PE=4 SV=1	GO:0016787,hydrolase activity;GO:0003986,acetyl-CoA hydrolase activity;GO:0008775,acetate CoA-transferase activity;GO:0006083,acetate metabolic process;GO:0006084,acetyl-CoA metabolic process;GO:0005829,cytosol;GO:0005739,mitochondrion	K01067-ko00620,Pyruvate metabolism
c17724_g1	257.03	415.404	98.6551	0.237492	-2.07405	4.18e-65	8.68e-64	21.48	5.12	-	-	7e-57 gnl|CDD|215689 pfam00067, p450, Cytochrome P450. Cytochrome P450s are haem-thiolate proteins involved in the oxidative degradation of various compounds. They are particularly well known for their role in the degradation of environmental toxins and mutagens. They can be divided into 4 classes, according to the method by which electrons from NAD(P)H are delivered to the catalytic site. Sequen…	6e-56 gnl|CDD|228107 KOG0157, KOG0157, KOG0157, Cytochrome P450 CYP4/CYP19/CYP26 subfamilies [Secondary metabolites biosynthesis, transport and catabolism, Lipid transport and metabolism].	0.0 gb|EGY15178.1| cytochrome P450 71B13 [Verticillium dahliae VdLs.17]	0.0 ref|XM_003002712.1| Verticillium albo-atrum VaMs.102 flavonoid 3',5'-hydroxylase, mRNA	2e-57 gnl|CDD|215689 pfam00067, p450, Cytochrome P450. Cytochrome P450s are haem-thiolate proteins involved in the oxidative degradation of various compounds. They are particularly well known for their role in the degradation of environmental toxins and mutagens. They can be divided into 4 classes, according to the method by which electrons from NAD(P)H are delivered to the catalytic site. Sequen…	3e-49 sp|P38364|PID6_FUSSO Pisatin demethylase OS=Fusarium solani subsp. pisi GN=PDA6-1 PE=3 SV=1	0.0 tr|G2X891|G2X891_VERDV Cytochrome P450 71B13 OS=Verticillium dahliae (strain VdLs.17 / ATCC MYA-4575 / FGSC 10137) GN=VDAG_06032 PE=3 SV=1	GO:0009055,electron carrier activity;GO:0020037,heme binding;GO:0004497,monooxygenase activity;GO:0005506,iron ion binding;GO:0016705,oxidoreductase activity, acting on paired donors, with incorporation or reduction of molecular oxygen	-
c17737_g1	466.709	268.991	664.427	2.47007	1.30455	8.52e-12	5.06e-11	18.42	45.7	-	-	1e-32 gnl|CDD|216213 pfam00956, NAP, Nucleosome assembly protein (NAP). NAP proteins are involved in moving histones into the nucleus, nucleosome assembly and chromatin fluidity. They affect the transcription of many genes.	5e-10 gnl|CDD|229449 KOG1508, KOG1508, KOG1508, DNA replication factor/protein phosphatase inhibitor SET/SPR-2 [Replication, recombination and repair].	0.0 gb|EGY17789.1| NAP family protein [Verticillium dahliae VdLs.17]	0.0 ref|XM_003006243.1| Verticillium albo-atrum VaMs.102 NapB, mRNA	2e-33 gnl|CDD|216213 pfam00956, NAP, Nucleosome assembly protein (NAP). NAP proteins are involved in moving histones into the nucleus, nucleosome assembly and chromatin fluidity. They affect the transcription of many genes.	2e-21 sp|Q9HGN2|YO48_SCHPO Putative nucleosome assembly protein C36B7.08c OS=Schizosaccharomyces pombe (strain 972 / ATCC 24843) GN=SPBC36B7.08c PE=1 SV=1	0.0 tr|G2WUJ8|G2WUJ8_VERDV NAP family protein OS=Verticillium dahliae (strain VdLs.17 / ATCC MYA-4575 / FGSC 10137) GN=VDAG_01471 PE=3 SV=1	GO:0006334,nucleosome assembly;GO:0000790,nuclear chromatin;GO:0042393,histone binding;GO:0035066,positive regulation of histone acetylation;GO:0005634,nucleus;GO:0010698,acetyltransferase activator activity	-
c17738_g1	3359.49	76.9519	6642.03	86.314	6.43152	0	0	2.01	174.01	-	-	1e-12 gnl|CDD|223149 COG0071, IbpA, Molecular chaperone (small heat shock protein) [Posttranslational modification, protein turnover, chaperones].	-	4e-70 gb|EGY22645.1| hypothetical protein VDAG_04083 [Verticillium dahliae VdLs.17]	3e-136 ref|XM_003004887.1| Verticillium albo-atrum VaMs.102 hypothetical protein, mRNA	-	-	4e-70 tr|G2X2N9|G2X2N9_VERDV Putative uncharacterized protein OS=Verticillium dahliae (strain VdLs.17 / ATCC MYA-4575 / FGSC 10137) GN=VDAG_04083 PE=4 SV=1	-	K13993-ko04141,Protein processing in endoplasmic reticulum
c17744_g1	157.093	4.76693	309.418	64.9093	6.02035	0	0	0.41	26.91	-	-	-	-	-	-	-	-	-	-	-
c17745_g1	92.3278	22.4727	162.183	7.2169	2.85138	2.91e-14	2.13e-13	1.45	10.49	-	-	-	-	7e-77 gb|EGY20808.1| hypothetical protein VDAG_10437 [Verticillium dahliae VdLs.17]	0.0 ref|XM_003001150.1| Verticillium albo-atrum VaMs.102 predicted protein, mRNA	-	-	9e-77 tr|G2XJV5|G2XJV5_VERDV Putative uncharacterized protein OS=Verticillium dahliae (strain VdLs.17 / ATCC MYA-4575 / FGSC 10137) GN=VDAG_10437 PE=4 SV=1	-	-
c1775_g1	507.329	708.23	306.429	0.432668	-1.20867	2.27e-51	4.19e-50	41.95	18.22	-	-	-	-	3e-116 gb|EGY20571.1| hypothetical protein VDAG_10200 [Verticillium dahliae VdLs.17]	0.0 ref|XM_003001126.1| Verticillium albo-atrum VaMs.102 hypothetical protein, mRNA	-	-	3e-116 tr|G2XJ68|G2XJ68_VERDV Putative uncharacterized protein OS=Verticillium dahliae (strain VdLs.17 / ATCC MYA-4575 / FGSC 10137) GN=VDAG_10200 PE=4 SV=1	-	-
c17757_g1	203.871	302.36	105.382	0.34853	-1.52064	9.15e-32	1.22e-30	11.86	4.14	-	-	3e-107 gnl|CDD|233208 TIGR00956, 3a01205, Pleiotropic Drug Resistance (PDR) Family protein. [Transport and binding proteins, Other].	2e-114 gnl|CDD|228016 KOG0065, KOG0065, KOG0065, Pleiotropic drug resistance proteins (PDR1-15), ABC superfamily [Secondary metabolites biosynthesis, transport and catabolism].	0.0 gb|EGY16178.1| brefeldin A resistance protein [Verticillium dahliae VdLs.17]	0.0 ref|XM_003000647.1| Verticillium albo-atrum VaMs.102 brefeldin A resistance protein, mRNA	7e-55 gnl|CDD|216273 pfam01061, ABC2_membrane, ABC-2 type transporter.	3e-79 sp|Q556W2|ABCGH_DICDI ABC transporter G family member 17 OS=Dictyostelium discoideum GN=abcG17-1 PE=3 SV=1	0.0 tr|G2XAW3|G2XAW3_VERDV Brefeldin A resistance protein OS=Verticillium dahliae (strain VdLs.17 / ATCC MYA-4575 / FGSC 10137) GN=VDAG_07342 PE=3 SV=1	GO:0005524,ATP binding;GO:0016021,integral to membrane;GO:0042626,ATPase activity, coupled to transmembrane movement of substances;GO:0006200,ATP catabolic process	-
c17769_g1	389.058	666.008	112.108	0.168328	-2.57065	2.4e-133	6.76e-132	191.11	32.75	-	-	-	-	2e-09 gb|EGY16819.1| mixed-linked glucanase [Verticillium dahliae VdLs.17]	3e-113 ref|XM_003009549.1| Verticillium albo-atrum VaMs.102 mixed-linked glucanase, mRNA	-	-	3e-09 tr|G2XCV1|G2XCV1_VERDV Mixed-linked glucanase OS=Verticillium dahliae (strain VdLs.17 / ATCC MYA-4575 / FGSC 10137) GN=VDAG_07983 PE=4 SV=1	GO:0004553,hydrolase activity, hydrolyzing O-glycosyl compounds;GO:0005975,carbohydrate metabolic process	-
c1777_g1	35.0123	48.3503	21.6742	0.448275	-1.15754	0.000157406	0.000489445	2.25	1.01	-	-	2e-73 gnl|CDD|185721 cd08980, GH43_1, Glycosyl hydrolase family 43. This glycosyl hydrolase family 43 (GH43) includes enzymes with beta-xylosidase (EC 3.2.1.37) and alpha-L-arabinofuranosidase (EC 3.2.1.55) and possibly bifunctional xylosidase/arabinofuranosidase activities. These are inverting enzymes (i.e. they invert the stereochemistry of the anomeric carbon atom of the substrate) that have a…	-	0.0 gb|EGY20067.1| hydrolase [Verticillium dahliae VdLs.17]	0.0 ref|XM_003006989.1| Verticillium albo-atrum VaMs.102 glycosyl hydrolase family 43 protein, mRNA	7e-27 gnl|CDD|218178 pfam04616, Glyco_hydro_43, Glycosyl hydrolases family 43. The glycosyl hydrolase family 43 contains members that are arabinanase. Rabinanases hydrolyses the alpha-1,5-linked L-arabinofuranoside backbone of plant cell wall arabinans. The structure of arabinanase Arb43A from Cellvibrio japonicus reveals a five-bladed beta-propeller fold. A long V-shaped groove, partially enclos…	1e-13 sp|P82594|IABF_STRCX Extracellular exo-alpha-(1->5)-L-arabinofuranosidase OS=Streptomyces chartreusis PE=1 SV=1	0.0 tr|G2WUU2|G2WUU2_VERDV Hydrolase OS=Verticillium dahliae (strain VdLs.17 / ATCC MYA-4575 / FGSC 10137) GN=VDAG_02083 PE=4 SV=1	GO:0046556,alpha-N-arabinofuranosidase activity;GO:0004553,hydrolase activity, hydrolyzing O-glycosyl compounds;GO:0005975,carbohydrate metabolic process;GO:0005576,extracellular region	-
c17770_g1	446.78	608.805	284.754	0.467727	-1.09626	3.03e-38	4.65e-37	16.72	7.84	-	-	1e-16 gnl|CDD|218122 pfam04515, Choline_transpo, Plasma-membrane choline transporter. This family represents a high-affinity plasma-membrane choline transporter in C.elegans which is thought to be rate-limiting for ACh synthesis in cholinergic nerve terminals.	3e-20 gnl|CDD|229304 KOG1362, KOG1362, KOG1362, Choline transporter-like protein [Lipid transport and metabolism].	0.0 gb|EGY22497.1| hypothetical protein VDAG_03935 [Verticillium dahliae VdLs.17]	0.0 ref|XM_003006838.1| Verticillium albo-atrum VaMs.102 conserved hypothetical protein, mRNA	2e-17 gnl|CDD|218122 pfam04515, Choline_transpo, Plasma-membrane choline transporter. This family represents a high-affinity plasma-membrane choline transporter in C.elegans which is thought to be rate-limiting for ACh synthesis in cholinergic nerve terminals.	4e-28 sp|O74441|YJEB_SCHPO Uncharacterized choline transporter-like protein C1682.11c OS=Schizosaccharomyces pombe (strain 972 / ATCC 24843) GN=SPCC1682.11c PE=3 SV=1	0.0 tr|G2X106|G2X106_VERDV Putative uncharacterized protein OS=Verticillium dahliae (strain VdLs.17 / ATCC MYA-4575 / FGSC 10137) GN=VDAG_03935 PE=4 SV=1	GO:0016020,membrane;GO:0005783,endoplasmic reticulum;GO:0005789,endoplasmic reticulum membrane;GO:0016021,integral to membrane;GO:0022857,transmembrane transporter activity	-
c17785_g1	58.6537	15.6628	101.645	6.48957	2.69812	4.35e-14	3.14e-13	3.33	21.91	-	-	-	-	-	-	-	-	-	-	-
c17793_g1	423.02	567.265	278.775	0.491438	-1.02492	3.25e-32	4.37e-31	24.31	11.98	-	-	2e-16 gnl|CDD|150113 pfam09337, zf-H2C2, His(2)-Cys(2) zinc finger. This domain binds to histone upstream activating sequence (UAS) elements that are found in histone gene promoters.	-	0.0 gb|EGY22561.1| SPT10 protein [Verticillium dahliae VdLs.17]	0.0 ref|XM_003006906.1| Verticillium albo-atrum VaMs.102 SPT10, mRNA	5e-17 gnl|CDD|150113 pfam09337, zf-H2C2, His(2)-Cys(2) zinc finger. This domain binds to histone upstream activating sequence (UAS) elements that are found in histone gene promoters.	2e-63 sp|P35208|SPT10_YEAST Protein SPT10 OS=Saccharomyces cerevisiae (strain ATCC 204508 / S288c) GN=SPT10 PE=1 SV=1	0.0 tr|G2X170|G2X170_VERDV SPT10 protein OS=Verticillium dahliae (strain VdLs.17 / ATCC MYA-4575 / FGSC 10137) GN=VDAG_03999 PE=4 SV=1	GO:0006338,chromatin remodeling;GO:0008080,N-acetyltransferase activity;GO:0006348,chromatin silencing at telomere;GO:0000122,negative regulation of transcription from RNA polymerase II promoter;GO:0000183,chromatin silencing at rDNA;GO:0043565,sequence-specific DNA binding;GO:0030466,chromatin silencing at silent mating-type cassette;GO:0005634,nucleus;GO:0006281,DNA repair;GO:0004402,histone ac…	-
c17794_g1	759.207	1014.68	503.739	0.496453	-1.01027	5.22e-55	1e-53	87.15	43.5	VDBG_02524	peptidyl-prolyl cis-trans isomerase ssp-1	1e-42 gnl|CDD|185573 PTZ00356, PTZ00356, peptidyl-prolyl cis-trans isomerase (PPIase); Provisional.	1e-65 gnl|CDD|231197 KOG3259, KOG3259, KOG3259, Peptidyl-prolyl cis-trans isomerase [Posttranslational modification, protein turnover, chaperones].	7e-123 ref|XP_003006385.1| peptidyl-prolyl cis-trans isomerase ssp-1 [Verticillium alfalfae VaMs.102] gb|EEY16415.1| peptidyl-prolyl cis-trans isomerase ssp-1 [Verticillium alfalfae VaMs.102]	0.0 ref|XM_003006339.1| Verticillium albo-atrum VaMs.102 peptidyl-prolyl cis-trans isomerase ssp-1, mRNA	1e-20 gnl|CDD|216038 pfam00639, Rotamase, PPIC-type PPIASE domain. Rotamases increase the rate of protein folding by catalyzing the interconversion of cis-proline and trans-proline.	1e-79 sp|O60045|SSP1_NEUCR Peptidyl-prolyl cis-trans isomerase ssp-1 OS=Neurospora crassa (strain ATCC 24698 / 74-OR23-1A / CBS 708.71 / DSM 1257 / FGSC 987) GN=ssp-1 PE=1 SV=3	8e-123 tr|C9SDJ4|C9SDJ4_VERA1 Peptidyl-prolyl cis-trans isomerase ssp-1 OS=Verticillium albo-atrum (strain VaMs.102 / ATCC MYA-4576 / FGSC 10136) GN=VDBG_02524 PE=4 SV=1	GO:0031064,negative regulation of histone deacetylation;GO:0006457,protein folding;GO:0045899,positive regulation of RNA polymerase II transcriptional preinitiation complex assembly;GO:2000749,positive regulation of chromatin silencing at rDNA;GO:2000059,negative regulation of protein ubiquitination involved in ubiquitin-dependent protein catabolic process;GO:0003755,peptidyl-prolyl cis-trans iso…	K09578-ko04622,RIG-I-like receptor signaling pathway
c17795_g1	276.357	532.534	20.1794	0.0378932	-4.72192	4.76e-179	1.48e-177	34.42	1.31	-	-	4e-51 gnl|CDD|220097 pfam09056, Phospholip_A2_3, Prokaryotic phospholipase A2. The prokaryotic phospholipase A2 domain is predominantly found in bacterial and fungal phospholipases, as well as various hypothetical and putative proteins. It enables the liberation of fatty acids and lysophospholipid by hydrolysing the 2-ester bond of 1,2-diacyl-3-sn-phosphoglycerides. The domain adopts an alpha-hel…	-	3e-117 gb|EGY22581.1| secretory phospholipase A2 [Verticillium dahliae VdLs.17]	0.0 ref|XM_003006927.1| Verticillium albo-atrum VaMs.102 secretory phospholipase A2, mRNA	8e-52 gnl|CDD|220097 pfam09056, Phospholip_A2_3, Prokaryotic phospholipase A2. The prokaryotic phospholipase A2 domain is predominantly found in bacterial and fungal phospholipases, as well as various hypothetical and putative proteins. It enables the liberation of fatty acids and lysophospholipid by hydrolysing the 2-ester bond of 1,2-diacyl-3-sn-phosphoglycerides. The domain adopts an alpha-hel…	-	4e-117 tr|G2X190|G2X190_VERDV Secretory phospholipase A2 OS=Verticillium dahliae (strain VdLs.17 / ATCC MYA-4575 / FGSC 10137) GN=VDAG_04019 PE=4 SV=1	-	-
c17800_g1	244.001	161.395	326.608	2.02366	1.01697	1.86e-12	1.19e-11	9.22	18.72	-	-	1e-129 gnl|CDD|232797 TIGR00045, TIGR00045, glycerate kinase. The only characterized member of this family so far is the glycerate kinase GlxK (EC 2.7.1.31) of E. coli. This enzyme acts after glyoxylate carboligase and 2-hydroxy-3-oxopropionate reductase (tartronate semialdehyde reductase) in the conversion of glyoxylate to 3-phosphoglycerate (the D-glycerate pathway) as a part of allantoin degra…	-	0.0 gb|EGY17074.1| glycerate kinase [Verticillium dahliae VdLs.17]	0.0 ref|XM_003001476.1| Verticillium albo-atrum VaMs.102 glycerate kinase, mRNA	4e-101 gnl|CDD|145634 pfam02595, Gly_kinase, Glycerate kinase family. This is family of Glycerate kinases.	6e-83 sp|P42100|GLXK_BACSU Glycerate kinase OS=Bacillus subtilis (strain 168) GN=glxK PE=3 SV=2	0.0 tr|G2XDK6|G2XDK6_VERDV Glycerate kinase OS=Verticillium dahliae (strain VdLs.17 / ATCC MYA-4575 / FGSC 10137) GN=VDAG_08238 PE=4 SV=1	GO:0031388,organic acid phosphorylation;GO:0005524,ATP binding;GO:0008887,glycerate kinase activity	K00865-ko00630,Glyoxylate and dicarboxylate metabolism;ko00561,Glycerolipid metabolism;ko00260,Glycine, serine and threonine metabolism
c17822_g1	54.1779	23.1537	85.2021	3.67985	1.87965	3.72e-13	2.54e-12	2.91	10.79	-	-	-	-	3e-43 gb|EGY18269.1| hypothetical protein VDAG_08603 [Verticillium dahliae VdLs.17]	-	-	-	3e-43 tr|G2XEL8|G2XEL8_VERDV Putative uncharacterized protein OS=Verticillium dahliae (strain VdLs.17 / ATCC MYA-4575 / FGSC 10137) GN=VDAG_08603 PE=4 SV=1	-	-
c17828_g1	53.9872	34.7305	73.2439	2.10892	1.07651	9.23e-06	3.27e-05	7.83	16.76	-	-	-	-	-	-	-	-	-	-	-
c17852_g1	383.624	248.561	518.686	2.08675	1.06126	6.37e-12	3.86e-11	9.13	19.1	-	-	-	-	0.0 gb|EGY17374.1| IQ calmodulin-binding motif protein [Verticillium dahliae VdLs.17]	0.0 ref|XM_003005831.1| Verticillium albo-atrum VaMs.102 IQ calmodulin-binding motif protein, mRNA	-	-	0.0 tr|G2WTD3|G2WTD3_VERDV IQ calmodulin-binding motif protein OS=Verticillium dahliae (strain VdLs.17 / ATCC MYA-4575 / FGSC 10137) GN=VDAG_01056 PE=4 SV=1	-	-
c17857_g1	35.4277	55.1602	15.6951	0.284537	-1.81331	1.69e-08	7.33e-08	2.33	0.66	-	-	4e-10 gnl|CDD|197313 cd09079, RgfB-like, Streptococcus agalactiae RgfB, part of a putative two component signal transduction system, and related proteins. This family includes Streptococcus agalactiae RgfB (for regulator of fibrinogen binding) and related proteins. The function of RgfB is unknown. It is part of a putative two component signal transduction system designated rgfBDAC (the rgf locus …	-	0.0 gb|EGY23568.1| endonuclease/exonuclease/phosphatase family [Verticillium dahliae VdLs.17]	0.0 ref|XM_003002858.1| Verticillium albo-atrum VaMs.102 endonuclease/exonuclease/phosphatase family, mRNA	-	1e-34 sp|Q9GUC9|YFEF9_CAEEL Uncharacterized protein F14F9.5 OS=Caenorhabditis elegans GN=F14F9.5 PE=1 SV=2	0.0 tr|G2X4C4|G2X4C4_VERDV Endonuclease/exonuclease/phosphatase family OS=Verticillium dahliae (strain VdLs.17 / ATCC MYA-4575 / FGSC 10137) GN=VDAG_05006 PE=4 SV=1	GO:0016020,membrane;GO:0004519,endonuclease activity;GO:0005576,extracellular region;GO:0006974,response to DNA damage stimulus;GO:0004527,exonuclease activity;GO:0005509,calcium ion binding	-
c17865_g1	35.958	13.6198	58.2962	4.28025	2.0977	1.01e-10	5.32e-10	1.08	4.63	-	-	-	-	-	-	-	-	-	-	-
c17866_g1	11.7922	3.40495	20.1794	5.9265	2.56718	2.15e-05	7.38e-05	8.15	51.61	-	-	-	-	-	-	-	-	-	-	-
c17895_g1	20.4867	1.36198	39.6115	29.0838	4.86214	2.89e-15	2.24e-14	0.3	8.94	-	-	-	-	-	-	-	-	-	-	-
c1790_g1	9.61643	2.04297	17.1899	8.41417	3.07282	1.78e-05	6.13e-05	0.39	3.04	-	-	-	-	-	-	-	-	-	-	-
c17906_g1	27.4635	42.2214	12.7056	0.300927	-1.73251	1.83e-06	6.87e-06	2.8	0.85	-	-	1e-62 gnl|CDD|215741 pfam00135, COesterase, Carboxylesterase family.	1e-37 gnl|CDD|232318 KOG4389, KOG4389, KOG4389, Acetylcholinesterase/Butyrylcholinesterase [Signal transduction mechanisms].	0.0 gb|EGY22884.1| acetylcholinesterase [Verticillium dahliae VdLs.17]	0.0 ref|XM_003005130.1| Verticillium albo-atrum VaMs.102 acetylcholinesterase, mRNA	2e-63 gnl|CDD|215741 pfam00135, COesterase, Carboxylesterase family.	8e-30 sp|P20261|LIP1_CANRU Lipase 1 OS=Candida rugosa GN=LIP1 PE=1 SV=3	0.0 tr|G2X1Z8|G2X1Z8_VERDV Acetylcholinesterase OS=Verticillium dahliae (strain VdLs.17 / ATCC MYA-4575 / FGSC 10137) GN=VDAG_04322 PE=4 SV=1	GO:0004806,triglyceride lipase activity;GO:0050253,retinyl-palmitate esterase activity;GO:0016042,lipid catabolic process	-
c17910_g1	87.8929	6.12891	169.657	27.6814	4.79084	0	0	0.29	8.12	-	-	-	-	-	-	-	-	-	-	-
c17943_g1	135.698	221.322	50.0749	0.226254	-2.14399	6.64e-37	9.89e-36	24.39	5.56	-	-	-	-	3e-136 gb|EGY14491.1| hypothetical protein VDAG_05655 [Verticillium dahliae VdLs.17]	2e-118 ref|XM_003002182.1| Verticillium albo-atrum VaMs.102 conserved hypothetical protein, mRNA	-	-	3e-136 tr|G2X673|G2X673_VERDV Putative uncharacterized protein OS=Verticillium dahliae (strain VdLs.17 / ATCC MYA-4575 / FGSC 10137) GN=VDAG_05655 PE=4 SV=1	-	-
c17961_g1	188.805	258.776	118.835	0.459217	-1.12275	8.96e-18	7.82e-17	18.47	8.52	-	-	0.0 gnl|CDD|193494 cd02697, M20_like, M20 Zn-peptidases include exopeptidases. Peptidase M20 family; uncharacterized subfamily. These hypothetical proteins have been inferred by homology to be exopeptidases: carboxypeptidases, dipeptidases and a specialized aminopeptidase. In general, the peptidase hydrolyzes the late products of protein degradation in order to complete the conversion of proteins…	8e-26 gnl|CDD|230214 KOG2275, KOG2275, KOG2275, Aminoacylase ACY1 and related metalloexopeptidases [Amino acid transport and metabolism].	0.0 gb|EGY17032.1| acetylornithine deacetylase [Verticillium dahliae VdLs.17]	0.0 ref|XM_003001439.1| Verticillium albo-atrum VaMs.102 acetylornithine deacetylase or succinyl-diaminopimelate desuccinylase, mRNA	2e-39 gnl|CDD|216562 pfam01546, Peptidase_M20, Peptidase family M20/M25/M40. This family includes a range of zinc metallopeptidases belonging to several families in the peptidase classification. Family M20 are Glutamate carboxypeptidases. Peptidase family M25 contains X-His dipeptidases.	5e-25 sp|B9KD35|DAPE_CAMLR Succinyl-diaminopimelate desuccinylase OS=Campylobacter lari (strain RM2100 / D67 / ATCC BAA-1060) GN=dapE PE=3 SV=1	0.0 tr|G2XDG4|G2XDG4_VERDV Acetylornithine deacetylase OS=Verticillium dahliae (strain VdLs.17 / ATCC MYA-4575 / FGSC 10137) GN=VDAG_08196 PE=4 SV=1	GO:0019877,diaminopimelate biosynthetic process;GO:0006508,proteolysis;GO:0009089,lysine biosynthetic process via diaminopimelate;GO:0009014,succinyl-diaminopimelate desuccinylase activity;GO:0008237,metallopeptidase activity;GO:0046872,metal ion binding	-
c17964_g1	191.729	260.138	123.319	0.474051	-1.07689	8.49e-17	7.11e-16	16.45	7.83	-	-	-	-	3e-168 gb|EGY18746.1| hypothetical protein VDAG_08906 [Verticillium dahliae VdLs.17]	0.0 ref|XM_003004042.1| Verticillium albo-atrum VaMs.102 conserved hypothetical protein, mRNA	-	-	4e-168 tr|G2XGB9|G2XGB9_VERDV Putative uncharacterized protein OS=Verticillium dahliae (strain VdLs.17 / ATCC MYA-4575 / FGSC 10137) GN=VDAG_08906 PE=4 SV=1	-	-
c17974_g1	159.093	270.353	47.8328	0.176927	-2.49877	1.93e-53	3.64e-52	41.7	7.45	-	-	-	-	-	-	-	-	-	-	-
c17975_g1	16.617	4.08594	29.1481	7.13375	2.83466	5.99e-08	2.5e-07	0.39	2.79	-	-	-	-	-	-	-	-	-	-	-
c17990_g1	37.0969	59.2461	14.9477	0.252299	-1.98679	5.02e-10	2.43e-09	30.31	7.87	VDBG_05004	N-chimaerin	-	-	1e-13 ref|XP_003005398.1| N-chimaerin [Verticillium alfalfae VaMs.102] gb|EEY18895.1| N-chimaerin [Verticillium alfalfae VaMs.102]	3e-87 ref|XM_003005352.1| Verticillium albo-atrum VaMs.102 N-chimaerin, mRNA	-	-	2e-13 tr|C9SIX2|C9SIX2_VERA1 N-chimaerin OS=Verticillium albo-atrum (strain VaMs.102 / ATCC MYA-4576 / FGSC 10136) GN=VDBG_05004 PE=4 SV=1	GO:0007165,signal transduction;GO:0005622,intracellular;GO:0035091,phosphatidylinositol binding;GO:0043547,positive regulation of GTPase activity;GO:0005096,GTPase activator activity	-
c17996_g1	7.21679	12.9388	1.49477	0.115526	-3.11371	0.000275747	0.00083791	4.45	0.52	-	-	-	-	3e-27 gb|EGY21145.1| hypothetical protein VDAG_02669 [Verticillium dahliae VdLs.17]	0.0 ref|XM_003007967.1| Verticillium albo-atrum VaMs.102 hypothetical protein, mRNA	-	-	4e-27 tr|G2WYI7|G2WYI7_VERDV Putative uncharacterized protein OS=Verticillium dahliae (strain VdLs.17 / ATCC MYA-4575 / FGSC 10137) GN=VDAG_02669 PE=4 SV=1	-	-
c18004_g1	11.5845	0	23.169	Inf	Inf	1.02e-10	5.36e-10	0	3.41	-	-	-	-	-	-	-	-	-	-	-
c18021_g1	80.8455	112.363	49.3275	0.439	-1.18771	3.5e-09	1.6e-08	37.49	16.8	-	-	-	2e-06 gnl|CDD|230284 KOG2345, KOG2345, KOG2345, Serine/threonine protein kinase/TGF-beta stimulated factor [Transcription, Lipid transport and metabolism, Signal transduction mechanisms].	9e-19 gb|EGY22861.1| serine/threonine-protein kinase [Verticillium dahliae VdLs.17]	-	-	-	1e-18 tr|G2X1X5|G2X1X5_VERDV Serine/threonine-protein kinase OS=Verticillium dahliae (strain VdLs.17 / ATCC MYA-4575 / FGSC 10137) GN=VDAG_04299 PE=3 SV=1	GO:0005524,ATP binding;GO:0004674,protein serine/threonine kinase activity	-
c18027_g1	27.6201	0.68099	54.5592	80.1175	6.32405	6.66e-16	5.31e-15	0.1	8.14	-	-	-	-	-	-	-	-	-	-	-
c18031_g1	13.4785	22.4727	4.48432	0.199545	-2.32521	3e-05	0.000101202	12.29	2.53	-	-	-	-	-	1e-69 ref|XM_002999701.1| Verticillium albo-atrum VaMs.102 pectate lyase, mRNA	-	-	-	-	-
c18037_g1	175.294	236.985	113.603	0.479368	-1.06079	4.25e-15	3.27e-14	19.08	9.19	VDBG_06626	vacuolar-sorting protein SNF8	1e-63 gnl|CDD|217934 pfam04157, EAP30, EAP30/Vps36 family. This family includes EAP30 as well as the Vps36 protein. Vps36 is involved in Golgi to endosome trafficking. EAP30 is a subunit of the ELL complex. The ELL is an 80-kDa RNA polymerase II transcription factor. ELL interacts with three other proteins to form the complex known as ELL complex. The ELL complex is capable of increasing that cat…	2e-79 gnl|CDD|231279 KOG3341, KOG3341, KOG3341, RNA polymerase II transcription factor complex subunit [Transcription].	6e-169 ref|XP_003003064.1| vacuolar-sorting protein SNF8 [Verticillium alfalfae VaMs.102] gb|EEY20516.1| vacuolar-sorting protein SNF8 [Verticillium alfalfae VaMs.102]	0.0 ref|XM_003003018.1| Verticillium albo-atrum VaMs.102 vacuolar-sorting protein SNF8, mRNA	3e-64 gnl|CDD|217934 pfam04157, EAP30, EAP30/Vps36 family. This family includes EAP30 as well as the Vps36 protein. Vps36 is involved in Golgi to endosome trafficking. EAP30 is a subunit of the ELL complex. The ELL is an 80-kDa RNA polymerase II transcription factor. ELL interacts with three other proteins to form the complex known as ELL complex. The ELL complex is capable of increasing that cat…	3e-62 sp|Q5RK19|SNF8_RAT Vacuolar-sorting protein SNF8 OS=Rattus norvegicus GN=Snf8 PE=1 SV=1	7e-169 tr|C9SP01|C9SP01_VERA1 Vacuolar-sorting protein SNF8 OS=Verticillium albo-atrum (strain VaMs.102 / ATCC MYA-4576 / FGSC 10136) GN=VDBG_06626 PE=4 SV=1	GO:0015031,protein transport;GO:0031902,late endosome membrane;GO:0006357,regulation of transcription from RNA polymerase II promoter;GO:0005667,transcription factor complex;GO:0006351,transcription, DNA-dependent	K12188-ko04144,Endocytosis
c18058_g1	58.4894	80.3568	36.622	0.455742	-1.13371	1.54e-06	5.81e-06	26.81	12.47	VDBG_07516	hypothetical protein	-	-	3e-60 ref|XP_003002057.1| predicted protein [Verticillium alfalfae VaMs.102] gb|EEY21406.1| predicted protein [Verticillium alfalfae VaMs.102]	8e-173 ref|XM_003002011.1| Verticillium albo-atrum VaMs.102 predicted protein, mRNA	-	-	4e-60 tr|C9SRJ1|C9SRJ1_VERA1 Predicted protein OS=Verticillium albo-atrum (strain VaMs.102 / ATCC MYA-4576 / FGSC 10136) GN=VDBG_07516 PE=4 SV=1	-	-
[truncated: 1,398 more rows]

## Sheet: V4_V9
Gene_id	baseMean	baseMeanA	baseMeanB	foldChange	log2FoldChange	pval	padj	SHZvd-4	SHZvd-9	Gene_name	Gene_descriptions	CDD	KOG	NR	NT	PFAM	Swissprot	TrEMBL	GO	KEGG
[truncated: 1,010 more rows]

## Sheet: V5_V9
Gene_id	baseMean	baseMeanA	baseMeanB	foldChange	log2FoldChange	pval	padj	SHZvd-5	SHZvd-9	Gene_name	Gene_descriptions	CDD	KOG	NR	NT	PFAM	Swissprot	TrEMBL	GO	KEGG
[truncated: 1,673 more rows]
