# Supplementary material for: Transcriptome sequencing of Verticillium dahliae from a cotton farm reveals positive correlation between virulence and tolerance of sugar-induced hyperosmosis
Source: PeerJ. 2019 Nov 11;7:e8035. doi: 10.7717/peerj.8035 (PMC6855202; doi:10.7717/peerj.8035)
Supplement: Table S3 [file peerj-07-8035-s004.xlsx]

## Sheet: primer list
Gene	Primer (5'-3')
c108 Forward	CACCATCAGCTACGCCAC
c108 Reverse	GGACGTCAACCTTCCTCAG
C1385 Forward	ACGGCCACCTTTAACCGC
C1385 Reverse	CCTCAACGTGGGCATCAAAG
c15969 Forward	TCACGCATATCTGGTTCAGC
c15969 Reverse	TTCTTGGTCAGGGCGATAAG
c270 Forward	GTCTACAACTACATGGTCTCCG
c270 Reverse	ATCTTGCCTCAGGTCTTGAAG
C5764 Forward	GAGTTCCAGCAGATGAGGGGC
C5764 Reverse	AAGCCGCAGGGTTTGTCG
c5961 Forward	AATGGAGACAGGCAACGAG
c5961 Reverse	CTTCTACACTCATAATCCCCTTCAG
β-tubulin Forward	CCTTTGCTCCATCCCTCCC
β-tubulin Reverse	GAACTGCTCGCCGATACGC
ITS PCR Primer	Primer (5'-3')
ITS1	CCGTAGGTGAACCTGCGG
ITS4	TCCTCCGCTTATTAATATGC

## Sheet: qRT-PCR data
Gene	V4				V5				V9
c1385_g1	28.73	27.86	36.86		31.56	31.27	31.75		32.49	32.24	32.27
c108_g1	35.6	35.34	35.7		29.5	29.45	29.57		25.73	25.72	25.69
c5961_g1	33.02	33.54	33.89		20.9	20.87	21.17		19.64	19.48	19.71
c270_g1	31.91	32.9	32.11		29.27	29.53	29.87		29.25	29.16	29.5
c5764_g1	26.78	26.79	26.71		24.84	24.72	24.8		22.24	22.27	22.24
c15969_g1	22.45	22.52	22.9		29.95	29.55	29.66		27.18	27.65	27.1
β-tubulin	21.16	23.16	22.32		20.91	20.87	20.87		19.2	19.25	19.33

## Sheet: Relative expression level
Gene	V5-V4			Average	stdev	V9-V4			Average	stdev	V9-V5			Average	stdev
c1385_g1	6.42338	7.63873	5.4768	6.51297	1.08375	1.03049	1.26868	1.31342	1.2042	0.15209	0.159689	0.1966	0.203533	0.186607	0.0235684
c108_g1	1.27162	1.28046	1.17827	1.24345	0.0566231	5.30248	5.52765	5.9656	5.59858	0.337201	4.26733	4.44854	4.80099	4.50562	0.271373
c5961_g1	1.33793	1.32869	1.07923	1.24861	0.146765	0.97942	1.13288	1.02101	1.04444	0.0793686	0.788218	0.911722	0.82169	0.840544	0.0638743
c270_g1	3.32495	2.7007	2.13366	2.71977	0.595873	1.03049	1.1355	0.948246	1.03808	0.0938596	0.385108	0.424352	0.354371	0.387944	0.0350765
c5764_g1	1.53333	1.62076	1.53333	1.56247	0.0504762	2.84153	2.88119	3.10947	2.94406	0.14461	1.81924	1.84463	1.99078	1.88488	0.092584
c15969_g1	4.69134	6.02099	5.57897	5.43043	0.677155	9.78112	7.31065	11.3137	9.46849	2.01976	1.81085	1.35347	2.09459	1.75297	0.373932
