# Supplementary material for: Transcriptome sequencing of Verticillium dahliae from a cotton farm reveals positive correlation between virulence and tolerance of sugar-induced hyperosmosis
Source: PeerJ. 2019 Nov 11;7:e8035. doi: 10.7717/peerj.8035 (PMC6855202; doi:10.7717/peerj.8035)
Supplement: Table S4 [file peerj-07-8035-s005.xlsx]

## Sheet: Sheet1
Gene_id	SHZvd-4	SHZvd-5	SHZvd-9	Gene_name	Gene_descriptions	CDD	KOG	NR	NT	PFAM	Swissprot	TrEMBL	GO	KEGG
c10260_g1	59.63	0.38	4.69	-	-	-	-	-	-	-	-	-	-	-
c1068_g1	211.05	22.96	93.65	-	-	4e-67 gnl|CDD|227563 COG5238, RNA1, Ran GTPase-activating protein (RanGAP) involved in mRNA processing and transport [Signal transduction mechanisms / RNA processing and modification].	6e-67 gnl|CDD|229848 KOG1909, KOG1909, KOG1909, Ran GTPase-activating protein [RNA processing and modification, Nuclear structure, Signal transduction mechanisms].	2e-136 gb|ELA34683.1| ran gtpase activating protein 1 [Colletotrichum gloeosporioides Nara gc5]	0.0 ref|XM_003656769.1| Thielavia terrestris NRRL 8126 hypothetical protein (THITE_2121985) mRNA, complete cds	-	2e-71 sp|P41391|RNA1_SCHPO Ran GTPase-activating protein 1 OS=Schizosaccharomyces pombe (strain 972 / ATCC 24843) GN=rna1 PE=1 SV=1	2e-136 tr|L2G9H5|L2G9H5_COLGN Ran gtpase activating protein 1 OS=Colletotrichum gloeosporioides (strain Nara gc5) GN=CGGC5_5528 PE=4 SV=1	GO:0030702,chromatin silencing at centromere;GO:0000070,mitotic sister chromatid segregation;GO:0005829,cytosol;GO:0046827,positive regulation of protein export from nucleus;GO:0031965,nuclear membrane;GO:0005098,Ran GTPase activator activity;GO:0048471,perinuclear region of cytoplasm;GO:0006913,nucleocytoplasmic transport;GO:0051383,kinetochore organization	K14319-ko03013,RNA transport
c108_g1	15	37.14	674.66	-	-	1e-80 gnl|CDD|214473 smart00020, Tryp_SPc, Trypsin-like serine protease. Many of these are synthesised as inactive precursor zymogens that are cleaved during limited proteolysis to generate their active forms. A few, however, are active as single chain molecules, and others are inactive due to substitutions of the catalytic triad residues.	1e-57 gnl|CDD|231561 KOG3627, KOG3627, KOG3627, Trypsin [Amino acid transport and metabolism].	2e-156 gb|AAR06593.1| extracellular trypsin protease [Verticillium dahliae] gb|EGY14486.1| trypsin [Verticillium dahliae VdLs.17]	0.0 ref|XM_003002187.1| Verticillium albo-atrum VaMs.102 trypsin, mRNA	1e-58 gnl|CDD|215708 pfam00089, Trypsin, Trypsin.	8e-76 sp|P35049|TRYP_FUSOX Trypsin OS=Fusarium oxysporum PE=1 SV=1	3e-156 tr|Q6V1Q1|Q6V1Q1_VERDA Extracellular trypsin protease OS=Verticillium dahliae GN=VTP1 PE=3 SV=1	GO:0005576,extracellular region;GO:0004252,serine-type endopeptidase activity;GO:0006508,proteolysis	K01312-ko04080,Neuroactive ligand-receptor interaction;ko04972,Pancreatic secretion;ko04974,Protein digestion and absorption;ko05164,Influenza A
c11263_g1	65.24	24.02	313.18	VDBG_06210	hypothetical protein	-	-	0.0 ref|XP_003003768.1| conserved hypothetical protein [Verticillium alfalfae VaMs.102] gb|EEY20101.1| conserved hypothetical protein [Verticillium alfalfae VaMs.102]	0.0 ref|XM_003003722.1| Verticillium albo-atrum VaMs.102 conserved hypothetical protein, mRNA	-	-	0.0 tr|C9SMT6|C9SMT6_VERA1 Putative uncharacterized protein OS=Verticillium albo-atrum (strain VaMs.102 / ATCC MYA-4576 / FGSC 10136) GN=VDBG_06210 PE=4 SV=1	-	-
c11277_g1	44.15	228.96	476.06	-	-	3e-46 gnl|CDD|216469 pfam01384, PHO4, Phosphate transporter family. This family includes PHO-4 from Neurospora crassa which is a is a Na(+)-phosphate symporter. This family also contains the leukaemia virus receptor.	5e-44 gnl|CDD|230432 KOG2493, KOG2493, KOG2493, Na+/Pi symporter [Inorganic ion transport and metabolism].	0.0 gb|EGY16419.1| phosphate-repressible phosphate permease [Verticillium dahliae VdLs.17]	0.0 ref|XM_003004485.1| Verticillium albo-atrum VaMs.102 phosphate transporter family protein, mRNA	6e-47 gnl|CDD|216469 pfam01384, PHO4, Phosphate transporter family. This family includes PHO-4 from Neurospora crassa which is a is a Na(+)-phosphate symporter. This family also contains the leukaemia virus receptor.	1e-86 sp|P15710|PHO4_NEUCR Phosphate-repressible phosphate permease OS=Neurospora crassa (strain ATCC 24698 / 74-OR23-1A / CBS 708.71 / DSM 1257 / FGSC 987) GN=pho-4 PE=3 SV=1	0.0 tr|G2XC05|G2XC05_VERDV Phosphate-repressible phosphate permease OS=Verticillium dahliae (strain VdLs.17 / ATCC MYA-4575 / FGSC 10137) GN=VDAG_07583 PE=4 SV=1	GO:0016020,membrane;GO:0015293,symporter activity;GO:0016021,integral to membrane;GO:0006817,phosphate ion transport;GO:0005315,inorganic phosphate transmembrane transporter activity	K14640
c11362_g1	26.34	105.05	12.62	-	-	1e-13 gnl|CDD|214884 smart00886, Dabb, Stress responsive A/B Barrel Domain. The function of this domain is unknown, but it is upregulated in response to salt stress in Populus balsamifera (balsam poplar). It is also found at the C-terminus of a fructose 1,6-bisphosphate aldolase from Hydrogenophilus thermoluteolus.It is found in the pA01 plasmid, which encodes genes for molybdopterin uptake and d…	-	6e-72 gb|EGY19535.1| hypothetical protein VDAG_09869 [Verticillium dahliae VdLs.17]	-	5e-12 gnl|CDD|219615 pfam07876, Dabb, Stress responsive A/B Barrel Domain. The function of this family is unknown, but it is upregulated in response to salt stress in Populus balsamifera. It is also found at the C-terminus of an fructose 1,6-bisphosphate aldolase from Hydrogenophilus thermoluteolus. Arthrobacter nicotinovorans ORF106 is found in the pA01 plasmid, which encodes genes for molybdopt…	-	7e-72 tr|G2XI87|G2XI87_VERDV Putative uncharacterized protein OS=Verticillium dahliae (strain VdLs.17 / ATCC MYA-4575 / FGSC 10137) GN=VDAG_09869 PE=4 SV=1	-	-
c11399_g1	101.6	233.01	12.03	-	-	2e-75 gnl|CDD|215702 pfam00083, Sugar_tr, Sugar (and other) transporter.	1e-65 gnl|CDD|228203 KOG0254, KOG0254, KOG0254, Predicted transporter (major facilitator superfamily) [General function prediction only].	0.0 gb|EGY15384.1| lactose permease [Verticillium dahliae VdLs.17]	0.0 ref|XM_002999859.1| Verticillium albo-atrum VaMs.102 lactose permease, mRNA	5e-76 gnl|CDD|215702 pfam00083, Sugar_tr, Sugar (and other) transporter.	7e-80 sp|P07921|LACP_KLULA Lactose permease OS=Kluyveromyces lactis (strain ATCC 8585 / CBS 2359 / DSM 70799 / NBRC 1267 / NRRL Y-1140 / WM37) GN=LAC12 PE=3 SV=1	0.0 tr|G2X8U7|G2X8U7_VERDV Lactose permease OS=Verticillium dahliae (strain VdLs.17 / ATCC MYA-4575 / FGSC 10137) GN=VDAG_06238 PE=3 SV=1	GO:0015293,symporter activity;GO:0016021,integral to membrane;GO:0022891,substrate-specific transmembrane transporter activity;GO:0008643,carbohydrate transport	-
c11489_g1	70.67	459.25	33.74	-	-	-	-	5e-14 emb|CCF37684.1| hypothetical protein CH063_01746 [Colletotrichum higginsianum]	-	-	-	5e-14 tr|H1VBT1|H1VBT1_COLHI Uncharacterized protein OS=Colletotrichum higginsianum (strain IMI 349063) GN=CH063_01746 PE=4 SV=1	-	-
c11623_g1	7.77	0	1.63	-	-	-	-	-	-	-	-	-	-	-
c11696_g1	18.65	3.61	149.17	-	-	-	-	6e-119 gb|EGY21874.1| hypothetical protein VDAG_03314 [Verticillium dahliae VdLs.17]	2e-145 ref|XM_003003668.1| Verticillium albo-atrum VaMs.102 predicted protein, mRNA	-	-	7e-119 tr|G2WZ72|G2WZ72_VERDV Putative uncharacterized protein OS=Verticillium dahliae (strain VdLs.17 / ATCC MYA-4575 / FGSC 10137) GN=VDAG_03314 PE=4 SV=1	-	-
c1177_g1	8.9	3.64	28.59	-	-	9e-152 gnl|CDD|236177 PRK08186, PRK08186, allophanate hydrolase; Provisional.	6e-45 gnl|CDD|229153 KOG1211, KOG1211, KOG1211, Amidases [Translation, ribosomal structure and biogenesis].	0.0 gb|EGY14195.1| glutamyl-tRNA(Gln) amidotransferase subunit A [Verticillium dahliae VdLs.17]	0.0 ref|XM_002999716.1| Verticillium albo-atrum VaMs.102 glutamyl-tRNA(Gln) amidotransferase subunit A, mRNA	3e-64 gnl|CDD|216494 pfam01425, Amidase, Amidase.	1e-75 sp|Q936X2|ATZF_PSESD Allophanate hydrolase OS=Pseudomonas sp. (strain ADP) GN=atzF PE=1 SV=1	0.0 tr|G2X643|G2X643_VERDV Glutamyl-tRNA(Gln) amidotransferase subunit A OS=Verticillium dahliae (strain VdLs.17 / ATCC MYA-4575 / FGSC 10137) GN=VDAG_05359 PE=4 SV=1	GO:0016740,transferase activity;GO:0019381,atrazine catabolic process;GO:0016884,carbon-nitrogen ligase activity, with glutamine as amido-N-donor;GO:0004039,allophanate hydrolase activity	-
c12615_g1	20.37	0.42	6.33	VDBG_09923	hypothetical protein	-	-	5e-20 ref|XP_002999883.1| conserved hypothetical protein [Verticillium alfalfae VaMs.102] gb|EEY23813.1| conserved hypothetical protein [Verticillium alfalfae VaMs.102]	1e-129 ref|XM_002999837.1| Verticillium albo-atrum VaMs.102 conserved hypothetical protein, mRNA	-	-	6e-20 tr|C9SYE8|C9SYE8_VERA1 Putative uncharacterized protein OS=Verticillium albo-atrum (strain VaMs.102 / ATCC MYA-4576 / FGSC 10136) GN=VDBG_09923 PE=4 SV=1	GO:0000981,sequence-specific DNA binding RNA polymerase II transcription factor activity;GO:0003677,DNA binding;GO:0006357,regulation of transcription from RNA polymerase II promoter;GO:0008270,zinc ion binding;GO:0005634,nucleus;GO:0006366,transcription from RNA polymerase II promoter;GO:0046872,metal ion binding	-
c1302_g1	2.69	1.08	236.37	VDBG_06184	phosphate-repressible phosphate permease	6e-32 gnl|CDD|216469 pfam01384, PHO4, Phosphate transporter family. This family includes PHO-4 from Neurospora crassa which is a is a Na(+)-phosphate symporter. This family also contains the leukaemia virus receptor.	2e-43 gnl|CDD|230432 KOG2493, KOG2493, KOG2493, Na+/Pi symporter [Inorganic ion transport and metabolism].	0.0 ref|XP_003003742.1| phosphate-repressible phosphate permease [Verticillium alfalfae VaMs.102] gb|EEY20075.1| phosphate-repressible phosphate permease [Verticillium alfalfae VaMs.102]	0.0 ref|XM_003003696.1| Verticillium albo-atrum VaMs.102 phosphate-repressible phosphate permease, mRNA	1e-32 gnl|CDD|216469 pfam01384, PHO4, Phosphate transporter family. This family includes PHO-4 from Neurospora crassa which is a is a Na(+)-phosphate symporter. This family also contains the leukaemia virus receptor.	0.0 sp|P15710|PHO4_NEUCR Phosphate-repressible phosphate permease OS=Neurospora crassa (strain ATCC 24698 / 74-OR23-1A / CBS 708.71 / DSM 1257 / FGSC 987) GN=pho-4 PE=3 SV=1	0.0 tr|C9SMR0|C9SMR0_VERA1 Phosphate-repressible phosphate permease OS=Verticillium albo-atrum (strain VaMs.102 / ATCC MYA-4576 / FGSC 10136) GN=VDBG_06184 PE=4 SV=1	GO:0016020,membrane;GO:0006817,phosphate ion transport;GO:0015293,symporter activity;GO:0016021,integral to membrane;GO:0005315,inorganic phosphate transmembrane transporter activity	K14640
c13400_g1	2013.57	55.59	494.28	-	-	-	-	3e-59 gb|EGY23679.1| surface protein [Verticillium dahliae VdLs.17]	3e-13 ref|XM_001907591.1| Podospora anserina S mat+ hypothetical protein (PODANSg4660) partial mRNA	-	-	3e-59 tr|G2X4N5|G2X4N5_VERDV Surface protein OS=Verticillium dahliae (strain VdLs.17 / ATCC MYA-4575 / FGSC 10137) GN=VDAG_05117 PE=4 SV=1	-	-
c13469_g1	256.32	3.73	45.1	VDBG_05252	hypothetical protein	-	-	0.0 ref|XP_003004139.1| conserved hypothetical protein [Verticillium alfalfae VaMs.102] gb|EEY19143.1| conserved hypothetical protein [Verticillium alfalfae VaMs.102]	0.0 ref|XM_003004093.1| Verticillium albo-atrum VaMs.102 conserved hypothetical protein, mRNA	-	-	0.0 tr|C9SKC5|C9SKC5_VERA1 Putative uncharacterized protein OS=Verticillium albo-atrum (strain VaMs.102 / ATCC MYA-4576 / FGSC 10136) GN=VDBG_05252 PE=4 SV=1	-	-
c13495_g1	2.25	23.26	5.18	-	-	2e-99 gnl|CDD|233165 TIGR00879, SP, MFS transporter, sugar porter (SP) family. This model represent the sugar porter subfamily of the major facilitator superfamily (pfam00083) [Transport and binding proteins, Carbohydrates, organic alcohols, and acids].	4e-79 gnl|CDD|228203 KOG0254, KOG0254, KOG0254, Predicted transporter (major facilitator superfamily) [General function prediction only].	0.0 gb|EGY17122.1| alpha-glucosides permease MPH2/3 [Verticillium dahliae VdLs.17]	0.0 ref|XM_003001526.1| Verticillium albo-atrum VaMs.102 maltose permease MAL61, mRNA	1e-89 gnl|CDD|215702 pfam00083, Sugar_tr, Sugar (and other) transporter.	2e-106 sp|P53048|MAL11_YEAST General alpha-glucoside permease OS=Saccharomyces cerevisiae (strain ATCC 204508 / S288c) GN=MAL11 PE=1 SV=1	0.0 tr|G2XDQ4|G2XDQ4_VERDV Alpha-glucosides permease MPH2/3 OS=Verticillium dahliae (strain VdLs.17 / ATCC MYA-4575 / FGSC 10137) GN=VDAG_08286 PE=3 SV=1	GO:0000023,maltose metabolic process;GO:0005364,maltose:hydrogen symporter activity;GO:0015574,trehalose transmembrane transporter activity;GO:0005352,alpha-glucoside:hydrogen symporter activity;GO:0022891,substrate-specific transmembrane transporter activity;GO:0046352,disaccharide catabolic process;GO:0016021,integral to membrane;GO:0005886,plasma membrane	K08141
c13830_g1	7.72	45.14	2.36	-	-	-	-	6e-15 gb|EGY15096.1| hypothetical protein VDAG_06586 [Verticillium dahliae VdLs.17]	-	-	-	8e-15 tr|G2X7X8|G2X7X8_VERDV Putative uncharacterized protein OS=Verticillium dahliae (strain VdLs.17 / ATCC MYA-4575 / FGSC 10137) GN=VDAG_06586 PE=4 SV=1	-	-
c1385_g1	1.13	23.79	10.34	-	-	1e-13 gnl|CDD|214614 smart00317, SET, SET (Su(var)3-9, Enhancer-of-zeste, Trithorax) domain. Putative methyl transferase, based on outlier plant homologues.	1e-12 gnl|CDD|232371 KOG4442, KOG4442, KOG4442, Clathrin coat binding protein/Huntingtin interacting protein HIP1, involved in regulation of endocytosis [Intracellular trafficking, secretion, and vesicular transport].	0.0 gb|EGY21913.1| SET domain-containing protein [Verticillium dahliae VdLs.17]	0.0 ref|XM_003003716.1| Verticillium albo-atrum VaMs.102 SET domain-containing protein, mRNA	3e-13 gnl|CDD|216155 pfam00856, SET, SET domain. SET domains are protein lysine methyltransferase enzymes. SET domains appear to be protein-protein interaction domains. It has been demonstrated that SET domains mediate interactions with a family of proteins that display similarity with dual-specificity phosphatases (dsPTPases). A subset of SET domains have been called PR domains. These domains ar…	0.0 sp|P0CY36|Y1806_PHANO SET domain-containing protein SNOG_11806 OS=Phaeosphaeria nodorum (strain SN15 / ATCC MYA-4574 / FGSC 10173) GN=SNOG_11806 PE=3 SV=1	0.0 tr|G2WZB1|G2WZB1_VERDV SET domain-containing protein OS=Verticillium dahliae (strain VdLs.17 / ATCC MYA-4575 / FGSC 10137) GN=VDAG_03353 PE=4 SV=1	-	K14778
c14062_g1	24.22	0.78	10.54	-	-	-	-	5e-50 gb|EGY14477.1| hypothetical protein VDAG_05641 [Verticillium dahliae VdLs.17]	3e-152 ref|XM_003002198.1| Verticillium albo-atrum VaMs.102 predicted protein, mRNA	-	-	6e-50 tr|G2X659|G2X659_VERDV Putative uncharacterized protein OS=Verticillium dahliae (strain VdLs.17 / ATCC MYA-4575 / FGSC 10137) GN=VDAG_05641 PE=4 SV=1	-	-
c14577_g1	184.87	2.22	31.73	-	-	-	-	-	-	-	-	-	-	-
c14833_g1	437	29.9	159.27	-	-	-	-	-	2e-57 gb|CP003014.1| Thielavia terrestris NRRL 8126 chromosome 6, complete sequence	-	-	-	-	-
c15603_g1	85.26	28.97	234.82	-	-	-	-	2e-63 gb|EGY14075.1| hypothetical protein VDAG_00757 [Verticillium dahliae VdLs.17]	5e-120 ref|XM_003009421.1| Verticillium albo-atrum VaMs.102 conserved hypothetical protein, mRNA	-	-	2e-63 tr|G2WQW5|G2WQW5_VERDV Putative uncharacterized protein OS=Verticillium dahliae (strain VdLs.17 / ATCC MYA-4575 / FGSC 10137) GN=VDAG_00757 PE=4 SV=1	-	-
c15612_g1	210.95	1510.41	12.44	VDBG_03945	hypothetical protein	-	-	3e-69 ref|XP_003005992.1| conserved hypothetical protein [Verticillium alfalfae VaMs.102] gb|EEY17836.1| conserved hypothetical protein [Verticillium alfalfae VaMs.102] gb|EGY17490.1| hypothetical protein VDAG_01172 [Verticillium dahliae VdLs.17]	3e-149 ref|XM_003005946.1| Verticillium albo-atrum VaMs.102 conserved hypothetical protein, mRNA	-	-	4e-69 tr|G2WTP9|G2WTP9_VERDV Putative uncharacterized protein OS=Verticillium dahliae (strain VdLs.17 / ATCC MYA-4575 / FGSC 10137) GN=VDAG_01172 PE=4 SV=1	-	-
c15653_g1	34.64	13.68	97.16	-	-	-	-	3e-124 gb|EGY21831.1| hypothetical protein VDAG_03271 [Verticillium dahliae VdLs.17]	0.0 ref|XM_003003625.1| Verticillium albo-atrum VaMs.102 conserved hypothetical protein, mRNA	-	-	4e-124 tr|G2WZ29|G2WZ29_VERDV Putative uncharacterized protein OS=Verticillium dahliae (strain VdLs.17 / ATCC MYA-4575 / FGSC 10137) GN=VDAG_03271 PE=4 SV=1	-	-
c15660_g1	95.57	10.17	22.95	-	-	6e-143 gnl|CDD|237337 PRK13289, PRK13289, bifunctional nitric oxide dioxygenase/dihydropteridine reductase 2; Provisional.	1e-64 gnl|CDD|231316 KOG3378, KOG3378, KOG3378, Hemoglobin-like flavoprotein [Energy production and conversion].	0.0 gb|EGY15329.1| hemoglobin [Verticillium dahliae VdLs.17]	7e-150 ref|XM_002999811.1| Verticillium albo-atrum VaMs.102 bacterial hemoglobin, mRNA	6e-07 gnl|CDD|215673 pfam00042, Globin, Globin.	2e-83 sp|Q9RYR5|HMP_DEIRA Flavohemoprotein OS=Deinococcus radiodurans (strain ATCC 13939 / DSM 20539 / JCM 16871 / LMG 4051 / NBRC 15346 / NCIMB 9279 / R1 / VKM B-1422) GN=hmp PE=3 SV=1	0.0 tr|G2X8P2|G2X8P2_VERDV Hemoglobin OS=Verticillium dahliae (strain VdLs.17 / ATCC MYA-4575 / FGSC 10137) GN=VDAG_06183 PE=3 SV=1	GO:0009055,electron carrier activity;GO:0020037,heme binding;GO:0051409,response to nitrosative stress;GO:0005506,iron ion binding;GO:0019825,oxygen binding;GO:0016491,oxidoreductase activity;GO:0071949,FAD binding;GO:0008941,nitric oxide dioxygenase activity;GO:0005344,oxygen transporter activity	K05916-ko05132,Salmonella infection
c15701_g1	18	0.97	8.49	-	-	2e-38 gnl|CDD|233851 TIGR02403, trehalose_treC, alpha,alpha-phosphotrehalase. Trehalose is a glucose disaccharide that serves in many biological systems as a compatible solute for protection against hyperosmotic and thermal stress. This family describes trehalose-6-phosphate hydrolase, product of the treC (or treA) gene, which is often found together with a trehalose uptake transporter and a treh…	1e-15 gnl|CDD|228420 KOG0471, KOG0471, KOG0471, Alpha-amylase [Carbohydrate transport and metabolism].	2e-145 gb|EGY14214.1| alpha-glucosidase [Verticillium dahliae VdLs.17]	0.0 ref|XM_002999738.1| Verticillium albo-atrum VaMs.102 alpha-glucosidase, mRNA	-	2e-35 sp|Q02751|MALT_CANAX Alpha-glucosidase OS=Candida albicans GN=MAL2 PE=1 SV=4	2e-145 tr|G2X573|G2X573_VERDV Alpha-glucosidase OS=Verticillium dahliae (strain VdLs.17 / ATCC MYA-4575 / FGSC 10137) GN=VDAG_05378 PE=4 SV=1	GO:0000023,maltose metabolic process;GO:0032450,maltose alpha-glucosidase activity;GO:0003824,catalytic activity;GO:0043169,cation binding;GO:0005975,carbohydrate metabolic process	-
c15847_g1	2.36	26.99	6.74	-	-	7e-88 gnl|CDD|215702 pfam00083, Sugar_tr, Sugar (and other) transporter.	8e-78 gnl|CDD|228203 KOG0254, KOG0254, KOG0254, Predicted transporter (major facilitator superfamily) [General function prediction only].	0.0 gb|EGY20362.1| quinate permease [Verticillium dahliae VdLs.17]	0.0 ref|XM_003007199.1| Verticillium albo-atrum VaMs.102 quinate permease, mRNA	2e-88 gnl|CDD|215702 pfam00083, Sugar_tr, Sugar (and other) transporter.	5e-68 sp|A2QQV6|QUTD_ASPNC Probable quinate permease OS=Aspergillus niger (strain CBS 513.88 / FGSC A1513) GN=qutD PE=3 SV=1	0.0 tr|G2XIK9|G2XIK9_VERDV Quinate permease OS=Verticillium dahliae (strain VdLs.17 / ATCC MYA-4575 / FGSC 10137) GN=VDAG_09991 PE=3 SV=1	GO:0022891,substrate-specific transmembrane transporter activity;GO:0019630,quinate metabolic process;GO:0016021,integral to membrane;GO:0005886,plasma membrane	-
c15969_g1	1.45	14.35	37.58	-	-	0.0 gnl|CDD|223903 COG0833, LysP, Amino acid transporters [Amino acid transport and metabolism].	8e-149 gnl|CDD|229228 KOG1286, KOG1286, KOG1286, Amino acid transporters [Amino acid transport and metabolism].	0.0 gb|EGY21485.1| dicarboxylic amino acid permease [Verticillium dahliae VdLs.17]	0.0 ref|XM_003049723.1| Nectria haematococca mpVI 77-13-4 hypothetical protein, mRNA	5e-122 gnl|CDD|215858 pfam00324, AA_permease, Amino acid permease.	5e-163 sp|P53388|DIP5_YEAST Dicarboxylic amino acid permease OS=Saccharomyces cerevisiae (strain ATCC 204508 / S288c) GN=DIP5 PE=1 SV=1	0.0 tr|G2XJY5|G2XJY5_VERDV Dicarboxylic amino acid permease OS=Verticillium dahliae (strain VdLs.17 / ATCC MYA-4575 / FGSC 10137) GN=VDAG_10467 PE=4 SV=1	GO:0016021,integral to membrane;GO:0005886,plasma membrane;GO:0015171,amino acid transmembrane transporter activity	K16261
c16014_g1	10.25	1.43	4.23	-	-	-	-	-	-	-	-	-	-	-
c16023_g1	39.49	2.96	18.44	-	-	-	-	-	-	-	-	-	-	-
c16051_g1	25.17	10.72	117.6	-	-	-	-	2e-37 gb|EGY21158.1| hypothetical protein VDAG_02682 [Verticillium dahliae VdLs.17]	3e-93 ref|XM_003007977.1| Verticillium albo-atrum VaMs.102 conserved hypothetical protein, mRNA	-	-	2e-37 tr|G2WYK0|G2WYK0_VERDV Putative uncharacterized protein OS=Verticillium dahliae (strain VdLs.17 / ATCC MYA-4575 / FGSC 10137) GN=VDAG_02682 PE=4 SV=1	-	-
c16192_g1	15.74	1.49	6.06	-	-	-	-	-	-	-	-	-	-	-
c16472_g1	9.68	3.3	22.77	-	-	-	-	-	-	-	-	-	-	-
c1663_g1	1585.44	87.31	291.73	-	-	1e-21 gnl|CDD|203602 pfam07249, Cerato-platanin, Cerato-platanin. This family contains a number of fungal cerato-platanin phytotoxic proteins approximately 150 residues long. Cerato-platanin contains four cysteine residues that form two disulphide bonds.	-	2e-44 gb|EJT76087.1| SnodProt1, partial [Gaeumannomyces graminis var. tritici R3-111a-1]	4e-102 ref|XM_002999825.1| Verticillium albo-atrum VaMs.102 SnodProt1, mRNA	3e-22 gnl|CDD|203602 pfam07249, Cerato-platanin, Cerato-platanin. This family contains a number of fungal cerato-platanin phytotoxic proteins approximately 150 residues long. Cerato-platanin contains four cysteine residues that form two disulphide bonds.	7e-35 sp|O74238|SNP1_PHANO Protein SnodProt1 OS=Phaeosphaeria nodorum (strain SN15 / ATCC MYA-4574 / FGSC 10173) GN=SNOG_13722 PE=2 SV=1	4e-45 tr|M4FVV8|M4FVV8_MAGP6 Uncharacterized protein OS=Magnaporthe poae (strain ATCC 64411 / 73-15) PE=4 SV=1	GO:0005576,extracellular region	-
c1671_g1	465.67	23	116.35	-	-	5e-15 gnl|CDD|201070 pfam00191, Annexin, Annexin. This family of annexins also includes giardin that has been shown to function as an annexin.	9e-57 gnl|CDD|228765 KOG0819, KOG0819, KOG0819, Annexin [Intracellular trafficking, secretion, and vesicular transport].	0.0 gb|EGY21941.1| annexin-B11 [Verticillium dahliae VdLs.17]	0.0 ref|XM_003003739.1| Verticillium albo-atrum VaMs.102 annexin-B9, mRNA	1e-15 gnl|CDD|201070 pfam00191, Annexin, Annexin. This family of annexins also includes giardin that has been shown to function as an annexin.	2e-44 sp|P20073|ANXA7_HUMAN Annexin A7 OS=Homo sapiens GN=ANXA7 PE=1 SV=3	0.0 tr|G2WZD9|G2WZD9_VERDV Annexin OS=Verticillium dahliae (strain VdLs.17 / ATCC MYA-4575 / FGSC 10137) GN=VDAG_03381 PE=3 SV=1	GO:0031982,vesicle;GO:0007599,hemostasis;GO:0035176,social behavior;GO:0009992,cellular water homeostasis;GO:0008360,regulation of cell shape;GO:0005544,calcium-dependent phospholipid binding;GO:0005635,nuclear envelope;GO:0008283,cell proliferation;GO:0005829,cytosol;GO:0009651,response to salt stress;GO:0006874,cellular calcium ion homeostasis;GO:0005886,plasma membrane;GO:0005509,calcium ion b…	K17095
c1703_g1	2.71	1.04	14.98	-	-	3e-06 gnl|CDD|221718 pfam12695, Abhydrolase_5, Alpha/beta hydrolase family. This family contains a diverse range of alpha/beta hydrolase enzymes.	5e-12 gnl|CDD|229493 KOG1552, KOG1552, KOG1552, Predicted alpha/beta hydrolase [General function prediction only].	6e-134 gb|EGY14248.1| abhydrolase domain-containing protein 12B [Verticillium dahliae VdLs.17]	0.0 ref|XM_003001542.1| Verticillium albo-atrum VaMs.102 abhydrolase domain-containing protein, mRNA	7e-07 gnl|CDD|221718 pfam12695, Abhydrolase_5, Alpha/beta hydrolase family. This family contains a diverse range of alpha/beta hydrolase enzymes.	2e-10 sp|Q8Z4M8|YHFR_SALTI Uncharacterized protein YfhR OS=Salmonella typhi GN=yhfR PE=3 SV=1	7e-134 tr|G2X5A7|G2X5A7_VERDV Abhydrolase domain-containing protein 12B OS=Verticillium dahliae (strain VdLs.17 / ATCC MYA-4575 / FGSC 10137) GN=VDAG_05412 PE=4 SV=1	GO:0016787,hydrolase activity;GO:0016021,integral to membrane	K13704
c17471_g1	18.92	69.06	188.64	-	-	1e-83 gnl|CDD|173790 cd04077, Peptidases_S8_PCSK9_ProteinaseK_like, Peptidase S8 family domain in ProteinaseK-like proteins. The peptidase S8 or Subtilase clan of proteases have a Asp/His/Ser catalytic triad that is not homologous to trypsin. This CD contains several members of this clan including: PCSK9 (Proprotein convertase subtilisin/kexin type 9), Proteinase_K, Proteinase_T, and other subtil…	1e-65 gnl|CDD|229096 KOG1153, KOG1153, KOG1153, Subtilisin-related protease/Vacuolar protease B [Posttranslational modification, protein turnover, chaperones].	0.0 gb|EGY15113.1| alkaline proteinase [Verticillium dahliae VdLs.17]	0.0 gb|AY356397.1| Verticillium dahliae strain Dvd-T5 subtilisin-like protease (VSP1) mRNA, complete cds	4e-34 gnl|CDD|215701 pfam00082, Peptidase_S8, Subtilase family. Subtilases are a family of serine proteases. They appear to have independently and convergently evolved an Asp/Ser/His catalytic triad, like that found in the trypsin serine proteases (see pfam00089). Structure is an alpha/beta fold containing a 7-stranded parallel beta sheet, order 2314567.	1e-113 sp|Q03420|ALP_HYPAT Alkaline proteinase OS=Hypocrea atroviridis GN=prb1 PE=1 SV=1	0.0 tr|G2X826|G2X826_VERDV Alkaline proteinase OS=Verticillium dahliae (strain VdLs.17 / ATCC MYA-4575 / FGSC 10137) GN=VDAG_05967 PE=3 SV=1	GO:0006508,proteolysis;GO:0043086,negative regulation of catalytic activity;GO:0005576,extracellular region;GO:0004252,serine-type endopeptidase activity	K18549
c17484_g1	634.73	1834.87	135.33	-	-	2e-80 gnl|CDD|223809 COG0738, FucP, Fucose permease [Carbohydrate transport and metabolism].	-	0.0 gb|EGY17017.1| L-fucose transporter [Verticillium dahliae VdLs.17]	0.0 ref|XM_003001426.1| Verticillium albo-atrum VaMs.102 L-fucose permease, mRNA	1e-10 gnl|CDD|219516 pfam07690, MFS_1, Major Facilitator Superfamily.	2e-40 sp|P0C105|GLUP_BRUAB Glucose/galactose transporter OS=Brucella abortus biovar 1 (strain 9-941) GN=gluP PE=3 SV=1	0.0 tr|G2XDE9|G2XDE9_VERDV L-fucose transporter OS=Verticillium dahliae (strain VdLs.17 / ATCC MYA-4575 / FGSC 10137) GN=VDAG_08181 PE=4 SV=1	GO:0009276,Gram-negative-bacterium-type cell wall;GO:0005354,galactose transmembrane transporter activity;GO:0005355,glucose transmembrane transporter activity;GO:0016021,integral to membrane;GO:0005886,plasma membrane	K02429
c17541_g1	603.38	11.9	88.79	-	-	7e-155 gnl|CDD|239243 cd02933, OYE_like_FMN, Old yellow enzyme (OYE)-like FMN binding domain. OYE was the first flavin-dependent enzyme identified, however its true physiological role remains elusive to this day. Each monomer of OYE contains FMN as a non-covalently bound cofactor, uses NADPH as a reducing agent with oxygens, quinones, and alpha,beta-unsaturated aldehydes and ketones, and can act …	5e-84 gnl|CDD|228084 KOG0134, KOG0134, KOG0134, NADH:flavin oxidoreductase/12-oxophytodienoate reductase [Energy production and conversion, General function prediction only].	0.0 gb|EGY22582.1| NADPH dehydrogenase [Verticillium dahliae VdLs.17]	0.0 ref|XM_003006928.1| Verticillium albo-atrum VaMs.102 12-oxophytodienoate reductase, mRNA	3e-91 gnl|CDD|216083 pfam00724, Oxidored_FMN, NADH:flavin oxidoreductase / NADH oxidase family.	6e-98 sp|Q4WZ70|OYE3_ASPFU Chanoclavine-I aldehyde reductase OS=Neosartorya fumigata (strain ATCC MYA-4609 / Af293 / CBS 101355 / FGSC A1100) GN=fgaOx3 PE=1 SV=1	0.0 tr|G2X191|G2X191_VERDV NADPH dehydrogenase OS=Verticillium dahliae (strain VdLs.17 / ATCC MYA-4575 / FGSC 10137) GN=VDAG_04020 PE=4 SV=1	GO:0018548,pentaerythritol trinitrate reductase activity;GO:0052690,trichloro-p-hydroquinone reductive dehalogenase activity;GO:0010181,FMN binding;GO:0003959,NADPH dehydrogenase activity;GO:0016491,oxidoreductase activity	K00354
c17584_g1	16.9	230.43	5.27	-	-	2e-29 gnl|CDD|221610 pfam12505, DUF3712, Protein of unknown function (DUF3712). This domain family is found in eukaryotes, and is approximately 130 amino acids in length.	-	0.0 gb|EGY22914.1| hypothetical protein VDAG_04352 [Verticillium dahliae VdLs.17]	0.0 ref|XM_003005160.1| Verticillium albo-atrum VaMs.102 conserved hypothetical protein, mRNA	4e-30 gnl|CDD|221610 pfam12505, DUF3712, Protein of unknown function (DUF3712). This domain family is found in eukaryotes, and is approximately 130 amino acids in length.	-	0.0 tr|G2X228|G2X228_VERDV Putative uncharacterized protein OS=Verticillium dahliae (strain VdLs.17 / ATCC MYA-4575 / FGSC 10137) GN=VDAG_04352 PE=4 SV=1	-	-
c17690_g1	44.47	103.84	11.11	-	-	6e-161 gnl|CDD|191210 pfam05153, DUF706, Family of unknown function (DUF706). Family of uncharacterized eukaryotic function. Some members have a described putative function, but a common theme is not evident.	1e-67 gnl|CDD|229514 KOG1573, KOG1573, KOG1573, Aldehyde reductase [General function prediction only].	0.0 gb|EGY17003.1| inositol oxygenase [Verticillium dahliae VdLs.17]	0.0 ref|XM_003001411.1| Verticillium albo-atrum VaMs.102 inositol oxygenase, mRNA	1e-161 gnl|CDD|191210 pfam05153, DUF706, Family of unknown function (DUF706). Family of uncharacterized eukaryotic function. Some members have a described putative function, but a common theme is not evident.	3e-80 sp|Q5Z8T3|MIOX_ORYSJ Probable inositol oxygenase OS=Oryza sativa subsp. japonica GN=Os06g0561000 PE=2 SV=1	0.0 tr|G2XDD5|G2XDD5_VERDV Inositol oxygenase OS=Verticillium dahliae (strain VdLs.17 / ATCC MYA-4575 / FGSC 10137) GN=VDAG_08167 PE=4 SV=1	GO:0005737,cytoplasm;GO:0050113,inositol oxygenase activity;GO:0019853,L-ascorbic acid biosynthetic process;GO:0006949,syncytium formation;GO:0019310,inositol catabolic process;GO:0005506,iron ion binding	K00469-ko00053,Ascorbate and aldarate metabolism;ko00562,Inositol phosphate metabolism
c17738_g1	174.01	2.01	33.32	-	-	1e-12 gnl|CDD|223149 COG0071, IbpA, Molecular chaperone (small heat shock protein) [Posttranslational modification, protein turnover, chaperones].	-	4e-70 gb|EGY22645.1| hypothetical protein VDAG_04083 [Verticillium dahliae VdLs.17]	3e-136 ref|XM_003004887.1| Verticillium albo-atrum VaMs.102 hypothetical protein, mRNA	-	-	4e-70 tr|G2X2N9|G2X2N9_VERDV Putative uncharacterized protein OS=Verticillium dahliae (strain VdLs.17 / ATCC MYA-4575 / FGSC 10137) GN=VDAG_04083 PE=4 SV=1	-	K13993-ko04141,Protein processing in endoplasmic reticulum
c17910_g1	8.12	0.29	1.98	-	-	-	-	-	-	-	-	-	-	-
c18027_g1	8.14	0.1	1.52	-	-	-	-	-	-	-	-	-	-	-
c1855_g1	49.87	4.91	15.92	-	-	2e-35 gnl|CDD|185741 cd09000, GH43_XYL_1, Glycosyl hydrolase family 43, beta-D-xylosidase. This glycosyl hydrolase family 43 (GH43) includes mostly enzymes that have been characterized to have beta-1,4-xylosidase (beta-D-xylosidase;xylan 1,4-beta-xylosidase; EC 3.2.1.37) activity. They are part of an array of hemicellulases that are involved in the final breakdown of plant cell-wall whereby they …	-	0.0 gb|EGY22422.1| hypothetical protein VDAG_03860 [Verticillium dahliae VdLs.17]	0.0 ref|XM_003006767.1| Verticillium albo-atrum VaMs.102 conserved hypothetical protein, mRNA	2e-19 gnl|CDD|218178 pfam04616, Glyco_hydro_43, Glycosyl hydrolases family 43. The glycosyl hydrolase family 43 contains members that are arabinanase. Rabinanases hydrolyses the alpha-1,5-linked L-arabinofuranoside backbone of plant cell wall arabinans. The structure of arabinanase Arb43A from Cellvibrio japonicus reveals a five-bladed beta-propeller fold. A long V-shaped groove, partially enclos…	5e-11 sp|P45982|XYLB_BUTFI Xylosidase/arabinosidase OS=Butyrivibrio fibrisolvens GN=xylB PE=3 SV=1	0.0 tr|G2X0T1|G2X0T1_VERDV Putative uncharacterized protein OS=Verticillium dahliae (strain VdLs.17 / ATCC MYA-4575 / FGSC 10137) GN=VDAG_03860 PE=4 SV=1	GO:0045493,xylan catabolic process;GO:0046556,alpha-N-arabinofuranosidase activity;GO:0009044,xylan 1,4-beta-xylosidase activity	-
c1896_g1	58.04	1.02	26.46	-	-	-	-	-	-	-	-	-	-	-
c1956_g1	7.61	26.06	3.36	-	-	2e-156 gnl|CDD|219384 pfam07350, DUF1479, Protein of unknown function (DUF1479). This family consists of several hypothetical Enterobacterial proteins, of around 420 residues in length. Members of this family are often known as YbiU. The function of this family is unknown.	-	0.0 gb|EGY14230.1| hypothetical protein VDAG_05394 [Verticillium dahliae VdLs.17]	0.0 ref|XM_002999755.1| Verticillium albo-atrum VaMs.102 conserved hypothetical protein, mRNA	4e-157 gnl|CDD|219384 pfam07350, DUF1479, Protein of unknown function (DUF1479). This family consists of several hypothetical Enterobacterial proteins, of around 420 residues in length. Members of this family are often known as YbiU. The function of this family is unknown.	6e-31 sp|P75791|YBIU_ECOLI Uncharacterized protein YbiU OS=Escherichia coli (strain K12) GN=ybiU PE=1 SV=1	0.0 tr|G2X589|G2X589_VERDV Putative uncharacterized protein OS=Verticillium dahliae (strain VdLs.17 / ATCC MYA-4575 / FGSC 10137) GN=VDAG_05394 PE=4 SV=1	-	-
c1968_g1	154.48	11.85	49.68	-	-	-	-	2e-22 gb|EGY14988.1| hypothetical protein VDAG_06478 [Verticillium dahliae VdLs.17]	0.0 ref|XM_003000979.1| Verticillium albo-atrum VaMs.102 hypothetical protein, mRNA	-	-	3e-22 tr|G2X7M0|G2X7M0_VERDV Putative uncharacterized protein OS=Verticillium dahliae (strain VdLs.17 / ATCC MYA-4575 / FGSC 10137) GN=VDAG_06478 PE=4 SV=1	-	-
c2021_g1	16.48	2.43	77.46	VDBG_10057	allantoin permease	0.0 gnl|CDD|212051 cd11482, SLC-NCS1sbd_NRT1-like, nucleobase-cation-symport-1 (NCS1) transporter NRT1-like; solute-binding domain. This fungal NCS1 subfamily includes various Saccharomyces cerevisiae transporters: nicotinamide riboside transporter 1 (Nrt1p, also called Thi71p), Dal4p (allantoin permease), Fui1p (uridine permease), Fur4p (uracil permease), and Thi7p (thiamine transporter). NCS1s …	1e-126 gnl|CDD|230405 KOG2466, KOG2466, KOG2466, Uridine permease/thiamine transporter/allantoin transport [Nucleotide transport and metabolism, Coenzyme transport and metabolism].	0.0 ref|XP_002999763.1| allantoin permease [Verticillium alfalfae VaMs.102] gb|EEY23947.1| allantoin permease [Verticillium alfalfae VaMs.102]	0.0 ref|XM_002999717.1| Verticillium albo-atrum VaMs.102 allantoin permease, mRNA	2e-89 gnl|CDD|216892 pfam02133, Transp_cyt_pur, Permease for cytosine/purines, uracil, thiamine, allantoin.	2e-87 sp|Q9P6J5|YHD5_SCHPO Uncharacterized permease C1683.05 OS=Schizosaccharomyces pombe (strain 972 / ATCC 24843) GN=SPBC1683.05 PE=3 SV=1	0.0 tr|C9SYT2|C9SYT2_VERA1 Allantoin permease OS=Verticillium albo-atrum (strain VaMs.102 / ATCC MYA-4576 / FGSC 10136) GN=VDBG_10057 PE=4 SV=1	GO:0016020,membrane;GO:0015205,nucleobase transmembrane transporter activity;GO:0015837,amine transport;GO:0000139,Golgi membrane;GO:0016021,integral to membrane;GO:0005886,plasma membrane;GO:0005794,Golgi apparatus;GO:0022857,transmembrane transporter activity	-
c2171_g1	22.57	0.83	6.85	VDBG_03157	TRI14	-	-	2e-167 ref|XP_003007018.1| TRI14 [Verticillium alfalfae VaMs.102] gb|EEY17048.1| TRI14 [Verticillium alfalfae VaMs.102]	0.0 ref|XM_003006972.1| Verticillium albo-atrum VaMs.102 TRI14, mRNA	-	-	2e-167 tr|C9SD83|C9SD83_VERA1 TRI14 OS=Verticillium albo-atrum (strain VaMs.102 / ATCC MYA-4576 / FGSC 10136) GN=VDBG_03157 PE=4 SV=1	-	-
c2432_g1	31.91	11.18	83.03	-	-	6e-26 gnl|CDD|224594 COG1680, AmpC, Beta-lactamase class C and other penicillin binding proteins [Defense mechanisms].	2e-13 gnl|CDD|229045 KOG1101, KOG1101, KOG1101, Apoptosis inhibitor IAP1 and related BIR domain proteins [Cell cycle control, cell division, chromosome partitioning, General function prediction only].	0.0 gb|EGY16777.1| hypothetical protein VDAG_07941 [Verticillium dahliae VdLs.17]	0.0 ref|XM_003009587.1| Verticillium albo-atrum VaMs.102 conserved hypothetical protein, mRNA	2e-24 gnl|CDD|215746 pfam00144, Beta-lactamase, Beta-lactamase. This family appears to be distantly related to pfam00905 and PF00768 D-alanyl-D-alanine carboxypeptidase.	5e-28 sp|O14064|BIR1_SCHPO Protein bir1 OS=Schizosaccharomyces pombe (strain 972 / ATCC 24843) GN=bir1 PE=1 SV=1	0.0 tr|G2XCQ9|G2XCQ9_VERDV Putative uncharacterized protein OS=Verticillium dahliae (strain VdLs.17 / ATCC MYA-4575 / FGSC 10137) GN=VDAG_07941 PE=4 SV=1	GO:0051233,spindle midzone;GO:0005737,cytoplasm;GO:0034503,protein localization to nucleolar rDNA repeats;GO:0030261,chromosome condensation;GO:0005622,intracellular;GO:0000910,cytokinesis;GO:0007094,mitotic spindle assembly checkpoint;GO:0032133,chromosome passenger complex;GO:0000070,mitotic sister chromatid segregation;GO:0034501,protein localization to kinetochore;GO:0000778,condensed nuclear…	-
c2516_g1	333.11	8.22	89.55	-	-	1e-46 gnl|CDD|187569 cd05259, PCBER_SDR_a, phenylcoumaran benzylic ether reductase (PCBER) like, atypical (a) SDRs. PCBER and pinoresinol-lariciresinol reductases are NADPH-dependent aromatic alcohol reductases, and are atypical members of the SDR family. Other proteins in this subgroup are identified as eugenol synthase. These proteins contain an N-terminus characteristic of NAD(P)-binding prote…	8e-19 gnl|CDD|230256 KOG2317, KOG2317, KOG2317, Putative translation initiation inhibitor UK114/IBM1 [Translation, ribosomal structure and biogenesis].	0.0 gb|EGY20047.1| L-amino-acid oxidase [Verticillium dahliae VdLs.17]	0.0 ref|XM_003006970.1| Verticillium albo-atrum VaMs.102 L-amino-acid oxidase, mRNA	3e-40 gnl|CDD|216593 pfam01593, Amino_oxidase, Flavin containing amine oxidoreductase. This family consists of various amine oxidases, including maze polyamine oxidase (PAO) and various flavin containing monoamine oxidases (MAO). The aligned region includes the flavin binding site of these enzymes. The family also contains phytoene dehydrogenases and related enzymes. In vertebrates MAO plays an i…	4e-159 sp|P23623|OXLA_NEUCR L-amino-acid oxidase OS=Neurospora crassa (strain ATCC 24698 / 74-OR23-1A / CBS 708.71 / DSM 1257 / FGSC 987) GN=lox PE=1 SV=2	0.0 tr|G2WUS2|G2WUS2_VERDV L-amino-acid oxidase OS=Verticillium dahliae (strain VdLs.17 / ATCC MYA-4575 / FGSC 10137) GN=VDAG_02063 PE=4 SV=1	GO:0001716,L-amino-acid oxidase activity;GO:0016491,oxidoreductase activity	-
c2648_g1	4.66	0.6	20.99	-	-	-	-	2e-165 gb|EGY14471.1| peptidase S15 [Verticillium dahliae VdLs.17]	-	-	2e-07 sp|Q01609|Y2218_PSEAE Uncharacterized protein PA2218 OS=Pseudomonas aeruginosa (strain ATCC 15692 / PAO1 / 1C / PRS 101 / LMG 12228) GN=PA2218 PE=1 SV=2	2e-165 tr|G2X653|G2X653_VERDV Peptidase S15 OS=Verticillium dahliae (strain VdLs.17 / ATCC MYA-4575 / FGSC 10137) GN=VDAG_05635 PE=4 SV=1	-	-
c270_g1	0.19	3.92	0.82	-	-	1e-57 gnl|CDD|199907 cd10320, RGL4_N, N-terminal catalytic domain of rhamnogalacturonan lyase, a family 4 polysaccharide lyase. The rhamnogalacturonan lyase of the polysaccharide lyase family 4 (RGL4) is involved in the degradation of RG (rhamnogalacturonan) type-I, an important pectic plant cell wall polysaccharide, by cleaving the alpha-1,4 glycoside bond between L-rhamnose and D-galacturonic a…	-	0.0 gb|EGY15955.1| rhamnogalacturonate lyase [Verticillium dahliae VdLs.17]	0.0 ref|XM_003004311.1| Verticillium albo-atrum VaMs.102 rhamnogalacturonate lyase, mRNA	-	0.0 sp|Q5B5P1|RGLC_EMENI Probable rhamnogalacturonate lyase C OS=Emericella nidulans (strain FGSC A4 / ATCC 38163 / CBS 112.46 / NRRL 194 / M139) GN=rglC PE=3 SV=1	0.0 tr|G2X9S4|G2X9S4_VERDV Rhamnogalacturonate lyase OS=Verticillium dahliae (strain VdLs.17 / ATCC MYA-4575 / FGSC 10137) GN=VDAG_07119 PE=4 SV=1	GO:0016829,lyase activity;GO:0005975,carbohydrate metabolic process;GO:0000272,polysaccharide catabolic process;GO:0005576,extracellular region;GO:0030246,carbohydrate binding	K18195
c2840_g1	18.97	3.73	8.82	-	-	1e-72 gnl|CDD|221185 pfam11719, Drc1-Sld2, DNA replication and checkpoint protein. Genome duplication is precisely regulated by cyclin-dependent kinases CDKs, which bring about the onset of S phase by activating replication origins and then prevent relicensing of origins until mitosis is completed. The optimum sequence motif for CDK phosphorylation is S/T-P-K/R-K/R, and Drc1-Sld2 is found to have…	4e-33 gnl|CDD|229341 KOG1399, KOG1399, KOG1399, Flavin-containing monooxygenase [Secondary metabolites biosynthesis, transport and catabolism].	0.0 gb|EGY17151.1| thiol-specific monooxygenase [Verticillium dahliae VdLs.17]	0.0 ref|XM_003005604.1| Verticillium albo-atrum VaMs.102 dimethylaniline monooxygenase, mRNA	2e-73 gnl|CDD|221185 pfam11719, Drc1-Sld2, DNA replication and checkpoint protein. Genome duplication is precisely regulated by cyclin-dependent kinases CDKs, which bring about the onset of S phase by activating replication origins and then prevent relicensing of origins until mitosis is completed. The optimum sequence motif for CDK phosphorylation is S/T-P-K/R-K/R, and Drc1-Sld2 is found to have…	3e-118 sp|Q4HW93|SLD2_GIBZE DNA replication regulator SLD2 OS=Gibberella zeae (strain PH-1 / ATCC MYA-4620 / FGSC 9075 / NRRL 31084) GN=SLD2 PE=3 SV=1	0.0 tr|G2WSQ2|G2WSQ2_VERDV Thiol-specific monooxygenase OS=Verticillium dahliae (strain VdLs.17 / ATCC MYA-4575 / FGSC 10137) GN=VDAG_00833 PE=4 SV=1	GO:0006260,DNA replication;GO:0050660,flavin adenine dinucleotide binding;GO:0005737,cytoplasm;GO:0004499,N,N-dimethylaniline monooxygenase activity;GO:0031227,intrinsic to endoplasmic reticulum membrane;GO:0005634,nucleus;GO:0050661,NADP binding;GO:0007049,cell cycle	-
c2854_g1	19.48	0.34	5.97	VDBG_07655	hypothetical protein	-	-	2e-70 ref|XP_003002196.1| conserved hypothetical protein [Verticillium alfalfae VaMs.102] gb|EEY21545.1| conserved hypothetical protein [Verticillium alfalfae VaMs.102]	4e-135 ref|XM_003002150.1| Verticillium albo-atrum VaMs.102 conserved hypothetical protein, mRNA	-	-	2e-70 tr|C9SRY0|C9SRY0_VERA1 Putative uncharacterized protein OS=Verticillium albo-atrum (strain VaMs.102 / ATCC MYA-4576 / FGSC 10136) GN=VDBG_07655 PE=4 SV=1	-	-
c3006_g1	22.3	3.31	8.78	-	-	-	-	1e-97 emb|CCE30814.1| uncharacterized protein CPUR_04663 [Claviceps purpurea 20.1]	-	-	-	2e-97 tr|M1WFB9|M1WFB9_CLAPU Uncharacterized protein OS=Claviceps purpurea 20.1 GN=CPUR_04663 PE=4 SV=1	-	-
c3123_g1	3.09	26.14	9.5	-	-	1e-155 gnl|CDD|199869 cd06248, M14_CP_A-B_like_1, Peptidase M14 carboxypeptidase subfamily A/B-like; uncharacterized subgroup. The Peptidase M14 Carboxypeptidase A/B-like subfamily is one of two main M14 carboxypeptidase subfamilies, defined by sequence and structural homology, the other being N/E. Carboxypeptidases (CPs) hydrolyze single, C-terminal amino acids from polypeptide chains. They have…	3e-100 gnl|CDD|230589 KOG2650, KOG2650, KOG2650, Zinc carboxypeptidase [Function unknown].	0.0 gb|EGY23677.1| zinc carboxypeptidase A [Verticillium dahliae VdLs.17]	0.0 ref|XM_003002967.1| Verticillium albo-atrum VaMs.102 zinc carboxypeptidase A, mRNA	1e-75 gnl|CDD|215816 pfam00246, Peptidase_M14, Zinc carboxypeptidase.	1e-99 sp|C5FH26|MCPAL_ARTOC Metallocarboxypeptidase A-like protein MCYG_01475 OS=Arthroderma otae (strain ATCC MYA-4605 / CBS 113480) GN=MCYG_01475 PE=3 SV=1	0.0 tr|G2X4N3|G2X4N3_VERDV Zinc carboxypeptidase A OS=Verticillium dahliae (strain VdLs.17 / ATCC MYA-4575 / FGSC 10137) GN=VDAG_05115 PE=4 SV=1	GO:0006508,proteolysis;GO:0009405,pathogenesis;GO:0008270,zinc ion binding;GO:0005576,extracellular region;GO:0004181,metallocarboxypeptidase activity;GO:0046872,metal ion binding	-
c3291_g1	3523.13	209.48	1653.18	-	-	0.0 gnl|CDD|240227 PTZ00009, PTZ00009, heat shock 70 kDa protein; Provisional.	0.0 gnl|CDD|228051 KOG0100, KOG0100, KOG0100, Molecular chaperones GRP78/BiP/KAR2, HSP70 superfamily [Posttranslational modification, protein turnover, chaperones].	0.0 gb|EGY15746.1| hsp70-like protein [Verticillium dahliae VdLs.17]	0.0 ref|XM_003004101.1| Verticillium albo-atrum VaMs.102 hsp70-like protein, mRNA	0.0 gnl|CDD|215656 pfam00012, HSP70, Hsp70 protein. Hsp70 chaperones help to fold many proteins. Hsp70 assisted folding involves repeated cycles of substrate binding and release. Hsp70 activity is ATP dependent. Hsp70 proteins are made up of two regions: the amino terminus is the ATPase domain and the carboxyl terminus is the substrate binding region.	0.0 sp|Q01233|HSP70_NEUCR Heat shock 70 kDa protein OS=Neurospora crassa (strain ATCC 24698 / 74-OR23-1A / CBS 708.71 / DSM 1257 / FGSC 987) GN=hsps-1 PE=2 SV=2	0.0 tr|G2XA07|G2XA07_VERDV Hsp70-like protein OS=Verticillium dahliae (strain VdLs.17 / ATCC MYA-4575 / FGSC 10137) GN=VDAG_06910 PE=3 SV=1	GO:0005524,ATP binding;GO:0006950,response to stress	K03283-ko03040,Spliceosome;ko04141,Protein processing in endoplasmic reticulum;ko04010,MAPK signaling pathway;ko04144,Endocytosis;ko04612,Antigen processing and presentation;ko04915,Estrogen signaling pathway;ko05134,Legionellosis;ko05162,Measles;ko05164,Influenza A;ko05169,Epstein-Barr virus infection;ko05145,Toxoplasmosis
c3336_g1	12.83	2.23	5.43	-	-	-	-	0.0 gb|EGY15979.1| hypothetical protein VDAG_07143 [Verticillium dahliae VdLs.17]	0.0 ref|XM_003004334.1| Verticillium albo-atrum VaMs.102 conserved hypothetical protein, mRNA	-	-	0.0 tr|G2X9U8|G2X9U8_VERDV Putative uncharacterized protein OS=Verticillium dahliae (strain VdLs.17 / ATCC MYA-4575 / FGSC 10137) GN=VDAG_07143 PE=4 SV=1	-	-
c3367_g1	7.17	0.37	2.37	-	-	-	-	-	-	-	-	-	-	-
c3522_g1	28.62	0.05	8.39	HCAG_06773	hypothetical protein	3e-19 gnl|CDD|221619 pfam12520, DUF3723, Protein of unknown function (DUF3723). This family of proteins is found in eukaryotes. Proteins in this family are typically between 374 and 1069 amino acids in length. There is a conserved LGF sequence motif.	-	8e-75 ref|XP_001539168.1| predicted protein [Ajellomyces capsulatus NAm1] gb|EDN09606.1| predicted protein [Ajellomyces capsulatus NAm1]	-	7e-20 gnl|CDD|221619 pfam12520, DUF3723, Protein of unknown function (DUF3723). This family of proteins is found in eukaryotes. Proteins in this family are typically between 374 and 1069 amino acids in length. There is a conserved LGF sequence motif.	-	9e-75 tr|A6R8Y2|A6R8Y2_AJECN Predicted protein OS=Ajellomyces capsulata (strain NAm1 / WU24) GN=HCAG_06773 PE=4 SV=1	GO:0003964,RNA-directed DNA polymerase activity;GO:0003723,RNA binding;GO:0004523,ribonuclease H activity;GO:0008270,zinc ion binding;GO:0006278,RNA-dependent DNA replication	-
c3631_g1	2.15	0.21	6.8	-	-	5e-103 gnl|CDD|176211 cd08249, enoyl_reductase_like, enoyl_reductase_like. Member identified as possible enoyl reductase of the MDR family. 2-enoyl thioester reductase (ETR) catalyzes the NADPH-dependent dependent conversion of trans-2-enoyl acyl carrier protein/coenzyme A (ACP/CoA) to acyl-(ACP/CoA) in fatty acid synthesis. 2-enoyl thioester reductase activity has been linked in Candida tropical…	7e-17 gnl|CDD|229140 KOG1198, KOG1198, KOG1198, Zinc-binding oxidoreductase [Energy production and conversion, General function prediction only].	2e-122 emb|CCT72378.1| related to C.carbonum toxD protein [Fusarium fujikuroi IMI 58289]	-	6e-11 gnl|CDD|219758 pfam08240, ADH_N, Alcohol dehydrogenase GroES-like domain. This is the catalytic domain of alcohol dehydrogenases. Many of them contain an inserted zinc binding domain. This domain has a GroES-like structure.	3e-27 sp|P54006|TOXD_COCCA Protein TOXD OS=Cochliobolus carbonum GN=TOXD PE=3 SV=1	1e-111 tr|R0KE38|R0KE38_SETTU Uncharacterized protein OS=Setosphaeria turcica Et28A GN=SETTUDRAFT_110023 PE=4 SV=1	GO:0000166,nucleotide binding;GO:0008270,zinc ion binding;GO:0016491,oxidoreductase activity	K15385
c3694_g1	62.16	11.89	27.23	-	-	2e-66 gnl|CDD|223678 COG0605, SodA, Superoxide dismutase [Inorganic ion transport and metabolism].	5e-53 gnl|CDD|228822 KOG0876, KOG0876, KOG0876, Manganese superoxide dismutase [Inorganic ion transport and metabolism].	0.0 gb|EGY19505.1| anucleate primary sterigmata protein B [Verticillium dahliae VdLs.17]	0.0 ref|XM_003005547.1| Verticillium albo-atrum VaMs.102 anucleate primary sterigmata protein B, mRNA	9e-35 gnl|CDD|220197 pfam09351, DUF1993, Domain of unknown function (DUF1993). This family of proteins are functionally uncharacterized.	0.0 sp|O60039|APSB_EMENI Anucleate primary sterigmata protein B OS=Emericella nidulans (strain FGSC A4 / ATCC 38163 / CBS 112.46 / NRRL 194 / M139) GN=apsB PE=4 SV=2	0.0 tr|G2XI57|G2XI57_VERDV Anucleate primary sterigmata protein B OS=Verticillium dahliae (strain VdLs.17 / ATCC MYA-4575 / FGSC 10137) GN=VDAG_09839 PE=4 SV=1	GO:0005737,cytoplasm	-
c3780_g1	11.26	1.09	5.32	VDBG_08529	hypothetical protein	-	-	0.0 ref|XP_003001484.1| predicted protein [Verticillium alfalfae VaMs.102] gb|EEY22419.1| predicted protein [Verticillium alfalfae VaMs.102]	0.0 ref|XM_003001438.1| Verticillium albo-atrum VaMs.102 predicted protein, mRNA	-	-	0.0 tr|C9SUA8|C9SUA8_VERA1 Predicted protein OS=Verticillium albo-atrum (strain VaMs.102 / ATCC MYA-4576 / FGSC 10136) GN=VDBG_08529 PE=4 SV=1	-	-
c380_g1	11.9	0.72	4.35	-	-	-	-	6e-86 gb|EGY16136.1| ATP-binding cassette sub-family A member 9 [Verticillium dahliae VdLs.17]	0.0 ref|XM_003000608.1| Verticillium albo-atrum VaMs.102 ATP-binding cassette sub-family A member 9, mRNA	-	-	7e-86 tr|G2XAM0|G2XAM0_VERDV ATP-binding cassette sub-family A member 9 OS=Verticillium dahliae (strain VdLs.17 / ATCC MYA-4575 / FGSC 10137) GN=VDAG_07300 PE=3 SV=1	GO:0016887,ATPase activity;GO:0005524,ATP binding;GO:0006200,ATP catabolic process	-
c3830_g1	15.18	0.45	5.01	-	-	-	-	1e-172 gb|EGY16259.1| hypothetical protein VDAG_07423 [Verticillium dahliae VdLs.17]	2e-68 ref|XM_003000724.1| Verticillium albo-atrum VaMs.102 predicted protein, mRNA	-	-	2e-172 tr|G2XAU2|G2XAU2_VERDV Putative uncharacterized protein OS=Verticillium dahliae (strain VdLs.17 / ATCC MYA-4575 / FGSC 10137) GN=VDAG_07423 PE=4 SV=1	GO:0008080,N-acetyltransferase activity	-
c3875_g1	27.97	2.44	8.2	-	-	-	-	-	-	-	-	-	-	-
c3885_g1	4.98	0.37	1.81	-	-	-	-	-	-	-	-	-	-	-
c3904_g1	25.6	4.98	12.36	-	-	-	-	3e-82 gb|EGY15194.1| hypothetical protein VDAG_06048 [Verticillium dahliae VdLs.17]	0.0 ref|XM_003002726.1| Verticillium albo-atrum VaMs.102 conserved hypothetical protein, mRNA	-	-	4e-82 tr|G2X8A7|G2X8A7_VERDV Putative uncharacterized protein OS=Verticillium dahliae (strain VdLs.17 / ATCC MYA-4575 / FGSC 10137) GN=VDAG_06048 PE=4 SV=1	-	-
c4053_g1	10.1	0.62	3.88	-	-	9e-09 gnl|CDD|215768 pfam00174, Oxidored_molyb, Oxidoreductase molybdopterin binding domain. This domain is found in a variety of oxidoreductases. This domain binds to a molybdopterin cofactor. Xanthine dehydrogenases, that also bind molybdopterin, have essentially no similarity.	-	2e-41 gb|EGY21309.1| hypothetical protein VDAG_02833 [Verticillium dahliae VdLs.17]	-	2e-09 gnl|CDD|215768 pfam00174, Oxidored_molyb, Oxidoreductase molybdopterin binding domain. This domain is found in a variety of oxidoreductases. This domain binds to a molybdopterin cofactor. Xanthine dehydrogenases, that also bind molybdopterin, have essentially no similarity.	-	3e-41 tr|G2WX54|G2WX54_VERDV Putative uncharacterized protein OS=Verticillium dahliae (strain VdLs.17 / ATCC MYA-4575 / FGSC 10137) GN=VDAG_02833 PE=4 SV=1	-	-
c4184_g1	67.03	0	6.4	-	-	-	-	4e-14 gb|ABM53544.1| conserved hypothetical protein [uncultured beta proteobacterium CBNPD1 BAC clone 578]	3e-150 ref|NR_076879.1| Pseudomonas fulva 12-X strain 12-X 23S ribosomal RNA, complete sequence	-	-	5e-14 tr|B1N6J8|B1N6J8_9PROT Putative uncharacterized protein OS=uncultured beta proteobacterium CBNPD1 BAC clone 578 PE=4 SV=1	-	-
c4200_g1	76.7	7.79	17.21	-	-	-	-	5e-08 gb|EGY19726.1| hypothetical protein VDAG_01742 [Verticillium dahliae VdLs.17]	-	-	-	5e-08 tr|G2WVV6|G2WVV6_VERDV Putative uncharacterized protein OS=Verticillium dahliae (strain VdLs.17 / ATCC MYA-4575 / FGSC 10137) GN=VDAG_01742 PE=4 SV=1	-	-
c422_g1	102.06	6.54	19.86	-	-	-	-	-	-	-	-	-	-	-
c4237_g1	157.65	47.22	1066.95	-	-	-	-	1e-154 gb|EGY16775.1| hypothetical protein VDAG_07939 [Verticillium dahliae VdLs.17]	0.0 ref|XM_003009589.1| Verticillium albo-atrum VaMs.102 conserved hypothetical protein, mRNA	-	-	1e-154 tr|G2XCQ7|G2XCQ7_VERDV Putative uncharacterized protein OS=Verticillium dahliae (strain VdLs.17 / ATCC MYA-4575 / FGSC 10137) GN=VDAG_07939 PE=4 SV=1	-	-
c4256_g1	6.86	17.51	2.4	-	-	-	-	0.0 gb|EGY19527.1| hypothetical protein VDAG_09861 [Verticillium dahliae VdLs.17]	0.0 ref|XM_003005525.1| Verticillium albo-atrum VaMs.102 predicted protein, mRNA	-	-	0.0 tr|G2XI79|G2XI79_VERDV Putative uncharacterized protein OS=Verticillium dahliae (strain VdLs.17 / ATCC MYA-4575 / FGSC 10137) GN=VDAG_09861 PE=4 SV=1	-	-
c4303_g1	3.38	1.65	10.06	-	-	1e-54 gnl|CDD|224983 COG2072, TrkA, Predicted flavoprotein involved in K+ transport [Inorganic ion transport and metabolism].	9e-11 gnl|CDD|229341 KOG1399, KOG1399, KOG1399, Flavin-containing monooxygenase [Secondary metabolites biosynthesis, transport and catabolism].	0.0 gb|EGY16699.1| 4-hydroxyacetophenone monooxygenase [Verticillium dahliae VdLs.17]	0.0 ref|XM_003009658.1| Verticillium albo-atrum VaMs.102 4-hydroxyacetophenone monooxygenase, mRNA	2e-09 gnl|CDD|222355 pfam13738, Pyr_redox_3, Pyridine nucleotide-disulphide oxidoreductase.	1e-64 sp|Q00730|STCW_EMENI Putative sterigmatocystin biosynthesis monooxygenase stcW OS=Emericella nidulans (strain FGSC A4 / ATCC 38163 / CBS 112.46 / NRRL 194 / M139) GN=stcW PE=3 SV=2	0.0 tr|G2XCI1|G2XCI1_VERDV 4-hydroxyacetophenone monooxygenase OS=Verticillium dahliae (strain VdLs.17 / ATCC MYA-4575 / FGSC 10137) GN=VDAG_07863 PE=4 SV=1	GO:0045461,sterigmatocystin biosynthetic process;GO:0004497,monooxygenase activity	-
c4340_g2	112.65	55.76	254.68	-	-	-	-	1e-14 gb|EQB51574.1| hypothetical protein CGLO_08867 [Colletotrichum gloeosporioides Cg-14]	-	-	-	7e-13 tr|H1W4D3|H1W4D3_COLHI Uncharacterized protein OS=Colletotrichum higginsianum (strain IMI 349063) GN=CH063_15768 PE=4 SV=1	-	-
c4373_g2	4.79	27.51	12.14	-	-	2e-86 gnl|CDD|200575 cd10951, CE4_ClCDA_like, Catalytic NodB homology domain of Colletotrichum lindemuthianum chitin deacetylase and similar proteins. This family is represented by the chitin deacetylase (endo-chitin de-N-acetylase, ClCDA, EC 3.5.1.41) from Colletotrichum lindemuthianum (also known as Glomerella lindemuthiana), which is a member of the carbohydrate esterase 4 (CE4) superfamily. C…	-	0.0 gb|EGY16563.1| polysaccharide deacetylase family protein [Verticillium dahliae VdLs.17]	0.0 ref|XM_003004634.1| Verticillium albo-atrum VaMs.102 polysaccharide deacetylase family protein, mRNA	5e-38 gnl|CDD|216550 pfam01522, Polysacc_deac_1, Polysaccharide deacetylase. This domain is found in polysaccharide deacetylase. This family of polysaccharide deacetylases includes NodB (nodulation protein B from Rhizobium) which is a chitooligosaccharide deacetylase. It also includes chitin deacetylase from yeast, and endoxylanases which hydrolyses glucosidic bonds in xylan.	2e-18 sp|P50325|CDA_AMYRO Chitin deacetylase OS=Amylomyces rouxii PE=1 SV=1	0.0 tr|G2XC45|G2XC45_VERDV Polysaccharide deacetylase family protein OS=Verticillium dahliae (strain VdLs.17 / ATCC MYA-4575 / FGSC 10137) GN=VDAG_07727 PE=4 SV=1	GO:0006032,chitin catabolic process;GO:0004099,chitin deacetylase activity;GO:0008061,chitin binding;GO:0005975,carbohydrate metabolic process;GO:0000272,polysaccharide catabolic process;GO:0016810,hydrolase activity, acting on carbon-nitrogen (but not peptide) bonds	-
c4374_g1	21.41	0.14	7.08	VDBG_10110	hypothetical protein	-	-	1e-161 ref|XP_002999651.1| predicted protein [Verticillium alfalfae VaMs.102] gb|EEY24000.1| predicted protein [Verticillium alfalfae VaMs.102]	0.0 ref|XM_002999605.1| Verticillium albo-atrum VaMs.102 predicted protein, mRNA	-	-	1e-161 tr|C9SYY5|C9SYY5_VERA1 Predicted protein OS=Verticillium albo-atrum (strain VaMs.102 / ATCC MYA-4576 / FGSC 10136) GN=VDBG_10110 PE=4 SV=1	-	-
c4379_g1	13.4	0.49	2.53	-	-	-	-	-	-	-	-	-	-	-
c4611_g2	9.45	2.98	19.07	-	-	-	-	3e-88 gb|EGY19773.1| hypothetical protein VDAG_01789 [Verticillium dahliae VdLs.17]	-	-	-	3e-88 tr|G2WW03|G2WW03_VERDV Putative uncharacterized protein OS=Verticillium dahliae (strain VdLs.17 / ATCC MYA-4575 / FGSC 10137) GN=VDAG_01789 PE=4 SV=1	-	-
c4992_g2	24.44	1.53	11.73	-	-	-	-	-	-	-	-	-	-	-
c5088_g1	2.51	1.16	6.1	-	-	2e-28 gnl|CDD|220036 pfam08837, DUF1810, Protein of unknown function (DUF1810). This is a family of uncharacterized proteins. The structure of one of the members in this family has been solved and it adopts a mainly alpha helical structure.	-	0.0 gb|EGY16172.1| L-amino-acid oxidase [Verticillium dahliae VdLs.17]	0.0 ref|XM_003000642.1| Verticillium albo-atrum VaMs.102 L-amino-acid oxidase, mRNA	4e-29 gnl|CDD|220036 pfam08837, DUF1810, Protein of unknown function (DUF1810). This is a family of uncharacterized proteins. The structure of one of the members in this family has been solved and it adopts a mainly alpha helical structure.	1e-54 sp|P23623|OXLA_NEUCR L-amino-acid oxidase OS=Neurospora crassa (strain ATCC 24698 / 74-OR23-1A / CBS 708.71 / DSM 1257 / FGSC 987) GN=lox PE=1 SV=2	0.0 tr|G2XAV7|G2XAV7_VERDV L-amino-acid oxidase OS=Verticillium dahliae (strain VdLs.17 / ATCC MYA-4575 / FGSC 10137) GN=VDAG_07336 PE=4 SV=1	GO:0001716,L-amino-acid oxidase activity;GO:0016491,oxidoreductase activity	-
c5096_g1	3.69	9.03	1.36	-	-	0.0 gnl|CDD|216347 pfam01179, Cu_amine_oxid, Copper amine oxidase, enzyme domain. Copper amine oxidases are a ubiquitous and novel group of quinoenzymes that catalyze the oxidative deamination of primary amines to the corresponding aldehydes, with concomitant reduction of molecular oxygen to hydrogen peroxide. The enzymes are dimers of identical 70-90 kDa subunits, each of which contains a single…	6e-121 gnl|CDD|229128 KOG1186, KOG1186, KOG1186, Copper amine oxidase [Secondary metabolites biosynthesis, transport and catabolism].	0.0 gb|EGY16150.1| copper amine oxidase [Verticillium dahliae VdLs.17]	0.0 ref|XM_003000623.1| Verticillium albo-atrum VaMs.102 copper amine oxidase, mRNA	0.0 gnl|CDD|216347 pfam01179, Cu_amine_oxid, Copper amine oxidase, enzyme domain. Copper amine oxidases are a ubiquitous and novel group of quinoenzymes that catalyze the oxidative deamination of primary amines to the corresponding aldehydes, with concomitant reduction of molecular oxygen to hydrogen peroxide. The enzymes are dimers of identical 70-90 kDa subunits, each of which contains a single…	0.0 sp|Q12556|AMO1_ASPNG Copper amine oxidase 1 OS=Aspergillus niger GN=AO-I PE=1 SV=2	0.0 tr|G2XAN4|G2XAN4_VERDV Amine oxidase OS=Verticillium dahliae (strain VdLs.17 / ATCC MYA-4575 / FGSC 10137) GN=VDAG_07314 PE=3 SV=1	GO:0005507,copper ion binding;GO:0052599,methylputrescine oxidase activity;GO:0052598,histamine oxidase activity;GO:0008131,primary amine oxidase activity;GO:0048038,quinone binding;GO:0009308,amine metabolic process;GO:0052600,propane-1,3-diamine oxidase activity;GO:0052597,diamine oxidase activity	K00276-ko00260,Glycine, serine and threonine metabolism;ko00350,Tyrosine metabolism;ko00360,Phenylalanine metabolism;ko00410,beta-Alanine metabolism;ko00950,Isoquinoline alkaloid biosynthesis;ko00960,Tropane, piperidine and pyridine alkaloid biosynthesis
c515_g1	14.06	0	2.74	-	-	-	-	-	-	-	-	-	-	-
c539_g1	0.37	1.62	5.92	VDBG_06591	inorganic pyrophosphatase	3e-58 gnl|CDD|178309 PLN02707, PLN02707, Soluble inorganic pyrophosphatase.	7e-77 gnl|CDD|229567 KOG1626, KOG1626, KOG1626, Inorganic pyrophosphatase/Nucleosome remodeling factor, subunit NURF38 [Energy production and conversion].	0.0 ref|XP_003003029.1| inorganic pyrophosphatase [Verticillium alfalfae VaMs.102] gb|EEY20481.1| inorganic pyrophosphatase [Verticillium alfalfae VaMs.102]	0.0 ref|XM_003002983.1| Verticillium albo-atrum VaMs.102 inorganic pyrophosphatase, mRNA	3e-40 gnl|CDD|189686 pfam00719, Pyrophosphatase, Inorganic pyrophosphatase.	2e-72 sp|P00817|IPYR_YEAST Inorganic pyrophosphatase OS=Saccharomyces cerevisiae (strain ATCC 204508 / S288c) GN=IPP1 PE=1 SV=4	0.0 tr|C9SNW6|C9SNW6_VERA1 Inorganic pyrophosphatase OS=Verticillium albo-atrum (strain VaMs.102 / ATCC MYA-4576 / FGSC 10136) GN=VDBG_06591 PE=4 SV=1	GO:0005737,cytoplasm;GO:0006796,phosphate-containing compound metabolic process;GO:0000287,magnesium ion binding;GO:0004427,inorganic diphosphatase activity;GO:0005829,cytosol;GO:0042803,protein homodimerization activity	K01507-ko00190,Oxidative phosphorylation
c5398_g1	0.16	1.2	7.13	-	-	-	-	0.0 gb|EGY22056.1| integral membrane protein [Verticillium dahliae VdLs.17]	0.0 ref|XM_003003857.1| Verticillium albo-atrum VaMs.102 conserved hypothetical protein, mRNA	-	-	0.0 tr|G2WZQ4|G2WZQ4_VERDV Integral membrane protein OS=Verticillium dahliae (strain VdLs.17 / ATCC MYA-4575 / FGSC 10137) GN=VDAG_03496 PE=4 SV=1	-	-
c5491_g1	56.72	20.29	291.76	-	-	5e-101 gnl|CDD|238191 cd00312, Esterase_lipase, Esterases and lipases (includes fungal lipases, cholinesterases, etc.) These enzymes act on carboxylic esters (EC: 3.1.1.-). The catalytic apparatus involves three residues (catalytic triad): a serine, a glutamate or aspartate and a histidine.These catalytic residues are responsible for the nucleophilic attack on the carbonyl carbon atom of the este…	2e-57 gnl|CDD|232318 KOG4389, KOG4389, KOG4389, Acetylcholinesterase/Butyrylcholinesterase [Signal transduction mechanisms].	0.0 gb|EGY14246.1| lipase [Verticillium dahliae VdLs.17]	0.0 ref|XM_003001541.1| Verticillium albo-atrum VaMs.102 cobalamin synthesis protein, mRNA	2e-96 gnl|CDD|215741 pfam00135, COesterase, Carboxylesterase family.	1e-129 sp|P32946|LIP2_CANRU Lipase 2 OS=Candida rugosa GN=LIP2 PE=1 SV=1	0.0 tr|G2X5A5|G2X5A5_VERDV Lipase OS=Verticillium dahliae (strain VdLs.17 / ATCC MYA-4575 / FGSC 10137) GN=VDAG_05410 PE=4 SV=1	GO:0016787,hydrolase activity;GO:0004806,triglyceride lipase activity;GO:0050253,retinyl-palmitate esterase activity;GO:0016042,lipid catabolic process	-
c5528_g1	21.99	9.41	132.29	-	-	9e-66 gnl|CDD|223729 COG0656, ARA1, Aldo/keto reductases, related to diketogulonate reductase [General function prediction only].	7e-72 gnl|CDD|229518 KOG1577, KOG1577, KOG1577, Aldo/keto reductase family proteins [General function prediction only].	1e-176 gb|EGY22245.1| GCY protein [Verticillium dahliae VdLs.17]	0.0 ref|XM_003006579.1| Verticillium albo-atrum VaMs.102 GCY, mRNA	6e-36 gnl|CDD|215817 pfam00248, Aldo_ket_red, Aldo/keto reductase family. This family includes a number of K+ ion channel beta chain regulatory domains - these are reported to have oxidoreductase activity.	4e-92 sp|P27800|ALDX_SPOSA Aldehyde reductase 1 OS=Sporobolomyces salmonicolor GN=ARI PE=1 SV=3	2e-176 tr|G2X0A4|G2X0A4_VERDV GCY protein OS=Verticillium dahliae (strain VdLs.17 / ATCC MYA-4575 / FGSC 10137) GN=VDAG_03683 PE=4 SV=1	GO:0005623,cell;GO:0008106,alcohol dehydrogenase (NADP+) activity;GO:0016491,oxidoreductase activity	K18107-ko00040,Pentose and glucuronate interconversions
c5686_g1	128.9	0	16.13	-	-	-	-	7e-18 ref|WP_001896259.1| hypothetical protein [Vibrio cholerae] gb|EAX56522.1| conserved hypothetical protein [Vibrio cholerae 2740-80]	5e-148 gb|KC452672.1| Uncultured gamma proteobacterium clone RLBp5750 16S ribosomal RNA gene, partial sequence	-	-	9e-18 tr|A1FB49|A1FB49_VIBCL Putative uncharacterized protein OS=Vibrio cholerae 2740-80 GN=VC274080_B0002 PE=4 SV=1	-	-
c5701_g1	99.03	4.67	30.77	-	-	-	-	0.0 gb|EGY16043.1| hypothetical protein VDAG_07207 [Verticillium dahliae VdLs.17]	0.0 ref|XM_003000515.1| Verticillium albo-atrum VaMs.102 integral membrane protein, mRNA	-	-	0.0 tr|G2XB69|G2XB69_VERDV Putative uncharacterized protein OS=Verticillium dahliae (strain VdLs.17 / ATCC MYA-4575 / FGSC 10137) GN=VDAG_07207 PE=4 SV=1	-	-
c5762_g1	239.07	13.41	74.5	VDBG_09332	ECM14	0.0 gnl|CDD|129782 TIGR00699, GABAtrns_euk, 4-aminobutyrate aminotransferase, eukaryotic type. This enzyme is a class III pyridoxal-phosphate-dependent aminotransferase. This model describes known eukaryotic examples of the enzyme. The degree of sequence difference between this set and known bacterial examples is greater than the distance between either set the most similar enzyme with distinct f…	0.0 gnl|CDD|229347 KOG1405, KOG1405, KOG1405, 4-aminobutyrate aminotransferase [Amino acid transport and metabolism].	0.0 ref|XP_003000137.1| ECM14 [Verticillium alfalfae VaMs.102] gb|EEY23222.1| ECM14 [Verticillium alfalfae VaMs.102]	0.0 ref|XM_003000091.1| Verticillium albo-atrum VaMs.102 ECM14, mRNA	1e-91 gnl|CDD|201078 pfam00202, Aminotran_3, Aminotransferase class-III.	0.0 sp|P14010|GABAT_EMENI 4-aminobutyrate aminotransferase OS=Emericella nidulans (strain FGSC A4 / ATCC 38163 / CBS 112.46 / NRRL 194 / M139) GN=gatA PE=3 SV=1	0.0 tr|C9SX32|C9SX32_VERA1 ECM14 OS=Verticillium albo-atrum (strain VaMs.102 / ATCC MYA-4576 / FGSC 10136) GN=VDBG_09332 PE=4 SV=1	GO:0005737,cytoplasm;GO:0030170,pyridoxal phosphate binding;GO:0006508,proteolysis;GO:0009450,gamma-aminobutyric acid catabolic process;GO:0003867,4-aminobutyrate transaminase activity;GO:0008270,zinc ion binding;GO:0004181,metallocarboxypeptidase activity	K13524-ko00640,Propanoate metabolism;ko00650,Butanoate metabolism;ko00250,Alanine, aspartate and glutamate metabolism;ko00280,Valine, leucine and isoleucine degradation;ko00410,beta-Alanine metabolism;ko04727,GABAergic synapse
c5764_g1	1.02	3.64	8.83	-	-	9e-14 gnl|CDD|224753 COG1840, AfuA, ABC-type Fe3+ transport system, periplasmic component [Inorganic ion transport and metabolism].	-	0.0 gb|EGY14504.1| ABC transporter [Verticillium dahliae VdLs.17]	0.0 ref|XM_003003007.1| Verticillium albo-atrum VaMs.102 ABC transporter, mRNA	4e-06 gnl|CDD|222203 pfam13531, SBP_bac_11, Bacterial extracellular solute-binding protein. This family includes bacterial extracellular solute-binding proteins.	-	0.0 tr|G2X686|G2X686_VERDV ABC transporter OS=Verticillium dahliae (strain VdLs.17 / ATCC MYA-4575 / FGSC 10137) GN=VDAG_05668 PE=4 SV=1	-	-
c5784_g1	19.51	0.12	4.67	-	-	-	-	0.0 gb|EGY15168.1| hypothetical protein VDAG_06022 [Verticillium dahliae VdLs.17]	0.0 ref|XM_003002698.1| Verticillium albo-atrum VaMs.102 conserved hypothetical protein, mRNA	-	-	0.0 tr|G2X881|G2X881_VERDV Putative uncharacterized protein OS=Verticillium dahliae (strain VdLs.17 / ATCC MYA-4575 / FGSC 10137) GN=VDAG_06022 PE=4 SV=1	GO:0044237,cellular metabolic process;GO:0003824,catalytic activity;GO:0000166,nucleotide binding;GO:0050662,coenzyme binding	-
c580_g1	7.61	2.67	21.33	-	-	-	-	2e-46 gb|EGY22470.1| peroxide stress-activated histidine kinase mak1 [Verticillium dahliae VdLs.17]	3e-130 ref|XM_003006811.1| Verticillium albo-atrum VaMs.102 peroxide stress-activated histidine kinase mak1, mRNA	-	-	2e-46 tr|G2X0X9|G2X0X9_VERDV Peroxide stress-activated histidine kinase mak1 OS=Verticillium dahliae (strain VdLs.17 / ATCC MYA-4575 / FGSC 10137) GN=VDAG_03908 PE=4 SV=1	GO:0016020,membrane;GO:0005622,intracellular;GO:0000155,phosphorelay sensor kinase activity;GO:0023014,signal transduction by phosphorylation;GO:0005524,ATP binding;GO:0006355,regulation of transcription, DNA-dependent;GO:0035556,intracellular signal transduction;GO:0000156,phosphorelay response regulator activity	-
c5922_g1	2.11	4.92	11.01	-	-	2e-63 gnl|CDD|216875 pfam02102, Peptidase_M35, Deuterolysin metalloprotease (M35) family.	-	0.0 gb|EGY16866.1| metalloproteinase [Verticillium dahliae VdLs.17]	0.0 ref|XM_003009503.1| Verticillium albo-atrum VaMs.102 metalloproteinase, mRNA	5e-64 gnl|CDD|216875 pfam02102, Peptidase_M35, Deuterolysin metalloprotease (M35) family.	1e-131 sp|E3QWD3|NPIIA_COLGM Neutral protease 2 homolog MGG_10927 OS=Colletotrichum graminicola (strain M1.001 / M2 / FGSC 10212) GN=GLRG_10315 PE=3 SV=1	0.0 tr|G2XCZ8|G2XCZ8_VERDV Metalloproteinase OS=Verticillium dahliae (strain VdLs.17 / ATCC MYA-4575 / FGSC 10137) GN=VDAG_08030 PE=3 SV=1	GO:0006508,proteolysis;GO:0004222,metalloendopeptidase activity;GO:0005576,extracellular region;GO:0046872,metal ion binding	K19305
c5961_g1	5.94	44.14	15.42	-	-	1e-107 gnl|CDD|239238 cd02922, FCB2_FMN, Flavocytochrome b2 (FCB2) FMN-binding domain. FCB2 (AKA L-lactate:cytochrome c oxidoreductase) is a respiratory enzyme located in the intermembrane space of fungal mitochondria which catalyzes the oxidation of L-lactate to pyruvate. FCB2 also participates in a short electron-transport chain involving cytochrome c and cytochrome oxidase which ultimately dir…	3e-63 gnl|CDD|228486 KOG0538, KOG0538, KOG0538, Glycolate oxidase [Energy production and conversion].	0.0 gb|EGY15950.1| cytochrome b2 [Verticillium dahliae VdLs.17]	0.0 ref|XM_003004306.1| Verticillium albo-atrum VaMs.102 cytochrome b2, mRNA	8e-72 gnl|CDD|216281 pfam01070, FMN_dh, FMN-dependent dehydrogenase.	6e-44 sp|P00175|CYB2_YEAST Cytochrome b2, mitochondrial OS=Saccharomyces cerevisiae (strain ATCC 204508 / S288c) GN=CYB2 PE=1 SV=1	0.0 tr|G2X9R9|G2X9R9_VERDV Cytochrome b2 OS=Verticillium dahliae (strain VdLs.17 / ATCC MYA-4575 / FGSC 10137) GN=VDAG_07114 PE=4 SV=1	GO:0020037,heme binding;GO:0010181,FMN binding;GO:0005743,mitochondrial inner membrane;GO:0006089,lactate metabolic process;GO:0005829,cytosol;GO:0016491,oxidoreductase activity;GO:0005758,mitochondrial intermembrane space;GO:0022900,electron transport chain;GO:0046872,metal ion binding;GO:0004460,L-lactate dehydrogenase (cytochrome) activity;GO:0070469,respiratory chain	-
c5962_g1	25.87	3.46	88.23	VDBG_10180	hypothetical protein	-	-	2e-59 ref|XP_002999631.1| predicted protein [Verticillium alfalfae VaMs.102] gb|EEY24070.1| predicted protein [Verticillium alfalfae VaMs.102] gb|EGY23802.1| hypothetical protein VDAG_05240 [Verticillium dahliae VdLs.17]	9e-145 ref|XM_002999585.1| Verticillium albo-atrum VaMs.102 predicted protein, mRNA	-	-	2e-59 tr|G2X508|G2X508_VERDV Putative uncharacterized protein OS=Verticillium dahliae (strain VdLs.17 / ATCC MYA-4575 / FGSC 10137) GN=VDAG_05240 PE=4 SV=1	-	-
c5977_g1	12.68	2.36	4.53	-	-	-	-	-	-	-	-	-	-	-
c5997_g2	11	0.81	3.1	VDBG_05334	hypothetical protein	-	-	1e-53 ref|XP_003004221.1| predicted protein [Verticillium alfalfae VaMs.102] gb|EEY19225.1| predicted protein [Verticillium alfalfae VaMs.102]	0.0 ref|XM_003004175.1| Verticillium albo-atrum VaMs.102 predicted protein, mRNA	-	-	1e-53 tr|C9SKK7|C9SKK7_VERA1 Predicted protein OS=Verticillium albo-atrum (strain VaMs.102 / ATCC MYA-4576 / FGSC 10136) GN=VDBG_05334 PE=4 SV=1	-	-
c6037_g1	14.95	0.83	4.65	-	-	-	-	-	-	-	-	-	-	-
c6050_g1	3.48	8.4	1.73	-	-	7e-16 gnl|CDD|217880 pfam04082, Fungal_trans, Fungal specific transcription factor domain.	-	0.0 gb|EGY22895.1| hypothetical protein VDAG_04333 [Verticillium dahliae VdLs.17]	0.0 ref|XM_003005141.1| Verticillium albo-atrum VaMs.102 conserved hypothetical protein, mRNA	1e-16 gnl|CDD|217880 pfam04082, Fungal_trans, Fungal specific transcription factor domain.	3e-07 sp|P38157|MAL33_YEAST Maltose fermentation regulatory protein MAL33 OS=Saccharomyces cerevisiae (strain ATCC 204508 / S288c) GN=MAL33 PE=3 SV=1	0.0 tr|G2X209|G2X209_VERDV Putative uncharacterized protein OS=Verticillium dahliae (strain VdLs.17 / ATCC MYA-4575 / FGSC 10137) GN=VDAG_04333 PE=4 SV=1	GO:0000981,sequence-specific DNA binding RNA polymerase II transcription factor activity;GO:0000023,maltose metabolic process;GO:0003700,sequence-specific DNA binding transcription factor activity;GO:0044262,cellular carbohydrate metabolic process;GO:0003677,DNA binding;GO:0006357,regulation of transcription from RNA polymerase II promoter;GO:0008270,zinc ion binding;GO:0005634,nucleus;GO:0006366…	-
c6083_g1	2.29	0.66	5.57	-	-	7e-29 gnl|CDD|216528 pfam01490, Aa_trans, Transmembrane amino acid transporter protein. This transmembrane region is found in many amino acid transporters including UNC-47 and MTR. UNC-47 encodes a vesicular amino butyric acid (GABA) transporter, (VGAT). UNC-47 is predicted to have 10 transmembrane domains. MTR is a N system amino acid transporter system protein involved in methyltryptophan resis…	1e-21 gnl|CDD|229245 KOG1303, KOG1303, KOG1303, Amino acid transporters [Amino acid transport and metabolism].	0.0 gb|EGY19245.1| hypothetical protein VDAG_09705 [Verticillium dahliae VdLs.17]	-	1e-29 gnl|CDD|216528 pfam01490, Aa_trans, Transmembrane amino acid transporter protein. This transmembrane region is found in many amino acid transporters including UNC-47 and MTR. UNC-47 encodes a vesicular amino butyric acid (GABA) transporter, (VGAT). UNC-47 is predicted to have 10 transmembrane domains. MTR is a N system amino acid transporter system protein involved in methyltryptophan resis…	3e-35 sp|P38680|MTR_NEUCR N amino acid transport system protein OS=Neurospora crassa (strain ATCC 24698 / 74-OR23-1A / CBS 708.71 / DSM 1257 / FGSC 987) GN=mtr PE=3 SV=2	0.0 tr|G2XHF1|G2XHF1_VERDV Putative uncharacterized protein OS=Verticillium dahliae (strain VdLs.17 / ATCC MYA-4575 / FGSC 10137) GN=VDAG_09705 PE=4 SV=1	GO:0006865,amino acid transport;GO:0016021,integral to membrane	-
c6104_g1	6.7	14.53	1.73	-	-	-	-	-	-	-	-	-	-	-
c6150_g1	2.3	7.18	0.98	-	-	1e-171 gnl|CDD|199869 cd06248, M14_CP_A-B_like_1, Peptidase M14 carboxypeptidase subfamily A/B-like; uncharacterized subgroup. The Peptidase M14 Carboxypeptidase A/B-like subfamily is one of two main M14 carboxypeptidase subfamilies, defined by sequence and structural homology, the other being N/E. Carboxypeptidases (CPs) hydrolyze single, C-terminal amino acids from polypeptide chains. They have…	9e-103 gnl|CDD|230589 KOG2650, KOG2650, KOG2650, Zinc carboxypeptidase [Function unknown].	0.0 gb|EGY16076.1| carboxypeptidase A4 [Verticillium dahliae VdLs.17]	0.0 ref|XM_003000549.1| Verticillium albo-atrum VaMs.102 carboxypeptidase A4, mRNA	2e-83 gnl|CDD|215816 pfam00246, Peptidase_M14, Zinc carboxypeptidase.	2e-104 sp|C5FH26|MCPAL_ARTOC Metallocarboxypeptidase A-like protein MCYG_01475 OS=Arthroderma otae (strain ATCC MYA-4605 / CBS 113480) GN=MCYG_01475 PE=3 SV=1	0.0 tr|G2XBA2|G2XBA2_VERDV Carboxypeptidase A4 OS=Verticillium dahliae (strain VdLs.17 / ATCC MYA-4575 / FGSC 10137) GN=VDAG_07240 PE=4 SV=1	GO:0006508,proteolysis;GO:0009405,pathogenesis;GO:0008270,zinc ion binding;GO:0005576,extracellular region;GO:0004181,metallocarboxypeptidase activity;GO:0046872,metal ion binding	-
c6173_g1	4.17	1.45	64.65	-	-	2e-72 gnl|CDD|119408 cd06660, Aldo_ket_red, Aldo-keto reductases (AKRs) are a superfamily of soluble NAD(P)(H) oxidoreductases whose chief purpose is to reduce aldehydes and ketones to primary and secondary alcohols. AKRs are present in all phyla and are of importance to both health and industrial applications. Members have very distinct functions and include the prokaryotic 2,5-diketo-D-gluconic…	1e-68 gnl|CDD|229516 KOG1575, KOG1575, KOG1575, Voltage-gated shaker-like K+ channel, subunit beta/KCNAB [Energy production and conversion].	0.0 gb|EGY22067.1| aldo-keto reductase yakc [Verticillium dahliae VdLs.17]	0.0 ref|XM_003003872.1| Verticillium albo-atrum VaMs.102 auxin-induced protein PCNT115, mRNA	8e-63 gnl|CDD|215817 pfam00248, Aldo_ket_red, Aldo/keto reductase family. This family includes a number of K+ ion channel beta chain regulatory domains - these are reported to have oxidoreductase activity.	1e-65 sp|Q09923|YAKC_SCHPO Aldo-keto reductase yakc [NADP(+)] OS=Schizosaccharomyces pombe (strain 972 / ATCC 24843) GN=yakc PE=1 SV=1	0.0 tr|G2WZR5|G2WZR5_VERDV Aldo-keto reductase yakc OS=Verticillium dahliae (strain VdLs.17 / ATCC MYA-4575 / FGSC 10137) GN=VDAG_03507 PE=4 SV=1	GO:0033554,cellular response to stress;GO:0016614,oxidoreductase activity, acting on CH-OH group of donors;GO:0005829,cytosol;GO:0005634,nucleus	-
c6207_g1	2.35	0.78	5.06	VDBG_02879	hypothetical protein	0.0 gnl|CDD|221170 pfam11696, DUF3292, Protein of unknown function (DUF3292). This eukaryotic family of proteins has no known function.	-	0.0 ref|XP_003006740.1| conserved hypothetical protein [Verticillium alfalfae VaMs.102] gb|EEY16770.1| conserved hypothetical protein [Verticillium alfalfae VaMs.102]	0.0 ref|XM_003006694.1| Verticillium albo-atrum VaMs.102 conserved hypothetical protein, mRNA	0.0 gnl|CDD|221170 pfam11696, DUF3292, Protein of unknown function (DUF3292). This eukaryotic family of proteins has no known function.	-	0.0 tr|C9SCF5|C9SCF5_VERA1 Putative uncharacterized protein OS=Verticillium albo-atrum (strain VaMs.102 / ATCC MYA-4576 / FGSC 10136) GN=VDBG_02879 PE=4 SV=1	-	-
c6311_g1	21.65	1.85	5.89	-	-	-	-	6e-22 gb|EGY19988.1| hypothetical protein VDAG_02004 [Verticillium dahliae VdLs.17]	-	-	-	7e-22 tr|G2WWL8|G2WWL8_VERDV Putative uncharacterized protein OS=Verticillium dahliae (strain VdLs.17 / ATCC MYA-4575 / FGSC 10137) GN=VDAG_02004 PE=4 SV=1	-	-
c6388_g1	2.83	1.26	6.87	-	-	3e-113 gnl|CDD|185726 cd08985, GH43_6, Glycosyl hydrolase family 43. This glycosyl hydrolase family 43 (GH43) includes enzymes with beta-1,4-xylosidase (xylan 1,4-beta-xylosidase; EC 3.2.1.37), beta-1,3-xylosidase (EC 3.2.1.-), alpha-L-arabinofuranosidase (EC 3.2.1.55), arabinanase (EC 3.2.1.99), xylanase (EC 3.2.1.8), endo-alpha-L-arabinanase and galactan 1,3-beta-galactosidase (EC 3.2.1.145) ac…	-	0.0 gb|EGY21933.1| glycosyl hydrolase family 43 protein [Verticillium dahliae VdLs.17]	0.0 ref|XM_003003732.1| Verticillium albo-atrum VaMs.102 glycosyl hydrolase family 43 protein, mRNA	3e-12 gnl|CDD|218178 pfam04616, Glyco_hydro_43, Glycosyl hydrolases family 43. The glycosyl hydrolase family 43 contains members that are arabinanase. Rabinanases hydrolyses the alpha-1,5-linked L-arabinofuranoside backbone of plant cell wall arabinans. The structure of arabinanase Arb43A from Cellvibrio japonicus reveals a five-bladed beta-propeller fold. A long V-shaped groove, partially enclos…	-	0.0 tr|G2WZD1|G2WZD1_VERDV Glycosyl hydrolase family 43 protein OS=Verticillium dahliae (strain VdLs.17 / ATCC MYA-4575 / FGSC 10137) GN=VDAG_03373 PE=4 SV=1	GO:0004553,hydrolase activity, hydrolyzing O-glycosyl compounds;GO:0005975,carbohydrate metabolic process	-
c6390_g1	3.43	8.67	1.29	VDBG_02079	FAD binding domain-containing protein	1e-43 gnl|CDD|180582 PRK06475, PRK06475, salicylate hydroxylase; Provisional.	1e-15 gnl|CDD|230553 KOG2614, KOG2614, KOG2614, Kynurenine 3-monooxygenase and related flavoprotein monooxygenases [Energy production and conversion, General function prediction only].	0.0 ref|XP_003007891.1| FAD binding domain-containing protein [Verticillium alfalfae VaMs.102] gb|EEY15970.1| FAD binding domain-containing protein [Verticillium alfalfae VaMs.102]	0.0 ref|XM_003007845.1| Verticillium albo-atrum VaMs.102 FAD binding domain-containing protein, mRNA	-	6e-31 sp|Q3S4B7|3HBH_POLNA 3-hydroxybenzoate 6-hydroxylase OS=Polaromonas naphthalenivorans (strain CJ2) GN=nagX PE=1 SV=1	0.0 tr|C9S9A7|C9S9A7_VERA1 FAD binding domain-containing protein OS=Verticillium albo-atrum (strain VaMs.102 / ATCC MYA-4576 / FGSC 10136) GN=VDBG_02079 PE=4 SV=1	GO:0018669,3-hydroxybenzoate 6-monooxygenase activity;GO:0055114,oxidation-reduction process;GO:0016491,oxidoreductase activity;GO:0019439,aromatic compound catabolic process	K00480-ko01220,Degradation of aromatic compounds;ko00621,Dioxin degradation;ko00626,Naphthalene degradation;ko00624,Polycyclic aromatic hydrocarbon degradation
c6477_g2	10.72	1.11	3.87	-	-	-	-	9e-41 gb|EGY23733.1| hypothetical protein VDAG_05171 [Verticillium dahliae VdLs.17]	-	-	-	1e-40 tr|G2X4T9|G2X4T9_VERDV Putative uncharacterized protein OS=Verticillium dahliae (strain VdLs.17 / ATCC MYA-4575 / FGSC 10137) GN=VDAG_05171 PE=4 SV=1	GO:0004672,protein kinase activity;GO:0005524,ATP binding	-
c6574_g1	3.3	11.34	5.58	-	-	-	-	2e-56 gb|EGY17531.1| hypothetical protein VDAG_01213 [Verticillium dahliae VdLs.17]	3e-150 ref|XM_003005986.1| Verticillium albo-atrum VaMs.102 predicted protein, mRNA	-	-	2e-56 tr|G2WTU0|G2WTU0_VERDV Putative uncharacterized protein OS=Verticillium dahliae (strain VdLs.17 / ATCC MYA-4575 / FGSC 10137) GN=VDAG_01213 PE=4 SV=1	-	-
c6607_g1	0.5	3.38	1.29	-	-	5e-22 gnl|CDD|214830 smart00813, Alpha-L-AF_C, Alpha-L-arabinofuranosidase C-terminus. This entry represents the C terminus (approximately 200 residues) of bacterial and eukaryotic alpha-L-arabinofuranosidase. This catalyses the hydrolysis of non-reducing terminal alpha-L-arabinofuranosidic linkages in L-arabinose-containing polysaccharides.	-	0.0 gb|EGY18580.1| alpha-N-arabinofuranosidase A [Verticillium dahliae VdLs.17]	0.0 ref|XM_003000370.1| Verticillium albo-atrum VaMs.102 alpha-N-arabinofuranosidase A, mRNA	6e-20 gnl|CDD|219243 pfam06964, Alpha-L-AF_C, Alpha-L-arabinofuranosidase C-terminus. This family represents the C-terminus (approximately 200 residues) of bacterial and eukaryotic alpha-L-arabinofuranosidase (EC:3.2.1.55). This catalyzes the hydrolysis of nonreducing terminal alpha-L-arabinofuranosidic linkages in L-arabinose-containing polysaccharides.	1e-110 sp|Q0CTV2|ABFA_ASPTN Probable alpha-N-arabinofuranosidase A OS=Aspergillus terreus (strain NIH 2624 / FGSC A1156) GN=abfA PE=3 SV=1	0.0 tr|G2XFI2|G2XFI2_VERDV Alpha-N-arabinofuranosidase A OS=Verticillium dahliae (strain VdLs.17 / ATCC MYA-4575 / FGSC 10137) GN=VDAG_09106 PE=4 SV=1	GO:0046556,alpha-N-arabinofuranosidase activity;GO:0043169,cation binding;GO:0019566,arabinose metabolic process;GO:0046373,L-arabinose metabolic process;GO:0005576,extracellular region;GO:0031222,arabinan catabolic process	K01209-ko00520,Amino sugar and nucleotide sugar metabolism
c6817_g1	3.93	0.73	13.15	-	-	-	-	5e-53 gb|EGY23666.1| hypothetical protein VDAG_05104 [Verticillium dahliae VdLs.17]	2e-119 ref|XM_003002955.1| Verticillium albo-atrum VaMs.102 conserved hypothetical protein, mRNA	-	-	6e-53 tr|G2X4M2|G2X4M2_VERDV Putative uncharacterized protein OS=Verticillium dahliae (strain VdLs.17 / ATCC MYA-4575 / FGSC 10137) GN=VDAG_05104 PE=4 SV=1	-	-
c6835_g3	120.19	12.25	28.63	-	-	-	-	-	-	-	-	-	-	-
c6915_g2	3.31	0.99	10.78	-	-	1e-18 gnl|CDD|193475 pfam13002, LDB19, Arrestin_N terminal like. This is a family of proteins related to the Arrestin_N terminal family.	6e-06 gnl|CDD|231712 KOG3780, KOG3780, KOG3780, Thioredoxin binding protein TBP-2/VDUP1 [General function prediction only].	0.0 gb|EGY20534.1| hypothetical protein VDAG_10163 [Verticillium dahliae VdLs.17]	0.0 ref|XM_003001259.1| Verticillium albo-atrum VaMs.102 conserved hypothetical protein, mRNA	2e-19 gnl|CDD|193475 pfam13002, LDB19, Arrestin_N terminal like. This is a family of proteins related to the Arrestin_N terminal family.	1e-24 sp|Q10347|YDA5_SCHPO Uncharacterized protein C1F12.05 OS=Schizosaccharomyces pombe (strain 972 / ATCC 24843) GN=SPAC1F12.05 PE=4 SV=1	0.0 tr|G2XJ31|G2XJ31_VERDV Putative uncharacterized protein OS=Verticillium dahliae (strain VdLs.17 / ATCC MYA-4575 / FGSC 10137) GN=VDAG_10163 PE=4 SV=1	GO:0031625,ubiquitin protein ligase binding;GO:0030136,clathrin-coated vesicle;GO:0070086,ubiquitin-dependent endocytosis;GO:0005829,cytosol;GO:0005634,nucleus	-
c6933_g2	34.24	4.61	11.72	-	-	5e-71 gnl|CDD|215741 pfam00135, COesterase, Carboxylesterase family.	3e-44 gnl|CDD|229457 KOG1516, KOG1516, KOG1516, Carboxylesterase and related proteins [General function prediction only].	0.0 gb|EGY14102.1| para-nitrobenzyl esterase [Verticillium dahliae VdLs.17]	0.0 ref|XM_003009453.1| Verticillium albo-atrum VaMs.102 para-nitrobenzyl esterase, mRNA	1e-71 gnl|CDD|215741 pfam00135, COesterase, Carboxylesterase family.	1e-42 sp|P17573|LIP1_GEOCN Lipase 1 OS=Geotrichum candidum GN=LIP1 PE=1 SV=2	0.0 tr|G2WR03|G2WR03_VERDV Para-nitrobenzyl esterase OS=Verticillium dahliae (strain VdLs.17 / ATCC MYA-4575 / FGSC 10137) GN=VDAG_00784 PE=4 SV=1	GO:0016787,hydrolase activity;GO:0004806,triglyceride lipase activity;GO:0050253,retinyl-palmitate esterase activity;GO:0016042,lipid catabolic process;GO:0005576,extracellular region	-
c709_g1	7.12	25.9	3.4	-	-	-	-	0.0 gb|EGY15096.1| hypothetical protein VDAG_06586 [Verticillium dahliae VdLs.17]	0.0 ref|XM_003001081.1| Verticillium albo-atrum VaMs.102 conserved hypothetical protein, mRNA	-	-	0.0 tr|G2X7X8|G2X7X8_VERDV Putative uncharacterized protein OS=Verticillium dahliae (strain VdLs.17 / ATCC MYA-4575 / FGSC 10137) GN=VDAG_06586 PE=4 SV=1	-	-
c7117_g1	43.63	3.44	16.11	NECHADRAFT_56027	hypothetical protein	6e-26 gnl|CDD|219997 pfam08740, BCS1_N, BCS1 N terminal. This domain is found at the N terminal of the mitochondrial ATPase BSC1. It encodes the import and intramitochondrial sorting for the protein.	3e-57 gnl|CDD|228690 KOG0743, KOG0743, KOG0743, AAA+-type ATPase [Posttranslational modification, protein turnover, chaperones].	1e-143 ref|XP_003039516.1| hypothetical protein NECHADRAFT_56027 [Nectria haematococca mpVI 77-13-4] gb|EEU33803.1| hypothetical protein NECHADRAFT_56027 [Nectria haematococca mpVI 77-13-4]	0.0 ref|XM_003039470.1| Nectria haematococca mpVI 77-13-4 hypothetical protein, mRNA	1e-26 gnl|CDD|219997 pfam08740, BCS1_N, BCS1 N terminal. This domain is found at the N terminal of the mitochondrial ATPase BSC1. It encodes the import and intramitochondrial sorting for the protein.	6e-54 sp|Q54DY9|BCS1B_DICDI Probable mitochondrial chaperone BCS1-B OS=Dictyostelium discoideum GN=bcsl1b PE=3 SV=1	1e-143 tr|C7ZQA2|C7ZQA2_NECH7 Putative uncharacterized protein OS=Nectria haematococca (strain 77-13-4 / ATCC MYA-4622 / FGSC 9596 / MPVI) GN=NECHADRAFT_56027 PE=4 SV=1	GO:0016887,ATPase activity;GO:0005743,mitochondrial inner membrane;GO:0005524,ATP binding;GO:0017111,nucleoside-triphosphatase activity;GO:0016021,integral to membrane;GO:0005739,mitochondrion;GO:0051131,chaperone-mediated protein complex assembly	K08900
c7123_g4	19.66	0.81	5.92	-	-	-	-	-	-	-	-	-	-	-
c7146_g1	10960	94.19	3439.76	-	-	3e-10 gnl|CDD|215655 pfam00011, HSP20, Hsp20/alpha crystallin family.	3e-07 gnl|CDD|228657 KOG0710, KOG0710, KOG0710, Molecular chaperone (small heat-shock protein Hsp26/Hsp42) [Posttranslational modification, protein turnover, chaperones].	3e-154 gb|EGY18463.1| 30 kDa heat shock protein [Verticillium dahliae VdLs.17]	0.0 ref|XM_003004767.1| Verticillium albo-atrum VaMs.102 30 kDa heat shock protein, mRNA	7e-11 gnl|CDD|215655 pfam00011, HSP20, Hsp20/alpha crystallin family.	7e-67 sp|P19752|HSP30_NEUCR 30 kDa heat shock protein OS=Neurospora crassa (strain ATCC 24698 / 74-OR23-1A / CBS 708.71 / DSM 1257 / FGSC 987) GN=hsp30 PE=3 SV=1	3e-154 tr|G2XF65|G2XF65_VERDV 30 kDa heat shock protein OS=Verticillium dahliae (strain VdLs.17 / ATCC MYA-4575 / FGSC 10137) GN=VDAG_08797 PE=3 SV=1	GO:0005737,cytoplasm;GO:0006950,response to stress	-
c7148_g1	1576.12	82.45	450.97	-	-	2e-63 gnl|CDD|187586 cd05325, carb_red_sniffer_like_SDR_c, carbonyl reductase sniffer-like, classical (c) SDRs. Sniffer is an NADPH-dependent carbonyl reductase of the classical SDR family. Studies in Drosophila melanogaster implicate Sniffer in the prevention of neurodegeneration due to aging and oxidative-stress. This subgroup also includes Rhodococcus sp. AD45 IsoH, which is an NAD-dependent 1…	1e-40 gnl|CDD|229552 KOG1611, KOG1611, KOG1611, Predicted short chain-type dehydrogenase [General function prediction only].	3e-163 gb|EGY22045.1| aflatoxin biosynthesis ketoreductase nor-1 [Verticillium dahliae VdLs.17]	0.0 ref|XM_003003846.1| Verticillium albo-atrum VaMs.102 aflatoxin biosynthesis ketoreductase nor-1, mRNA	9e-14 gnl|CDD|215720 pfam00106, adh_short, short chain dehydrogenase. This family contains a wide variety of dehydrogenases.	4e-47 sp|Q00278|NOR1_ASPPA Aflatoxin biosynthesis ketoreductase nor-1 OS=Aspergillus parasiticus GN=nor-1 PE=3 SV=1	4e-163 tr|G2WZP3|G2WZP3_VERDV Aflatoxin biosynthesis ketoreductase nor-1 OS=Verticillium dahliae (strain VdLs.17 / ATCC MYA-4575 / FGSC 10137) GN=VDAG_03485 PE=4 SV=1	GO:0045122,aflatoxin biosynthetic process;GO:0055114,oxidation-reduction process;GO:0000166,nucleotide binding;GO:0016491,oxidoreductase activity	K17644-ko00254,Aflatoxin biosynthesis
c7271_g1	557.27	69.73	1877.54	-	-	-	-	2e-88 gb|EGY14075.1| hypothetical protein VDAG_00757 [Verticillium dahliae VdLs.17]	0.0 ref|XM_003009421.1| Verticillium albo-atrum VaMs.102 conserved hypothetical protein, mRNA	-	-	3e-88 tr|G2WQW5|G2WQW5_VERDV Putative uncharacterized protein OS=Verticillium dahliae (strain VdLs.17 / ATCC MYA-4575 / FGSC 10137) GN=VDAG_00757 PE=4 SV=1	-	-
c7292_g1	229.55	42.48	752.38	-	-	3e-128 gnl|CDD|222461 pfam13933, HRXXH, Putative peptidase family. This family of putative peptidases are closely related to the M35 family pfam02102. In this family the metal binding HEXXH motif is replaced with HRXXH. The exact function of these proteins is unknown. Members of this family are found to be fungal allergens.	-	0.0 gb|AAS45249.1| allergen Asp f2-like protein [Verticillium dahliae]	0.0 gb|AY524791.1| Verticillium dahliae allergen Asp f2-like protein mRNA, complete cds	6e-129 gnl|CDD|222461 pfam13933, HRXXH, Putative peptidase family. This family of putative peptidases are closely related to the M35 family pfam02102. In this family the metal binding HEXXH motif is replaced with HRXXH. The exact function of these proteins is unknown. Members of this family are found to be fungal allergens.	4e-69 sp|Q00746|ANG1_EMENI Antigen 1 OS=Emericella nidulans (strain FGSC A4 / ATCC 38163 / CBS 112.46 / NRRL 194 / M139) GN=aspnd1 PE=3 SV=1	0.0 tr|Q6QUX8|Q6QUX8_VERDA Allergen Asp f2-like protein OS=Verticillium dahliae PE=2 SV=1	-	-
c7309_g1	86.12	28.51	250.98	VDBG_05974	hypothetical protein	2e-21 gnl|CDD|189870 pfam01172, SBDS, Shwachman-Bodian-Diamond syndrome (SBDS) protein. This family is highly conserved in species ranging from archaea to vertebrates and plants. The family contains several Shwachman-Bodian-Diamond syndrome (SBDS) proteins from both mouse and humans. Shwachman-Diamond syndrome is an autosomal recessive disorder with clinical features that include pancreatic exocr…	4e-06 gnl|CDD|230856 KOG2917, KOG2917, KOG2917, Predicted exosome subunit [Translation, ribosomal structure and biogenesis].	1e-69 ref|XP_003003532.1| conserved hypothetical protein [Verticillium alfalfae VaMs.102] gb|EEY19865.1| conserved hypothetical protein [Verticillium alfalfae VaMs.102] gb|EGY21694.1| hypothetical protein VDAG_03134 [Verticillium dahliae VdLs.17]	5e-154 ref|XM_003003486.1| Verticillium albo-atrum VaMs.102 conserved hypothetical protein, mRNA	4e-22 gnl|CDD|189870 pfam01172, SBDS, Shwachman-Bodian-Diamond syndrome (SBDS) protein. This family is highly conserved in species ranging from archaea to vertebrates and plants. The family contains several Shwachman-Bodian-Diamond syndrome (SBDS) proteins from both mouse and humans. Shwachman-Diamond syndrome is an autosomal recessive disorder with clinical features that include pancreatic exocr…	2e-11 sp|Q9P7K6|SDO1L_SCHPO SDO1-like protein C21C3.19 OS=Schizosaccharomyces pombe (strain 972 / ATCC 24843) GN=SPBC21C3.19 PE=3 SV=1	2e-69 tr|G2WYP2|G2WYP2_VERDV Putative uncharacterized protein OS=Verticillium dahliae (strain VdLs.17 / ATCC MYA-4575 / FGSC 10137) GN=VDAG_03134 PE=4 SV=1	GO:0033554,cellular response to stress;GO:0005829,cytosol;GO:0016070,RNA metabolic process;GO:0005634,nucleus	-
c7339_g1	938.34	19.34	342.5	-	-	0.0 gnl|CDD|234173 TIGR03346, chaperone_ClpB, ATP-dependent chaperone ClpB. Members of this protein family are the bacterial ATP-dependent chaperone ClpB. This protein belongs to the AAA family, ATPases associated with various cellular activities (pfam00004). This molecular chaperone does not act as a protease, but rather serves to disaggregate misfolded and aggregated proteins [Protein fate, Pro…	0.0 gnl|CDD|228997 KOG1051, KOG1051, KOG1051, Chaperone HSP104 and related ATP-dependent Clp proteases [Posttranslational modification, protein turnover, chaperones].	0.0 gb|EGY14665.1| heat shock protein HSP98 [Verticillium dahliae VdLs.17]	0.0 ref|XM_003003154.1| Verticillium albo-atrum VaMs.102 heat shock protein HSP98, mRNA	5e-70 gnl|CDD|219536 pfam07724, AAA_2, AAA domain (Cdc48 subfamily). This Pfam entry includes some of the AAA proteins not detected by the pfam00004 model.	0.0 sp|P31540|HSP98_NEUCR Heat shock protein hsp98 OS=Neurospora crassa (strain ATCC 24698 / 74-OR23-1A / CBS 708.71 / DSM 1257 / FGSC 987) GN=hsp98 PE=1 SV=2	0.0 tr|G2X6P7|G2X6P7_VERDV Heat shock protein HSP98 OS=Verticillium dahliae (strain VdLs.17 / ATCC MYA-4575 / FGSC 10137) GN=VDAG_05829 PE=3 SV=1	GO:0005737,cytoplasm;GO:0019538,protein metabolic process;GO:0005524,ATP binding;GO:0006950,response to stress;GO:0017111,nucleoside-triphosphatase activity;GO:0005634,nucleus	K03695
c7343_g1	9.7	27.4	3.51	-	-	0.0 gnl|CDD|237436 PRK13581, PRK13581, D-3-phosphoglycerate dehydrogenase; Provisional.	3e-121 gnl|CDD|228019 KOG0068, KOG0068, KOG0068, D-3-phosphoglycerate dehydrogenase, D-isomer-specific 2-hydroxy acid dehydrogenase superfamily [Amino acid transport and metabolism].	0.0 gb|EGY17914.1| D-3-phosphoglycerate dehydrogenase [Verticillium dahliae VdLs.17]	0.0 ref|XM_003001795.1| Verticillium albo-atrum VaMs.102 D-3-phosphoglycerate dehydrogenase, mRNA	2e-92 gnl|CDD|215893 pfam00389, 2-Hacid_dh, D-isomer specific 2-hydroxyacid dehydrogenase, catalytic domain. This family represents the largest portion of the catalytic domain of 2-hydroxyacid dehydrogenases as the NAD binding domain is inserted within the structural domain.	5e-114 sp|O04130|SERA_ARATH D-3-phosphoglycerate dehydrogenase, chloroplastic OS=Arabidopsis thaliana GN=At1g17745 PE=1 SV=2	0.0 tr|G2WSK0|G2WSK0_VERDV D-3-phosphoglycerate dehydrogenase OS=Verticillium dahliae (strain VdLs.17 / ATCC MYA-4575 / FGSC 10137) GN=VDAG_01596 PE=3 SV=1	GO:0016597,amino acid binding;GO:0006564,L-serine biosynthetic process;GO:0009507,chloroplast;GO:0051287,NAD binding;GO:0004617,phosphoglycerate dehydrogenase activity	K00058-ko01200,Carbon metabolism;ko01230,Biosynthesis of amino acids;ko00680,Methane metabolism;ko00260,Glycine, serine and threonine metabolism
c7709_g1	0.71	19.37	0.1	-	-	3e-62 gnl|CDD|225186 COG2303, BetA, Choline dehydrogenase and related flavoproteins [Amino acid transport and metabolism].	1e-69 gnl|CDD|229180 KOG1238, KOG1238, KOG1238, Glucose dehydrogenase/choline dehydrogenase/mandelonitrile lyase (GMC oxidoreductase family) [General function prediction only].	0.0 gb|EGY19381.1| alcohol oxidase [Verticillium dahliae VdLs.17]	0.0 ref|XM_003002208.1| Verticillium albo-atrum VaMs.102 alcohol oxidase, mRNA	6e-40 gnl|CDD|216089 pfam00732, GMC_oxred_N, GMC oxidoreductase. This family of proteins bind FAD as a cofactor.	0.0 sp|Q00922|ALOX_CANBO Alcohol oxidase OS=Candida boidinii GN=AOD1 PE=1 SV=1	0.0 tr|G2XHT3|G2XHT3_VERDV Alcohol oxidase OS=Verticillium dahliae (strain VdLs.17 / ATCC MYA-4575 / FGSC 10137) GN=VDAG_09583 PE=3 SV=1	GO:0050660,flavin adenine dinucleotide binding;GO:0006066,alcohol metabolic process;GO:0015945,methanol metabolic process;GO:0008812,choline dehydrogenase activity;GO:0005777,peroxisome;GO:0046188,methane catabolic process;GO:0047639,alcohol oxidase activity	K17066-ko01200,Carbon metabolism;ko00680,Methane metabolism
c7758_g1	14.93	2.03	6.82	-	-	-	-	-	-	-	-	-	-	-
c7889_g1	6.56	0	1.67	-	-	3e-22 gnl|CDD|238125 cd00204, ANK, ankyrin repeats; ankyrin repeats mediate protein-protein interactions in very diverse families of proteins. The number of ANK repeats in a protein can range from 2 to over 20 (ankyrins, for example). ANK repeats may occur in combinations with other types of domains. The structural repeat unit contains two antiparallel helices and a beta-hairpin, repeats are stac…	4e-13 gnl|CDD|232107 KOG4177, KOG4177, KOG4177, Ankyrin [Cell wall/membrane/envelope biogenesis].	2e-160 gb|EGY14428.1| hypothetical protein VDAG_05592 [Verticillium dahliae VdLs.17]	-	1e-14 gnl|CDD|205076 pfam12796, Ank_2, Ankyrin repeats (3 copies).	7e-17 sp|Q12955|ANK3_HUMAN Ankyrin-3 OS=Homo sapiens GN=ANK3 PE=1 SV=3	2e-160 tr|G2X5T7|G2X5T7_VERDV Putative uncharacterized protein OS=Verticillium dahliae (strain VdLs.17 / ATCC MYA-4575 / FGSC 10137) GN=VDAG_05592 PE=4 SV=1	GO:0016323,basolateral plasma membrane;GO:0072661,protein targeting to plasma membrane;GO:0072660,maintenance of protein location in plasma membrane;GO:0014704,intercalated disc;GO:0007411,axon guidance;GO:0030315,T-tubule;GO:0007165,signal transduction;GO:0043266,regulation of potassium ion transport;GO:0005764,lysosome;GO:0010765,positive regulation of sodium ion transport;GO:0010628,positive r…	-
c7988_g1	22.75	3.08	47.7	-	-	-	-	2e-142 gb|EGY22347.1| hypothetical protein VDAG_03785 [Verticillium dahliae VdLs.17]	0.0 ref|XM_003006688.1| Verticillium albo-atrum VaMs.102 conserved hypothetical protein, mRNA	-	-	2e-142 tr|G2X0K6|G2X0K6_VERDV Putative uncharacterized protein OS=Verticillium dahliae (strain VdLs.17 / ATCC MYA-4575 / FGSC 10137) GN=VDAG_03785 PE=4 SV=1	-	-
c880_g1	25.17	0.53	3.99	-	-	-	-	-	-	-	-	-	-	-
c9124_g1	316.22	39.02	111.29	-	-	0.0 gnl|CDD|234173 TIGR03346, chaperone_ClpB, ATP-dependent chaperone ClpB. Members of this protein family are the bacterial ATP-dependent chaperone ClpB. This protein belongs to the AAA family, ATPases associated with various cellular activities (pfam00004). This molecular chaperone does not act as a protease, but rather serves to disaggregate misfolded and aggregated proteins [Protein fate, Pro…	0.0 gnl|CDD|228997 KOG1051, KOG1051, KOG1051, Chaperone HSP104 and related ATP-dependent Clp proteases [Posttranslational modification, protein turnover, chaperones].	0.0 gb|EGY22927.1| heat shock protein [Verticillium dahliae VdLs.17]	0.0 ref|XM_003005173.1| Verticillium albo-atrum VaMs.102 heat shock protein, mRNA	7e-68 gnl|CDD|219536 pfam07724, AAA_2, AAA domain (Cdc48 subfamily). This Pfam entry includes some of the AAA proteins not detected by the pfam00004 model.	0.0 sp|O74402|HSP78_SCHPO Heat shock protein 78, mitochondrial OS=Schizosaccharomyces pombe (strain 972 / ATCC 24843) GN=hsp78 PE=3 SV=1	0.0 tr|G2X241|G2X241_VERDV Heat shock protein OS=Verticillium dahliae (strain VdLs.17 / ATCC MYA-4575 / FGSC 10137) GN=VDAG_04365 PE=3 SV=1	GO:0016887,ATPase activity;GO:0000002,mitochondrial genome maintenance;GO:0030150,protein import into mitochondrial matrix;GO:0005759,mitochondrial matrix;GO:0005524,ATP binding;GO:0006950,response to stress;GO:0043335,protein unfolding;GO:0017111,nucleoside-triphosphatase activity;GO:0010892,positive regulation of mitochondrial translation in response to stress;GO:0034605,cellular response to he…	K03695
c9167_g1	16	279.47	3.85	-	-	3e-51 gnl|CDD|233174 TIGR00893, 2A0114, D-galactonate transporter. [Transport and binding proteins, Carbohydrates, organic alcohols, and acids].	5e-76 gnl|CDD|230472 KOG2533, KOG2533, KOG2533, Permease of the major facilitator superfamily [Carbohydrate transport and metabolism].	0.0 gb|EGY20253.1| pantothenate transporter liz1 [Verticillium dahliae VdLs.17]	0.0 ref|XM_003001993.1| Verticillium albo-atrum VaMs.102 pantothenate transporter liz1, mRNA	2e-33 gnl|CDD|219516 pfam07690, MFS_1, Major Facilitator Superfamily.	1e-43 sp|Q9US44|YIZG_SCHPO Uncharacterized transporter C1002.16c OS=Schizosaccharomyces pombe (strain 972 / ATCC 24843) GN=SPAC1002.16c PE=3 SV=1	0.0 tr|G2WVC8|G2WVC8_VERDV Pantothenate transporter liz1 OS=Verticillium dahliae (strain VdLs.17 / ATCC MYA-4575 / FGSC 10137) GN=VDAG_02269 PE=4 SV=1	GO:0005887,integral to plasma membrane;GO:0035353,nicotinamide mononucleotide transmembrane transport;GO:0032153,cell division site;GO:0016021,integral to membrane;GO:0055085,transmembrane transport;GO:0051286,cell tip;GO:0005794,Golgi apparatus;GO:0015663,nicotinamide mononucleotide transmembrane transporter activity	-
c9250_g1	75.57	8.82	23.82	-	-	-	2e-07 gnl|CDD|229886 KOG1947, KOG1947, KOG1947, Leucine rich repeat proteins, some proteins contain F-box [General function prediction only].	0.0 gb|EGY15821.1| F-box protein [Verticillium dahliae VdLs.17]	0.0 ref|XM_003004174.1| Verticillium albo-atrum VaMs.102 leucine Rich Repeat domain-containing protein, mRNA	-	1e-24 sp|Q06479|YL352_YEAST F-box protein YLR352W OS=Saccharomyces cerevisiae (strain ATCC 204508 / S288c) GN=YLR352W PE=1 SV=1	0.0 tr|G2XA82|G2XA82_VERDV F-box protein OS=Verticillium dahliae (strain VdLs.17 / ATCC MYA-4575 / FGSC 10137) GN=VDAG_06985 PE=4 SV=1	GO:0019005,SCF ubiquitin ligase complex;GO:0016567,protein ubiquitination	-
c9271_g1	29	2.13	9.53	-	-	-	-	-	-	-	-	-	-	-
c9298_g1	49.99	1.56	5.68	-	-	-	-	-	-	-	-	-	-	-
c9367_g1	5.32	104.01	2.48	-	-	-	-	0.0 gb|EGY16032.1| hypothetical protein VDAG_07196 [Verticillium dahliae VdLs.17]	0.0 ref|XM_003000503.1| Verticillium albo-atrum VaMs.102 alcohol dehydrogenase, mRNA	-	-	0.0 tr|G2XB58|G2XB58_VERDV Putative uncharacterized protein OS=Verticillium dahliae (strain VdLs.17 / ATCC MYA-4575 / FGSC 10137) GN=VDAG_07196 PE=4 SV=1	-	-
c9396_g1	29.9	4.16	10.37	VDBG_00295	indoleamine 2,3-dioxygenase family protein	2e-41 gnl|CDD|216378 pfam01231, IDO, Indoleamine 2,3-dioxygenase.	-	0.0 ref|XP_003008614.1| indoleamine 2,3-dioxygenase family protein [Verticillium alfalfae VaMs.102] gb|EEY14188.1| indoleamine 2,3-dioxygenase family protein [Verticillium alfalfae VaMs.102]	0.0 ref|XM_003008568.1| Verticillium albo-atrum VaMs.102 indoleamine 2,3-dioxygenase family protein, mRNA	4e-42 gnl|CDD|216378 pfam01231, IDO, Indoleamine 2,3-dioxygenase.	2e-18 sp|Q9ERD9|I23O1_RAT Indoleamine 2,3-dioxygenase 1 OS=Rattus norvegicus GN=Ido1 PE=2 SV=1	0.0 tr|C9S588|C9S588_VERA1 Indoleamine 2,3-dioxygenase family protein OS=Verticillium albo-atrum (strain VaMs.102 / ATCC MYA-4576 / FGSC 10136) GN=VDBG_00295 PE=4 SV=1	GO:0034276,kynurenic acid biosynthetic process;GO:0016597,amino acid binding;GO:0043065,positive regulation of apoptotic process;GO:0033555,multicellular organismal response to stress;GO:0033754,indoleamine 2,3-dioxygenase activity;GO:0016702,oxidoreductase activity, acting on single donors with incorporation of molecular oxygen, incorporation of two atoms of oxygen;GO:0007610,behavior;GO:0020037…	K00463-ko00380,Tryptophan metabolism;ko05143,African trypanosomiasis
c9423_g1	39.56	19.56	95.2	-	-	6e-57 gnl|CDD|219653 pfam07942, N2227, N2227-like protein. This family features sequences that are similar to a region of hypothetical yeast gene product N2227. This is thought to be expressed during meiosis and may be involved in the defence response to stressful conditions.	2e-57 gnl|CDD|230737 KOG2798, KOG2798, KOG2798, Putative trehalase [Carbohydrate transport and metabolism].	0.0 gb|EGY15975.1| hypothetical protein VDAG_07139 [Verticillium dahliae VdLs.17]	0.0 ref|XM_003004329.1| Verticillium albo-atrum VaMs.102 conserved hypothetical protein, mRNA	1e-57 gnl|CDD|219653 pfam07942, N2227, N2227-like protein. This family features sequences that are similar to a region of hypothetical yeast gene product N2227. This is thought to be expressed during meiosis and may be involved in the defence response to stressful conditions.	4e-39 sp|Q80UY1|CI041_MOUSE UPF0586 protein C9orf41 homolog OS=Mus musculus PE=2 SV=1	0.0 tr|G2X9U4|G2X9U4_VERDV Putative uncharacterized protein OS=Verticillium dahliae (strain VdLs.17 / ATCC MYA-4575 / FGSC 10137) GN=VDAG_07139 PE=4 SV=1	-	K19787
c9557_g1	29.27	0.24	10.64	-	-	0.0 gnl|CDD|143421 cd07103, ALDH_F5_SSADH_GabD, Mitochondrial succinate-semialdehyde dehydrogenase and ALDH family members 5A1 and 5F1-like. Succinate-semialdehyde dehydrogenase, mitochondrial (SSADH, GabD, EC=1.2.1.24) catalyzes the NAD+-dependent oxidation of succinate semialdehyde (SSA) to succinate. This group includes the human aldehyde dehydrogenase family 5 member A1 (ALDH5A1) which is a m…	0.0 gnl|CDD|230390 KOG2451, KOG2451, KOG2451, Aldehyde dehydrogenase [Energy production and conversion].	0.0 gb|EGY21905.1| succinate-semialdehyde dehydrogenase [Verticillium dahliae VdLs.17]	0.0 ref|XM_003003703.1| Verticillium albo-atrum VaMs.102 succinate-semialdehyde dehydrogenase, mRNA	0.0 gnl|CDD|215767 pfam00171, Aldedh, Aldehyde dehydrogenase family. This family of dehydrogenases act on aldehyde substrates. Members use NADP as a cofactor. The family includes the following members: The prototypical members are the aldehyde dehydrogenases EC:1.2.1.3. Succinate-semialdehyde dehydrogenase EC:1.2.1.16. Lactaldehyde dehydrogenase EC:1.2.1.22. Benzaldehyde dehydrogenase EC:1.2.1.28…	3e-170 sp|P38067|UGA2_YEAST Succinate-semialdehyde dehydrogenase [NADP(+)] OS=Saccharomyces cerevisiae (strain ATCC 204508 / S288c) GN=UGA2 PE=1 SV=2	0.0 tr|G2WZA3|G2WZA3_VERDV Succinate-semialdehyde dehydrogenase OS=Verticillium dahliae (strain VdLs.17 / ATCC MYA-4575 / FGSC 10137) GN=VDAG_03345 PE=3 SV=1	GO:0005737,cytoplasm;GO:0034599,cellular response to oxidative stress;GO:0009450,gamma-aminobutyric acid catabolic process;GO:0016620,oxidoreductase activity, acting on the aldehyde or oxo group of donors, NAD or NADP as acceptor;GO:0009013,succinate-semialdehyde dehydrogenase [NAD(P)+] activity;GO:0006540,glutamate decarboxylation to succinate	K00135-ko00650,Butanoate metabolism;ko00250,Alanine, aspartate and glutamate metabolism;ko00310,Lysine degradation;ko00350,Tyrosine metabolism
c9574_g1	3.11	32.75	9.34	VDBG_08421	oligopeptide transporter	6e-70 gnl|CDD|217401 pfam03169, OPT, OPT oligopeptide transporter protein. The OPT family of oligopeptide transporters is distinct from the ABC pfam00005 and PTR pfam00854 transporter families. OPT transporters were first recognised in fungi (Candida albicans and Schizosaccharomyces pombe), but this alignment also includes orthologues from Arabidopsis thaliana. OPT transporters are thought to hav…	-	0.0 ref|XP_003001376.1| oligopeptide transporter [Verticillium alfalfae VaMs.102] gb|EEY22311.1| oligopeptide transporter [Verticillium alfalfae VaMs.102]	0.0 ref|XM_003001330.1| Verticillium albo-atrum VaMs.102 oligopeptide transporter, mRNA	1e-70 gnl|CDD|217401 pfam03169, OPT, OPT oligopeptide transporter protein. The OPT family of oligopeptide transporters is distinct from the ABC pfam00005 and PTR pfam00854 transporter families. OPT transporters were first recognised in fungi (Candida albicans and Schizosaccharomyces pombe), but this alignment also includes orthologues from Arabidopsis thaliana. OPT transporters are thought to hav…	1e-17 sp|Q0J932|YSL10_ORYSJ Probable metal-nicotianamine transporter YSL10 OS=Oryza sativa subsp. japonica GN=YSL10 PE=2 SV=2	0.0 tr|C9SU00|C9SU00_VERA1 Oligopeptide transporter OS=Verticillium albo-atrum (strain VaMs.102 / ATCC MYA-4576 / FGSC 10136) GN=VDBG_08421 PE=4 SV=1	GO:0016021,integral to membrane;GO:0005886,plasma membrane;GO:0055085,transmembrane transport	-
c9727_g1	5.56	1.74	17.51	AFLA_040630	short-chain dehydrogenase/reductase family protein, putative	8e-37 gnl|CDD|212492 cd05327, retinol-DH_like_SDR_c_like, retinol dehydrogenase (retinol-DH), Light dependent Protochlorophyllide (Pchlide) OxidoReductase (LPOR) and related proteins, classical (c) SDRs. Classical SDR subgroup containing retinol-DHs, LPORs, and related proteins. Retinol is processed by a medium chain alcohol dehydrogenase followed by retinol-DHs. Pchlide reductases act in chlorop…	8e-33 gnl|CDD|229150 KOG1208, KOG1208, KOG1208, Dehydrogenases with different specificities (related to short-chain alcohol dehydrogenases) [Secondary metabolites biosynthesis, transport and catabolism].	0.0 ref|XP_002377525.1| short-chain dehydrogenase/reductase family protein, putative [Aspergillus flavus NRRL3357] gb|EED52361.1| short-chain dehydrogenase/reductase family protein, putative [Aspergillus flavus NRRL3357]	0.0 ref|XM_002377484.1| Aspergillus flavus NRRL3357 short-chain dehydrogenase/reductase family protein, putative, mRNA	-	2e-15 sp|Q5SS80|DHR13_MOUSE Dehydrogenase/reductase SDR family member 13 OS=Mus musculus GN=Dhrs13 PE=1 SV=1	0.0 tr|B8NC88|B8NC88_ASPFN Short-chain dehydrogenase/reductase family protein, putative OS=Aspergillus flavus (strain ATCC 200026 / FGSC A1120 / NRRL 3357 / JCM 12722 / SRRC 167) GN=AFLA_040630 PE=4 SV=1	GO:0055114,oxidation-reduction process;GO:0000166,nucleotide binding;GO:0005576,extracellular region;GO:0016491,oxidoreductase activity	-
c9730_g1	0.4	17.89	7.61	-	-	1e-31 gnl|CDD|203516 pfam06766, Hydrophobin_2, Fungal hydrophobin. This is a family of fungal hydrophobins that seems to be restricted to ascomycetes. These are small, moderately hydrophobic extracellular proteins that have eight cysteine residues arranged in a strictly conserved motif. Hydrophobins are generally found on the outer surface of conidia and of the hyphal wall, and may be involved in…	-	2e-45 gb|EGY18796.1| hypothetical protein VDAG_08956 [Verticillium dahliae VdLs.17]	2e-130 ref|XM_003003996.1| Verticillium albo-atrum VaMs.102 hydrophobin, mRNA	2e-32 gnl|CDD|203516 pfam06766, Hydrophobin_2, Fungal hydrophobin. This is a family of fungal hydrophobins that seems to be restricted to ascomycetes. These are small, moderately hydrophobic extracellular proteins that have eight cysteine residues arranged in a strictly conserved motif. Hydrophobins are generally found on the outer surface of conidia and of the hyphal wall, and may be involved in…	4e-19 sp|Q9UVI4|THYD_CLAFS Trihydrophobin OS=Claviceps fusiformis GN=TH1 PE=1 SV=1	3e-45 tr|G2XFX7|G2XFX7_VERDV Putative uncharacterized protein OS=Verticillium dahliae (strain VdLs.17 / ATCC MYA-4575 / FGSC 10137) GN=VDAG_08956 PE=4 SV=1	GO:0030446,hyphal cell wall;GO:0005576,extracellular region;GO:0045230,capsule organization;GO:0030448,hyphal growth	-
c9757_g1	33.41	0.29	2.56	-	-	-	-	-	-	-	-	-	-	-
